# Supplementary material for: Comparison of gut microbiota between adults with autism spectrum disorder and obese adults
Source: PeerJ. 2021 Mar 1;9:e10946. doi: 10.7717/peerj.10946 (PMC7931713; doi:10.7717/peerj.10946)
Supplement: Data S1 [file peerj-09-10946-s001.xlsx]

## Sheet: 0.03-OTU
Supplemental Table 1. Reads number of each OTU in different samples.
OTU	taxonomy	ASD-01	ASD-02	ASD-03	ASD-04	ASD-05	ASD-06	ASD-07	ASD-08	ASD-09	ASD-10	ASD-11	ASD-12	ASD-13	ASD-14	ASD-15	ASD-16	ASD-17	ASD-18	ASD-19	ASD-20	ASD-21	Obesity-01	Obesity-02	Obesity-03	Obesity-04	Obesity-05	Obesity-06	Obesity-07	Obesity-08	Obesity-09	Obesity-10	Obesity-11	Obesity-12	Obesity-13	Obesity-14	Obesity-15	Obesity-16	Obesity-17	Obesity-18	Obesity-19	Obesity-20	Obesity-21
Otu00001	Bacteria;Bacteroidetes;Bacteroidia;Bacteroidales;Prevotellaceae;Prevotella	22	16930	25815	25222	9073	0	0	0	1424	7886	2	1	20202	12082	13768	3421	16547	26146	0	0	3003	0	22233	15256	24032	0	13208	18013	0	1	19410	0	0	303	0	18475	0	20190	26172	12283	0	11175
Otu00002	Bacteria;Firmicutes;Negativicutes;Selenomonadales;Veillonellaceae;Megamonas	15	534	600	5	0	0	0	0	0	0	1	0	0	0	764	175	145	31	185	0	0	4946	857	6170	4920	13118	10415	2635	0	36	221	0	347	703	0	4258	0	3760	5172	11307	0	0
Otu00003	Bacteria;Bacteroidetes;Bacteroidia;Bacteroidales;Bacteroidaceae;Bacteroides	8579	1104	112	17	135	794	6788	3628	145	3	148	1291	56	53	221	831	7	38	1298	365	1153	703	40	226	44	176	18	4859	570	3353	34	11824	727	1232	7812	6	1585	26	45	131	1538	425
Otu00004	Bacteria;Bacteroidetes;Bacteroidia;Bacteroidales;Bacteroidaceae;Bacteroides	0	406	0	0	0	0	0	1	131	0	0	0	0	0	365	9	3	0	1	12474	0	0	2428	672	571	8137	0	0	11860	0	87	0	0	0	169	0	8890	22	76	2185	10199	0
Otu00005	Bacteria;Firmicutes;Clostridia;Clostridiales;Lachnospiraceae;Roseburia	176	366	201	426	343	1351	8882	2839	6220	1044	0	0	905	493	1183	1526	52	393	238	1393	24	0	97	69	169	0	693	152	400	2551	307	0	4200	1054	2215	84	654	109	26	87	36	360
Otu00006	Bacteria;Firmicutes;Clostridia;Clostridiales;Ruminococcaceae;Faecalibacterium	1492	728	1781	195	740	280	1049	929	760	499	38	16	1586	541	238	1103	699	950	225	1790	799	304	266	44	193	4	219	399	255	111	227	0	2181	1731	7832	31	780	985	244	110	4180	2973
Otu00007	Bacteria;Fusobacteria;Fusobacteriia;Fusobacteriales;Fusobacteriaceae;Fusobacterium	7	0	0	0	115	0	0	0	360	0	3	0	78	11	0	0	10	26	1	0	0	1645	0	3755	0	5652	2298	0	0	9	0	8903	30	0	0	0	0	0	43	939	0	0
Otu00008	Bacteria;Proteobacteria;Gammaproteobacteria;Enterobacteriales;Enterobacteriaceae;Escherichia/Shigella	19	0	6	2	12	75	40	0	16	1016	145	1490	26	5	0	29	1460	0	6	9	45	9412	4	3332	3	451	100	19	85	209	4508	478	7	105	8	1	154	15	3	105	36	3
Otu00009	Bacteria;Bacteroidetes;Bacteroidia;Bacteroidales;Prevotellaceae;Prevotella	3	1	248	110	321	0	0	0	142	130	0	0	735	272	170	67	700	762	0	0	176	0	0	286	410	0	1699	0	0	0	128	0	0	63	0	114	0	1261	66	80	0	12764
Otu00010	Bacteria;Firmicutes;Bacilli;Lactobacillales;Streptococcaceae;Streptococcus	2	277	1	42	5	168	7	69	419	9	0	0	14	1	6	1	3	960	692	0	0	0	16	50	24	1	24	9	67	297	10	37	17205	25	62	85	7	7	11	6	5	47
Otu00011	Bacteria;Firmicutes;Clostridia;Clostridiales;Lachnospiraceae;Lachnospiracea_incertae_sedis	2740	373	401	115	368	2107	1931	551	443	210	37	0	167	295	549	359	7	130	83	459	0	0	288	217	202	0	653	136	148	52	184	0	860	214	1924	3	312	95	0	200	1137	127
Otu00012	Bacteria;Firmicutes;Negativicutes;Selenomonadales;Veillonellaceae;Megamonas	0	0	301	32	0	0	0	0	0	0	1	0	0	0	83	145	1096	5	13	0	0	0	0	760	0	0	0	1302	0	0	28	0	0	81	0	11321	0	0	1238	912	0	0
Otu00013	Bacteria;Bacteroidetes;Bacteroidia;Bacteroidales;Bacteroidaceae;Bacteroides	1	0	90	0	0	0	0	0	4	0	0	0	1	0	34	0	0	10	96	1346	4832	0	330	419	63	941	270	958	5235	0	0	0	0	552	0	225	0	0	0	759	417	0
Otu00014	Bacteria;Bacteroidetes;Bacteroidia;Bacteroidales;Prevotellaceae;Alloprevotella	0	0	0	0	0	0	0	1	0	0	0	0	0	0	0	0	0	0	0	0	0	0	0	0	0	0	0	0	0	0	0	0	0	0	0	0	13681	0	0	0	0	0
Otu00015	Bacteria;Bacteroidetes;Bacteroidia;Bacteroidales;Rikenellaceae;Alistipes	2	11	0	0	2	145	0	335	3	0	523	11204	0	4	1	8	2	0	676	12	0	0	0	0	3	0	1	0	0	0	0	0	8	187	0	1	4	0	0	1	5	0
Otu00016	Bacteria;Actinobacteria;Actinobacteria;Bifidobacteriales;Bifidobacteriaceae;Bifidobacterium	896	29	43	7	8	246	2	83	0	0	41	3176	25	1	0	119	0	7	5509	427	274	0	0	1	2	14	0	1	741	250	0	0	72	192	159	27	52	10	4	107	352	0
Otu00017	Bacteria;Firmicutes;Clostridia;Clostridiales;Lachnospiraceae;Blautia	2024	209	114	65	751	106	188	420	383	196	71	857	50	901	311	176	114	90	547	213	1658	0	104	36	27	10	213	38	154	120	61	353	293	291	325	18	174	95	86	64	119	77
Otu00018	Bacteria;Firmicutes;Clostridia;Clostridiales;Ruminococcaceae;Ruminococcus	0	0	0	4	182	1428	0	1920	141	0	4777	0	0	2	362	0	27	0	1789	595	0	0	0	0	0	0	1	0	0	2	3	0	0	0	0	0	1	0	94	0	0	0
Otu00019	Bacteria;Firmicutes;Negativicutes;Selenomonadales;Veillonellaceae;Dialister	32	0	0	0	0	0	0	97	0	0	0	0	0	0	0	0	0	0	0	0	0	0	2477	290	675	0	0	0	985	1437	835	0	0	2153	0	219	1015	482	0	180	332	0
Otu00020	Bacteria;Firmicutes;Clostridia;Clostridiales;Ruminococcaceae;Gemmiger	1883	538	402	98	133	1382	0	476	181	117	29	0	184	186	168	497	319	83	568	263	1329	1	15	181	20	0	55	31	238	199	30	0	38	316	441	24	61	29	29	10	0	38
Otu00021	Bacteria;Firmicutes;Clostridia;Clostridiales;Lachnospiraceae;Roseburia	328	156	806	284	247	0	191	239	874	445	0	0	223	57	281	280	303	211	0	185	16	0	170	21	105	1	1	0	15	19	19	0	14	220	119	3	227	89	2	24	3375	782
Otu00022	Bacteria;Firmicutes;Erysipelotrichia;Erysipelotrichales;Erysipelotrichaceae;Clostridium XVIII	3282	82	59	28	36	178	166	130	129	109	148	241	0	19	117	347	91	121	907	34	886	1	9	6	7	0	861	19	27	380	6	192	5	651	252	0	38	1	2	89	67	12
Otu00023	Bacteria;Bacteroidetes;Bacteroidia;Bacteroidales;Bacteroidaceae;Bacteroides	0	0	34	3	14	1838	2005	457	187	0	1	0	1	0	122	95	0	3	0	22	73	289	8	23	25	56	4	25	341	2134	25	976	41	9	405	12	32	0	24	15	88	24
Otu00024	Bacteria;Firmicutes;Clostridia;Clostridiales;Lachnospiraceae;Blautia	515	286	193	103	414	399	16	1609	290	190	22	190	97	514	360	196	123	310	601	354	1188	0	25	61	5	1	52	129	43	7	46	0	186	514	135	0	18	7	14	7	26	12
Otu00025	Bacteria;Firmicutes;Negativicutes;Selenomonadales;Acidaminococcaceae;Phascolarctobacterium	83	40	0	0	0	2079	257	347	0	0	0	620	0	1	0	0	0	0	593	1	0	0	0	38	8	33	2	354	63	5	5	2911	0	4	539	0	123	44	0	1	0	793
Otu00026	Bacteria;Bacteroidetes;Bacteroidia;Bacteroidales;Prevotellaceae;Prevotella	0	787	58	1371	559	0	0	0	31	425	0	0	378	583	933	76	379	51	0	0	35	1	0	120	43	0	210	0	0	0	1016	0	0	1	0	0	0	1030	796	5	0	21
Otu00027	Bacteria;Firmicutes;Clostridia;Clostridiales;Lachnospiraceae;Lachnospiracea_incertae_sedis	0	250	12	206	168	74	0	1354	630	332	218	240	46	47	668	1680	77	655	65	36	0	0	1	33	40	0	69	0	17	130	103	0	446	38	638	0	96	22	0	0	0	424
Otu00028	Bacteria;Verrucomicrobia;Verrucomicrobiae;Verrucomicrobiales;Verrucomicrobiaceae;Akkermansia	1	11	2	0	0	5	0	4	0	25	7496	7	0	0	0	15	0	0	0	0	0	0	0	0	0	0	0	0	0	0	0	0	0	0	0	0	69	2	0	0	0	0
Otu00029	Bacteria;Bacteroidetes;Bacteroidia;Bacteroidales;Bacteroidaceae;Bacteroides	151	19	8	1	10	2522	15	558	28	10	208	0	0	10	8	48	0	4	2255	65	62	153	1	15	12	3	2	90	120	159	7	103	58	448	116	2	63	4	4	1	193	33
Otu00030	Bacteria;Firmicutes;Clostridia;Clostridiales;Ruminococcaceae;Gemmiger	202	171	128	19	91	375	19	321	33	40	64	0	67	32	144	285	99	0	0	188	0	0	8	76	32	1	4	0	345	69	62	0	176	2675	910	28	29	26	16	7	27	198
Otu00031	Bacteria;Bacteroidetes;Bacteroidia;Bacteroidales;Bacteroidaceae;Bacteroides	0	1	0	0	0	122	0	0	279	0	0	0	3	0	49	14	0	51	0	13	1007	0	1	88	0	0	13	0	871	3725	1	0	0	226	0	4	305	0	0	9	0	0
Otu00032	Bacteria;Bacteroidetes;Bacteroidia;Bacteroidales;Bacteroidaceae;Bacteroides	0	0	0	0	0	0	0	0	0	0	0	0	0	0	0	0	0	0	0	0	0	6662	0	0	0	0	0	0	0	45	0	0	0	0	0	0	0	0	0	0	0	0
Otu00033	Bacteria;Firmicutes;Clostridia;Clostridiales;Lachnospiraceae;unclassified_Lachnospiraceae	489	0	53	3	0	69	371	0	160	0	3	7	2	0	4	95	0	8	24	0	807	1093	0	20	0	249	191	33	9	74	0	2614	16	16	1	0	58	5	5	20	83	1
Otu00034	Bacteria;Firmicutes;Clostridia;Clostridiales;Lachnospiraceae;Ruminococcus2	768	6	47	103	69	155	278	146	430	34	188	0	219	245	19	913	36	66	55	138	1562	2	47	12	4	0	99	0	363	48	16	16	71	10	7	16	53	29	68	73	17	14
Otu00035	Bacteria;Firmicutes;Clostridia;Clostridiales;Lachnospiraceae;Fusicatenibacter	590	33	16	46	100	187	587	999	99	82	54	0	6	65	110	223	9	30	629	91	286	0	128	15	7	12	70	0	99	181	60	0	108	723	588	7	20	9	8	39	77	45
Otu00036	Bacteria;Firmicutes;Clostridia;Clostridiales;Lachnospiraceae;Roseburia	6	10	206	60	156	32	67	541	880	132	27	0	770	29	91	98	226	846	11	316	1	1	7	23	8	10	0	0	32	14	9	0	291	276	65	1	181	16	0	2	716	106
Otu00037	Bacteria;Firmicutes;Clostridia;Clostridiales;Lachnospiraceae;unclassified_Lachnospiraceae	191	29	28	27	24	44	1449	123	32	64	8	13	36	71	154	65	188	6	21	64	581	0	189	26	38	0	88	51	197	548	18	118	32	69	277	15	400	21	33	73	623	167
Otu00038	Bacteria;Firmicutes;Clostridia;Clostridiales;Lachnospiraceae;Coprococcus	0	30	1	6	66	55	0	47	2380	0	3	0	118	1	0	339	23	1121	0	255	0	1	0	0	96	0	0	0	0	0	185	0	4	1357	0	0	0	27	0	0	0	0
Otu00039	Bacteria;Firmicutes;Negativicutes;Selenomonadales;Acidaminococcaceae;Phascolarctobacterium	0	0	1193	669	465	0	0	0	70	635	221	0	13	476	274	772	55	167	0	0	373	518	0	0	0	0	0	0	0	3	0	0	26	0	0	0	0	0	98	0	0	0
Otu00040	Bacteria;Proteobacteria;Betaproteobacteria;Burkholderiales;Sutterellaceae;Parasutterella	0	1	7	0	0	37	0	178	0	2	0	186	0	0	1	0	1	0	193	8	232	0	155	4	17	52	0	278	757	1332	3	1845	0	114	406	8	13	16	49	1	8	21
Otu00041	Bacteria;Actinobacteria;Actinobacteria;Bifidobacteriales;Bifidobacteriaceae;Bifidobacterium	156	31	34	10	6	1015	0	73	4	0	3	1238	14	0	8	212	0	8	2464	108	71	0	18	0	2	1	2	1	49	18	0	0	31	244	18	3	1	2	17	14	45	0
Otu00042	Bacteria;Firmicutes;Clostridia;Clostridiales;Clostridiaceae 1;Clostridium sensu stricto	3	11	17	99	747	695	25	48	36	20	281	1255	13	105	0	28	207	1	36	30	0	0	79	2	27	1	1145	14	109	357	0	2	49	140	6	26	3	11	2	1	4	133
Otu00043	Bacteria;Firmicutes;Erysipelotrichia;Erysipelotrichales;Erysipelotrichaceae;Holdemanella	0	343	0	12	120	0	0	0	2076	0	70	0	73	37	1212	102	404	153	0	255	622	0	0	0	0	0	0	0	0	0	29	0	0	0	0	0	0	92	0	20	0	0
Otu00044	Bacteria;Bacteroidetes;Bacteroidia;Bacteroidales;Prevotellaceae;Prevotella	0	0	0	258	126	0	0	0	1551	150	49	0	139	402	0	90	495	128	0	0	0	0	0	0	578	0	0	0	0	0	719	0	771	0	0	0	0	0	0	0	0	0
Otu00045	Bacteria;Firmicutes;Clostridia;Clostridiales;Peptostreptococcaceae;Romboutsia	9	55	54	51	160	377	15	25	87	215	732	1151	88	290	15	138	79	14	45	42	1	5	109	15	14	49	28	1	83	566	0	195	60	204	52	2	184	10	55	15	23	45
Otu00046	Bacteria;Firmicutes;Clostridia;Clostridiales;Lachnospiraceae;Clostridium XlVb	160	0	0	0	0	412	331	0	0	0	0	0	0	0	0	0	0	0	0	139	357	0	0	3	16	20	0	0	10	2599	1	608	91	0	190	0	58	0	35	39	7	0
Otu00047	Bacteria;Firmicutes;Clostridia;Clostridiales;Lachnospiraceae;Clostridium XlVa	32	11	72	377	146	20	2	66	152	527	25	2	122	169	1048	955	182	33	25	118	60	0	7	10	96	1	4	12	3	0	97	0	7	74	115	1	31	63	1	0	35	253
Otu00048	Bacteria;Firmicutes;Clostridia;Clostridiales;Lachnospiraceae;Lachnospiracea_incertae_sedis	0	84	0	50	2165	579	0	98	137	1535	0	0	2	78	0	100	68	0	0	0	0	0	0	0	1	0	0	0	0	0	1	0	0	0	0	0	2	13	0	0	0	0
Otu00049	Bacteria;Firmicutes;Clostridia;Clostridiales;Ruminococcaceae;unclassified_Ruminococcaceae	13	14	21	34	248	261	0	175	207	533	626	230	180	398	45	1448	4	36	301	52	12	0	0	3	10	0	0	0	0	1	11	0	10	0	0	0	2	15	0	0	0	0
Otu00050	Bacteria;Firmicutes;Clostridia;Clostridiales;Ruminococcaceae;Ruminococcus	0	95	164	196	77	0	0	371	39	346	0	0	288	184	326	155	87	5	0	694	0	0	7	57	172	0	0	0	189	7	103	0	48	18	342	0	20	83	304	0	0	324
Otu00051	Bacteria;Firmicutes;Clostridia;Clostridiales;Lachnospiraceae;Clostridium XlVa	187	14	95	54	59	130	443	124	340	153	2	19	34	52	169	50	55	30	99	40	315	64	27	49	14	98	151	50	58	105	60	444	67	171	138	26	173	42	83	25	50	135
Otu00052	Bacteria;Bacteroidetes;Bacteroidia;Bacteroidales;Prevotellaceae;Prevotella	0	0	1	0	0	0	0	0	0	2178	0	0	89	362	474	0	208	0	0	0	0	0	0	0	0	0	0	0	0	0	1	0	0	0	0	0	0	1020	0	0	0	0
Otu00053	Bacteria;Firmicutes;Clostridia;Clostridiales;Lachnospiraceae;Roseburia	19	14	14	55	40	168	844	258	666	65	0	0	109	36	147	145	2	34	26	185	1	0	8	1	10	1	129	19	50	326	24	0	353	38	256	7	73	4	2	5	0	43
Otu00054	Bacteria;Firmicutes;Clostridia;Clostridiales;Lachnospiraceae;unclassified_Lachnospiraceae	0	0	28	0	0	0	0	433	0	0	0	0	0	0	1	0	247	0	0	0	0	0	0	6	0	0	0	0	9	3372	0	0	0	41	0	0	0	9	20	0	0	0
Otu00055	Bacteria;Bacteroidetes;Bacteroidia;Bacteroidales;Bacteroidaceae;Bacteroides	187	6	0	0	1	509	787	453	7	0	11	20	0	1	6	26	0	0	471	4	19	54	0	2	0	0	0	60	23	410	0	430	34	144	336	1	10	0	0	1	51	6
Otu00056	Bacteria;Bacteroidetes;Bacteroidia;Bacteroidales;Prevotellaceae;Prevotella	0	0	0	416	209	0	0	0	361	426	0	0	195	484	0	53	511	156	0	0	0	0	0	0	569	0	0	0	0	0	627	0	0	0	0	0	0	0	0	0	0	0
Otu00057	Bacteria;Bacteroidetes;Bacteroidia;Bacteroidales;Bacteroidaceae;Bacteroides	0	0	0	0	0	0	0	0	0	0	0	0	0	0	0	0	0	0	0	0	0	0	0	0	0	2504	0	0	0	0	0	0	0	0	0	0	0	0	0	0	1499	0
Otu00058	Bacteria;Firmicutes;Negativicutes;Selenomonadales;Veillonellaceae;Megasphaera	0	0	0	0	0	0	0	0	0	0	0	0	489	0	0	0	433	0	1532	770	0	0	0	135	0	0	0	0	0	0	0	0	0	0	0	0	0	250	317	0	0	0
Otu00059	Bacteria;Firmicutes;Clostridia;Clostridiales;Ruminococcaceae;Clostridium IV	0	0	0	0	1341	0	0	194	0	854	807	0	0	342	201	59	0	0	1	8	0	0	0	0	0	0	0	0	0	0	0	0	0	1	0	0	0	5	0	0	0	0
Otu00060	Bacteria;Bacteroidetes;Bacteroidia;Bacteroidales;Prevotellaceae;Alloprevotella	0	0	0	0	0	0	0	0	0	0	0	0	413	182	650	267	1089	0	0	0	0	0	0	0	0	0	0	0	0	0	0	0	0	1063	0	0	0	0	0	0	0	0
Otu00061	Bacteria;Firmicutes;Clostridia;Clostridiales;Lachnospiraceae;Coprococcus	27	68	26	19	196	66	0	113	867	169	35	4	52	83	66	217	87	7	0	67	392	0	59	10	22	0	195	32	162	132	43	0	70	69	39	3	40	19	19	18	0	49
Otu00062	Bacteria;Bacteroidetes;Bacteroidia;Bacteroidales;Bacteroidaceae;Bacteroides	0	0	0	0	0	0	0	0	0	0	0	0	0	0	1	0	0	0	0	722	0	0	72	33	7	327	0	0	1785	0	0	0	0	0	0	0	0	0	0	187	170	0
Otu00063	Bacteria;Bacteroidetes;Bacteroidia;Bacteroidales;Prevotellaceae;Alloprevotella	0	0	0	1112	145	0	0	0	0	621	0	0	0	0	0	0	0	0	0	0	0	0	0	0	0	0	0	0	0	0	1281	0	0	0	0	0	0	0	0	0	0	0
Otu00064	Bacteria;Firmicutes;Clostridia;Clostridiales;Lachnospiraceae;Lachnospiracea_incertae_sedis	471	15	39	60	41	86	0	574	328	395	10	0	50	17	101	19	10	115	63	71	72	0	2	1	1	0	24	11	10	5	13	0	85	222	148	0	9	30	0	0	8	46
Otu00065	Bacteria;Firmicutes;Clostridia;Clostridiales;Lachnospiraceae;unclassified_Lachnospiraceae	451	36	69	10	79	257	600	125	160	52	2	0	31	32	105	75	2	27	10	112	0	0	20	18	16	0	105	19	27	8	25	0	139	27	236	0	28	4	0	15	188	27
Otu00066	Bacteria;Firmicutes;Clostridia;Clostridiales;Lachnospiraceae;unclassified_Lachnospiraceae	114	39	25	76	81	4	174	49	49	78	3	0	52	70	54	68	40	47	50	33	131	0	62	17	8	0	23	0	31	54	36	89	22	128	145	5	31	49	14	13	933	165
Otu00067	Bacteria;Firmicutes;Clostridia;Clostridiales;Lachnospiraceae;Dorea	24	14	108	34	112	87	43	41	98	80	27	11	35	97	80	158	28	15	95	81	421	0	40	26	6	1	93	22	78	84	31	0	17	462	57	15	27	53	249	24	47	21
Otu00068	Bacteria;Bacteroidetes;Bacteroidia;Bacteroidales;Prevotellaceae;Prevotella	0	0	0	219	121	0	0	0	279	204	0	0	117	346	0	32	297	87	0	0	0	0	1	0	386	0	0	0	0	0	466	0	0	0	0	0	0	437	0	0	0	0
Otu00069	Bacteria;Bacteroidetes;Bacteroidia;Bacteroidales;Porphyromonadaceae;Parabacteroides	84	4	8	0	18	174	67	85	49	22	117	549	7	27	54	38	7	3	790	22	79	1	6	9	9	18	0	50	66	49	16	138	5	98	49	2	77	4	4	2	56	50
Otu00070	Bacteria;Bacteroidetes;Bacteroidia;Bacteroidales;Bacteroidaceae;Bacteroides	0	1095	162	0	0	0	0	0	0	0	0	0	0	0	0	0	0	0	0	0	0	0	645	0	114	0	108	0	0	0	19	0	0	0	0	523	0	0	0	0	218	0
Otu00071	Bacteria;Firmicutes;Erysipelotrichia;Erysipelotrichales;Erysipelotrichaceae;Catenibacterium	0	0	0	4	177	0	0	0	0	927	44	0	148	371	0	0	92	23	0	751	0	0	0	0	0	0	0	0	0	0	0	0	250	0	0	0	0	50	26	0	0	0
Otu00072	Bacteria;Bacteroidetes;Bacteroidia;Bacteroidales;Prevotellaceae;Alloprevotella	0	0	0	666	60	0	0	0	0	143	0	0	267	98	349	67	593	0	0	0	0	0	0	0	0	0	0	0	0	0	550	0	0	40	0	0	0	0	0	0	0	0
Otu00073	Bacteria;Proteobacteria;Betaproteobacteria;Burkholderiales;Sutterellaceae;Sutterella	0	0	0	98	275	0	0	0	588	0	1	0	82	327	196	287	84	33	0	0	0	682	0	0	0	0	0	0	0	6	0	0	0	0	0	0	0	0	0	0	0	0
Otu00074	Bacteria;Firmicutes;Negativicutes;Selenomonadales;Veillonellaceae;Megamonas	0	100	85	0	0	0	0	0	0	0	1	0	0	0	99	20	16	9	10	0	0	358	91	157	342	290	252	56	0	5	22	0	49	67	0	84	0	253	209	81	0	0
Otu00075	Bacteria;Bacteroidetes;Bacteroidia;Bacteroidales;Bacteroidaceae;Bacteroides	0	29	0	0	0	0	0	0	0	0	0	0	0	0	5	0	0	0	0	483	0	0	70	29	8	512	0	0	714	0	0	0	0	0	22	0	29	0	1	82	569	0
Otu00076	Bacteria;Firmicutes;Clostridia;Clostridiales;Lachnospiraceae;unclassified_Lachnospiraceae	269	49	37	27	151	60	74	100	277	115	70	3	45	136	109	88	51	14	154	34	302	0	9	11	2	0	11	0	22	0	3	126	25	64	20	1	15	11	4	14	21	8
Otu00077	Bacteria;Firmicutes;Clostridia;Clostridiales;Lachnospiraceae;Lachnospiracea_incertae_sedis	0	22	0	8	11	0	327	693	24	128	33	0	34	12	16	155	5	0	2	14	0	0	2	0	17	7	0	0	0	188	13	148	101	81	4	0	62	13	0	3	393	0
Otu00078	Bacteria;Firmicutes;Clostridia;Clostridiales;Peptostreptococcaceae;unclassified_Peptostreptococcaceae	1	1	7	8	502	678	34	23	166	26	37	340	17	34	0	73	0	2	247	50	1	3	1	3	0	0	1	0	17	0	0	0	2	209	5	3	1	8	1	6	1	1
Otu00079	Bacteria;Bacteroidetes;Bacteroidia;Bacteroidales;Bacteroidaceae;Bacteroides	0	0	0	0	0	0	0	0	0	0	0	0	0	0	2	0	0	0	0	623	0	0	49	24	5	235	0	0	1375	0	0	0	0	0	0	0	0	0	0	110	50	0
Otu00080	Bacteria;Bacteroidetes;Bacteroidia;Bacteroidales;Prevotellaceae;Prevotella	0	408	102	10	70	0	0	0	18	0	0	0	46	27	64	49	3	46	0	0	100	0	21	109	42	0	13	1035	0	0	11	0	0	8	0	14	0	24	28	59	0	145
Otu00081	Bacteria;Firmicutes;Clostridia;Clostridiales;Ruminococcaceae;Clostridium IV	0	1497	0	31	492	14	0	0	48	0	4	0	162	0	0	39	22	0	14	0	0	0	4	0	4	0	0	0	0	0	46	0	1	2	0	0	5	17	0	0	0	0
Otu00082	Bacteria;Firmicutes;Clostridia;Clostridiales;Lachnospiraceae;Blautia	91	14	12	13	75	22	16	208	39	145	7	0	8	111	153	9	22	10	51	77	191	0	54	22	17	0	38	23	72	59	114	26	10	140	134	7	76	41	21	24	16	217
Otu00083	Bacteria;Bacteroidetes;Bacteroidia;Bacteroidales;Prevotellaceae;Prevotella	0	18	26	141	230	0	0	0	3	54	0	0	0	25	159	31	1	42	0	0	47	0	36	526	2	0	0	62	0	0	423	0	0	0	0	1	0	298	56	1	0	189
Otu00084	Bacteria;Bacteroidetes;Bacteroidia;Bacteroidales;Prevotellaceae;Prevotella	0	2	442	6	3	0	0	0	0	5	0	0	761	32	176	11	697	0	0	0	0	0	0	0	0	0	0	0	0	0	1	0	0	0	0	0	0	61	107	0	0	0
Otu00085	Bacteria;Firmicutes;Clostridia;Clostridiales;unclassified_Clostridiales;	0	0	0	0	0	652	0	0	0	0	1646	0	0	0	0	0	0	0	0	0	0	0	0	0	0	0	0	0	0	0	0	0	0	0	0	0	0	0	0	0	0	0
Otu00086	Bacteria;Bacteroidetes;Bacteroidia;Bacteroidales;Prevotellaceae;Prevotella	0	494	127	6	40	0	0	0	14	0	0	0	16	21	32	50	4	21	0	0	64	0	156	45	88	0	55	629	0	0	11	0	0	14	0	210	0	3	8	41	0	109
Otu00087	Bacteria;Bacteroidetes;Bacteroidia;Bacteroidales;Bacteroidaceae;Bacteroides	281	13	1	0	0	220	260	248	6	0	8	74	0	0	2	14	0	0	356	4	14	25	0	1	0	1	0	43	10	131	0	240	11	84	166	0	8	0	0	0	24	2
Otu00088	Bacteria;Firmicutes;Clostridia;Clostridiales;Lachnospiraceae;Clostridium XlVa	0	19	41	35	39	28	202	65	26	54	0	1	13	189	84	74	28	15	32	34	115	0	43	16	8	0	105	18	129	150	13	35	33	72	181	4	61	18	14	13	0	182
Otu00089	Bacteria;Firmicutes;Negativicutes;Selenomonadales;Veillonellaceae;Dialister	0	2142	0	0	0	0	0	0	0	0	0	0	0	0	0	0	0	0	0	0	0	0	0	0	0	0	0	0	0	0	0	0	0	0	0	0	0	0	0	0	0	0
Otu00090	Bacteria;Firmicutes;Clostridia;Clostridiales;Lachnospiraceae;Anaerostipes	21	17	14	0	12	33	256	76	28	4	17	84	0	1	20	47	0	5	143	23	30	0	39	2	1	1	37	0	32	789	8	71	14	21	146	1	28	4	7	10	26	69
Otu00091	Bacteria;Actinobacteria;Actinobacteria;Coriobacteriales;Coriobacteriaceae;Collinsella	168	57	22	6	9	66	0	0	23	22	144	0	26	14	221	39	16	13	285	44	217	0	23	4	3	2	16	28	18	10	8	6	7	176	29	12	25	68	18	201	14	65
Otu00092	Bacteria;Firmicutes;Erysipelotrichia;Erysipelotrichales;Erysipelotrichaceae;Holdemanella	0	0	0	18	123	0	0	0	0	0	1025	0	148	236	34	314	120	0	0	6	0	0	16	13	0	0	0	0	0	0	0	0	19	0	0	0	14	14	0	0	0	0
Otu00093	Bacteria;Bacteroidetes;Bacteroidia;Bacteroidales;Bacteroidaceae;Bacteroides	61	120	5	0	4	185	12	54	8	0	0	880	1	7	4	78	1	3	374	8	30	0	4	1	1	4	1	4	29	0	4	27	6	23	20	0	3	0	3	0	79	15
Otu00094	Bacteria;Firmicutes;Clostridia;Clostridiales;Lachnospiraceae;Blautia	462	12	15	15	149	10	69	75	108	15	6	120	3	169	81	50	24	12	72	38	100	0	5	2	1	2	39	0	17	30	3	35	73	14	57	0	26	7	3	4	42	17
Otu00095	Bacteria;Bacteroidetes;Bacteroidia;Bacteroidales;Bacteroidaceae;Bacteroides	0	337	54	2	45	0	0	0	15	1	0	0	19	19	62	95	2	23	0	0	81	0	12	67	12	0	0	896	0	0	16	0	0	21	0	3	0	3	26	30	0	128
Otu00096	Bacteria;Firmicutes;Clostridia;Clostridiales;Ruminococcaceae;Butyricicoccus	99	19	46	21	27	0	36	165	36	45	1	4	22	29	98	70	9	30	65	10	22	0	35	30	10	0	34	0	13	244	3	174	63	118	168	6	34	39	25	7	31	52
Otu00097	Bacteria;Firmicutes;Clostridia;Clostridiales;Ruminococcaceae;Ruminococcus	0	0	198	0	224	89	0	0	115	0	0	0	773	0	0	0	54	342	97	0	0	0	0	0	0	0	0	0	0	0	30	0	4	3	0	0	0	6	0	0	0	0
Otu00098	Bacteria;Firmicutes;Clostridia;Clostridiales;Lachnospiraceae;Blautia	59	105	13	21	146	52	11	194	26	111	31	99	13	66	25	30	37	22	28	38	95	0	9	16	26	1	3	6	30	16	47	0	26	290	76	9	14	16	88	7	8	9
Otu00099	Bacteria;Bacteroidetes;Bacteroidia;Bacteroidales;Bacteroidaceae;Bacteroides	0	0	0	0	1	96	736	128	13	0	0	0	0	0	4	15	0	0	0	0	3	15	0	0	2	0	0	8	16	296	0	343	7	0	220	0	1	0	0	0	12	0
Otu00100	Bacteria;Firmicutes;Negativicutes;Selenomonadales;Veillonellaceae;Dialister	0	0	0	0	0	0	0	0	0	0	0	0	807	387	0	0	720	0	0	0	0	0	0	0	0	0	0	0	0	0	0	0	0	0	0	0	0	0	0	0	0	0
Otu00101	Bacteria;Firmicutes;Clostridia;Clostridiales;Lachnospiraceae;Lachnospiracea_incertae_sedis	196	98	9	31	51	108	0	40	65	61	87	0	2	58	88	112	32	0	9	24	221	0	7	18	5	0	98	95	69	78	6	12	67	7	23	4	18	6	28	14	12	13
Otu00102	Bacteria;Firmicutes;Clostridia;Clostridiales;Lachnospiraceae;Lachnospiracea_incertae_sedis	15	23	36	39	34	54	34	88	59	26	6	6	39	71	44	111	36	22	164	19	82	0	47	17	12	2	15	85	31	265	25	6	27	81	90	4	2	33	18	18	41	9
Otu00103	Bacteria;Firmicutes;Clostridia;Clostridiales;Lachnospiraceae;Ruminococcus2	130	31	9	23	35	13	63	3	130	32	10	0	15	35	54	118	22	16	26	53	647	42	15	2	0	0	19	5	32	30	23	3	14	0	61	2	28	35	5	27	3	19
Otu00104	Bacteria;Bacteroidetes;Bacteroidia;Bacteroidales;Porphyromonadaceae;Parabacteroides	38	53	3	3	15	26	56	0	23	14	80	182	2	14	19	193	10	4	0	55	13	129	8	22	19	3	0	0	62	10	0	82	8	39	339	0	17	12	1	3	43	97
Otu00105	Bacteria;Firmicutes;Clostridia;Clostridiales;Ruminococcaceae;Faecalibacterium	84	14	52	8	55	11	31	57	29	39	1	0	88	26	11	40	16	58	7	103	49	8	12	2	8	0	14	0	7	0	4	0	117	101	361	0	24	22	17	3	119	93
Otu00106	Bacteria;Bacteroidetes;Bacteroidia;Bacteroidales;Prevotellaceae;Prevotella	0	0	0	157	0	0	0	0	43	242	0	0	394	61	0	79	670	0	0	0	0	0	0	0	0	0	0	0	0	0	45	0	0	0	0	0	0	0	0	0	0	0
Otu00107	Bacteria;Firmicutes;Clostridia;Clostridiales;Ruminococcaceae;Ruminococcus	0	0	0	2	16	8	0	0	12	40	864	57	0	14	0	63	5	0	1	84	0	0	0	0	19	0	0	0	19	2	13	0	19	354	58	0	23	2	0	4	0	0
Otu00108	Bacteria;Firmicutes;Clostridia;Clostridiales;unclassified_Clostridiales;	8	49	1	49	34	47	0	208	94	147	9	4	74	8	27	38	18	1	456	35	0	0	0	12	13	0	0	0	0	0	4	0	3	207	0	0	2	7	4	1	92	0
Otu00109	Bacteria;Bacteroidetes;Bacteroidia;Bacteroidales;Prevotellaceae;Prevotella	0	124	0	0	0	0	0	0	4	0	0	0	0	0	98	2	0	0	0	0	0	0	450	162	260	0	0	0	0	0	45	0	0	0	0	0	0	11	57	415	0	0
Otu00110	Bacteria;Firmicutes;Clostridia;Clostridiales;Lachnospiraceae;Blautia	78	22	33	21	90	71	2	231	113	58	1	32	22	118	74	49	17	66	80	58	194	0	2	6	3	1	9	21	6	1	1	0	40	61	22	0	1	0	1	0	12	1
Otu00111	Bacteria;Firmicutes;Clostridia;Clostridiales;Lachnospiraceae;unclassified_Lachnospiraceae	11	2	0	0	0	1	246	0	28	0	5	1	0	0	0	0	3	0	14	0	410	89	0	0	0	37	20	0	13	1	0	627	0	7	0	2	12	0	8	0	75	0
Otu00112	Bacteria;Firmicutes;Clostridia;Clostridiales;unclassified_Clostridiales;	0	0	0	0	177	621	0	358	52	0	149	0	0	3	48	6	0	0	0	192	0	0	0	0	0	0	0	0	0	0	0	0	0	0	0	0	0	0	0	0	0	0
Otu00113	Bacteria;Bacteroidetes;Bacteroidia;Bacteroidales;Bacteroidaceae;Bacteroides	0	40	0	0	0	0	0	0	0	0	0	0	0	0	11	0	0	0	0	217	0	0	3	14	1	97	0	0	312	0	0	0	0	0	65	0	301	0	1	30	513	0
Otu00114	Bacteria;Bacteroidetes;Bacteroidia;Bacteroidales;Prevotellaceae;Prevotella	0	501	166	0	0	0	0	0	0	0	0	0	0	0	0	0	0	0	0	0	0	0	294	0	100	0	82	0	0	0	14	0	0	0	0	408	0	0	0	0	0	0
Otu00115	Bacteria;Bacteroidetes;Bacteroidia;Bacteroidales;Prevotellaceae;Prevotella	0	0	0	665	90	0	0	0	0	245	0	0	0	0	0	0	0	0	0	0	0	0	0	0	0	0	0	0	0	0	516	0	0	0	0	0	0	0	0	0	0	0
Otu00116	Bacteria;Firmicutes;Clostridia;Clostridiales;Ruminococcaceae;unclassified_Ruminococcaceae	71	48	68	1	16	43	10	361	6	36	32	1	1	10	47	20	0	30	5	32	177	0	2	23	3	0	1	226	11	5	20	0	32	49	48	0	2	0	2	0	45	20
Otu00117	Bacteria;Firmicutes;Clostridia;Clostridiales;Ruminococcaceae;unclassified_Ruminococcaceae	38	66	0	19	148	89	0	27	60	91	63	0	95	70	69	138	19	11	109	41	0	0	3	12	24	0	0	0	4	2	16	0	2	227	0	0	1	23	0	0	0	31
Otu00118	Bacteria;Firmicutes;Clostridia;Clostridiales;Lachnospiraceae;Lachnospiracea_incertae_sedis	0	23	3	30	17	6	0	230	203	47	13	47	8	8	121	280	6	150	2	1	0	0	0	2	2	0	5	0	3	24	6	0	74	9	82	0	10	8	0	0	0	50
Otu00119	Bacteria;Bacteroidetes;Bacteroidia;Bacteroidales;Prevotellaceae;Prevotella	0	0	0	0	0	0	0	0	0	0	0	0	315	111	401	99	494	0	0	0	0	0	0	0	1	0	0	0	0	0	0	0	0	24	0	0	0	0	0	0	0	0
Otu00120	Bacteria;Bacteroidetes;Bacteroidia;Bacteroidales;Prevotellaceae;Prevotella	0	0	0	0	27	0	0	0	0	430	0	0	16	138	0	0	0	0	0	0	0	0	0	0	0	0	0	0	0	0	0	0	0	0	0	0	0	807	0	0	0	0
Otu00121	Bacteria;Bacteroidetes;Bacteroidia;Bacteroidales;Prevotellaceae;Prevotella	0	0	0	145	61	0	0	0	88	139	0	0	27	75	0	14	92	43	0	0	0	0	0	0	200	0	0	0	0	0	276	0	0	0	0	0	0	254	0	0	0	0
Otu00122	Bacteria;Proteobacteria;Betaproteobacteria;Burkholderiales;Sutterellaceae;Sutterella	0	17	30	0	1	140	323	0	0	0	0	0	1	6	0	0	3	1	0	17	0	0	0	0	0	0	0	0	0	0	0	0	46	0	0	0	0	0	0	51	494	274
Otu00123	Bacteria;Firmicutes;Clostridia;Clostridiales;Ruminococcaceae;Butyricicoccus	41	9	28	30	27	0	86	0	5	47	1	0	2	46	8	109	28	15	10	22	39	0	1	8	7	0	25	0	14	98	20	0	93	0	80	1	0	2	7	5	366	120
Otu00124	Bacteria;Bacteroidetes;Bacteroidia;Bacteroidales;Rikenellaceae;Alistipes	20	84	0	10	0	152	0	234	21	0	20	323	0	1	1	3	1	4	0	83	74	0	0	5	17	0	0	0	0	3	7	0	4	222	0	0	4	0	1	2	0	92
Otu00125	Bacteria;Bacteroidetes;Bacteroidia;Bacteroidales;Bacteroidaceae;Bacteroides	0	0	0	0	0	0	0	0	0	0	0	0	0	0	0	0	0	0	0	0	0	0	0	0	0	877	0	0	0	0	0	0	0	0	0	0	0	0	0	0	470	0
Otu00126	Bacteria;Firmicutes;Clostridia;Clostridiales;Lachnospiraceae;Blautia	0	8	1	8	16	0	166	113	14	15	0	10	0	9	8	8	0	5	8	0	546	100	2	0	2	1	13	4	36	24	0	67	12	0	95	2	15	9	13	9	0	7
Otu00127	Bacteria;Firmicutes;Clostridia;Clostridiales;Lachnospiraceae;Butyrivibrio	0	0	0	0	1052	0	0	0	0	0	0	0	0	293	0	0	0	0	0	0	0	0	0	0	0	0	0	0	0	0	0	0	0	0	0	0	1	0	0	0	0	0
Otu00128	Bacteria;Firmicutes;Clostridia;Clostridiales;Ruminococcaceae;Oscillibacter	64	78	1	25	108	64	0	123	49	194	10	19	24	62	33	136	10	3	5	20	103	0	2	9	19	0	0	0	23	2	68	0	9	5	25	1	13	16	3	1	0	17
Otu00129	Bacteria;Fusobacteria;Fusobacteriia;Fusobacteriales;Fusobacteriaceae;Fusobacterium	0	0	0	0	0	0	0	0	0	0	0	0	0	0	0	0	0	0	0	0	0	1312	0	0	0	0	0	0	0	6	0	0	0	0	0	0	0	0	0	0	0	0
Otu00130	Bacteria;Elusimicrobia;Elusimicrobia;Elusimicrobiales;Elusimicrobiaceae;Elusimicrobium	0	0	0	0	0	0	0	0	0	0	0	0	0	0	0	0	0	0	0	0	0	0	0	0	0	0	0	0	0	0	0	0	0	1290	0	0	0	0	0	0	0	0
Otu00131	Bacteria;Bacteroidetes;Bacteroidia;Bacteroidales;Bacteroidaceae;Bacteroides	453	24	0	0	1	34	37	78	1	0	16	169	0	1	1	37	0	0	97	4	6	0	0	1	0	1	0	53	2	11	1	127	2	28	73	0	5	0	1	0	18	2
Otu00132	Bacteria;Proteobacteria;Deltaproteobacteria;Desulfovibrionales;Desulfovibrionaceae;Desulfovibrio	0	0	78	5	191	0	0	0	0	0	444	0	12	450	0	0	44	0	0	0	0	0	0	0	21	0	0	0	0	0	0	0	10	0	0	0	14	0	0	0	0	0
Otu00133	Bacteria;Firmicutes;Clostridia;Clostridiales;unclassified_Clostridiales;	0	0	0	3	17	100	0	1	102	39	170	26	66	179	103	259	5	5	38	17	0	0	0	0	0	0	0	0	0	0	0	0	0	130	0	0	0	0	0	0	0	0
Otu00134	Bacteria;Proteobacteria;Gammaproteobacteria;Enterobacteriales;Enterobacteriaceae;Klebsiella	0	5	0	0	0	541	0	0	1	10	0	11	2	0	0	0	1	0	0	0	0	0	0	95	12	0	1	0	0	0	532	0	0	2	0	0	6	0	0	18	0	7
Otu00135	Bacteria;Firmicutes;Clostridia;Clostridiales;Lachnospiraceae;Clostridium XlVa	4	0	1	0	0	53	11	4	3	0	5	917	0	1	1	1	0	0	60	1	15	1	0	1	1	11	0	48	0	0	2	63	1	14	10	0	1	0	0	0	7	2
Otu00136	Bacteria;Bacteroidetes;Bacteroidia;Bacteroidales;Bacteroidaceae;Bacteroides	0	0	0	0	0	0	0	0	0	0	0	0	0	0	0	0	0	0	0	3	0	0	0	0	0	725	0	0	0	0	0	0	0	0	0	0	0	0	0	0	508	0
Otu00137	Bacteria;Firmicutes;Clostridia;Clostridiales;Lachnospiraceae;unclassified_Lachnospiraceae	122	70	13	8	54	62	5	202	95	104	0	0	3	8	24	31	20	58	0	37	48	0	3	6	1	0	3	0	0	1	5	0	47	82	73	0	5	1	0	1	2	9
Otu00138	Bacteria;Bacteroidetes;Bacteroidia;Bacteroidales;unclassified_Bacteroidales;	0	0	41	0	0	0	0	0	0	0	0	0	0	0	18	0	0	7	0	0	232	0	101	127	35	0	111	226	0	0	0	0	0	4	0	127	0	0	0	174	0	0
Otu00139	Bacteria;Bacteroidetes;Bacteroidia;Bacteroidales;Bacteroidaceae;Bacteroides	559	17	12	14	5	16	3	11	9	1	7	56	1	2	0	40	1	1	26	37	5	0	0	7	1	0	3	88	12	50	0	68	2	21	51	1	19	2	8	4	8	10
Otu00140	Bacteria;Firmicutes;Negativicutes;Selenomonadales;Veillonellaceae;Mitsuokella	0	0	0	0	0	0	0	0	0	0	0	0	255	23	1	0	347	7	0	0	0	0	544	0	0	0	0	0	0	0	0	0	0	0	0	0	0	0	0	0	0	0
Otu00141	Bacteria;Bacteroidetes;Bacteroidia;Bacteroidales;Prevotellaceae;Prevotella	0	95	0	0	0	0	0	0	11	0	0	0	0	0	57	0	0	0	0	0	0	0	290	142	204	0	0	0	0	0	27	0	0	0	0	0	0	5	43	299	0	0
Otu00142	Bacteria;Bacteroidetes;Bacteroidia;Bacteroidales;Prevotellaceae;Prevotella	0	0	0	0	34	0	0	0	0	67	0	0	3	134	0	0	0	0	0	0	0	0	0	0	0	0	0	0	0	0	0	0	0	0	0	0	0	922	0	0	0	0
Otu00143	Bacteria;Proteobacteria;Deltaproteobacteria;Desulfovibrionales;Desulfovibrionaceae;Bilophila	45	0	6	1	21	79	0	31	17	23	165	264	0	80	7	22	2	1	77	4	152	11	0	6	3	3	0	0	26	1	10	30	2	28	0	2	5	2	0	0	10	15
Otu00144	Bacteria;Firmicutes;Clostridia;Clostridiales;Lachnospiraceae;unclassified_Lachnospiraceae	2	0	0	1	135	6	0	12	4	39	6	0	1	793	10	120	9	0	0	2	0	0	0	1	2	0	0	0	0	0	5	0	0	0	0	0	0	0	0	0	0	0
Otu00145	Bacteria;Bacteroidetes;Bacteroidia;Bacteroidales;Bacteroidaceae;Bacteroides	0	0	0	0	0	17	0	0	12	0	0	0	0	0	8	1	0	1	0	0	122	0	0	8	0	0	0	0	77	809	0	0	0	42	0	0	35	0	0	1	0	0
Otu00146	Bacteria;Firmicutes;Clostridia;Clostridiales;Lachnospiraceae;unclassified_Lachnospiraceae	0	31	10	28	14	113	0	114	64	13	2	0	3	5	90	8	27	10	41	9	329	14	5	3	0	0	26	0	2	1	1	0	17	31	78	0	15	8	0	0	0	18
Otu00147	Bacteria;Firmicutes;Clostridia;Clostridiales;Lachnospiraceae;Ruminococcus2	60	8	36	0	0	78	6	24	99	0	176	12	4	0	1	0	0	5	149	52	1	33	2	3	3	10	1	29	89	6	0	0	6	1	0	0	0	1	3	0	221	3
Otu00148	Bacteria;Firmicutes;Clostridia;Clostridiales;Ruminococcaceae;unclassified_Ruminococcaceae	0	0	0	13	131	84	0	74	35	20	194	0	1	167	25	267	0	0	16	23	0	0	0	0	0	0	0	0	0	0	2	0	1	36	0	0	0	1	0	0	0	0
Otu00149	Bacteria;Bacteroidetes;Bacteroidia;Bacteroidales;Porphyromonadaceae;unclassified_Porphyromonadaceae	0	40	0	85	152	0	0	0	0	76	4	0	6	256	0	371	11	17	0	0	0	0	0	0	0	0	0	0	0	0	0	0	0	0	0	0	0	46	0	0	0	0
Otu00150	Bacteria;Bacteroidetes;Bacteroidia;Bacteroidales;Prevotellaceae;Prevotella	0	0	0	122	35	0	0	0	15	82	0	0	60	104	0	8	102	57	0	0	0	0	0	0	157	0	0	0	0	0	149	0	0	0	0	0	0	172	0	0	0	0
Otu00151	Bacteria;Firmicutes;Erysipelotrichia;Erysipelotrichales;Erysipelotrichaceae;Turicibacter	1	8	0	0	149	127	2	0	8	7	179	322	3	39	1	28	5	2	39	14	1	0	17	0	0	1	1	0	14	3	0	0	24	47	0	0	0	7	1	2	0	0
Otu00152	Bacteria;Fusobacteria;Fusobacteriia;Fusobacteriales;Fusobacteriaceae;unclassified_Fusobacteriaceae	0	0	0	0	0	0	0	0	0	0	0	0	0	0	0	0	0	0	0	0	0	1035	0	0	0	0	0	0	0	8	0	0	0	0	0	0	0	0	0	0	0	0
Otu00153	Bacteria;Firmicutes;Clostridia;Clostridiales;Ruminococcaceae;Clostridium IV	0	24	5	4	36	215	0	0	30	18	23	13	8	17	0	5	0	8	536	27	20	0	0	0	1	0	0	0	5	0	1	0	2	26	0	0	1	1	0	0	0	1
Otu00154	Bacteria;Firmicutes;Clostridia;Clostridiales;Ruminococcaceae;unclassified_Ruminococcaceae	0	0	3	4	31	357	0	32	25	114	147	0	24	80	12	109	1	1	14	45	0	0	0	1	5	0	0	0	0	0	0	0	1	0	0	0	0	2	0	0	0	0
Otu00155	Bacteria;Bacteroidetes;Bacteroidia;Bacteroidales;Bacteroidaceae;Bacteroides	227	63	22	0	0	19	24	59	32	0	1	0	1	1	1	26	0	11	117	3	52	0	0	6	25	1	1	0	7	0	0	188	5	6	39	1	0	13	1	0	9	17
Otu00156	Bacteria;Firmicutes;Clostridia;Clostridiales;Lachnospiraceae;unclassified_Lachnospiraceae	11	5	9	2	0	110	115	118	125	14	0	0	3	5	55	20	0	20	1	36	0	0	2	2	8	0	33	1	1	16	2	0	203	9	29	0	8	2	0	0	2	8
Otu00157	Bacteria;Bacteroidetes;Bacteroidia;Bacteroidales;Bacteroidaceae;Bacteroides	528	6	0	0	0	10	41	44	0	0	1	13	0	0	0	14	0	0	25	4	8	0	0	1	0	0	0	46	2	26	0	109	1	9	66	0	5	0	0	0	4	5
Otu00158	Bacteria;Bacteroidetes;Bacteroidia;Bacteroidales;Prevotellaceae;Prevotella	0	0	41	7	4	0	0	0	0	1	0	0	2	2	10	0	4	8	0	0	157	0	48	98	24	0	81	207	0	0	0	0	0	12	0	104	0	0	0	148	0	0
Otu00159	Bacteria;Firmicutes;Negativicutes;Selenomonadales;Acidaminococcaceae;Phascolarctobacterium	9	8	0	0	0	297	47	55	0	0	0	57	0	0	0	0	0	0	96	0	0	0	0	12	1	6	0	85	5	0	0	98	0	0	78	0	2	12	0	0	0	89
Otu00160	Bacteria;Firmicutes;Clostridia;Clostridiales;Lachnospiraceae;Clostridium XlVa	30	4	0	8	6	8	278	27	1	7	1	3	5	8	40	2	26	1	1	7	75	0	19	0	1	0	16	0	26	121	5	12	8	7	33	0	45	3	5	14	69	29
Otu00161	Bacteria;Bacteroidetes;Bacteroidia;Bacteroidales;Bacteroidaceae;Bacteroides	0	0	0	0	0	0	0	0	1	0	0	0	0	0	2	0	0	0	0	221	0	0	32	20	10	110	0	0	464	0	0	0	0	0	0	0	0	0	0	74	17	0
Otu00162	Bacteria;Bacteroidetes;Bacteroidia;Bacteroidales;Porphyromonadaceae;Barnesiella	0	0	0	0	4	286	0	139	42	0	55	26	1	5	45	7	0	0	0	50	57	0	1	2	4	1	0	0	24	2	0	0	3	168	0	1	24	0	0	0	0	0
Otu00163	Bacteria;Firmicutes;Clostridia;Clostridiales;Lachnospiraceae;unclassified_Lachnospiraceae	0	181	0	37	0	126	0	0	16	0	0	0	0	0	0	0	0	16	0	55	0	0	17	0	0	0	0	1	5	105	0	0	63	0	315	0	0	8	0	0	0	0
Otu00164	Bacteria;Firmicutes;Clostridia;Clostridiales;Ruminococcaceae;unclassified_Ruminococcaceae	224	46	75	6	10	30	0	34	11	5	0	0	30	14	9	44	43	12	20	39	88	0	1	5	1	0	1	4	12	1	3	0	6	25	125	1	1	7	3	0	0	7
Otu00165	Bacteria;Firmicutes;Clostridia;Clostridiales;Lachnospiraceae;Blautia	1	1	0	0	0	0	0	0	0	0	0	2	0	0	0	0	0	0	0	0	11	913	0	0	0	2	0	0	0	8	0	2	0	0	0	0	0	0	0	0	0	0
Otu00166	Bacteria;Firmicutes;Clostridia;Clostridiales;Lachnospiraceae;unclassified_Lachnospiraceae	2	9	0	0	4	0	0	4	12	270	9	1	1	0	1	112	276	1	2	202	0	0	0	0	8	0	0	2	0	0	2	0	0	5	1	0	0	5	0	0	0	0
Otu00167	Bacteria;Bacteroidetes;Bacteroidia;Bacteroidales;Prevotellaceae;Prevotella	0	18	4	7	7	0	0	0	0	19	0	0	30	7	6	1	20	21	0	0	0	0	0	55	10	0	4	0	0	0	21	0	0	0	0	0	0	34	54	71	0	539
Otu00168	Bacteria;Bacteroidetes;Bacteroidia;Bacteroidales;Bacteroidaceae;Bacteroides	0	0	2	0	0	0	0	0	1	0	0	0	0	0	2	0	0	0	14	48	279	0	0	7	0	12	0	296	167	0	0	0	0	59	0	0	0	0	0	23	13	0
Otu00169	Bacteria;Firmicutes;Clostridia;Clostridiales;Lachnospiraceae;unclassified_Lachnospiraceae	35	0	1	0	0	87	102	0	0	0	0	0	0	0	0	0	0	0	0	30	68	0	0	0	0	4	0	0	1	473	0	50	18	0	33	0	9	0	3	3	3	0
Otu00170	Bacteria;Bacteroidetes;Bacteroidia;Bacteroidales;Bacteroidaceae;Bacteroides	0	18	0	0	0	0	0	0	2	0	0	0	0	0	4	0	0	0	0	121	0	0	2	10	0	37	0	0	145	0	0	0	0	0	49	0	242	0	0	16	270	0
Otu00171	Bacteria;Bacteroidetes;Bacteroidia;Bacteroidales;Bacteroidaceae;Bacteroides	26	22	0	0	0	224	64	78	7	0	24	23	0	0	1	10	0	1	253	1	18	0	0	1	2	7	0	0	26	4	1	40	1	27	14	1	13	0	0	0	2	21
Otu00172	Bacteria;Bacteroidetes;Bacteroidia;Bacteroidales;Bacteroidaceae;Bacteroides	0	0	1	0	0	0	0	0	0	0	0	0	0	0	3	0	0	0	6	49	291	0	3	15	2	27	2	172	145	0	0	0	0	77	0	0	0	0	0	17	96	0
Otu00173	Bacteria;Firmicutes;Clostridia;Clostridiales;unclassified_Clostridiales;	0	0	0	0	44	0	0	240	0	0	448	0	0	32	15	120	0	0	0	0	0	0	0	0	0	0	0	0	0	0	0	0	0	0	0	0	0	0	0	0	0	0
Otu00174	Bacteria;Bacteroidetes;Bacteroidia;Bacteroidales;Prevotellaceae;Alloprevotella	0	0	0	0	0	0	0	0	0	0	0	0	0	0	0	0	0	0	0	0	0	0	0	0	0	0	0	0	0	0	0	0	0	0	0	0	893	0	0	0	0	0
Otu00175	Bacteria;Firmicutes;Clostridia;Clostridiales;Lachnospiraceae;unclassified_Lachnospiraceae	1	14	15	17	31	17	11	21	110	119	0	1	8	20	9	22	12	11	0	14	0	0	15	2	0	0	20	0	14	10	18	1	17	57	57	2	13	6	4	3	0	200
Otu00176	Bacteria;Firmicutes;Clostridia;Clostridiales;Lachnospiraceae;unclassified_Lachnospiraceae	5	2	2	11	10	20	228	67	138	12	0	0	17	17	51	51	0	6	5	32	3	0	3	1	2	0	13	4	17	22	9	0	48	7	66	1	8	0	0	0	0	7
Otu00177	Bacteria;Firmicutes;Clostridia;Clostridiales;Lachnospiraceae;unclassified_Lachnospiraceae	18	7	5	6	6	51	299	52	56	6	0	0	25	6	24	11	0	15	2	36	0	0	1	0	6	0	17	0	8	5	4	0	101	5	79	0	9	1	0	2	13	8
Otu00178	Bacteria;Firmicutes;Clostridia;Clostridiales;Lachnospiraceae;Coprococcus	0	4	0	0	14	0	0	5	410	0	0	0	16	0	0	51	6	70	0	40	0	0	0	0	8	0	0	0	0	0	32	0	0	215	0	0	0	3	0	0	0	0
Otu00179	Bacteria;Bacteroidetes;Bacteroidia;Bacteroidales;Bacteroidaceae;Bacteroides	0	54	0	0	0	0	0	0	8	0	0	0	0	0	65	0	0	0	0	0	0	0	343	81	103	0	0	0	0	0	16	0	0	0	0	0	0	0	20	168	0	0
Otu00180	Bacteria;Firmicutes;unclassified_Firmicutes;;;	5	10	18	9	23	53	0	44	55	90	179	0	10	75	41	101	4	3	43	7	0	0	0	5	1	0	0	0	0	0	2	0	4	38	7	0	8	6	0	0	0	6
Otu00181	Bacteria;Firmicutes;Clostridia;Clostridiales;Ruminococcaceae;Ruminococcus	0	0	0	0	231	0	0	0	0	0	0	0	0	556	0	59	0	0	0	0	0	0	0	0	0	0	0	0	0	0	0	0	0	0	0	0	0	0	0	0	0	0
Otu00182	Bacteria;Bacteroidetes;Bacteroidia;Bacteroidales;Bacteroidaceae;Bacteroides	0	39	0	0	0	0	0	0	9	0	0	0	0	0	39	1	0	0	0	39	0	0	185	54	84	17	0	0	91	0	17	0	0	0	1	0	17	5	9	205	26	0
Otu00183	Bacteria;Bacteroidetes;Bacteroidia;Bacteroidales;Prevotellaceae;Prevotella	0	0	0	175	24	0	0	0	0	35	0	0	61	36	88	16	104	0	0	0	0	0	0	0	0	0	0	0	0	0	149	0	0	4	0	0	0	0	0	123	0	0
Otu00184	Bacteria;Firmicutes;Bacilli;Lactobacillales;Lactobacillaceae;Lactobacillus	0	0	10	0	0	0	0	0	0	0	0	0	44	0	0	207	0	0	0	0	0	0	0	0	0	0	0	0	0	0	0	0	173	344	0	0	0	15	18	0	0	0
Otu00185	Bacteria;Bacteroidetes;Bacteroidia;Bacteroidales;Bacteroidaceae;Bacteroides	0	92	13	1	22	0	0	0	3	0	0	0	4	3	15	48	0	5	0	0	51	0	0	20	3	0	2	394	0	5	2	0	12	13	0	2	0	3	9	12	0	60
Otu00186	Bacteria;Firmicutes;Clostridia;Clostridiales;Ruminococcaceae;unclassified_Ruminococcaceae	140	54	92	10	8	18	0	25	10	7	0	0	14	6	7	41	28	12	10	30	48	0	1	2	2	0	3	1	6	0	4	0	19	50	112	2	1	4	1	0	2	17
Otu00187	Bacteria;Bacteroidetes;Bacteroidia;Bacteroidales;Bacteroidaceae;Bacteroides	0	0	23	0	0	0	0	0	0	0	0	0	0	0	4	0	0	1	0	0	214	0	80	76	5	0	51	167	0	0	0	0	0	1	0	60	0	0	0	99	0	0
Otu00188	Bacteria;Firmicutes;Clostridia;Clostridiales;Ruminococcaceae;Faecalibacterium	16	9	20	3	3	16	4	2	5	3	0	0	2	2	0	9	7	0	0	9	0	0	3	3	1	0	0	0	6	1	5	0	37	306	240	0	1	2	1	0	11	52
Otu00189	Bacteria;Firmicutes;Bacilli;Lactobacillales;Streptococcaceae;Streptococcus	20	38	0	17	5	14	2	19	61	4	3	14	8	2	3	15	17	119	20	2	11	1	2	11	0	2	8	5	26	5	2	17	252	1	28	1	5	0	5	3	3	7
Otu00190	Bacteria;Firmicutes;Clostridia;Clostridiales;Lachnospiraceae;unclassified_Lachnospiraceae	58	30	11	5	10	56	62	43	40	15	0	0	7	10	55	48	0	11	1	10	0	0	8	3	8	0	13	9	2	0	20	0	42	7	83	0	16	2	0	4	69	8
Otu00191	Bacteria;Firmicutes;Clostridia;Clostridiales;Ruminococcaceae;unclassified_Ruminococcaceae	0	1	4	1	1	28	0	2	2	0	189	474	1	2	1	1	1	0	31	0	1	4	0	0	1	0	0	0	0	0	0	0	0	17	0	0	0	0	0	0	0	0
Otu00192	Bacteria;Firmicutes;Clostridia;Clostridiales;Clostridiaceae 1;Clostridium sensu stricto	0	21	54	64	86	23	88	32	12	14	63	37	1	4	1	0	6	0	1	28	0	0	15	20	0	0	7	3	26	0	0	0	5	8	3	8	118	1	9	0	1	1
Otu00193	Bacteria;Firmicutes;Clostridia;Clostridiales;Lachnospiraceae;unclassified_Lachnospiraceae	94	0	0	1	3	12	19	55	30	0	80	0	0	7	36	21	0	11	0	18	188	0	9	7	0	0	31	0	56	7	0	0	29	2	9	4	3	1	0	1	1	20
Otu00194	Bacteria;Bacteroidetes;Bacteroidia;Bacteroidales;Prevotellaceae;Prevotella	0	0	0	0	0	0	0	0	0	266	0	0	149	106	0	0	207	0	0	0	0	0	0	0	0	0	0	0	0	0	0	0	0	0	0	0	0	12	0	0	0	0
Otu00195	Bacteria;Bacteroidetes;Bacteroidia;Bacteroidales;Prevotellaceae;Prevotella	0	0	0	50	26	0	0	0	102	30	0	0	30	83	0	18	86	36	0	0	0	0	0	0	122	0	0	0	0	0	150	0	0	0	0	0	0	0	0	0	0	0
Otu00196	Bacteria;Firmicutes;Clostridia;Clostridiales;Lachnospiraceae;Blautia	4	13	8	15	67	50	0	19	68	79	59	1	17	22	74	28	6	1	3	38	42	0	0	1	4	0	0	4	1	2	7	0	5	65	3	2	5	3	11	3	0	2
Otu00197	Bacteria;Firmicutes;Negativicutes;Selenomonadales;Veillonellaceae;Dialister	0	0	0	0	0	0	0	13	0	0	0	0	0	0	0	0	0	0	0	0	0	0	176	39	68	0	0	0	32	86	26	0	0	100	0	47	30	46	0	38	22	0
Otu00198	Bacteria;Bacteroidetes;Bacteroidia;Bacteroidales;Bacteroidaceae;Bacteroides	0	0	0	0	0	14	0	0	8	0	0	0	0	0	2	0	0	1	0	1	98	0	0	2	0	0	0	0	36	496	0	0	0	40	0	0	22	0	0	1	0	0
Otu00199	Bacteria;Firmicutes;Clostridia;Clostridiales;Lachnospiraceae;Coprococcus	0	0	0	43	3	34	0	289	0	0	0	0	8	60	163	11	78	0	0	24	0	0	0	0	0	0	0	0	0	0	0	0	0	0	0	0	1	1	0	0	0	0
Otu00200	Bacteria;Bacteroidetes;Bacteroidia;Bacteroidales;Bacteroidaceae;Bacteroides	0	0	0	0	0	55	268	43	1	0	0	0	0	0	2	9	0	0	0	0	2	5	0	0	0	1	0	0	3	125	0	139	3	0	48	0	1	0	1	0	7	0
Otu00201	Bacteria;Bacteroidetes;Bacteroidia;Bacteroidales;Bacteroidaceae;Bacteroides	0	15	0	0	0	0	0	0	2	0	0	0	0	0	6	0	0	0	0	79	0	0	0	5	3	42	0	0	101	0	0	0	0	0	67	0	138	0	1	18	235	0
Otu00202	Bacteria;Firmicutes;Clostridia;Clostridiales;Lachnospiraceae;Clostridium XlVa	106	7	8	11	14	42	158	13	9	13	1	0	8	16	37	12	0	1	1	13	0	0	13	3	9	0	26	7	10	4	7	0	12	18	65	0	12	4	0	5	34	9
Otu00203	Bacteria;Firmicutes;Clostridia;Clostridiales;Lachnospiraceae;unclassified_Lachnospiraceae	0	0	0	0	0	0	0	0	0	0	0	0	0	0	0	0	0	0	0	0	0	247	0	0	0	27	0	5	0	7	0	413	0	0	0	1	0	1	1	0	0	0
Otu00204	Bacteria;Firmicutes;Clostridia;Clostridiales;Lachnospiraceae;unclassified_Lachnospiraceae	3	1	0	18	2	20	231	37	89	23	0	0	7	11	58	21	3	4	4	20	2	0	0	1	3	1	13	3	9	30	4	0	17	11	32	0	5	3	0	1	1	14
Otu00205	Bacteria;Firmicutes;Negativicutes;Selenomonadales;Veillonellaceae;Mitsuokella	0	0	0	0	0	0	0	0	0	0	0	0	39	5	1	0	71	1	0	0	0	0	585	0	0	0	0	0	0	0	0	0	0	0	0	0	0	0	0	0	0	0
Otu00206	Bacteria;Firmicutes;Clostridia;Clostridiales;Ruminococcaceae;Ruminococcus	0	45	0	0	0	11	0	183	12	0	19	0	70	10	0	1	0	0	48	0	0	0	0	3	0	0	0	0	1	2	0	0	44	178	23	0	0	0	0	0	0	37
Otu00207	Bacteria;Firmicutes;Negativicutes;Selenomonadales;Veillonellaceae;Megamonas	0	0	36	8	0	0	0	0	0	0	0	0	0	0	15	24	110	0	4	0	0	0	0	43	0	0	0	66	0	0	11	0	0	15	0	203	0	0	42	91	0	0
Otu00208	Bacteria;Firmicutes;Clostridia;Clostridiales;Lachnospiraceae;Clostridium XlVb	93	34	1	16	41	0	0	19	42	26	5	0	3	58	75	42	4	0	0	0	19	0	0	1	2	0	0	23	4	0	39	0	5	0	47	0	17	11	0	0	0	40
Otu00209	Bacteria;Firmicutes;Clostridia;Clostridiales;Ruminococcaceae;unclassified_Ruminococcaceae	0	0	0	2	63	0	0	43	4	63	314	0	7	63	2	69	1	0	0	26	0	0	0	1	0	0	0	0	0	0	0	0	0	0	0	0	0	1	0	0	0	0
Otu00210	Bacteria;Bacteroidetes;Bacteroidia;Bacteroidales;Prevotellaceae;Prevotella	0	0	0	0	0	0	0	0	0	281	0	0	101	72	0	0	190	0	0	0	0	0	0	0	0	0	0	0	0	0	0	0	0	0	1	0	0	8	0	0	0	0
Otu00211	Bacteria;Bacteroidetes;Bacteroidia;Bacteroidales;Bacteroidaceae;Bacteroides	54	23	2	0	1	0	1	49	3	0	11	87	1	0	5	25	0	4	43	20	39	0	0	11	0	1	3	76	2	3	4	110	2	2	29	1	1	0	0	0	26	10
Otu00212	Bacteria;Bacteroidetes;Bacteroidia;Bacteroidales;Bacteroidaceae;Bacteroides	0	0	0	0	0	20	0	0	12	0	0	0	0	0	1	0	0	0	0	0	9	0	0	0	0	0	0	0	34	571	0	0	0	0	0	0	1	0	0	0	0	0
Otu00213	Bacteria;Firmicutes;Clostridia;Clostridiales;Lachnospiraceae;unclassified_Lachnospiraceae	0	9	1	11	235	103	0	21	16	222	0	0	0	8	1	8	7	0	0	0	0	0	0	0	0	0	0	0	0	0	2	0	0	0	0	0	0	1	0	0	0	1
Otu00214	Bacteria;Bacteroidetes;Bacteroidia;Bacteroidales;Bacteroidaceae;Bacteroides	0	0	0	0	0	0	0	0	0	0	0	0	0	0	1	0	0	0	0	132	0	0	7	2	0	156	0	0	240	0	0	0	0	0	0	0	0	0	0	17	89	0
Otu00215	Bacteria;Bacteroidetes;Bacteroidia;Bacteroidales;Bacteroidaceae;Bacteroides	0	0	0	0	0	53	0	0	24	0	0	0	0	0	4	0	0	0	0	0	12	0	0	0	0	0	0	0	18	505	0	0	0	18	0	0	1	0	0	0	0	0
Otu00216	Bacteria;Firmicutes;Clostridia;Clostridiales;Lachnospiraceae;Coprococcus	32	14	5	9	38	0	1	15	62	34	9	0	4	8	33	30	12	3	11	11	157	0	2	0	2	0	0	9	3	2	16	0	12	59	9	2	5	4	0	8	0	6
Otu00217	Bacteria;Bacteroidetes;Bacteroidia;Bacteroidales;unclassified_Bacteroidales;	0	0	0	0	0	0	0	0	0	0	0	1	0	0	0	0	0	0	0	0	0	0	0	0	0	0	0	0	0	0	0	0	0	0	0	0	0	0	0	626	0	0
Otu00218	Bacteria;Firmicutes;Negativicutes;Selenomonadales;Veillonellaceae;Megamonas	0	17	0	0	0	0	0	0	0	0	0	0	0	0	28	0	0	0	7	0	0	0	0	0	0	0	89	39	0	0	17	0	18	47	0	0	0	0	0	362	0	0
Otu00219	Bacteria;Firmicutes;Negativicutes;Selenomonadales;Veillonellaceae;Megasphaera	0	0	0	0	0	0	0	0	0	0	0	0	104	0	0	0	100	0	191	158	0	0	0	6	0	0	0	0	0	0	0	0	0	0	0	0	0	22	40	0	0	0
Otu00220	Bacteria;Bacteroidetes;Bacteroidia;Bacteroidales;Prevotellaceae;Paraprevotella	0	8	0	6	2	174	21	53	7	4	1	0	2	3	144	6	1	22	0	0	55	0	0	0	6	58	1	0	26	0	2	11	2	0	0	0	0	2	0	2	0	0
Otu00221	Bacteria;Proteobacteria;Betaproteobacteria;Burkholderiales;unclassified_Burkholderiales;	0	34	0	1	21	0	0	0	0	84	5	0	0	354	0	66	0	0	0	0	0	0	0	44	0	0	0	0	0	0	0	0	0	0	0	0	0	0	0	0	0	0
Otu00222	Bacteria;Firmicutes;Negativicutes;Selenomonadales;Veillonellaceae;Megamonas	0	0	0	0	0	0	0	0	0	0	0	0	0	0	0	0	0	0	0	0	0	0	46	87	149	0	0	0	0	0	16	0	0	54	0	117	0	42	0	94	0	0
Otu00223	Bacteria;Fusobacteria;Fusobacteriia;Fusobacteriales;Fusobacteriaceae;Fusobacterium	0	0	0	0	0	0	0	0	0	0	0	0	0	0	0	0	0	0	0	0	0	601	0	0	0	0	0	0	0	0	0	0	0	0	0	0	0	0	0	0	0	0
Otu00224	Bacteria;Fusobacteria;Fusobacteriia;Fusobacteriales;Fusobacteriaceae;Fusobacterium	0	0	0	0	0	0	0	0	0	0	0	0	0	0	0	0	0	0	0	0	0	594	0	0	0	0	0	0	0	1	0	0	0	0	0	0	0	0	0	0	0	0
Otu00225	Bacteria;Bacteroidetes;Bacteroidia;Bacteroidales;Prevotellaceae;Prevotella	0	30	33	7	28	0	0	0	21	5	0	0	0	8	108	34	1	4	0	0	16	0	5	25	47	0	6	79	0	0	33	0	0	8	0	11	0	2	15	6	0	59
Otu00226	Bacteria;Firmicutes;Negativicutes;Selenomonadales;Veillonellaceae;Megamonas	0	0	0	0	0	0	0	0	0	0	0	0	0	0	3	0	0	0	1	0	0	0	0	5	0	0	217	35	0	0	2	0	4	10	0	0	0	0	0	312	0	0
Otu00227	Bacteria;Firmicutes;Clostridia;Clostridiales;Ruminococcaceae;Faecalibacterium	14	4	13	1	7	1	49	17	41	7	0	0	27	4	3	17	6	19	2	34	6	0	2	0	0	0	1	4	3	2	1	0	59	31	76	0	5	3	0	0	84	45
Otu00228	Bacteria;Firmicutes;Clostridia;Clostridiales;Lachnospiraceae;unclassified_Lachnospiraceae	0	10	0	1	136	12	0	263	0	1	0	6	2	4	64	20	0	0	0	25	0	0	0	0	0	0	0	0	0	0	9	0	0	0	0	0	0	1	0	0	32	0
Otu00229	Bacteria;Firmicutes;Clostridia;Clostridiales;Lachnospiraceae;Clostridium XlVa	0	0	0	5	46	18	0	159	0	6	5	262	2	46	10	4	0	0	0	6	0	0	0	2	1	0	0	1	0	0	3	0	1	3	0	0	0	0	0	0	0	0
Otu00230	Bacteria;Firmicutes;Bacilli;Lactobacillales;Streptococcaceae;Streptococcus	1	23	0	3	0	8	0	8	28	0	0	0	1	0	0	0	0	44	25	0	0	0	0	0	0	0	0	0	1	15	1	0	406	2	3	2	0	1	0	0	2	3
Otu00231	Bacteria;Firmicutes;Clostridia;Clostridiales;Lachnospiraceae;unclassified_Lachnospiraceae	29	6	12	10	23	3	22	8	52	6	9	0	14	36	8	43	5	9	3	7	10	0	7	2	8	0	2	0	27	7	5	0	15	34	39	2	11	15	1	4	0	80
Otu00232	Bacteria;Firmicutes;Bacilli;Lactobacillales;Streptococcaceae;Streptococcus	19	13	1	6	1	1	1	14	59	2	1	5	1	1	1	6	13	18	8	0	0	0	2	4	1	0	5	0	1	9	1	6	337	2	16	2	3	0	1	3	1	7
Otu00233	Bacteria;Bacteroidetes;Bacteroidia;Bacteroidales;Bacteroidaceae;Bacteroides	0	1	0	0	0	0	0	0	0	0	0	0	0	0	0	0	0	0	0	122	0	0	0	4	2	167	0	0	101	0	0	0	0	0	0	0	21	0	0	5	147	0
Otu00234	Bacteria;Firmicutes;Clostridia;Clostridiales;Lachnospiraceae;unclassified_Lachnospiraceae	74	3	10	21	7	14	0	92	61	84	0	0	9	5	21	3	3	21	8	10	18	0	1	0	0	0	3	1	1	3	2	0	21	25	29	0	0	3	0	0	4	9
Otu00235	Bacteria;Proteobacteria;Betaproteobacteria;Burkholderiales;unclassified_Burkholderiales;	0	0	0	0	0	0	0	0	0	0	0	0	0	0	0	0	0	0	0	0	0	0	0	0	34	0	0	0	0	238	3	0	0	167	0	0	0	0	79	7	10	0
Otu00236	Bacteria;Bacteroidetes;Bacteroidia;Bacteroidales;Bacteroidaceae;Bacteroides	0	0	0	0	0	21	0	0	2	0	0	0	0	0	3	0	0	2	0	1	148	0	0	5	0	0	1	0	116	208	0	0	0	21	0	0	2	0	0	1	0	0
Otu00237	Bacteria;Bacteroidetes;Bacteroidia;Bacteroidales;Bacteroidaceae;Bacteroides	0	2	0	0	0	0	0	0	1	0	0	0	0	0	3	0	0	0	0	97	0	0	5	1	0	18	0	0	264	0	0	0	0	0	7	0	20	0	0	5	106	0
Otu00238	Bacteria;Firmicutes;Clostridia;Clostridiales;Ruminococcaceae;Oscillibacter	4	3	13	0	3	39	0	15	6	7	24	128	2	11	4	9	7	0	104	5	2	0	0	0	2	0	0	0	3	0	2	0	1	123	0	0	7	0	0	0	0	4
Otu00239	Bacteria;Firmicutes;Erysipelotrichia;Erysipelotrichales;Erysipelotrichaceae;unclassified_Erysipelotrichaceae	141	9	4	3	2	14	11	9	7	6	10	21	0	5	5	13	6	11	61	5	48	0	1	1	0	0	22	0	3	27	1	3	3	47	10	0	1	0	1	5	3	0
Otu00240	Bacteria;Firmicutes;Clostridia;Clostridiales;Ruminococcaceae;unclassified_Ruminococcaceae	116	16	12	10	2	63	0	38	28	8	0	0	3	1	5	26	20	2	22	16	79	0	0	1	0	0	0	0	4	16	2	0	2	3	21	0	0	1	0	0	0	0
Otu00241	Bacteria;Bacteroidetes;Bacteroidia;Bacteroidales;Bacteroidaceae;Bacteroides	0	0	0	0	35	0	0	1	0	0	229	113	2	0	0	64	0	0	0	0	1	0	0	3	0	0	0	0	0	0	0	57	0	0	10	0	0	0	0	0	0	0
Otu00242	Bacteria;Firmicutes;Clostridia;Clostridiales;Ruminococcaceae;Faecalibacterium	27	4	9	2	8	2	38	12	18	7	0	0	17	1	2	8	4	9	0	39	7	3	1	0	1	0	2	0	4	0	1	0	39	10	129	0	3	2	1	0	66	35
Otu00243	Bacteria;Firmicutes;Clostridia;Clostridiales;Lachnospiraceae;unclassified_Lachnospiraceae	73	1	0	5	9	7	4	5	21	2	4	0	3	20	4	25	2	2	6	8	277	0	2	0	0	0	4	0	11	0	0	1	1	0	0	2	2	1	7	2	0	0
Otu00244	Bacteria;Firmicutes;Clostridia;Clostridiales;Lachnospiraceae;unclassified_Lachnospiraceae	0	0	0	0	0	79	0	2	11	0	4	18	3	0	1	0	0	0	269	0	24	21	0	11	0	0	0	0	10	1	0	0	1	27	0	0	13	0	5	0	7	0
Otu00245	Bacteria;Firmicutes;Clostridia;Clostridiales;Lachnospiraceae;Eisenbergiella	0	0	0	0	1	3	0	0	4	1	130	349	0	0	4	0	0	0	8	2	0	0	0	0	0	0	0	0	0	0	0	0	0	3	0	0	0	0	0	0	0	0
Otu00246	Bacteria;Bacteroidetes;Bacteroidia;Bacteroidales;Prevotellaceae;Prevotella	0	79	13	16	5	0	0	0	24	3	0	0	1	10	49	42	1	25	0	0	54	0	10	41	13	0	6	17	0	0	12	0	0	13	0	9	0	5	22	8	0	22
Otu00247	Bacteria;Firmicutes;Clostridia;Clostridiales;Ruminococcaceae;Ruminococcus	0	0	0	0	0	0	0	0	0	0	0	0	0	81	0	0	0	0	0	417	0	0	0	0	0	0	0	0	0	0	0	0	0	0	0	0	0	0	0	0	0	0
Otu00248	Bacteria;Firmicutes;Clostridia;Clostridiales;unclassified_Clostridiales;	0	0	0	4	66	193	0	0	12	0	67	0	0	53	1	58	0	0	0	2	0	0	0	0	0	0	0	0	0	0	28	0	0	0	0	2	0	11	0	0	0	0
Otu00249	Bacteria;Firmicutes;Negativicutes;Selenomonadales;Acidaminococcaceae;Phascolarctobacterium	0	0	52	49	68	0	0	0	10	69	23	0	1	55	26	66	3	22	0	0	25	0	0	0	0	0	0	0	0	0	0	0	0	0	0	0	0	0	22	0	0	0
Otu00250	Bacteria;Firmicutes;Clostridia;Clostridiales;unclassified_Clostridiales;	0	0	0	11	8	64	0	0	0	0	40	0	0	129	9	39	0	0	0	179	0	0	0	0	4	0	0	0	0	0	1	0	0	0	0	0	1	0	0	0	0	0
Otu00251	Bacteria;Firmicutes;Clostridia;Clostridiales;Lachnospiraceae;unclassified_Lachnospiraceae	11	9	7	6	12	10	34	58	44	21	0	0	3	7	27	10	0	1	14	24	2	0	0	0	0	0	16	1	15	4	1	0	81	30	31	1	4	0	0	0	0	1
Otu00252	Bacteria;Firmicutes;Clostridia;Clostridiales;Ruminococcaceae;Ruminococcus	0	0	0	0	8	61	0	152	13	2	76	5	0	0	20	7	1	0	72	38	0	0	0	0	0	0	0	0	0	1	0	0	1	22	3	0	1	0	0	0	0	0
Otu00253	Bacteria;Firmicutes;Clostridia;Clostridiales;Lachnospiraceae;Ruminococcus2	18	0	4	14	7	14	36	1	56	5	17	0	29	19	3	83	3	7	1	13	80	0	4	0	1	0	6	1	19	8	4	0	5	2	0	1	6	0	8	2	5	1
Otu00254	Bacteria;Firmicutes;Clostridia;Clostridiales;Ruminococcaceae;unclassified_Ruminococcaceae	0	0	0	3	36	12	0	7	18	59	8	0	19	13	12	186	2	1	48	12	0	0	0	1	1	0	0	0	0	1	26	0	2	11	0	0	1	2	0	0	0	0
Otu00255	Bacteria;Proteobacteria;Gammaproteobacteria;Pasteurellales;Pasteurellaceae;Haemophilus	22	30	0	38	1	5	3	3	27	1	0	0	1	1	0	2	5	61	1	3	0	0	0	0	0	1	0	0	0	29	1	0	198	0	12	1	1	0	8	2	1	21
Otu00256	Bacteria;Firmicutes;Clostridia;Clostridiales;Ruminococcaceae;Gemmiger	14	14	2	1	16	21	4	27	3	6	3	0	4	6	10	25	5	0	1	12	0	0	1	10	5	1	1	0	16	4	6	0	12	167	63	4	0	0	2	1	1	9
Otu00257	Bacteria;Firmicutes;Clostridia;Clostridiales;Lachnospiraceae;unclassified_Lachnospiraceae	0	6	0	2	18	1	0	179	0	22	21	1	2	6	3	55	1	0	73	4	0	0	0	0	0	0	0	0	0	0	2	0	0	73	0	0	0	1	0	0	0	0
Otu00258	Bacteria;Bacteroidetes;Bacteroidia;Bacteroidales;Rikenellaceae;Alistipes	7	0	2	5	5	11	0	69	4	0	31	187	0	16	2	27	0	0	0	1	40	0	0	1	0	0	0	3	17	1	2	1	2	25	0	0	3	0	0	1	0	5
Otu00259	Bacteria;Bacteroidetes;Bacteroidia;Bacteroidales;Bacteroidaceae;Bacteroides	0	0	24	0	0	0	0	0	0	0	0	0	0	0	4	0	0	0	0	0	127	0	28	37	8	0	28	108	0	0	0	0	0	9	0	36	0	0	0	58	0	0
Otu00260	Bacteria;Bacteroidetes;Bacteroidia;Bacteroidales;Prevotellaceae;Prevotella	0	0	0	0	0	0	0	0	0	0	0	0	0	0	0	0	0	0	0	0	0	0	0	0	0	0	0	0	0	461	0	0	0	0	0	0	0	0	0	0	0	0
Otu00261	Bacteria;Bacteroidetes;Bacteroidia;Bacteroidales;Bacteroidaceae;Bacteroides	85	2	0	0	0	10	30	29	3	0	8	54	0	0	0	3	0	0	115	0	6	0	0	0	0	1	0	20	1	7	0	31	0	7	32	0	6	0	0	0	7	0
Otu00262	Bacteria;Firmicutes;Clostridia;Clostridiales;Ruminococcaceae;Ruminococcus	0	0	0	0	0	0	0	0	0	131	0	0	0	66	0	196	0	0	0	64	0	0	0	0	0	0	0	0	0	0	0	0	0	0	0	0	0	0	0	0	0	0
Otu00263	Bacteria;Bacteroidetes;Bacteroidia;Bacteroidales;Bacteroidaceae;Bacteroides	0	0	0	0	0	0	0	0	0	0	0	0	0	0	0	0	0	0	0	0	0	0	0	0	0	259	0	0	0	0	0	0	0	0	0	0	0	0	0	0	196	0
Otu00264	Bacteria;Bacteroidetes;Bacteroidia;Bacteroidales;Prevotellaceae;Prevotella	0	0	0	0	0	0	0	0	0	138	0	0	97	67	0	0	144	0	0	0	0	0	0	0	0	0	0	0	0	0	0	0	0	0	0	0	0	7	0	0	0	0
Otu00265	Bacteria;Firmicutes;Clostridia;Clostridiales;Ruminococcaceae;unclassified_Ruminococcaceae	2	2	2	2	27	31	0	20	31	61	41	13	11	41	5	136	2	2	10	7	2	0	0	1	0	0	0	0	0	0	0	0	2	0	0	0	0	0	0	0	0	0
Otu00266	Bacteria;Bacteroidetes;Bacteroidia;Bacteroidales;Bacteroidaceae;Bacteroides	0	0	0	0	0	0	0	0	0	0	0	0	0	0	0	0	0	0	0	1	220	0	0	5	0	0	0	0	217	0	0	0	0	8	0	0	0	0	0	0	0	0
Otu00267	Bacteria;Firmicutes;Clostridia;Clostridiales;Lachnospiraceae;unclassified_Lachnospiraceae	3	1	20	7	18	6	13	9	26	13	1	0	5	10	14	39	2	3	12	10	49	0	7	3	0	0	19	1	20	6	7	0	1	72	6	1	5	7	16	5	9	3
Otu00268	Bacteria;Firmicutes;Clostridia;Clostridiales;Lachnospiraceae;unclassified_Lachnospiraceae	190	9	11	0	21	15	23	27	6	8	0	0	0	17	6	5	0	0	5	10	0	0	5	6	4	0	10	0	0	0	3	0	12	4	41	0	1	0	0	7	2	0
Otu00269	Bacteria;Bacteroidetes;Bacteroidia;Bacteroidales;Prevotellaceae;Paraprevotella	0	26	0	0	0	0	157	91	12	3	1	0	0	0	0	7	1	0	0	0	18	0	1	0	43	0	0	0	0	0	4	82	0	0	0	0	0	0	0	0	0	0
Otu00270	Bacteria;Firmicutes;Clostridia;Clostridiales;Lachnospiraceae;Lachnospiracea_incertae_sedis	15	7	1	2	4	44	129	7	24	4	0	0	7	1	11	3	0	0	0	11	0	0	2	0	2	0	8	0	2	3	1	0	75	4	67	1	6	0	0	0	0	4
Otu00271	Bacteria;Firmicutes;Clostridia;Clostridiales;Lachnospiraceae;unclassified_Lachnospiraceae	49	8	11	3	4	29	108	19	7	4	0	0	1	6	11	7	0	1	5	10	0	0	5	0	1	0	26	2	3	6	1	0	3	4	65	0	3	3	0	3	33	4
Otu00272	Bacteria;Firmicutes;unclassified_Firmicutes;;;	0	0	0	0	2	0	0	0	2	2	2	0	0	4	2	1	0	2	0	71	0	0	0	0	0	0	0	0	1	0	1	0	9	266	77	0	0	0	0	0	0	0
Otu00273	Bacteria;Bacteroidetes;Bacteroidia;Bacteroidales;Prevotellaceae;Prevotella	0	0	0	0	0	0	0	0	0	116	0	0	105	11	0	0	208	0	0	0	0	0	0	0	0	0	0	0	0	0	0	0	0	0	0	0	0	0	0	0	0	0
Otu00274	Bacteria;Synergistetes;Synergistia;Synergistales;Synergistaceae;Cloacibacillus	0	0	0	0	0	0	0	0	0	2	434	0	1	0	0	0	0	0	0	0	0	0	0	0	1	0	0	0	0	0	0	0	0	0	0	0	0	0	0	0	0	0
Otu00275	Bacteria;Firmicutes;Clostridia;Clostridiales;Lachnospiraceae;unclassified_Lachnospiraceae	0	5	0	8	0	7	78	111	9	22	0	0	5	4	2	21	0	0	0	4	0	0	0	0	1	3	0	0	0	37	3	17	22	2	11	0	6	0	0	0	52	0
Otu00276	Bacteria;Firmicutes;Clostridia;Clostridiales;Lachnospiraceae;Lachnospiracea_incertae_sedis	1	1	8	2	12	20	1	7	3	37	6	0	0	9	2	9	5	1	154	3	26	0	8	5	8	0	0	0	3	2	7	0	4	16	5	1	6	0	50	4	0	3
Otu00277	Bacteria;Firmicutes;Clostridia;Clostridiales;Ruminococcaceae;Flavonifractor	2	3	0	0	0	18	3	5	6	0	3	24	0	3	7	9	2	0	58	2	9	29	0	0	1	5	0	11	5	3	0	167	0	12	12	0	7	0	0	1	17	2
Otu00278	Bacteria;Firmicutes;Clostridia;Clostridiales;Lachnospiraceae;unclassified_Lachnospiraceae	41	9	6	16	27	23	0	125	11	20	1	0	0	1	3	63	0	0	5	5	0	0	5	0	2	0	0	0	1	30	0	0	16	3	2	0	0	10	0	0	1	0
Otu00279	Bacteria;Firmicutes;Clostridia;Clostridiales;Lachnospiraceae;unclassified_Lachnospiraceae	2	0	1	5	2	12	210	21	23	19	0	0	5	2	13	11	2	2	1	9	0	0	1	0	0	0	3	1	5	41	0	0	3	4	9	0	15	1	0	0	0	2
Otu00280	Bacteria;Firmicutes;Clostridia;Clostridiales;Ruminococcaceae;Clostridium IV	0	0	0	0	0	0	0	0	0	0	0	2	0	0	0	0	0	0	0	247	0	0	0	0	0	0	0	0	0	0	0	0	0	0	176	0	0	0	0	0	0	0
Otu00281	Bacteria;Firmicutes;Clostridia;Clostridiales;Clostridiaceae 1;Clostridium sensu stricto	0	0	0	2	0	2	0	0	101	4	0	8	4	1	0	0	1	0	0	1	0	71	0	205	0	0	5	0	0	2	0	0	3	9	0	0	0	3	2	0	0	0
Otu00282	Bacteria;Bacteroidetes;Bacteroidia;Bacteroidales;Bacteroidaceae;Bacteroides	0	73	0	0	0	0	0	0	0	0	0	0	0	0	0	0	0	0	0	0	0	0	180	0	26	0	0	0	0	0	0	0	0	0	0	0	0	0	0	0	144	0
Otu00283	Bacteria;Bacteroidetes;Bacteroidia;Bacteroidales;unclassified_Bacteroidales;	0	0	0	0	0	0	0	0	0	0	0	0	0	0	0	0	0	0	0	0	0	0	0	0	0	0	0	0	0	0	0	0	0	0	0	0	417	0	0	0	0	0
Otu00284	Bacteria;Bacteroidetes;Bacteroidia;Bacteroidales;Prevotellaceae;Prevotella	0	0	0	1	0	0	0	0	8	2	0	0	2	0	0	0	2	2	0	0	2	0	0	12	0	0	19	0	0	0	1	0	0	0	0	0	0	12	0	54	0	300
Otu00285	Bacteria;Bacteroidetes;Bacteroidia;Bacteroidales;Prevotellaceae;Prevotella	0	5	18	0	0	0	0	0	0	0	0	0	0	0	11	3	9	0	0	0	0	0	9	34	36	0	44	33	0	0	3	0	0	1	0	79	0	39	49	42	0	0
Otu00286	Bacteria;Bacteroidetes;Bacteroidia;Bacteroidales;Bacteroidaceae;Bacteroides	35	17	0	0	0	21	5	29	0	0	0	152	0	0	0	19	0	0	66	0	10	0	0	0	0	0	0	0	2	0	0	12	1	4	14	0	0	0	0	0	22	0
Otu00287	Bacteria;Bacteroidetes;Bacteroidia;Bacteroidales;Bacteroidaceae;Bacteroides	0	0	0	0	0	0	0	0	1	0	0	0	0	0	1	0	0	0	0	9	0	0	0	4	0	0	0	0	325	0	0	0	0	0	0	0	67	0	0	0	0	0
Otu00288	Bacteria;Firmicutes;Negativicutes;Selenomonadales;Veillonellaceae;Veillonella	21	7	2	37	0	8	2	3	0	3	0	0	3	0	0	1	4	47	0	1	0	0	1	13	0	0	1	0	2	2	7	1	166	3	49	3	7	3	0	1	0	7
Otu00289	Bacteria;Actinobacteria;Actinobacteria;Bifidobacteriales;Bifidobacteriaceae;unclassified_Bifidobacteriaceae	42	1	1	0	0	53	0	8	2	0	1	108	0	0	0	23	0	0	96	3	23	0	0	0	0	0	0	0	3	9	0	0	4	10	9	0	0	0	0	1	4	0
Otu00290	Bacteria;Firmicutes;Clostridia;Clostridiales;Ruminococcaceae;Clostridium IV	1	2	6	0	1	8	0	0	0	7	8	38	1	2	1	0	0	0	2	6	3	0	0	0	1	0	0	0	0	0	11	0	0	302	0	0	0	0	0	0	0	0
Otu00291	Bacteria;Bacteroidetes;Bacteroidia;Bacteroidales;Prevotellaceae;Prevotella	0	0	0	21	13	0	0	0	0	73	13	0	62	20	159	0	30	0	0	0	0	0	0	0	0	0	0	0	0	0	0	0	0	0	0	0	0	0	0	0	0	0
Otu00292	Bacteria;Firmicutes;Clostridia;Clostridiales;unclassified_Clostridiales;	0	0	0	0	2	0	0	0	15	0	19	0	0	107	0	114	107	0	0	0	0	0	0	0	0	0	0	0	0	0	25	0	0	0	0	0	0	1	0	0	0	0
Otu00293	Bacteria;Bacteroidetes;Bacteroidia;Bacteroidales;Prevotellaceae;Prevotella	0	0	0	50	27	0	0	0	0	63	0	0	48	15	158	0	23	0	0	0	0	0	0	0	0	0	0	0	0	0	0	0	0	0	0	0	0	0	0	0	0	0
Otu00294	Bacteria;Firmicutes;Negativicutes;Selenomonadales;Veillonellaceae;Megamonas	0	5	11	0	0	0	0	0	0	0	0	0	0	0	7	0	4	2	0	0	0	0	13	45	54	0	57	19	0	0	2	0	0	0	0	37	0	47	55	24	0	0
Otu00295	Bacteria;Actinobacteria;Actinobacteria;Bifidobacteriales;Bifidobacteriaceae;Bifidobacterium	3	0	0	0	0	0	0	237	0	0	0	19	0	0	0	73	0	0	16	0	0	0	0	0	0	0	0	0	12	3	1	0	0	4	3	0	1	0	1	1	4	0
Otu00296	Bacteria;Bacteroidetes;Bacteroidia;Bacteroidales;Bacteroidaceae;Bacteroides	0	0	0	0	0	0	0	0	3	0	0	0	0	0	3	0	0	0	0	13	0	0	0	6	0	0	0	0	292	0	0	0	0	0	0	0	58	0	0	3	0	0
Otu00297	Bacteria;Firmicutes;Clostridia;Clostridiales;Ruminococcaceae;Ruminococcus	0	0	0	0	378	0	0	0	0	0	0	0	0	0	0	0	0	0	0	0	0	0	0	0	0	0	0	0	0	0	0	0	0	0	0	0	0	0	0	0	0	0
Otu00298	Bacteria;Firmicutes;Clostridia;Clostridiales;Lachnospiraceae;unclassified_Lachnospiraceae	2	2	2	6	2	22	153	21	45	4	0	0	8	2	7	5	0	5	1	7	0	0	0	0	1	0	8	2	0	11	2	0	39	1	11	0	1	0	0	0	2	0
Otu00299	Bacteria;Bacteroidetes;Bacteroidia;Bacteroidales;Prevotellaceae;Prevotella	0	1	0	0	0	0	0	0	50	0	0	0	0	0	48	1	0	60	0	0	141	0	0	48	0	0	12	0	0	0	0	0	0	4	0	0	0	0	0	3	0	0
Otu00300	Bacteria;Firmicutes;Clostridia;Clostridiales;Ruminococcaceae;Gemmiger	64	14	14	5	3	44	0	12	14	3	0	0	4	12	9	19	13	3	28	15	48	0	0	10	2	0	4	0	4	4	0	0	2	2	13	1	0	0	0	0	0	0
Otu00301	Bacteria;Firmicutes;Clostridia;Clostridiales;Lachnospiraceae;Clostridium XlVa	0	4	1	6	19	2	0	3	18	14	0	2	3	12	1	9	34	13	24	1	6	6	12	0	3	0	27	2	2	4	6	0	0	6	2	0	5	43	1	4	68	2
Otu00302	Bacteria;Firmicutes;Clostridia;Clostridiales;Lachnospiraceae;unclassified_Lachnospiraceae	0	0	15	1	8	4	11	1	0	0	1	222	13	4	0	0	0	7	0	0	1	3	0	0	0	1	0	0	0	1	0	64	0	7	0	0	0	0	0	0	0	0
Otu00303	Bacteria;Bacteroidetes;Bacteroidia;Bacteroidales;Prevotellaceae;Prevotella	0	21	27	23	25	0	0	0	7	15	0	0	16	16	32	15	19	22	0	0	13	0	15	3	11	0	18	11	0	0	3	0	0	1	0	5	0	13	14	11	0	6
Otu00304	Bacteria;Firmicutes;Clostridia;Clostridiales;Lachnospiraceae;unclassified_Lachnospiraceae	1	2	0	0	1	18	0	23	180	9	0	0	5	1	4	9	0	51	0	14	0	0	0	0	1	0	0	0	0	0	5	0	4	31	2	0	0	1	0	0	0	0
Otu00305	Bacteria;Firmicutes;Clostridia;Clostridiales;Lachnospiraceae;unclassified_Lachnospiraceae	0	18	7	1	10	24	0	29	50	44	0	0	5	7	31	29	4	0	34	12	18	0	2	2	3	0	4	0	0	1	6	0	2	5	2	0	0	1	2	0	0	6
Otu00306	Bacteria;Proteobacteria;Betaproteobacteria;Burkholderiales;unclassified_Burkholderiales;	0	0	0	0	0	0	8	0	0	0	0	0	0	0	0	0	2	0	0	0	0	0	0	0	0	0	0	0	0	0	15	0	11	0	0	25	296	0	0	2	0	0
Otu00307	Bacteria;Bacteroidetes;Bacteroidia;Bacteroidales;unclassified_Bacteroidales;	0	9	0	0	3	0	0	0	1	1	0	0	0	0	56	70	1	2	0	0	3	0	0	4	0	0	1	51	0	0	10	0	0	17	0	0	0	0	19	0	0	111
Otu00308	Bacteria;unclassified_Bacteria;;;;	0	15	19	29	11	0	0	0	13	23	0	0	29	14	25	13	28	39	0	0	8	0	5	1	8	0	11	11	0	0	10	0	0	0	0	5	0	6	5	2	0	29
Otu00309	Bacteria;Bacteroidetes;Bacteroidia;Bacteroidales;unclassified_Bacteroidales;	0	0	0	0	0	0	0	0	0	0	0	0	0	0	11	0	0	0	0	0	0	0	0	0	0	0	0	0	0	0	4	0	0	0	0	0	339	0	0	0	0	0
Otu00310	Bacteria;Firmicutes;Clostridia;Clostridiales;unclassified_Clostridiales;	0	1	4	2	3	2	60	11	23	6	0	0	18	1	2	14	0	8	1	18	0	0	0	0	0	0	3	1	1	4	0	0	58	8	81	0	3	0	0	0	4	14
Otu00311	Bacteria;Bacteroidetes;Bacteroidia;Bacteroidales;Bacteroidaceae;Bacteroides	125	3	0	0	1	16	11	21	0	0	4	18	0	1	0	13	0	0	31	2	0	0	0	0	0	0	0	27	0	4	0	30	1	4	31	0	2	0	0	0	5	0
Otu00312	Bacteria;Bacteroidetes;Bacteroidia;Bacteroidales;unclassified_Bacteroidales;	0	64	12	5	9	0	0	0	1	0	0	0	9	5	16	13	0	7	0	0	9	0	0	9	8	0	0	117	0	0	6	0	0	1	0	0	0	6	7	8	0	37
Otu00313	Bacteria;Actinobacteria;Actinobacteria;Coriobacteriales;Coriobacteriaceae;Collinsella	0	0	0	0	0	0	0	0	0	0	0	0	0	0	0	0	0	0	0	0	0	341	0	0	0	0	0	7	0	0	0	0	0	0	0	0	0	0	0	0	0	0
Otu00314	Bacteria;Bacteroidetes;Bacteroidia;Bacteroidales;Bacteroidaceae;Bacteroides	0	25	0	0	0	0	0	0	1	0	0	0	0	0	10	0	2	0	0	0	0	0	46	41	55	0	0	0	0	0	6	0	0	0	0	0	0	1	3	158	0	0
Otu00315	Bacteria;Firmicutes;Negativicutes;Selenomonadales;Veillonellaceae;Dialister	0	0	0	0	0	0	0	0	0	0	0	0	0	0	0	0	0	0	0	346	0	0	0	0	0	0	0	0	0	0	0	0	0	0	0	0	0	0	0	0	0	0
Otu00316	Bacteria;Bacteroidetes;Bacteroidia;Bacteroidales;unclassified_Bacteroidales;	0	86	32	7	5	0	0	0	1	3	0	0	0	4	4	15	0	10	0	0	17	0	2	14	23	0	4	65	0	0	7	0	0	2	0	1	0	7	11	0	0	23
Otu00317	Bacteria;Firmicutes;Clostridia;Clostridiales;Lachnospiraceae;Clostridium XlVb	0	0	0	0	0	0	3	0	0	0	0	0	0	0	0	0	0	0	0	0	245	0	0	0	0	0	0	0	0	0	0	93	0	0	0	0	0	0	0	0	0	0
Otu00318	Bacteria;Proteobacteria;unclassified_Proteobacteria;;;	0	0	0	0	16	0	0	0	0	290	1	0	0	24	0	10	0	0	0	0	0	0	0	0	0	0	0	0	0	0	0	0	0	0	0	0	0	0	0	0	0	0
Otu00319	Bacteria;Firmicutes;Clostridia;Clostridiales;Lachnospiraceae;unclassified_Lachnospiraceae	5	2	0	2	0	0	153	2	3	3	0	0	5	3	9	2	7	0	0	6	8	0	2	0	2	0	6	0	7	47	3	0	2	2	17	1	21	0	0	0	14	5
Otu00320	Bacteria;Bacteroidetes;Bacteroidia;Bacteroidales;Bacteroidaceae;Bacteroides	0	140	31	0	0	0	0	0	0	0	0	0	0	0	0	0	0	0	0	0	0	0	67	0	11	0	11	0	0	0	0	0	0	0	0	79	0	0	0	0	0	0
Otu00321	Bacteria;Firmicutes;Clostridia;Clostridiales;Ruminococcaceae;unclassified_Ruminococcaceae	0	16	6	7	0	23	0	0	26	0	0	49	0	0	0	36	0	0	47	8	47	9	0	1	0	1	0	0	2	0	11	0	4	39	0	0	2	0	0	0	0	4
Otu00322	Bacteria;Firmicutes;Clostridia;Clostridiales;Lachnospiraceae;Cellulosilyticum	0	0	0	0	330	4	0	0	0	0	0	1	1	0	0	0	0	0	0	0	0	0	0	0	0	0	0	0	0	0	0	0	0	0	0	0	0	0	0	0	0	0
Otu00323	Bacteria;Proteobacteria;Gammaproteobacteria;Enterobacteriales;Enterobacteriaceae;unclassified_Enterobacteriaceae	0	0	0	0	0	8	0	0	0	4	0	5	0	0	0	0	0	0	0	0	0	0	0	35	0	0	0	0	0	0	278	0	0	0	0	0	2	0	0	1	0	0
Otu00324	Bacteria;Firmicutes;Negativicutes;Selenomonadales;Veillonellaceae;Mitsuokella	0	0	0	0	0	0	0	0	0	0	0	0	0	0	0	0	0	0	0	0	0	0	333	0	0	0	0	0	0	0	0	0	0	0	0	0	0	0	0	0	0	0
Otu00325	Bacteria;Firmicutes;Clostridia;Clostridiales;Ruminococcaceae;unclassified_Ruminococcaceae	4	7	4	0	3	12	2	24	1	1	0	0	0	0	9	17	3	0	0	7	0	0	0	1	0	0	0	0	15	1	1	0	19	164	29	0	1	0	0	0	0	6
Otu00326	Bacteria;Bacteroidetes;Bacteroidia;Bacteroidales;Bacteroidaceae;Bacteroides	0	0	0	0	0	0	0	0	0	0	0	0	0	0	0	0	0	0	0	1	183	0	0	0	0	0	0	0	137	0	0	0	0	9	0	0	0	0	0	1	0	0
Otu00327	Bacteria;Bacteroidetes;Bacteroidia;Bacteroidales;Prevotellaceae;Prevotella	0	0	0	27	7	0	0	0	25	22	0	0	8	33	0	8	41	10	0	0	0	0	0	0	50	0	0	0	0	0	42	0	0	0	0	0	0	58	0	0	0	0
Otu00328	Bacteria;Firmicutes;Clostridia;Clostridiales;unclassified_Clostridiales;	0	0	2	1	11	0	0	42	1	18	96	0	5	12	16	78	1	1	0	22	0	0	0	0	0	0	0	0	0	0	1	0	1	21	0	0	0	0	0	0	0	0
Otu00329	Bacteria;Firmicutes;Clostridia;unclassified_Clostridia;;	0	0	0	0	2	0	0	8	0	8	286	0	1	17	1	3	1	0	0	1	0	0	0	0	0	0	0	0	0	0	0	0	0	0	0	0	0	0	0	0	0	0
Otu00330	Bacteria;Bacteroidetes;Bacteroidia;Bacteroidales;Bacteroidaceae;Bacteroides	138	8	0	0	0	1	7	23	0	0	0	25	0	0	0	3	0	0	15	0	2	0	0	0	0	0	0	14	2	45	0	15	0	7	17	0	3	0	0	0	1	0
Otu00331	Bacteria;Firmicutes;Clostridia;Clostridiales;Lachnospiraceae;Blautia	0	0	0	0	0	0	0	0	0	0	0	0	0	0	0	0	0	0	0	0	0	320	0	0	0	0	0	0	0	5	0	0	0	0	0	0	0	0	0	0	0	0
Otu00332	Bacteria;Firmicutes;Negativicutes;Selenomonadales;Veillonellaceae;Allisonella	1	0	1	5	10	0	0	0	7	0	0	0	10	8	5	0	20	0	0	0	0	0	27	12	4	0	8	0	33	0	4	0	5	86	0	0	0	39	30	9	0	0
Otu00333	Bacteria;Bacteroidetes;Bacteroidia;Bacteroidales;Prevotellaceae;Alloprevotella	0	0	0	137	15	0	0	0	0	49	0	0	0	0	0	0	0	0	0	0	0	0	0	0	0	0	0	0	0	0	123	0	0	0	0	0	0	0	0	0	0	0
Otu00334	Bacteria;Firmicutes;Clostridia;Clostridiales;Lachnospiraceae;unclassified_Lachnospiraceae	2	0	0	0	1	2	0	0	0	2	167	76	0	0	10	0	0	0	25	0	0	0	0	0	0	0	0	0	0	0	0	0	0	35	0	0	0	0	0	0	1	1
Otu00335	Bacteria;Firmicutes;Bacilli;Lactobacillales;Lactobacillaceae;Lactobacillus	0	0	0	37	0	0	0	3	0	0	1	0	0	0	0	0	0	0	109	0	0	0	0	0	0	0	0	0	0	10	0	0	0	128	0	9	0	0	22	0	0	0
Otu00336	Bacteria;Bacteroidetes;Bacteroidia;Bacteroidales;Bacteroidaceae;Bacteroides	0	67	0	0	0	0	0	0	0	0	0	0	0	0	0	0	0	0	0	0	0	0	137	0	11	0	0	0	0	0	1	0	0	0	0	0	0	0	0	0	103	0
Otu00337	Bacteria;Firmicutes;Negativicutes;Selenomonadales;Veillonellaceae;unclassified_Veillonellaceae	0	0	0	0	0	0	0	0	0	0	0	0	0	0	0	0	19	0	0	0	0	0	41	23	57	0	0	0	0	1	4	0	0	37	0	55	0	49	0	33	0	0
Otu00338	Bacteria;Firmicutes;Clostridia;Clostridiales;Ruminococcaceae;Faecalibacterium	30	6	9	1	4	5	12	7	3	6	0	0	6	2	1	8	1	5	1	9	13	7	2	0	1	0	1	0	0	2	1	0	7	19	56	0	2	3	0	3	43	38
Otu00339	Bacteria;Bacteroidetes;Bacteroidia;Bacteroidales;Prevotellaceae;Prevotella	0	0	0	0	5	0	0	0	0	90	0	0	4	28	0	0	0	0	0	0	0	0	0	0	0	0	0	0	0	0	0	0	0	0	0	0	0	187	0	0	0	0
Otu00340	Bacteria;Firmicutes;Clostridia;Clostridiales;Ruminococcaceae;unclassified_Ruminococcaceae	18	11	14	1	3	10	3	75	0	7	4	0	1	1	9	3	0	4	1	17	33	0	0	3	0	0	0	56	1	0	5	0	9	8	7	0	0	1	0	0	4	3
Otu00341	Bacteria;Bacteroidetes;Bacteroidia;Bacteroidales;Bacteroidaceae;Bacteroides	0	0	0	0	0	0	0	0	0	0	0	0	0	0	0	0	0	0	0	37	0	0	1	1	1	31	0	0	230	0	0	0	0	0	0	0	0	0	0	9	2	0
Otu00342	Bacteria;Bacteroidetes;Bacteroidia;Bacteroidales;unclassified_Bacteroidales;	0	23	0	0	0	0	0	0	1	0	0	0	0	0	30	0	0	0	0	0	0	0	62	36	63	0	0	0	0	0	7	0	0	0	0	0	0	1	17	71	0	0
Otu00343	Bacteria;Firmicutes;unclassified_Firmicutes;;;	85	1	1	0	0	1	10	8	15	5	0	1	0	0	5	21	2	4	24	1	38	0	0	0	0	0	11	0	0	14	0	3	1	32	18	0	0	1	0	1	4	0
Otu00344	Bacteria;Bacteroidetes;Bacteroidia;Bacteroidales;Prevotellaceae;Prevotella	0	30	0	17	3	0	0	0	1	2	0	0	3	1	122	3	0	17	0	0	19	0	0	0	79	0	2	0	0	0	6	0	0	0	0	0	0	0	0	1	0	0
Otu00345	Bacteria;Firmicutes;Clostridia;Clostridiales;Ruminococcaceae;unclassified_Ruminococcaceae	0	12	11	3	4	4	0	18	30	22	14	85	11	2	3	12	1	1	45	4	0	0	0	0	1	0	0	0	1	0	0	0	1	19	0	0	0	0	0	0	0	0
Otu00346	Bacteria;Firmicutes;unclassified_Firmicutes;;;	0	2	4	0	0	0	0	0	0	0	0	0	0	0	13	5	10	0	1	0	0	62	0	6	6	36	61	10	0	0	2	0	1	10	0	11	0	11	29	24	0	0
Otu00347	Bacteria;Lentisphaerae;Lentisphaeria;Victivallales;Victivallaceae;Victivallis	0	0	0	0	0	0	0	0	0	0	0	0	0	0	0	0	0	0	0	0	0	0	0	0	0	0	0	0	0	0	0	0	0	304	0	0	0	0	0	0	0	0
Otu00348	Bacteria;Bacteroidetes;Bacteroidia;Bacteroidales;Porphyromonadaceae;Parabacteroides	0	0	0	0	3	0	0	0	1	0	289	0	0	4	1	0	0	0	0	0	2	0	0	0	0	0	0	0	0	0	0	0	0	0	0	0	0	0	0	0	3	0
Otu00349	Bacteria;Firmicutes;unclassified_Firmicutes;;;	0	0	0	1	7	0	0	35	0	0	143	0	1	4	2	101	0	0	0	7	0	0	0	0	0	0	0	0	0	0	0	0	0	0	0	0	0	0	0	0	0	0
Otu00350	Bacteria;unclassified_Bacteria;;;;	0	16	7	27	22	0	0	0	1	12	0	0	4	24	30	2	7	19	0	0	18	0	8	0	4	0	17	6	0	0	18	0	0	0	0	2	0	14	8	3	0	30
Otu00351	Bacteria;Firmicutes;Clostridia;Clostridiales;Peptostreptococcaceae;Clostridium XI	0	0	0	0	0	0	0	0	0	0	0	0	0	0	0	0	0	0	0	0	0	290	0	0	0	0	0	0	0	7	0	0	0	0	0	0	0	0	0	0	0	0
Otu00352	Bacteria;Bacteroidetes;Bacteroidia;Bacteroidales;Prevotellaceae;Prevotella	0	33	0	30	49	0	0	0	0	34	0	0	2	76	0	22	2	21	0	0	0	0	0	0	0	0	0	0	0	0	0	0	0	0	0	0	0	28	0	0	0	0
Otu00353	Bacteria;Bacteroidetes;Bacteroidia;Bacteroidales;Prevotellaceae;unclassified_Prevotellaceae	0	0	0	120	3	0	0	0	0	20	0	0	25	6	24	3	42	0	0	0	0	0	0	0	0	0	0	0	0	0	54	0	0	0	0	0	0	0	0	0	0	0
Otu00354	Bacteria;Bacteroidetes;Bacteroidia;Bacteroidales;unclassified_Bacteroidales;	0	0	0	0	0	2	0	1	0	0	14	255	0	0	0	0	0	0	20	0	0	0	0	0	0	0	0	0	0	0	0	0	1	1	0	0	0	0	0	0	0	0
Otu00355	Bacteria;Firmicutes;Clostridia;Clostridiales;Lachnospiraceae;unclassified_Lachnospiraceae	0	0	0	3	100	0	0	0	0	36	10	0	10	70	40	22	0	0	0	0	0	0	0	0	0	0	0	0	0	0	0	0	0	2	0	0	0	1	0	0	0	0
Otu00356	Bacteria;Bacteroidetes;Bacteroidia;Bacteroidales;Porphyromonadaceae;Odoribacter	20	0	0	3	1	30	0	17	3	0	7	38	0	2	0	42	0	0	0	3	83	0	0	0	1	0	0	0	1	0	1	0	1	30	0	0	6	2	0	0	1	1
Otu00357	Bacteria;Bacteroidetes;Bacteroidia;Bacteroidales;Prevotellaceae;Prevotella	0	0	0	15	2	0	0	0	7	39	0	0	7	19	0	2	57	15	0	0	0	0	0	0	30	0	0	0	0	0	11	0	0	0	0	0	0	88	0	0	0	0
Otu00358	Bacteria;Bacteroidetes;Bacteroidia;Bacteroidales;Prevotellaceae;Prevotella	0	22	33	9	14	0	0	0	4	7	0	0	17	11	2	11	13	24	0	0	5	0	6	1	9	0	5	10	0	0	8	0	0	3	0	4	0	19	12	7	0	32
Otu00359	Bacteria;Firmicutes;Clostridia;Clostridiales;Lachnospiraceae;Lachnospiracea_incertae_sedis	72	2	3	7	11	22	17	7	7	5	1	0	1	11	7	16	0	5	1	9	0	0	3	2	1	0	7	2	4	1	11	0	3	2	24	0	4	0	0	0	13	5
Otu00360	Bacteria;Firmicutes;Clostridia;Clostridiales;unclassified_Clostridiales;	0	0	0	0	0	0	0	0	0	14	269	0	0	1	1	0	0	0	0	0	0	0	0	0	0	0	0	0	0	0	0	0	0	0	0	0	0	0	0	0	0	0
Otu00361	Bacteria;Firmicutes;Clostridia;Clostridiales;Ruminococcaceae;Faecalibacterium	9	4	7	2	12	2	22	19	10	4	0	0	10	0	5	10	4	8	10	21	8	6	1	0	1	0	0	3	2	0	2	0	28	7	46	0	2	0	0	0	12	6
Otu00362	Bacteria;Firmicutes;Clostridia;Clostridiales;Lachnospiraceae;unclassified_Lachnospiraceae	9	0	1	1	3	4	4	49	16	19	1	0	0	4	48	1	0	0	3	17	7	0	3	0	0	0	1	0	7	16	11	1	1	10	12	0	6	5	0	2	1	20
Otu00363	Bacteria;Bacteroidetes;Bacteroidia;Bacteroidales;Prevotellaceae;Prevotella	0	0	0	30	11	0	0	0	1	16	0	0	15	24	0	2	34	1	0	0	0	0	0	0	68	0	0	0	0	0	25	0	0	0	0	0	0	56	0	0	0	0
Otu00364	Bacteria;Firmicutes;Clostridia;Clostridiales;Ruminococcaceae;Ruminococcus	0	0	0	2	5	43	0	31	5	0	107	0	0	0	14	0	0	0	52	20	0	0	0	0	0	0	0	0	0	0	0	0	0	0	0	0	0	0	3	0	0	0
Otu00365	Bacteria;Firmicutes;Negativicutes;Selenomonadales;Veillonellaceae;Megamonas	0	3	32	0	0	0	0	0	0	0	0	0	0	0	9	8	0	0	4	0	0	118	0	0	8	2	2	35	0	0	0	0	0	0	0	0	0	19	35	5	0	0
Otu00366	Bacteria;Firmicutes;Clostridia;Clostridiales;Lachnospiraceae;unclassified_Lachnospiraceae	0	0	0	0	225	0	0	0	0	0	0	0	0	55	0	0	0	0	0	0	0	0	0	0	0	0	0	0	0	0	0	0	0	0	0	0	0	0	0	0	0	0
Otu00367	Bacteria;Bacteroidetes;Bacteroidia;Bacteroidales;Bacteroidaceae;Bacteroides	0	0	0	0	0	0	0	0	0	0	0	0	0	0	2	0	0	0	30	20	31	0	2	2	0	2	1	8	140	0	0	0	0	30	0	0	0	0	0	0	10	0
Otu00368	Bacteria;Bacteroidetes;Bacteroidia;Bacteroidales;Bacteroidaceae;Bacteroides	0	0	0	0	0	4	158	10	1	0	1	0	0	0	0	2	0	0	0	0	0	1	0	0	0	0	0	1	0	30	0	29	1	0	39	0	0	0	0	0	0	1
Otu00369	Bacteria;Bacteroidetes;Bacteroidia;Bacteroidales;Bacteroidaceae;Bacteroides	8	0	0	1	0	36	1	38	3	7	0	0	0	1	8	0	0	1	109	0	0	0	0	0	0	0	1	0	0	7	0	0	0	54	0	0	0	0	0	0	2	0
Otu00370	Bacteria;Proteobacteria;Gammaproteobacteria;Enterobacteriales;Enterobacteriaceae;unclassified_Enterobacteriaceae	0	0	0	0	0	0	0	0	0	6	0	4	0	0	0	0	0	0	0	0	0	0	0	4	0	0	0	0	0	0	257	0	0	1	0	0	3	0	0	1	0	0
Otu00371	Bacteria;Firmicutes;Clostridia;Clostridiales;Ruminococcaceae;unclassified_Ruminococcaceae	0	0	0	0	0	19	0	0	0	0	0	4	0	0	0	0	0	0	51	0	123	7	0	0	0	0	0	31	0	0	0	0	1	0	0	0	0	0	0	0	39	0
Otu00372	Bacteria;Bacteroidetes;Bacteroidia;Bacteroidales;Bacteroidaceae;Bacteroides	0	0	0	0	0	0	0	0	0	0	0	0	0	0	6	0	0	0	0	22	0	0	1	1	0	26	0	0	154	0	0	0	0	0	11	0	7	0	1	4	41	0
Otu00373	Bacteria;Firmicutes;Negativicutes;Selenomonadales;Veillonellaceae;Megamonas	0	0	0	0	0	0	0	0	0	0	0	0	0	0	1	0	1	0	0	0	0	0	0	1	0	0	7	192	0	0	2	0	0	2	0	18	0	0	4	44	0	0
Otu00374	Bacteria;Fusobacteria;Fusobacteriia;Fusobacteriales;Fusobacteriaceae;unclassified_Fusobacteriaceae	0	0	0	0	0	0	0	0	0	0	0	0	0	0	0	0	0	0	0	0	0	38	0	45	0	133	51	0	0	0	0	0	0	0	0	0	0	0	0	5	0	0
Otu00375	Bacteria;Firmicutes;Clostridia;Clostridiales;Lachnospiraceae;Roseburia	0	2	0	3	0	1	12	2	21	0	0	0	0	0	0	1	0	4	3	0	0	0	0	0	0	0	0	0	0	4	0	0	211	4	2	0	0	0	0	0	1	0
Otu00376	Bacteria;Firmicutes;Clostridia;Clostridiales;Ruminococcaceae;Faecalibacterium	15	4	17	1	0	0	6	10	1	3	0	0	0	3	1	7	1	1	1	2	5	0	1	0	0	0	1	0	1	4	2	0	17	10	52	0	2	7	3	1	58	32
Otu00377	Bacteria;Firmicutes;Negativicutes;Selenomonadales;Veillonellaceae;Megamonas	0	2	7	0	0	0	0	0	0	0	0	0	0	0	2	0	2	0	0	0	0	0	5	29	29	0	30	23	0	0	3	0	0	1	0	49	0	22	31	34	0	0
Otu00378	Bacteria;Firmicutes;Clostridia;Clostridiales;Ruminococcaceae;Faecalibacterium	26	5	6	1	1	10	25	8	4	2	0	0	0	2	2	15	0	9	0	8	0	0	0	0	0	0	1	0	0	1	0	0	25	2	75	0	1	3	0	0	29	5
Otu00379	Bacteria;Bacteroidetes;Bacteroidia;Bacteroidales;Prevotellaceae;Alloprevotella	0	0	0	0	0	0	0	0	0	0	0	0	0	0	0	0	0	0	0	0	0	0	0	0	0	0	0	0	0	0	0	0	0	0	0	0	266	0	0	0	0	0
Otu00380	Bacteria;Firmicutes;Clostridia;Clostridiales;Ruminococcaceae;unclassified_Ruminococcaceae	0	3	7	4	18	0	0	14	25	39	3	0	13	7	8	13	9	2	9	4	14	0	3	14	3	0	1	0	5	0	8	0	3	1	1	0	5	14	2	0	0	13
Otu00381	Bacteria;Bacteroidetes;Bacteroidia;Bacteroidales;Bacteroidaceae;Bacteroides	0	96	19	0	0	0	0	0	0	0	0	0	0	0	0	0	0	0	0	0	0	0	61	0	20	0	5	0	0	0	1	0	0	0	0	63	0	0	0	0	0	0
Otu00382	Bacteria;Firmicutes;Negativicutes;Selenomonadales;Veillonellaceae;Megamonas	0	0	0	0	0	0	0	0	0	0	0	0	0	0	0	0	0	0	0	0	0	29	0	0	0	174	60	0	0	0	0	0	0	0	0	0	0	0	0	0	0	0
Otu00383	Bacteria;Firmicutes;unclassified_Firmicutes;;;	0	0	0	0	4	0	0	0	0	0	15	0	0	20	2	3	0	0	0	8	0	0	0	0	0	0	0	0	0	0	0	0	12	167	31	0	0	0	0	0	0	0
Otu00384	Bacteria;Firmicutes;Clostridia;Clostridiales;Lachnospiraceae;unclassified_Lachnospiraceae	9	7	1	0	42	13	0	9	5	46	2	1	4	7	8	27	10	4	4	8	14	13	1	1	2	0	1	0	0	0	5	0	1	4	5	0	0	3	1	1	0	2
Otu00385	Bacteria;Firmicutes;Clostridia;Clostridiales;Lachnospiraceae;Dorea	23	8	2	1	25	8	11	12	25	11	9	0	10	14	10	11	8	6	13	5	14	0	1	2	0	0	1	0	1	0	1	8	1	7	2	0	1	1	1	0	6	2
Otu00386	Bacteria;unclassified_Bacteria;;;;	44	1	0	0	0	1	40	33	0	0	0	6	0	2	5	11	0	1	3	2	8	4	0	1	0	0	0	1	2	11	0	24	7	12	31	0	2	0	0	0	4	1
Otu00387	Bacteria;Firmicutes;Clostridia;Clostridiales;Lachnospiraceae;unclassified_Lachnospiraceae	0	1	0	5	0	78	0	0	2	0	0	0	0	2	1	114	3	0	0	42	0	0	0	0	0	0	0	0	0	0	1	0	1	0	6	0	1	0	0	0	0	0
Otu00388	Bacteria;Bacteroidetes;Bacteroidia;Bacteroidales;Prevotellaceae;Prevotella	0	0	6	0	4	0	0	0	0	6	0	0	0	5	2	2	1	1	0	0	5	0	0	4	0	0	0	0	0	0	74	0	0	0	0	0	0	143	0	0	0	4
Otu00389	Bacteria;unclassified_Bacteria;;;;	0	1	11	0	0	0	0	0	0	0	0	0	0	0	3	1	0	0	0	0	0	0	10	38	35	0	26	3	0	0	3	0	0	0	0	33	0	43	40	10	0	0
Otu00390	Bacteria;Firmicutes;Clostridia;Clostridiales;Lachnospiraceae;Roseburia	21	4	9	11	7	0	8	5	11	13	0	0	0	1	9	8	6	1	0	3	2	0	2	1	0	0	0	0	1	0	0	0	0	2	1	0	2	3	0	0	102	22
Otu00391	Bacteria;Bacteroidetes;Bacteroidia;Bacteroidales;Bacteroidaceae;Bacteroides	0	1	0	0	0	1	0	6	0	0	0	10	0	0	0	0	1	0	0	2	0	3	0	4	0	0	0	40	0	0	0	178	4	0	5	0	0	0	0	0	0	0
Otu00392	Bacteria;Firmicutes;Clostridia;Clostridiales;Lachnospiraceae;Roseburia	2	3	5	1	2	20	18	11	18	5	0	0	14	1	3	17	2	6	0	8	0	0	1	0	1	0	0	0	5	8	3	0	31	25	28	0	2	0	0	0	0	15
Otu00393	Bacteria;Bacteroidetes;Bacteroidia;Bacteroidales;Bacteroidaceae;Bacteroides	0	0	0	0	0	0	0	0	0	0	0	0	0	0	0	0	0	0	0	0	0	0	0	0	0	59	0	0	0	0	0	0	0	0	0	0	0	0	0	0	196	0
Otu00394	Bacteria;Proteobacteria;Alphaproteobacteria;Rhodospirillales;Rhodospirillaceae;unclassified_Rhodospirillaceae	0	0	0	0	0	139	0	0	0	0	0	53	0	0	0	0	0	0	0	0	0	0	0	0	0	0	0	0	62	0	0	0	0	0	0	0	0	0	0	0	0	0
Otu00395	Bacteria;Bacteroidetes;Bacteroidia;Bacteroidales;Bacteroidaceae;Bacteroides	13	4	0	0	0	2	60	25	0	0	1	16	0	0	0	0	0	0	11	0	0	4	0	0	0	0	0	20	0	12	0	54	0	13	16	0	0	1	0	0	1	0
Otu00396	Bacteria;Firmicutes;Clostridia;Clostridiales;Lachnospiraceae;unclassified_Lachnospiraceae	1	0	0	32	11	1	0	4	15	27	1	0	8	1	46	48	11	1	0	8	4	0	0	0	0	0	0	0	0	0	5	0	1	2	6	0	1	3	0	0	0	15
Otu00397	Bacteria;Bacteroidetes;Bacteroidia;Bacteroidales;Bacteroidaceae;Bacteroides	24	0	0	0	0	2	20	0	0	0	3	15	0	0	0	10	0	0	0	2	3	6	0	0	0	0	0	0	0	4	0	18	0	7	133	0	0	0	0	0	1	3
Otu00398	Bacteria;Firmicutes;Clostridia;Clostridiales;Lachnospiraceae;unclassified_Lachnospiraceae	0	0	0	0	1	0	0	1	160	0	0	0	5	0	0	2	1	42	0	8	0	0	0	0	0	0	0	0	0	0	4	0	0	24	0	0	0	0	0	0	0	0
Otu00399	Bacteria;Bacteroidetes;Bacteroidia;Bacteroidales;Prevotellaceae;Prevotella	0	18	8	12	2	0	0	0	0	2	0	0	0	5	9	2	0	1	0	0	1	0	26	16	37	0	6	21	0	0	1	0	0	0	0	18	0	13	13	34	0	3
Otu00400	Bacteria;Bacteroidetes;Bacteroidia;Bacteroidales;Bacteroidaceae;Bacteroides	2	5	0	0	0	58	1	8	2	0	8	0	0	1	0	0	0	0	80	9	5	29	0	0	0	0	0	10	5	6	1	1	0	8	2	0	0	1	0	0	0	5
Otu00401	Bacteria;Bacteroidetes;Bacteroidia;Bacteroidales;Prevotellaceae;Prevotella	0	4	2	1	22	0	0	0	2	11	0	0	5	17	34	13	1	3	0	0	11	0	1	7	7	0	0	38	0	0	18	0	0	1	0	3	0	3	7	3	0	31
Otu00402	Bacteria;Firmicutes;Negativicutes;Selenomonadales;Veillonellaceae;Mitsuokella	0	0	0	0	0	0	0	0	0	0	0	0	0	0	0	0	0	0	0	0	0	0	186	0	0	0	0	0	0	0	0	0	0	0	0	0	0	59	0	0	0	0
Otu00403	Bacteria;Firmicutes;Clostridia;Clostridiales;Clostridiaceae 1;Clostridium sensu stricto	0	1	1	1	26	24	0	2	2	2	8	60	0	5	0	0	9	0	5	2	0	0	8	2	1	0	53	0	3	6	0	0	5	13	0	2	0	1	1	0	0	0
Otu00404	Bacteria;Firmicutes;Clostridia;Clostridiales;unclassified_Clostridiales;	0	0	0	0	0	0	0	0	0	0	8	0	0	81	0	154	0	0	0	0	0	0	0	0	0	0	0	0	0	0	0	0	0	0	0	0	0	0	0	0	0	0
Otu00405	Bacteria;Bacteroidetes;Bacteroidia;Bacteroidales;Prevotellaceae;Prevotella	0	0	0	0	0	0	0	0	0	41	0	0	86	5	0	0	111	0	0	0	0	0	0	0	0	0	0	0	0	0	0	0	0	0	0	0	0	0	0	0	0	0
Otu00406	Bacteria;Firmicutes;Clostridia;Clostridiales;Clostridiaceae 1;Clostridium sensu stricto	0	0	0	0	177	0	0	0	0	0	0	0	0	39	3	0	0	0	0	0	0	0	0	0	0	0	0	0	4	0	0	0	0	0	0	0	0	17	0	0	0	0
Otu00407	Bacteria;Firmicutes;Clostridia;Clostridiales;unclassified_Clostridiales;	0	0	0	0	0	0	0	0	0	0	102	0	0	132	0	4	0	0	0	0	0	0	0	0	0	0	0	0	0	0	0	0	0	0	0	0	0	0	0	0	0	0
Otu00408	Bacteria;Bacteroidetes;Bacteroidia;Bacteroidales;Prevotellaceae;Prevotella	0	0	0	0	0	0	0	0	0	0	0	0	0	0	0	0	0	0	0	0	0	0	0	0	0	0	0	0	0	0	0	0	0	0	0	0	0	0	0	238	0	0
Otu00409	Bacteria;Firmicutes;Clostridia;Clostridiales;Lachnospiraceae;Roseburia	0	0	0	0	0	20	57	0	0	0	0	0	0	0	0	0	0	0	0	8	0	0	0	0	2	0	0	0	1	126	0	0	6	0	16	0	2	0	0	0	0	0
Otu00410	Bacteria;Bacteroidetes;Bacteroidia;Bacteroidales;unclassified_Bacteroidales;	0	43	0	36	28	0	0	0	0	19	0	0	0	60	0	31	5	4	0	0	0	0	0	0	0	0	0	0	0	0	0	0	0	0	0	0	0	12	0	0	0	0
Otu00411	Bacteria;Proteobacteria;unclassified_Proteobacteria;;;	0	0	0	0	1	0	0	0	1	0	0	0	0	0	0	1	13	0	0	0	0	221	0	0	0	0	0	0	0	1	0	0	0	0	0	0	0	0	0	0	0	0
Otu00412	Bacteria;Firmicutes;Clostridia;Clostridiales;Lachnospiraceae;unclassified_Lachnospiraceae	0	1	0	0	13	12	0	27	16	0	4	1	0	0	3	1	4	0	31	7	0	0	1	0	0	0	0	0	0	0	3	0	0	107	6	0	0	0	0	0	0	0
Otu00413	Bacteria;Firmicutes;Bacilli;Lactobacillales;Streptococcaceae;Streptococcus	0	0	0	2	0	0	146	0	6	0	0	0	17	0	0	0	0	0	0	0	0	0	0	4	0	0	0	0	0	0	0	44	0	1	0	0	0	4	1	0	12	0
Otu00414	Bacteria;Bacteroidetes;Bacteroidia;Bacteroidales;Prevotellaceae;Prevotella	0	0	0	0	0	0	0	0	0	0	0	0	0	0	0	0	0	0	0	0	0	0	0	0	0	0	0	0	0	0	0	0	0	0	0	0	0	235	0	0	0	0
Otu00415	Bacteria;Firmicutes;Clostridia;Clostridiales;unclassified_Clostridiales;	0	0	0	0	36	9	0	14	48	4	14	53	0	19	5	6	3	7	0	0	0	0	2	0	0	0	0	0	0	0	0	0	0	1	0	0	6	6	0	1	0	0
Otu00416	Bacteria;Firmicutes;Clostridia;Clostridiales;unclassified_Clostridiales;	0	0	0	1	52	33	1	2	1	0	0	53	0	1	0	2	5	0	0	1	0	0	2	0	0	0	49	2	1	26	0	0	1	1	0	0	0	0	0	0	0	0
Otu00417	Bacteria;Firmicutes;unclassified_Firmicutes;;;	0	1	26	0	0	0	0	0	0	0	0	0	0	0	10	6	7	1	1	0	0	9	1	6	12	0	35	34	0	0	4	0	3	16	0	5	0	32	13	11	0	0
Otu00418	Bacteria;Firmicutes;Clostridia;Clostridiales;Ruminococcaceae;unclassified_Ruminococcaceae	0	0	0	10	26	0	0	15	8	35	0	0	1	54	3	73	0	0	0	6	0	0	0	0	0	0	0	0	0	0	0	0	0	0	0	0	0	2	0	0	0	0
Otu00419	Bacteria;Firmicutes;Clostridia;Clostridiales;Lachnospiraceae;unclassified_Lachnospiraceae	20	2	11	8	5	0	7	4	12	4	1	0	4	1	5	15	8	3	0	3	2	0	2	1	1	0	0	0	0	0	0	0	1	3	1	0	4	2	0	0	86	16
Otu00420	Bacteria;Firmicutes;Clostridia;Clostridiales;Lachnospiraceae;unclassified_Lachnospiraceae	20	1	14	2	1	8	1	3	30	1	3	0	9	4	0	35	1	3	1	9	21	3	0	0	1	0	1	4	10	1	0	1	1	1	1	0	1	0	0	3	34	1
Otu00421	Bacteria;Firmicutes;Negativicutes;Selenomonadales;Veillonellaceae;unclassified_Veillonellaceae	0	0	0	0	0	0	0	0	0	0	0	0	0	0	0	0	33	0	18	0	0	0	0	37	0	0	0	0	0	0	0	0	0	0	0	0	0	52	90	0	0	0
Otu00422	Bacteria;Firmicutes;Clostridia;Clostridiales;Lachnospiraceae;Clostridium XlVa	1	0	2	0	0	5	0	3	0	1	8	196	0	1	0	0	0	0	2	0	1	0	0	0	0	0	0	0	0	0	0	0	0	0	0	0	0	0	0	0	9	0
Otu00423	Bacteria;Firmicutes;Erysipelotrichia;Erysipelotrichales;Erysipelotrichaceae;Holdemanella	0	6	0	0	1	0	0	0	107	0	0	0	1	1	53	1	13	1	0	3	39	0	0	0	0	0	0	0	0	0	0	0	0	0	0	0	0	3	0	0	0	0
Otu00424	Bacteria;Firmicutes;Clostridia;Clostridiales;Lachnospiraceae;Lachnospiracea_incertae_sedis	21	1	1	0	0	3	11	0	7	0	1	0	0	0	0	8	0	0	1	0	17	76	0	0	0	4	6	2	3	8	0	50	0	0	0	0	1	2	1	0	4	0
Otu00425	Bacteria;Bacteroidetes;Bacteroidia;Bacteroidales;Bacteroidaceae;Bacteroides	95	2	0	0	0	4	8	21	0	0	1	5	0	0	0	3	0	0	12	0	0	0	0	0	0	0	0	10	0	4	0	38	0	3	17	0	2	0	0	0	2	1
Otu00426	Bacteria;Firmicutes;Clostridia;Clostridiales;Lachnospiraceae;Clostridium XlVb	1	0	0	0	0	6	16	0	0	0	0	0	0	0	0	0	0	0	0	3	4	0	0	0	0	1	0	0	0	155	0	31	4	0	5	0	1	0	0	0	1	0
Otu00427	Bacteria;Firmicutes;Clostridia;Clostridiales;Lachnospiraceae;unclassified_Lachnospiraceae	0	3	0	10	0	0	0	43	0	2	0	0	0	134	0	34	0	0	0	0	0	0	0	0	0	0	0	0	0	0	0	0	0	0	0	0	1	0	0	0	0	0
Otu00428	Bacteria;Firmicutes;Clostridia;Clostridiales;Lachnospiraceae;unclassified_Lachnospiraceae	1	0	5	14	13	1	0	4	3	28	0	0	2	17	64	33	4	2	3	1	10	0	0	0	1	0	0	0	0	0	6	0	0	1	6	0	0	1	0	0	1	4
Otu00429	Bacteria;Firmicutes;Clostridia;Clostridiales;Lachnospiraceae;Roseburia	14	9	20	2	4	0	9	4	9	4	0	0	2	1	7	5	0	3	0	2	0	0	4	1	3	0	0	0	0	0	1	0	1	1	9	0	2	1	0	3	93	11
Otu00430	Bacteria;Firmicutes;Erysipelotrichia;Erysipelotrichales;Erysipelotrichaceae;Catenibacterium	0	0	0	0	18	0	0	0	0	84	2	0	5	21	0	0	3	7	0	44	0	0	0	0	0	0	0	0	0	0	0	0	38	0	0	0	0	2	0	0	0	0
Otu00431	Bacteria;Firmicutes;Clostridia;Clostridiales;Ruminococcaceae;Faecalibacterium	10	39	2	1	4	3	0	2	1	4	0	0	21	3	3	4	6	0	0	21	1	10	0	0	0	0	0	0	5	2	1	0	26	1	9	0	1	6	0	0	7	29
Otu00432	Bacteria;Firmicutes;Clostridia;Clostridiales;Ruminococcaceae;Faecalibacterium	0	0	0	21	18	0	0	0	0	17	2	0	0	51	5	67	0	0	0	10	0	0	0	0	0	0	0	0	0	0	30	0	0	0	0	0	0	1	0	0	0	0
Otu00433	Bacteria;Bacteroidetes;Bacteroidia;Bacteroidales;Porphyromonadaceae;Parabacteroides	47	0	0	0	0	4	19	17	1	0	0	19	0	0	0	3	0	0	52	0	4	0	0	0	0	0	0	13	1	6	0	5	0	2	19	0	4	0	0	0	4	1
Otu00434	Bacteria;Firmicutes;Negativicutes;Selenomonadales;Veillonellaceae;Megamonas	0	0	4	2	0	0	0	0	0	0	0	0	0	0	0	1	11	0	0	0	0	9	0	24	3	2	135	6	0	0	0	0	1	4	0	15	0	2	1	0	0	0
Otu00435	Bacteria;Bacteroidetes;Bacteroidia;Bacteroidales;unclassified_Bacteroidales;	0	0	0	0	0	4	0	2	0	0	1	175	0	0	0	0	0	0	34	0	0	0	0	0	0	0	0	0	1	0	0	0	0	2	0	0	0	0	0	0	0	0
Otu00436	Bacteria;Bacteroidetes;Bacteroidia;Bacteroidales;Prevotellaceae;Alloprevotella	0	0	0	0	0	0	0	0	0	0	0	0	36	16	55	10	94	0	0	0	0	0	0	0	0	0	0	0	0	0	0	0	0	8	0	0	0	0	0	0	0	0
Otu00437	Bacteria;Bacteroidetes;Bacteroidia;Bacteroidales;Porphyromonadaceae;Coprobacter	11	0	0	0	0	2	0	8	0	0	0	0	0	0	2	0	0	0	3	0	52	0	0	2	3	0	0	0	7	0	0	112	0	11	0	0	5	0	0	0	0	0
Otu00438	Bacteria;Bacteroidetes;Bacteroidia;Bacteroidales;Bacteroidaceae;Bacteroides	13	20	0	0	0	24	5	1	7	0	0	9	0	0	5	10	0	0	32	2	1	0	0	6	1	4	0	10	6	8	1	2	0	1	4	0	10	0	0	0	10	25
Otu00439	Bacteria;Firmicutes;Clostridia;Clostridiales;Ruminococcaceae;Gemmiger	77	4	2	1	0	13	0	5	0	2	0	0	1	11	5	1	6	0	13	2	66	0	1	1	0	0	0	0	2	1	0	0	0	0	1	0	0	0	1	0	0	0
Otu00440	Bacteria;Firmicutes;Clostridia;Clostridiales;Lachnospiraceae;Blautia	7	20	0	1	24	1	0	0	4	24	0	0	1	2	11	3	7	0	75	6	16	0	0	1	0	0	3	0	0	0	0	0	0	4	1	1	2	0	0	0	0	1
Otu00441	Bacteria;Firmicutes;Clostridia;Clostridiales;Ruminococcaceae;unclassified_Ruminococcaceae	0	0	0	0	38	0	0	0	0	23	36	0	6	70	14	0	17	0	0	0	0	0	0	0	5	0	0	0	0	0	0	0	0	0	0	0	0	6	0	0	0	0
Otu00442	Bacteria;Bacteroidetes;Bacteroidia;Bacteroidales;Bacteroidaceae;Bacteroides	0	0	1	0	0	0	0	0	0	0	0	0	0	0	1	0	0	0	7	32	41	0	8	2	0	24	1	16	56	0	0	0	0	11	0	1	0	0	0	10	3	0
Otu00443	Bacteria;Firmicutes;Clostridia;Clostridiales;Peptostreptococcaceae;Terrisporobacter	11	1	4	1	3	26	11	1	12	1	10	15	0	16	0	7	0	2	33	9	0	0	1	0	0	0	0	0	6	0	0	0	0	26	0	1	9	3	0	4	0	0
Otu00444	Bacteria;Firmicutes;unclassified_Firmicutes;;;	0	0	0	0	0	0	0	0	0	0	209	0	0	4	0	0	0	0	0	0	0	0	0	0	0	0	0	0	0	0	0	0	0	0	0	0	0	0	0	0	0	0
Otu00445	Bacteria;Firmicutes;Clostridia;Clostridiales;Lachnospiraceae;unclassified_Lachnospiraceae	4	0	12	8	3	0	12	8	25	13	0	0	3	3	9	6	18	3	0	3	0	0	3	0	2	0	0	0	0	0	0	0	0	2	3	0	2	1	0	1	39	29
Otu00446	Bacteria;Bacteroidetes;Bacteroidia;Bacteroidales;Bacteroidaceae;Bacteroides	0	0	0	0	0	0	0	0	0	0	0	0	0	0	0	0	0	0	0	0	0	0	0	0	0	0	0	0	0	0	0	0	0	0	0	0	212	0	0	0	0	0
Otu00447	Bacteria;Firmicutes;Negativicutes;Selenomonadales;Veillonellaceae;Megamonas	0	0	0	0	0	0	0	0	0	0	0	0	0	0	1	0	6	0	5	0	0	0	0	15	0	2	0	0	0	0	0	0	1	0	0	1	0	71	108	0	0	0
Otu00448	Bacteria;Bacteroidetes;Bacteroidia;Bacteroidales;Bacteroidaceae;Bacteroides	0	0	0	0	0	0	0	0	0	0	0	0	0	0	0	0	0	0	0	0	114	0	0	1	0	0	0	0	82	0	0	0	0	13	0	0	0	0	0	0	0	0
Otu00449	Bacteria;Bacteroidetes;Bacteroidia;Bacteroidales;Bacteroidaceae;Bacteroides	1	0	0	0	0	30	0	9	1	0	7	0	0	0	0	0	0	0	155	0	0	1	0	0	0	0	0	0	1	0	0	0	0	1	0	0	0	0	0	0	3	0
Otu00450	Bacteria;Firmicutes;Clostridia;Clostridiales;Ruminococcaceae;Ruminococcus	0	0	6	9	0	0	0	26	1	24	0	0	9	3	32	10	1	0	0	36	0	0	0	1	2	0	0	0	10	0	0	0	3	0	24	0	0	1	1	0	0	9
Otu00451	Bacteria;Actinobacteria;Actinobacteria;Bifidobacteriales;Bifidobacteriaceae;Bifidobacterium	35	0	1	0	1	3	0	0	0	0	1	34	0	0	0	1	0	0	81	0	18	0	0	0	0	0	0	0	0	2	0	0	1	2	15	0	0	0	0	4	8	0
Otu00452	Bacteria;Firmicutes;Clostridia;Clostridiales;Lachnospiraceae;Roseburia	0	0	2	2	0	2	8	39	24	5	0	0	12	2	2	4	0	26	2	9	0	0	0	0	0	0	0	0	0	0	0	0	13	2	8	0	6	1	0	0	34	4
Otu00453	Bacteria;Firmicutes;Clostridia;Clostridiales;Ruminococcaceae;unclassified_Ruminococcaceae	0	0	0	0	24	0	0	13	1	29	10	0	19	41	2	45	0	0	0	12	0	0	0	2	0	0	0	0	0	0	7	0	1	0	0	0	0	0	0	0	0	0
Otu00454	Bacteria;Firmicutes;Clostridia;Clostridiales;Lachnospiraceae;Blautia	48	3	5	2	9	6	2	11	5	4	0	2	2	8	7	0	1	0	24	6	25	0	1	0	0	0	0	0	3	1	0	0	6	6	13	0	1	3	0	0	0	2
Otu00455	Bacteria;Bacteroidetes;Bacteroidia;Bacteroidales;Porphyromonadaceae;Parabacteroides	3	0	0	0	0	48	9	11	0	0	0	0	0	0	0	0	0	0	126	0	0	0	0	0	0	0	0	0	0	7	0	0	0	0	2	0	0	0	0	0	0	0
Otu00456	Bacteria;Bacteroidetes;Bacteroidia;Bacteroidales;unclassified_Bacteroidales;	0	0	13	0	0	0	0	0	0	0	0	0	0	0	2	0	0	5	0	0	19	0	29	25	6	0	21	37	0	0	0	0	0	0	0	18	0	0	1	28	0	0
Otu00457	Bacteria;Bacteroidetes;Bacteroidia;Bacteroidales;Bacteroidaceae;Bacteroides	0	0	0	0	0	0	0	0	0	0	0	0	0	0	0	0	0	0	0	1	118	0	0	2	0	0	0	0	80	0	0	0	0	1	0	0	0	0	0	2	0	0
Otu00458	Bacteria;Firmicutes;Clostridia;Clostridiales;Lachnospiraceae;Roseburia	1	2	3	4	2	30	1	17	15	1	0	0	4	0	9	14	3	1	0	9	0	0	0	0	0	0	1	1	4	11	1	0	17	16	34	0	0	0	0	0	0	1
Otu00459	Bacteria;Bacteroidetes;Bacteroidia;Bacteroidales;Porphyromonadaceae;Parabacteroides	34	4	0	0	0	4	0	1	2	1	0	0	0	1	0	0	3	0	17	1	16	4	0	0	0	21	0	3	0	23	1	0	0	0	2	1	19	0	0	0	43	0
Otu00460	Bacteria;Bacteroidetes;Bacteroidia;Bacteroidales;Bacteroidaceae;Bacteroides	0	0	0	0	1	0	0	0	0	0	62	0	0	1	0	0	0	3	0	28	54	0	1	5	2	0	0	0	0	0	0	0	5	35	0	0	3	0	0	0	0	0
Otu00461	Bacteria;Firmicutes;Clostridia;Clostridiales;Lachnospiraceae;Lachnospiracea_incertae_sedis	37	6	4	4	3	16	0	6	8	7	4	0	0	8	6	18	3	0	1	2	16	0	0	0	1	0	8	5	7	20	1	1	3	0	2	1	1	0	1	0	0	0
Otu00462	Bacteria;Bacteroidetes;Bacteroidia;Bacteroidales;Bacteroidaceae;Bacteroides	4	3	0	0	0	5	0	46	0	0	3	103	0	0	0	1	0	0	3	2	5	0	0	0	0	0	0	1	0	0	0	0	0	23	0	0	0	0	0	0	0	0
Otu00463	Bacteria;Firmicutes;Clostridia;Clostridiales;Ruminococcaceae;unclassified_Ruminococcaceae	0	0	0	7	15	0	0	0	5	27	31	0	8	10	0	95	0	1	0	0	0	0	0	0	0	0	0	0	0	0	0	0	0	0	0	0	0	0	0	0	0	0
Otu00464	Bacteria;Bacteroidetes;Bacteroidia;Bacteroidales;Bacteroidaceae;Bacteroides	31	1	0	0	0	2	12	4	0	0	0	17	0	0	0	2	0	0	23	0	0	1	0	0	0	0	0	6	1	1	0	25	0	5	63	0	0	0	0	0	2	2
Otu00465	Bacteria;Proteobacteria;Gammaproteobacteria;Enterobacteriales;Enterobacteriaceae;Escherichia/Shigella	1	0	0	0	0	1	2	0	0	22	1	13	0	0	0	0	28	0	0	0	1	45	0	26	1	2	3	0	0	3	37	5	1	1	0	0	1	0	0	1	1	0
Otu00466	Bacteria;Firmicutes;Clostridia;Clostridiales;Lachnospiraceae;Roseburia	4	4	5	4	2	0	5	9	29	17	0	0	5	2	7	5	13	13	0	9	0	0	0	0	5	0	0	0	4	4	0	0	1	2	2	0	6	1	0	1	34	3
Otu00467	Bacteria;Firmicutes;Clostridia;Clostridiales;Lachnospiraceae;Fusicatenibacter	22	1	1	1	5	9	31	36	4	1	0	0	0	0	8	4	0	2	1	5	0	0	0	2	0	0	1	0	1	0	1	0	5	5	42	0	0	0	0	2	5	0
Otu00468	Bacteria;unclassified_Bacteria;;;;	0	1	0	0	0	0	0	0	3	0	0	0	0	0	1	0	0	0	0	79	0	0	3	0	1	0	0	0	39	0	0	0	0	0	3	0	14	0	0	1	49	0
Otu00469	Bacteria;Firmicutes;Clostridia;Clostridiales;unclassified_Clostridiales;	0	0	1	1	5	17	1	1	1	12	13	51	0	8	0	7	1	1	3	1	0	0	1	0	0	3	0	0	0	35	0	14	2	8	1	0	2	0	2	0	0	2
Otu00470	Bacteria;Firmicutes;Clostridia;Clostridiales;Lachnospiraceae;unclassified_Lachnospiraceae	44	5	9	1	3	28	0	7	3	0	0	0	3	0	7	1	0	1	0	4	0	0	0	1	0	0	0	2	1	0	2	0	7	0	55	0	1	1	0	0	7	1
Otu00471	Bacteria;Firmicutes;Clostridia;Clostridiales;Lachnospiraceae;unclassified_Lachnospiraceae	15	0	6	2	3	2	4	4	4	8	0	1	0	6	6	1	3	2	8	0	52	17	0	1	0	0	7	2	1	4	1	7	0	8	3	0	0	3	4	1	3	4
Otu00472	Bacteria;Firmicutes;Clostridia;Clostridiales;Lachnospiraceae;unclassified_Lachnospiraceae	10	2	0	1	1	0	77	4	1	0	1	0	0	1	10	2	0	0	0	5	0	0	0	0	4	0	4	0	1	5	0	1	1	1	16	0	5	0	0	0	33	7
Otu00473	Bacteria;Firmicutes;Negativicutes;Selenomonadales;Veillonellaceae;Megamonas	0	0	0	0	0	0	0	0	0	0	0	0	0	0	1	0	0	0	0	0	0	0	0	6	5	128	0	0	0	0	1	0	0	0	0	0	0	0	5	47	0	0
Otu00474	Bacteria;Bacteroidetes;Bacteroidia;Bacteroidales;unclassified_Bacteroidales;	2	0	0	0	0	3	0	37	0	0	4	124	0	0	0	1	0	0	15	0	1	0	0	0	0	0	0	0	0	0	0	0	0	5	0	0	0	0	0	0	0	0
Otu00475	Bacteria;Bacteroidetes;Bacteroidia;Bacteroidales;Bacteroidaceae;Bacteroides	0	29	5	1	1	0	0	0	2	0	0	0	1	2	9	2	0	2	0	0	2	0	1	5	3	0	1	103	0	0	0	0	0	0	0	0	0	0	3	3	0	17
Otu00476	Bacteria;Firmicutes;Clostridia;Clostridiales;Ruminococcaceae;unclassified_Ruminococcaceae	0	0	0	0	1	15	0	4	0	0	159	0	0	0	1	0	1	0	0	10	0	0	0	0	0	0	0	0	0	0	0	0	0	0	0	0	0	0	0	0	0	0
Otu00477	Bacteria;Bacteroidetes;Bacteroidia;Bacteroidales;Bacteroidaceae;Bacteroides	0	0	3	0	0	0	0	0	0	0	23	120	0	0	0	0	0	0	0	0	18	0	0	0	0	0	0	0	0	0	1	4	0	21	0	0	0	0	0	0	0	0
Otu00478	Bacteria;Bacteroidetes;Bacteroidia;Bacteroidales;Prevotellaceae;Prevotella	0	0	0	16	11	0	0	0	0	31	0	0	27	10	89	0	6	0	0	0	0	0	0	0	0	0	0	0	0	0	0	0	0	0	0	0	0	0	0	0	0	0
Otu00479	Bacteria;Bacteroidetes;Bacteroidia;Bacteroidales;Bacteroidaceae;Bacteroides	0	1	0	0	0	0	0	0	0	0	0	0	0	0	0	0	0	0	0	52	0	0	1	1	0	27	0	0	52	0	0	0	0	0	0	0	6	0	0	7	42	0
Otu00480	Bacteria;Firmicutes;Clostridia;Clostridiales;Lachnospiraceae;unclassified_Lachnospiraceae	42	0	0	0	0	1	6	0	4	0	1	0	0	0	1	4	0	1	0	0	17	26	0	0	0	5	11	0	0	4	0	63	0	2	0	0	0	0	0	0	0	0
Otu00481	Bacteria;Firmicutes;Clostridia;Clostridiales;Lachnospiraceae;Fusicatenibacter	2	1	0	3	6	8	2	40	7	3	3	0	1	5	3	11	0	1	30	3	2	0	3	1	0	0	0	0	3	4	5	0	2	27	7	0	0	0	0	1	2	2
Otu00482	Bacteria;Firmicutes;Clostridia;Clostridiales;Lachnospiraceae;Lachnospiracea_incertae_sedis	0	4	0	1	1	0	0	17	45	5	0	0	0	0	6	25	0	73	0	0	0	0	0	0	1	0	0	0	0	0	6	0	0	2	0	0	0	1	0	0	0	1
Otu00483	Bacteria;Firmicutes;Clostridia;Clostridiales;Lachnospiraceae;unclassified_Lachnospiraceae	0	1	0	1	2	4	10	3	93	9	0	0	5	4	6	12	2	0	0	3	0	0	0	0	0	0	9	0	1	3	3	0	7	2	4	0	0	1	0	0	0	2
Otu00484	Bacteria;Firmicutes;Clostridia;Clostridiales;unclassified_Clostridiales;	0	0	0	7	11	0	0	0	0	10	15	0	4	23	18	55	7	0	0	4	0	0	2	5	1	0	0	0	0	0	8	0	6	0	0	0	1	3	1	0	0	5
Otu00485	Bacteria;Firmicutes;Clostridia;Clostridiales;Lachnospiraceae;unclassified_Lachnospiraceae	23	5	14	4	4	0	4	2	6	2	0	0	1	0	4	3	7	2	0	2	0	0	4	1	4	0	0	0	0	0	0	0	0	1	2	0	1	0	0	0	83	5
Otu00486	Bacteria;unclassified_Bacteria;;;;	0	1	7	0	0	0	0	0	0	0	0	0	0	0	3	0	3	0	0	0	0	0	4	14	22	0	9	27	0	0	3	0	0	0	0	11	0	15	21	43	0	0
Otu00487	Bacteria;Firmicutes;Clostridia;Clostridiales;Lachnospiraceae;unclassified_Lachnospiraceae	5	0	0	0	0	15	41	0	0	0	0	0	0	0	0	0	0	0	0	8	17	0	0	0	0	0	0	0	0	83	0	2	2	0	9	0	0	0	1	0	0	0
Otu00488	Bacteria;Firmicutes;Clostridia;Clostridiales;Lachnospiraceae;unclassified_Lachnospiraceae	0	0	0	0	0	0	0	0	3	0	0	0	0	0	0	0	0	0	0	0	0	0	0	0	0	0	0	0	1	0	0	0	0	0	176	0	1	0	0	0	0	0
Otu00489	Bacteria;Bacteroidetes;Bacteroidia;Bacteroidales;unclassified_Bacteroidales;	0	51	0	5	2	0	0	0	1	2	0	0	0	4	8	2	2	8	0	0	5	0	0	1	17	0	0	0	0	0	11	0	0	6	0	0	0	0	1	0	0	55
Otu00490	Bacteria;Bacteroidetes;Bacteroidia;Bacteroidales;Bacteroidaceae;Bacteroides	0	0	0	0	0	0	0	0	15	0	0	0	0	0	15	0	0	21	0	0	96	0	0	22	0	0	5	0	0	0	0	0	0	7	0	0	0	0	0	0	0	0
Otu00491	Bacteria;Bacteroidetes;Bacteroidia;Bacteroidales;Prevotellaceae;Prevotella	0	0	0	0	0	0	0	0	0	0	0	0	0	0	0	0	0	0	0	0	0	0	0	0	0	0	0	0	0	0	0	0	0	0	0	0	0	181	0	0	0	0
Otu00492	Bacteria;Firmicutes;Negativicutes;Selenomonadales;Veillonellaceae;Veillonella	0	2	0	1	0	0	0	0	0	0	0	0	0	0	0	0	0	8	0	0	0	0	0	0	0	0	0	0	0	0	0	2	151	0	2	3	1	0	0	0	0	10
Otu00493	Bacteria;Firmicutes;Clostridia;Clostridiales;Lachnospiraceae;unclassified_Lachnospiraceae	29	2	2	2	1	21	55	2	2	1	0	0	0	1	6	7	0	0	0	7	0	0	1	2	1	0	6	0	0	0	0	0	2	0	15	0	2	0	0	1	12	0
Otu00494	Bacteria;Firmicutes;Clostridia;Clostridiales;Lachnospiraceae;unclassified_Lachnospiraceae	3	0	0	2	1	12	40	6	47	1	0	0	11	1	0	8	0	3	5	9	3	0	0	0	0	0	2	1	6	2	1	0	9	0	1	0	1	1	0	2	0	1
Otu00495	Bacteria;Firmicutes;Clostridia;Clostridiales;Lachnospiraceae;unclassified_Lachnospiraceae	21	0	0	0	0	3	11	0	2	0	0	0	0	0	0	2	0	0	0	0	29	51	0	0	0	6	1	0	2	0	0	42	1	1	0	0	2	1	0	2	1	0
Otu00496	Bacteria;Firmicutes;Clostridia;Clostridiales;Lachnospiraceae;unclassified_Lachnospiraceae	0	2	0	1	56	60	0	8	5	43	0	0	0	1	0	2	0	0	0	0	0	0	0	0	0	0	0	0	0	0	0	0	0	0	0	0	0	0	0	0	0	0
Otu00497	Bacteria;Bacteroidetes;Bacteroidia;Bacteroidales;Bacteroidaceae;Bacteroides	1	0	0	0	0	0	0	8	0	9	17	97	0	0	0	1	0	0	0	8	0	0	0	7	1	0	0	4	0	1	0	0	0	19	0	0	1	1	0	0	0	2
Otu00498	Bacteria;Bacteroidetes;Bacteroidia;Bacteroidales;Bacteroidaceae;Bacteroides	71	4	0	0	0	2	6	8	1	0	1	10	0	0	0	0	0	0	10	0	3	0	0	0	0	0	0	1	0	2	0	40	0	0	17	0	1	0	0	0	0	0
Otu00499	Bacteria;Firmicutes;Clostridia;Clostridiales;Lachnospiraceae;unclassified_Lachnospiraceae	7	7	0	5	15	4	0	4	18	12	1	0	9	15	12	15	1	3	9	6	0	0	0	0	3	0	0	0	1	0	0	0	1	25	0	0	0	2	0	0	0	2
Otu00500	Bacteria;Firmicutes;Clostridia;Clostridiales;Lachnospiraceae;unclassified_Lachnospiraceae	0	1	0	0	0	1	0	6	56	0	0	0	2	0	6	18	0	49	0	9	0	0	0	0	3	0	0	0	0	0	7	0	0	18	0	0	0	1	0	0	0	0
Otu00501	Bacteria;Firmicutes;Clostridia;Clostridiales;Ruminococcaceae;unclassified_Ruminococcaceae	0	0	0	0	0	0	0	0	0	0	164	0	0	13	0	0	0	0	0	0	0	0	0	0	0	0	0	0	0	0	0	0	0	0	0	0	0	0	0	0	0	0
Otu00502	Bacteria;Bacteroidetes;Bacteroidia;Bacteroidales;Prevotellaceae;Prevotella	0	0	0	0	0	0	0	0	0	85	0	0	1	21	0	0	15	0	0	0	0	0	0	0	0	0	0	0	0	0	0	0	0	0	0	0	0	55	0	0	0	0
Otu00503	Bacteria;Fusobacteria;Fusobacteriia;Fusobacteriales;Fusobacteriaceae;unclassified_Fusobacteriaceae	0	0	0	0	3	0	0	0	25	0	0	0	2	0	0	0	0	2	0	0	0	25	0	11	0	18	39	0	0	0	0	45	1	0	0	0	0	0	1	4	0	0
Otu00504	Bacteria;Firmicutes;Clostridia;Clostridiales;Lachnospiraceae;unclassified_Lachnospiraceae	56	1	3	4	1	10	0	25	12	17	0	0	0	0	6	2	0	10	0	5	0	0	0	0	0	0	2	1	1	0	1	0	0	3	14	0	0	0	0	0	0	2
Otu00505	Bacteria;Bacteroidetes;Bacteroidia;Bacteroidales;Bacteroidaceae;Bacteroides	0	0	0	0	0	0	0	0	0	0	0	0	0	0	0	0	0	0	30	14	18	0	0	1	0	0	0	11	40	0	0	0	0	36	0	2	0	0	0	0	23	0
Otu00506	Bacteria;Bacteroidetes;Bacteroidia;Bacteroidales;Bacteroidaceae;Bacteroides	0	2	2	0	0	0	0	0	0	0	0	0	0	0	3	2	0	0	0	0	33	0	1	10	3	0	0	106	0	0	0	0	0	3	0	0	0	0	0	9	0	1
Otu00507	Bacteria;Proteobacteria;Deltaproteobacteria;Desulfovibrionales;Desulfovibrionaceae;unclassified_Desulfovibrionaceae	0	0	0	26	0	0	0	0	14	0	0	0	11	0	0	119	0	0	0	0	0	0	0	0	0	0	0	0	0	4	0	0	0	0	0	0	0	0	0	0	0	0
Otu00508	Bacteria;Bacteroidetes;Bacteroidia;Bacteroidales;Porphyromonadaceae;Parabacteroides	12	1	0	0	0	0	12	0	0	0	2	9	0	0	0	15	0	0	0	0	0	1	0	0	0	0	0	0	0	1	0	17	0	3	98	0	0	0	0	0	2	1
Otu00509	Bacteria;Firmicutes;Clostridia;Clostridiales;Lachnospiraceae;unclassified_Lachnospiraceae	1	6	0	0	3	4	0	6	75	7	0	0	3	4	5	10	4	0	0	7	1	0	1	0	0	0	5	1	3	10	1	0	8	0	1	0	3	2	0	0	0	3
Otu00510	Bacteria;Firmicutes;Clostridia;Clostridiales;Lachnospiraceae;Ruminococcus2	56	0	0	1	0	5	7	2	15	0	0	0	1	11	0	57	0	0	0	7	0	0	0	0	1	0	3	0	1	1	0	0	4	0	1	0	0	0	0	1	0	0
Otu00511	Bacteria;Bacteroidetes;Bacteroidia;Bacteroidales;unclassified_Bacteroidales;	0	0	0	0	0	22	0	7	0	0	16	42	0	0	0	0	0	0	73	0	0	0	0	0	0	0	0	0	0	0	0	0	0	11	0	0	0	0	0	0	0	0
Otu00512	Bacteria;Firmicutes;Clostridia;Clostridiales;Lachnospiraceae;unclassified_Lachnospiraceae	35	12	7	1	3	24	0	12	5	4	0	2	0	0	16	8	0	10	5	6	0	0	0	1	0	0	0	1	0	0	0	0	10	2	7	0	0	0	0	0	0	0
Otu00513	Bacteria;Firmicutes;Clostridia;Clostridiales;Lachnospiraceae;unclassified_Lachnospiraceae	57	12	2	0	10	9	5	2	1	2	2	13	0	14	17	3	0	1	3	2	0	0	1	0	0	0	2	0	1	0	0	0	3	0	3	0	0	0	0	1	2	3
Otu00514	Bacteria;Firmicutes;Clostridia;Clostridiales;unclassified_Clostridiales;	0	0	0	0	2	0	0	0	0	0	97	0	0	58	0	14	0	0	0	0	0	0	0	0	0	0	0	0	0	0	0	0	0	0	0	0	0	0	0	0	0	0
Otu00515	Bacteria;Firmicutes;Clostridia;Clostridiales;Lachnospiraceae;unclassified_Lachnospiraceae	0	4	0	3	93	6	0	5	5	37	0	0	0	8	0	5	5	0	0	0	0	0	0	0	0	0	0	0	0	0	0	0	0	0	0	0	0	0	0	0	0	0
Otu00516	Bacteria;Firmicutes;Clostridia;Clostridiales;Ruminococcaceae;Anaerotruncus	0	0	0	0	0	12	0	1	0	0	0	153	0	0	0	0	0	0	0	1	0	0	0	0	0	0	0	0	0	0	2	0	0	1	0	0	0	0	0	0	0	0
Otu00517	Bacteria;Firmicutes;Clostridia;Clostridiales;Clostridiaceae 1;Clostridium sensu stricto	0	1	2	3	52	20	0	1	3	1	13	14	0	11	0	1	6	0	1	1	1	0	3	0	1	0	16	0	3	6	0	0	5	3	0	0	0	0	0	0	0	1
Otu00518	Bacteria;Firmicutes;Clostridia;Clostridiales;unclassified_Clostridiales;	6	0	0	2	3	0	17	0	4	8	0	0	0	3	2	12	0	0	0	3	3	0	2	0	0	0	0	0	0	14	0	0	18	0	17	0	0	2	0	0	44	9
Otu00519	Bacteria;Bacteroidetes;Bacteroidia;Bacteroidales;Bacteroidaceae;Bacteroides	0	1	0	0	0	0	0	0	0	0	0	0	0	0	0	0	0	0	0	3	0	0	0	0	0	1	0	0	4	0	0	0	0	0	1	0	147	0	0	0	12	0
Otu00520	Bacteria;Firmicutes;Clostridia;Clostridiales;Lachnospiraceae;unclassified_Lachnospiraceae	0	0	0	1	5	0	0	0	1	48	8	0	1	5	10	15	0	0	0	9	1	0	7	0	0	0	0	0	0	8	0	0	6	0	0	0	1	1	3	37	0	2
Otu00521	Bacteria;Bacteroidetes;Bacteroidia;Bacteroidales;Prevotellaceae;unclassified_Prevotellaceae	0	0	0	0	0	0	0	0	0	0	0	0	0	0	0	0	0	0	0	0	0	0	0	0	0	0	0	0	0	0	0	0	0	0	0	0	0	0	0	168	0	0
Otu00522	Bacteria;unclassified_Bacteria;;;;	0	0	0	5	10	2	0	17	0	0	96	0	24	4	0	10	0	0	0	0	0	0	0	0	0	0	0	0	0	0	0	0	0	0	0	0	0	0	0	0	0	0
Otu00523	Bacteria;Actinobacteria;Actinobacteria;Coriobacteriales;Coriobacteriaceae;Senegalimassilia	0	0	0	5	2	36	0	0	6	7	39	0	3	3	2	17	6	0	7	2	15	0	0	0	0	0	0	0	0	0	0	0	1	0	0	2	0	10	1	3	0	0
Otu00524	Bacteria;Firmicutes;Clostridia;Clostridiales;Lachnospiraceae;Clostridium XlVb	0	4	12	7	15	0	0	11	2	6	0	0	6	15	9	8	4	5	3	4	0	0	0	0	2	0	0	0	3	2	1	0	1	8	30	0	1	0	1	0	0	7
Otu00525	Bacteria;Firmicutes;Clostridia;Clostridiales;Lachnospiraceae;Roseburia	0	4	0	7	0	0	0	0	13	40	0	0	0	1	2	6	0	0	0	3	0	0	0	11	0	0	0	0	3	1	16	0	0	3	24	0	2	0	0	12	0	19
Otu00526	Bacteria;Firmicutes;Clostridia;Clostridiales;Ruminococcaceae;unclassified_Ruminococcaceae	0	0	0	0	0	0	0	0	74	0	0	0	4	0	0	0	0	0	0	3	0	0	3	0	0	0	0	0	0	0	73	0	2	0	0	0	7	1	0	0	0	0
Otu00527	Bacteria;Elusimicrobia;Elusimicrobia;Elusimicrobiales;Elusimicrobiaceae;Elusimicrobium	0	0	0	0	0	0	0	0	0	0	0	0	0	0	0	0	0	0	0	0	0	0	0	0	0	0	0	0	0	0	0	0	0	166	0	0	0	0	0	0	0	0
Otu00528	Bacteria;Firmicutes;Clostridia;Clostridiales;Lachnospiraceae;Lachnospiracea_incertae_sedis	2	1	0	0	5	2	2	8	11	5	0	0	3	11	10	24	2	2	22	1	9	0	1	0	0	0	1	2	3	10	2	1	3	3	7	1	1	0	1	1	5	3
Otu00529	Bacteria;Firmicutes;Clostridia;Clostridiales;Lachnospiraceae;unclassified_Lachnospiraceae	52	0	0	0	2	0	7	26	0	1	0	0	0	7	5	6	1	1	14	2	13	0	1	0	0	0	2	0	1	2	0	0	3	8	6	0	1	1	1	0	0	2
Otu00530	Bacteria;Proteobacteria;Betaproteobacteria;Burkholderiales;Sutterellaceae;Parasutterella	0	0	0	0	0	0	0	9	0	0	0	0	0	0	0	0	0	0	4	0	10	0	0	0	0	1	0	5	18	82	0	17	0	1	17	0	0	0	1	0	0	0
Otu00531	Bacteria;Bacteroidetes;Bacteroidia;Bacteroidales;Prevotellaceae;unclassified_Prevotellaceae	0	0	0	26	5	0	0	0	0	30	0	0	4	8	0	7	39	0	0	0	0	0	0	0	0	0	0	0	0	0	46	0	0	0	0	0	0	0	0	0	0	0
Otu00532	Bacteria;Bacteroidetes;Bacteroidia;Bacteroidales;Prevotellaceae;Prevotella	0	0	0	16	12	0	0	0	0	20	0	0	26	4	74	0	13	0	0	0	0	0	0	0	0	0	0	0	0	0	0	0	0	0	0	0	0	0	0	0	0	0
Otu00533	Bacteria;Firmicutes;Clostridia;Clostridiales;unclassified_Clostridiales;	22	3	3	1	2	8	15	4	1	0	0	0	2	0	0	0	0	1	0	7	0	0	0	0	1	0	1	1	0	0	2	0	11	1	51	0	1	0	0	1	25	0
Otu00534	Bacteria;Firmicutes;Clostridia;Clostridiales;Ruminococcaceae;Clostridium IV	2	6	0	0	0	29	2	0	0	0	11	14	0	0	0	0	0	0	21	0	4	0	0	0	0	2	3	2	7	0	0	32	0	16	0	5	0	0	0	0	1	6
Otu00535	Bacteria;Firmicutes;Negativicutes;Selenomonadales;Veillonellaceae;Megamonas	0	0	3	0	0	0	0	0	0	0	0	0	0	0	5	0	10	0	0	0	0	0	0	9	0	0	7	7	0	0	2	0	0	0	0	74	0	0	10	36	0	0
Otu00536	Bacteria;Firmicutes;Negativicutes;Selenomonadales;Acidaminococcaceae;Acidaminococcus	0	0	0	0	0	0	0	0	0	0	0	0	0	0	0	0	0	0	0	0	0	0	0	0	0	0	0	0	0	145	0	0	0	0	0	0	0	0	0	17	0	0
Otu00537	Bacteria;Firmicutes;Clostridia;Clostridiales;Lachnospiraceae;Clostridium XlVa	3	2	8	1	2	5	70	0	1	1	0	0	6	1	1	1	8	5	4	7	3	0	3	1	0	0	0	8	3	4	0	1	0	3	0	0	5	0	0	0	3	2
Otu00538	Bacteria;Bacteroidetes;Bacteroidia;Bacteroidales;Rikenellaceae;Alistipes	0	0	0	0	0	2	0	9	0	0	8	114	0	0	0	0	0	0	26	0	0	0	0	0	0	0	0	0	0	0	0	0	0	3	0	0	0	0	0	0	0	0
Otu00539	Bacteria;Firmicutes;Clostridia;Clostridiales;Lachnospiraceae;unclassified_Lachnospiraceae	6	3	0	1	3	1	13	14	24	4	0	0	1	7	15	4	0	4	4	6	2	4	0	0	0	0	0	1	4	8	0	0	9	10	8	0	2	0	0	1	0	2
Otu00540	Bacteria;Firmicutes;Negativicutes;Selenomonadales;Veillonellaceae;Megamonas	0	4	1	0	0	0	0	0	0	0	0	0	0	0	1	2	0	0	0	0	0	12	5	15	10	21	14	26	0	0	1	0	1	2	0	4	0	13	22	7	0	0
Otu00541	Bacteria;Firmicutes;Bacilli;Lactobacillales;unclassified_Lactobacillales;	0	0	0	0	0	0	0	0	0	0	0	0	0	0	0	0	0	0	0	0	0	0	0	0	0	0	0	0	0	0	0	0	0	0	0	0	161	0	0	0	0	0
Otu00542	Bacteria;Firmicutes;Clostridia;Clostridiales;Ruminococcaceae;Clostridium IV	0	0	0	0	43	0	0	4	0	39	39	0	0	23	9	3	0	0	0	0	0	0	0	0	0	0	0	0	0	0	0	0	0	0	0	0	0	0	0	0	0	0
Otu00543	Bacteria;Bacteroidetes;Bacteroidia;Bacteroidales;Porphyromonadaceae;Odoribacter	1	0	1	1	9	2	0	6	12	2	8	22	5	22	7	22	0	0	0	0	11	0	1	6	1	0	0	0	3	0	1	0	2	3	0	0	0	1	0	0	2	8
Otu00544	Bacteria;Bacteroidetes;Bacteroidia;Bacteroidales;Prevotellaceae;Alloprevotella	0	0	0	0	34	0	0	0	0	0	32	0	2	91	0	0	0	0	0	0	0	0	0	0	0	0	0	0	0	0	0	0	0	0	0	0	0	0	0	0	0	0
Otu00545	Bacteria;unclassified_Bacteria;;;;	0	1	0	0	0	0	0	0	4	0	0	0	0	0	3	0	0	0	0	44	0	0	3	0	0	16	0	0	44	0	1	0	0	0	0	0	17	0	0	3	21	0
Otu00546	Bacteria;Firmicutes;Clostridia;Clostridiales;Lachnospiraceae;Roseburia	0	4	3	1	0	0	0	0	0	0	0	0	0	0	5	6	7	2	0	0	0	0	1	6	23	0	11	22	0	5	2	0	12	6	0	24	0	9	1	7	0	0
Otu00547	Bacteria;Firmicutes;unclassified_Firmicutes;;;	0	1	0	0	0	1	0	0	8	0	0	0	0	0	0	0	0	5	2	0	0	0	0	0	0	0	0	0	0	0	1	0	123	0	11	0	0	0	0	0	2	2
Otu00548	Bacteria;Firmicutes;Negativicutes;Selenomonadales;Veillonellaceae;Megamonas	0	0	1	0	0	0	0	0	0	0	0	0	0	0	0	1	0	0	0	0	0	29	3	8	10	64	5	18	0	1	0	0	1	0	0	5	0	0	1	9	0	0
Otu00549	Bacteria;Bacteroidetes;Bacteroidia;Bacteroidales;Bacteroidaceae;Bacteroides	0	0	0	0	0	0	0	0	0	0	0	0	0	0	0	0	0	0	0	0	0	148	0	0	0	0	0	0	0	8	0	0	0	0	0	0	0	0	0	0	0	0
Otu00550	Bacteria;Firmicutes;Clostridia;Clostridiales;unclassified_Clostridiales;	0	0	0	0	0	45	0	52	2	0	27	0	0	0	11	0	0	0	6	6	0	0	0	0	0	0	0	0	0	0	0	0	0	0	6	0	0	0	0	0	0	0
Otu00551	Bacteria;unclassified_Bacteria;;;;	0	0	0	0	4	0	0	0	0	0	0	0	5	0	0	0	0	2	0	0	0	0	0	64	0	0	64	0	0	0	0	0	0	0	0	0	0	0	0	16	0	0
Otu00552	Bacteria;Firmicutes;Clostridia;Clostridiales;Lachnospiraceae;Howardella	0	0	0	4	5	0	0	0	0	27	52	0	6	19	0	25	2	2	0	0	0	0	0	0	0	0	0	0	0	0	0	0	0	0	0	0	0	4	3	5	0	0
Otu00553	Bacteria;Firmicutes;Clostridia;Clostridiales;Lachnospiraceae;Coprococcus	0	0	0	4	0	7	0	58	0	0	0	0	1	12	53	0	16	0	0	3	0	0	0	0	0	0	0	0	0	0	0	0	0	0	0	0	0	0	0	0	0	0
Otu00554	Bacteria;Firmicutes;Negativicutes;Selenomonadales;Acidaminococcaceae;Phascolarctobacterium	0	0	39	11	0	0	0	0	0	0	0	0	0	0	11	9	3	5	0	0	0	65	0	0	0	0	0	0	0	0	0	0	0	0	0	0	0	0	11	0	0	0
Otu00555	Bacteria;Bacteroidetes;Bacteroidia;Bacteroidales;Bacteroidaceae;Bacteroides	0	0	0	0	0	0	0	0	0	0	0	0	0	0	0	0	0	0	0	0	0	0	0	0	0	0	0	0	0	0	0	0	0	0	0	0	153	0	0	0	0	0
Otu00556	Bacteria;Firmicutes;Clostridia;Clostridiales;Lachnospiraceae;unclassified_Lachnospiraceae	0	3	0	0	19	0	0	22	0	25	7	0	0	5	1	0	0	0	7	44	0	0	0	0	0	0	0	0	0	0	0	0	7	12	0	0	0	0	0	0	0	0
Otu00557	Bacteria;Firmicutes;Clostridia;Clostridiales;Lachnospiraceae;Roseburia	1	1	4	10	5	0	15	8	41	10	0	0	6	2	5	4	2	9	0	8	0	0	2	0	1	0	0	0	0	0	0	0	1	4	3	0	1	0	0	2	6	1
Otu00558	Bacteria;Bacteroidetes;Bacteroidia;Bacteroidales;Prevotellaceae;Prevotella	0	27	9	5	4	0	0	0	0	0	0	0	1	2	43	17	2	1	0	0	0	0	0	4	0	0	1	0	0	0	2	0	0	0	0	0	0	2	20	0	0	11
Otu00559	Bacteria;Firmicutes;unclassified_Firmicutes;;;	0	0	0	0	0	2	4	0	4	0	0	0	0	0	0	0	0	6	0	0	0	0	0	0	0	0	0	0	0	5	0	0	129	0	0	0	0	0	0	0	0	1
Otu00560	Bacteria;Firmicutes;Negativicutes;Selenomonadales;Veillonellaceae;Megamonas	0	2	7	0	0	0	0	0	0	0	0	0	0	0	17	3	5	0	1	0	0	0	0	4	19	2	50	8	0	0	3	0	7	6	0	3	0	6	1	6	0	0
Otu00561	Bacteria;Bacteroidetes;Bacteroidia;Bacteroidales;Bacteroidaceae;Bacteroides	3	2	0	0	1	28	0	1	12	0	7	2	0	0	0	0	0	0	2	23	0	0	0	1	2	4	0	1	1	15	10	4	0	13	0	0	14	0	2	0	0	1
Otu00562	Bacteria;Bacteroidetes;Bacteroidia;Bacteroidales;Prevotellaceae;Prevotella	0	0	0	0	0	0	0	0	0	0	0	0	0	0	0	0	0	0	0	0	0	0	0	0	3	0	0	0	146	0	0	0	0	0	0	0	0	0	0	0	0	0
Otu00563	Bacteria;Bacteroidetes;Bacteroidia;Bacteroidales;Bacteroidaceae;Bacteroides	0	0	0	0	0	0	0	0	0	0	0	0	0	0	0	0	0	0	0	22	0	0	0	0	0	22	0	0	31	0	0	0	0	0	0	0	24	0	0	0	50	0
Otu00564	Bacteria;Bacteroidetes;Bacteroidia;Bacteroidales;Bacteroidaceae;Bacteroides	0	2	0	0	0	13	70	37	0	0	0	0	0	0	3	1	0	0	0	0	4	0	0	0	0	2	0	0	2	0	0	15	0	0	0	0	0	0	0	0	0	0
Otu00565	Bacteria;Firmicutes;Negativicutes;Selenomonadales;Veillonellaceae;Megamonas	0	0	32	5	0	0	0	0	0	0	0	0	0	0	0	7	11	0	8	0	0	0	0	0	0	0	0	42	0	0	0	0	0	0	0	1	0	0	14	29	0	0
Otu00566	Bacteria;Firmicutes;Erysipelotrichia;Erysipelotrichales;Erysipelotrichaceae;Erysipelotrichaceae_incertae_sedis	0	0	0	0	0	2	0	0	0	0	7	129	0	0	0	0	1	0	3	0	0	0	0	0	0	0	0	0	0	0	0	1	1	3	1	0	0	0	0	0	0	0
Otu00567	Bacteria;Firmicutes;Clostridia;Clostridiales;Lachnospiraceae;Lachnospiracea_incertae_sedis	0	0	0	3	0	0	0	29	32	3	0	0	1	0	7	20	1	11	0	0	0	0	0	0	0	0	0	0	0	5	0	0	20	0	13	0	0	0	0	0	0	3
Otu00568	Bacteria;Bacteroidetes;Bacteroidia;Bacteroidales;Bacteroidaceae;Bacteroides	0	0	0	0	0	0	0	0	1	0	0	0	0	0	5	0	0	0	0	1	0	0	0	3	0	0	0	0	113	0	0	0	0	0	0	0	24	0	0	1	0	0
Otu00569	Bacteria;Bacteroidetes;Bacteroidia;Bacteroidales;Bacteroidaceae;Bacteroides	3	0	0	0	1	18	10	0	0	0	1	0	0	0	2	11	0	0	50	0	29	0	0	0	0	0	0	2	1	8	0	1	1	0	2	0	0	0	0	0	2	5
Otu00570	Bacteria;Firmicutes;unclassified_Firmicutes;;;	0	0	0	0	6	0	0	0	0	0	65	0	6	3	0	65	0	2	0	0	0	0	0	0	0	0	0	0	0	0	0	0	0	0	0	0	0	0	0	0	0	0
Otu00571	Bacteria;Firmicutes;Clostridia;Clostridiales;Lachnospiraceae;unclassified_Lachnospiraceae	0	0	0	0	0	0	0	0	0	0	0	0	0	0	0	0	0	0	0	0	0	0	0	0	0	0	0	0	0	147	0	0	0	0	0	0	0	0	0	0	0	0
Otu00572	Bacteria;Fusobacteria;Fusobacteriia;Fusobacteriales;Fusobacteriaceae;unclassified_Fusobacteriaceae	0	0	0	0	0	0	0	0	0	0	0	0	0	0	0	0	0	0	0	0	0	54	0	61	0	18	8	0	0	0	0	2	0	0	0	0	0	0	0	4	0	0
Otu00573	Bacteria;Bacteroidetes;Bacteroidia;Bacteroidales;Bacteroidaceae;Bacteroides	0	0	15	0	4	0	0	0	20	0	0	0	1	0	30	14	0	0	0	0	0	0	3	7	5	0	1	6	0	0	13	0	0	0	0	0	0	2	7	5	0	13
Otu00574	Bacteria;Firmicutes;Clostridia;Clostridiales;Lachnospiraceae;unclassified_Lachnospiraceae	5	2	0	1	6	1	0	2	21	5	0	0	0	3	8	9	7	0	0	5	37	0	1	1	0	0	9	0	6	2	0	0	2	1	1	0	3	1	0	0	0	6
Otu00575	Bacteria;Bacteroidetes;Bacteroidia;Bacteroidales;Rikenellaceae;Alistipes	1	0	0	0	0	3	0	15	0	0	1	106	0	0	0	2	0	0	10	0	1	0	0	0	0	0	0	0	0	0	0	0	0	6	0	0	0	0	0	0	0	0
Otu00576	Bacteria;Firmicutes;Clostridia;Clostridiales;Lachnospiraceae;Roseburia	2	2	1	0	8	4	4	6	38	4	1	0	2	2	2	8	0	1	0	6	0	0	0	0	0	0	0	0	1	14	0	0	1	36	2	0	0	0	0	0	0	0
Otu00577	Bacteria;Firmicutes;Clostridia;Clostridiales;Ruminococcaceae;unclassified_Ruminococcaceae	0	0	0	3	37	1	0	0	3	0	22	0	10	28	2	28	0	0	0	10	0	0	0	0	0	0	0	0	0	0	0	0	0	1	0	0	0	0	0	0	0	0
Otu00578	Bacteria;Bacteroidetes;Bacteroidia;Bacteroidales;Rikenellaceae;Alistipes	0	0	0	0	0	0	0	0	0	0	1	116	0	0	0	1	0	0	27	0	0	0	0	0	0	0	0	0	0	0	0	0	0	0	0	0	0	0	0	0	0	0
Otu00579	Bacteria;Bacteroidetes;Bacteroidia;Bacteroidales;unclassified_Bacteroidales;	0	0	0	0	0	0	0	0	0	0	0	0	0	0	0	0	0	0	0	0	0	0	0	0	0	0	0	0	0	0	0	0	0	0	0	0	145	0	0	0	0	0
Otu00580	Bacteria;Bacteroidetes;Bacteroidia;Bacteroidales;Bacteroidaceae;Bacteroides	0	0	0	0	0	0	0	0	0	0	0	0	0	0	2	0	0	0	0	0	0	0	0	0	0	0	0	0	0	0	1	0	0	0	0	0	141	0	0	0	0	0
Otu00581	Bacteria;Bacteroidetes;Bacteroidia;Bacteroidales;Prevotellaceae;Prevotella	0	0	0	26	6	0	0	0	3	28	0	0	8	21	0	3	19	5	0	0	0	0	0	0	15	0	0	0	0	0	9	0	0	0	0	0	0	1	0	0	0	0
Otu00582	Bacteria;Bacteroidetes;Bacteroidia;Bacteroidales;Prevotellaceae;Prevotella	0	0	0	0	10	0	0	0	0	86	0	0	21	27	0	0	0	0	0	0	0	0	0	0	0	0	0	0	0	0	0	0	0	0	0	0	0	0	0	0	0	0
Otu00583	Bacteria;Firmicutes;Clostridia;Clostridiales;Ruminococcaceae;Faecalibacterium	0	3	0	0	0	0	0	0	0	0	0	0	0	0	6	6	8	0	2	0	0	13	4	0	2	0	4	24	0	0	2	0	6	6	0	2	0	44	0	11	0	0
Otu00584	Bacteria;Bacteroidetes;Bacteroidia;Bacteroidales;Rikenellaceae;Alistipes	0	0	0	0	0	17	0	11	0	0	4	45	0	0	0	0	0	0	60	0	0	0	0	0	0	0	0	0	0	0	0	0	0	6	0	0	0	0	0	0	0	0
Otu00585	Bacteria;Firmicutes;Clostridia;Clostridiales;Lachnospiraceae;unclassified_Lachnospiraceae	2	0	2	10	9	1	0	3	5	17	0	0	3	5	27	10	6	1	2	5	7	0	0	0	2	0	0	1	0	0	2	0	0	3	1	0	0	0	0	0	1	18
Otu00586	Bacteria;Firmicutes;Clostridia;Clostridiales;Lachnospiraceae;unclassified_Lachnospiraceae	3	0	10	1	0	3	0	0	0	0	0	0	0	0	4	1	0	1	0	0	0	0	7	5	15	0	53	1	0	0	0	0	9	5	2	0	0	4	0	18	0	1
Otu00587	Bacteria;Firmicutes;Negativicutes;Selenomonadales;Veillonellaceae;Megamonas	0	0	0	0	0	0	0	0	0	0	0	0	0	0	0	0	1	0	0	0	0	57	0	50	0	17	6	0	0	0	5	0	0	0	0	0	0	2	0	5	0	0
Otu00588	Bacteria;Firmicutes;Clostridia;Clostridiales;unclassified_Clostridiales;	0	0	0	0	33	0	0	0	0	0	69	0	0	27	10	0	0	0	0	0	0	0	0	0	0	0	0	0	0	0	3	0	0	0	0	0	0	0	0	0	0	0
Otu00589	Bacteria;Firmicutes;Clostridia;Clostridiales;unclassified_Clostridiales;	17	0	4	0	2	1	9	20	5	1	0	0	0	0	11	5	0	0	0	0	0	0	0	0	0	0	0	0	0	25	0	12	1	13	14	0	0	1	0	0	1	0
Otu00590	Bacteria;Bacteroidetes;Bacteroidia;Bacteroidales;Prevotellaceae;Prevotella	0	4	5	15	3	0	0	0	0	3	0	0	11	6	5	2	6	7	0	0	1	0	6	4	3	0	7	2	0	0	7	0	0	0	0	14	0	10	13	4	0	4
Otu00591	Bacteria;Bacteroidetes;Bacteroidia;Bacteroidales;Prevotellaceae;Prevotella	0	0	0	0	0	0	0	0	0	0	0	0	0	0	0	0	0	0	0	0	0	0	0	0	0	0	0	0	0	0	0	0	0	0	0	0	0	142	0	0	0	0
Otu00592	Bacteria;Firmicutes;Clostridia;Clostridiales;Lachnospiraceae;unclassified_Lachnospiraceae	13	5	10	2	2	2	0	13	9	3	0	1	0	7	4	3	4	9	0	7	26	0	0	1	0	0	1	1	0	0	0	0	3	15	0	0	0	0	0	0	0	0
Otu00593	Bacteria;Actinobacteria;Actinobacteria;Bifidobacteriales;Bifidobacteriaceae;unclassified_Bifidobacteriaceae	3	0	0	0	0	8	0	16	0	0	0	0	0	0	0	5	0	0	0	34	0	0	0	0	0	0	0	0	30	22	0	0	6	8	0	0	0	0	0	0	8	1
Otu00594	Bacteria;Firmicutes;Clostridia;Clostridiales;Lachnospiraceae;Roseburia	0	0	3	1	7	1	2	28	17	3	0	0	8	0	2	5	12	17	1	10	0	0	0	0	0	0	0	0	0	1	1	0	3	5	3	0	3	0	0	0	5	1
Otu00595	Bacteria;Firmicutes;Clostridia;Clostridiales;Lachnospiraceae;unclassified_Lachnospiraceae	12	1	2	2	8	0	5	0	11	7	1	0	0	3	7	10	0	0	5	1	40	0	0	1	0	0	4	1	2	5	4	0	0	0	0	1	3	1	0	2	0	0
Otu00596	Bacteria;Firmicutes;Clostridia;Clostridiales;Lachnospiraceae;Lachnospiracea_incertae_sedis	0	4	0	2	1	0	0	23	17	1	1	0	1	1	14	14	3	7	0	2	0	0	0	0	1	0	2	0	0	3	2	0	22	0	16	0	0	0	0	0	0	2
Otu00597	Bacteria;Firmicutes;Negativicutes;Selenomonadales;Veillonellaceae;Mitsuokella	0	0	0	0	0	0	0	0	0	0	0	0	44	8	0	0	87	0	0	0	0	0	0	0	0	0	0	0	0	0	0	0	0	0	0	0	0	0	0	0	0	0
Otu00598	Bacteria;Firmicutes;Clostridia;Clostridiales;Lachnospiraceae;unclassified_Lachnospiraceae	0	0	0	5	8	0	0	0	0	0	2	0	0	15	19	67	2	0	0	0	0	0	0	0	0	0	0	0	0	0	0	0	0	2	0	0	0	7	0	0	0	12
Otu00599	Bacteria;Firmicutes;Clostridia;Clostridiales;Lachnospiraceae;unclassified_Lachnospiraceae	2	0	0	0	0	0	0	0	0	0	0	0	0	0	1	0	0	0	0	0	4	1	0	2	0	65	27	1	0	0	0	34	1	0	0	0	0	0	0	0	0	0
Otu00600	Bacteria;Firmicutes;Clostridia;Clostridiales;Lachnospiraceae;unclassified_Lachnospiraceae	0	2	4	1	4	0	25	4	10	6	1	0	0	4	3	4	1	2	0	1	34	0	0	0	0	0	2	2	7	2	2	1	1	4	1	1	0	1	0	1	2	5
Otu00601	Bacteria;Bacteroidetes;Bacteroidia;Bacteroidales;Prevotellaceae;Prevotella	0	6	14	5	5	0	0	0	0	7	0	0	4	2	9	5	7	5	0	0	0	0	12	5	6	0	4	4	0	0	11	0	0	1	0	5	0	4	9	1	0	7
Otu00602	Bacteria;Bacteroidetes;Bacteroidia;Bacteroidales;Bacteroidaceae;Bacteroides	0	61	4	0	0	0	0	0	0	0	0	0	0	0	0	0	0	0	0	0	0	0	34	0	9	0	0	0	0	0	0	0	0	0	0	30	0	0	0	0	0	0
Otu00603	Bacteria;Firmicutes;Clostridia;Clostridiales;Lachnospiraceae;unclassified_Lachnospiraceae	5	0	1	3	4	5	5	9	4	3	3	0	1	1	0	4	0	1	7	5	9	0	4	0	0	0	0	0	4	16	1	0	1	25	5	0	0	0	1	3	5	2
Otu00604	Bacteria;Firmicutes;Erysipelotrichia;Erysipelotrichales;Erysipelotrichaceae;Holdemanella	0	0	0	0	3	0	0	0	76	0	0	0	1	1	32	4	7	0	0	1	12	0	0	0	0	0	0	0	0	0	0	0	0	0	0	0	0	0	0	0	0	0
Otu00605	Bacteria;Firmicutes;unclassified_Firmicutes;;;	0	0	0	0	0	0	0	0	6	0	0	0	0	0	0	0	0	0	0	0	0	0	0	0	0	0	0	0	0	2	0	0	129	0	0	0	0	0	0	0	0	0
Otu00606	Bacteria;Firmicutes;Negativicutes;Selenomonadales;Veillonellaceae;unclassified_Veillonellaceae	0	0	0	0	0	0	0	0	0	0	0	0	0	0	0	0	0	0	0	0	0	0	21	14	28	0	0	0	0	5	13	0	0	21	0	11	0	12	0	12	0	0
Otu00607	Bacteria;Firmicutes;Negativicutes;Selenomonadales;unclassified_Selenomonadales;	0	0	40	4	0	0	0	0	0	0	0	0	0	0	10	13	3	1	0	0	0	43	0	0	0	0	0	0	0	0	0	0	0	0	0	0	0	0	23	0	0	0
Otu00608	Bacteria;Firmicutes;Clostridia;Clostridiales;Lachnospiraceae;unclassified_Lachnospiraceae	18	0	1	0	0	4	41	0	13	0	0	0	0	0	0	2	0	1	1	0	19	2	0	1	0	0	13	1	0	3	0	3	1	1	0	0	3	0	0	0	8	0
Otu00609	Bacteria;Firmicutes;Clostridia;Clostridiales;Lachnospiraceae;unclassified_Lachnospiraceae	5	7	2	1	14	5	0	25	1	12	0	12	1	7	1	6	1	0	0	7	2	0	0	0	1	0	0	0	4	0	1	0	3	10	6	0	0	0	1	0	1	0
Otu00610	Bacteria;Bacteroidetes;Bacteroidia;Bacteroidales;Bacteroidaceae;Bacteroides	0	0	0	0	0	0	0	0	0	0	0	0	0	0	0	0	0	0	0	27	0	0	0	0	0	11	0	0	28	0	0	0	0	0	0	0	25	0	0	2	43	0
Otu00611	Bacteria;Bacteroidetes;Bacteroidia;Bacteroidales;Prevotellaceae;Prevotella	0	0	0	0	0	0	0	0	0	38	0	0	0	23	5	0	0	0	0	0	0	0	0	0	0	0	0	0	0	0	0	0	0	0	0	0	0	70	0	0	0	0
Otu00612	Bacteria;Firmicutes;Clostridia;Clostridiales;Lachnospiraceae;unclassified_Lachnospiraceae	0	6	4	2	4	0	0	10	8	18	1	0	3	9	6	30	3	1	9	3	0	0	0	7	0	0	0	0	2	0	2	0	2	0	0	0	0	1	0	0	0	4
Otu00613	Bacteria;Bacteroidetes;Bacteroidia;Bacteroidales;Prevotellaceae;Prevotella	0	9	0	0	0	0	0	0	0	0	0	0	0	0	17	0	0	0	0	0	0	0	29	17	22	0	0	0	0	0	5	0	0	0	0	0	0	0	9	27	0	0
Otu00614	Bacteria;Firmicutes;Clostridia;Clostridiales;Lachnospiraceae;unclassified_Lachnospiraceae	16	3	12	1	2	0	0	3	6	5	0	0	2	1	1	4	0	2	0	3	0	0	5	0	1	0	0	0	0	0	1	0	0	0	2	0	4	1	0	1	54	5
Otu00615	Bacteria;Firmicutes;Negativicutes;Selenomonadales;Veillonellaceae;Megamonas	0	7	0	0	0	0	0	0	0	0	0	0	0	0	0	0	0	0	0	0	0	0	14	20	48	0	0	0	0	0	2	0	0	8	0	16	0	18	0	2	0	0
Otu00616	Bacteria;Bacteroidetes;Bacteroidia;Bacteroidales;Bacteroidaceae;Bacteroides	0	0	0	0	0	0	0	0	0	0	0	0	0	0	0	0	0	0	0	0	0	132	0	0	0	0	0	0	0	3	0	0	0	0	0	0	0	0	0	0	0	0
Otu00617	Bacteria;Bacteroidetes;Bacteroidia;Bacteroidales;unclassified_Bacteroidales;	0	48	11	0	0	0	0	0	0	0	0	0	0	0	0	0	0	0	0	0	0	0	32	0	7	0	8	0	0	0	1	0	0	0	0	28	0	0	0	0	0	0
Otu00618	Bacteria;Proteobacteria;Gammaproteobacteria;Aeromonadales;Succinivibrionaceae;Succinivibrio	0	0	0	0	0	0	0	0	0	0	0	0	2	96	0	0	37	0	0	0	0	0	0	0	0	0	0	0	0	0	0	0	0	0	0	0	0	0	0	0	0	0
Otu00619	Bacteria;Bacteroidetes;Bacteroidia;Bacteroidales;Prevotellaceae;Prevotella	0	0	0	0	0	0	0	0	0	36	0	0	29	22	0	0	45	0	0	0	0	0	0	0	0	0	0	0	0	0	0	0	0	0	0	0	0	1	0	0	0	0
Otu00620	Bacteria;Bacteroidetes;Bacteroidia;Bacteroidales;unclassified_Bacteroidales;	0	33	9	4	0	0	0	0	1	1	0	0	0	0	3	7	0	10	0	0	0	0	1	7	4	0	1	26	0	0	3	0	0	0	0	0	0	3	7	1	0	12
Otu00621	Bacteria;Firmicutes;Clostridia;Clostridiales;Ruminococcaceae;unclassified_Ruminococcaceae	3	2	1	2	7	0	0	0	22	8	3	0	3	0	0	3	1	0	17	3	2	7	0	1	0	0	0	0	4	1	0	33	0	0	0	0	0	1	0	0	8	0
Otu00622	Bacteria;Bacteroidetes;Bacteroidia;Bacteroidales;Bacteroidaceae;Bacteroides	0	13	0	0	0	0	0	0	2	0	0	0	0	0	17	0	0	0	0	3	0	0	23	11	0	2	0	0	7	0	2	0	0	0	10	0	16	0	0	2	24	0
Otu00623	Bacteria;Firmicutes;Clostridia;Clostridiales;Lachnospiraceae;Blautia	9	3	8	1	1	5	0	33	2	1	0	2	1	10	2	0	3	7	5	14	14	0	0	0	0	0	0	0	0	0	1	0	2	7	1	0	0	0	0	0	0	0
Otu00624	Bacteria;Bacteroidetes;Bacteroidia;Bacteroidales;Bacteroidaceae;Bacteroides	0	99	8	0	0	0	0	0	0	0	0	0	0	0	0	0	0	0	0	0	0	0	2	0	2	0	0	0	0	0	0	0	0	0	0	0	0	0	0	0	21	0
Otu00625	Bacteria;Firmicutes;Clostridia;Clostridiales;Lachnospiraceae;unclassified_Lachnospiraceae	1	0	0	4	4	0	3	0	6	2	0	0	2	0	2	2	0	6	0	2	3	0	0	0	0	0	0	0	0	4	0	0	3	2	2	0	1	0	0	0	73	9
Otu00626	Bacteria;Bacteroidetes;Bacteroidia;Bacteroidales;Porphyromonadaceae;Butyricimonas	0	0	0	0	1	1	0	3	0	0	7	47	1	2	0	0	0	0	0	3	5	0	0	1	1	0	0	0	1	0	3	0	1	51	0	0	1	1	0	0	0	0
Otu00627	Bacteria;Firmicutes;Negativicutes;Selenomonadales;Veillonellaceae;Megamonas	0	7	13	0	0	0	0	0	0	0	0	0	0	0	2	6	8	0	0	0	0	0	1	24	6	0	5	1	0	0	1	0	1	25	0	19	0	4	4	3	0	0
Otu00628	Bacteria;Bacteroidetes;Bacteroidia;Bacteroidales;Bacteroidaceae;Bacteroides	0	0	0	0	0	0	0	0	0	0	0	0	0	0	0	0	0	0	0	0	0	0	0	0	0	0	0	0	0	0	0	0	0	0	0	0	130	0	0	0	0	0
Otu00629	Bacteria;Bacteroidetes;Bacteroidia;Bacteroidales;Prevotellaceae;Prevotella	0	0	0	0	0	0	0	0	0	91	0	0	1	2	28	0	2	0	0	0	0	0	0	0	0	0	0	0	0	0	0	0	0	0	0	0	0	6	0	0	0	0
Otu00630	Bacteria;Firmicutes;Negativicutes;Selenomonadales;Veillonellaceae;Megasphaera	0	0	0	0	0	0	0	0	0	0	0	0	68	0	0	0	60	0	0	0	0	0	0	0	0	0	0	0	1	0	0	0	0	0	0	0	0	0	0	0	0	0
Otu00631	Bacteria;Firmicutes;Clostridia;Clostridiales;Lachnospiraceae;unclassified_Lachnospiraceae	5	3	2	1	2	1	6	5	0	0	0	0	1	2	8	1	3	0	1	5	36	0	4	1	0	0	5	2	4	3	0	3	0	1	2	0	6	0	1	1	7	7
Otu00632	Bacteria;unclassified_Bacteria;;;;	0	0	0	0	4	31	0	0	1	9	35	4	1	5	2	8	1	0	26	1	0	0	0	0	0	0	0	0	0	0	0	0	0	0	0	0	0	1	0	0	0	0
Otu00633	Bacteria;Bacteroidetes;Bacteroidia;Bacteroidales;Prevotellaceae;Prevotella	0	0	0	13	6	0	0	0	2	8	0	0	13	17	0	1	14	5	0	0	0	0	0	0	15	0	0	0	0	0	16	0	0	0	0	0	0	19	0	0	0	0
Otu00634	Bacteria;Firmicutes;Clostridia;Clostridiales;Ruminococcaceae;unclassified_Ruminococcaceae	0	0	0	1	4	7	0	4	2	25	8	1	7	16	4	42	0	0	7	0	0	0	0	0	0	0	0	0	0	0	0	0	0	0	0	0	0	0	0	0	0	0
Otu00635	Bacteria;Firmicutes;unclassified_Firmicutes;;;	0	3	0	0	0	0	0	0	0	0	0	0	0	0	2	4	0	0	5	0	0	0	0	0	0	0	89	0	0	0	0	0	0	9	0	0	0	0	0	16	0	0
Otu00636	Bacteria;Firmicutes;Clostridia;Clostridiales;Lachnospiraceae;Roseburia	0	0	0	0	0	3	42	8	7	0	0	0	0	0	1	2	0	0	2	11	0	0	0	0	1	0	1	2	10	14	1	0	5	2	11	1	1	0	0	0	0	2
Otu00637	Bacteria;Firmicutes;Erysipelotrichia;Erysipelotrichales;Erysipelotrichaceae;Clostridium XVIII	0	0	0	0	0	0	0	0	0	0	2	85	0	0	0	0	0	0	13	0	2	12	0	0	0	4	2	0	0	0	0	5	0	0	1	0	0	0	0	0	0	0
Otu00638	Bacteria;Firmicutes;Bacilli;Lactobacillales;Enterococcaceae;Enterococcus	0	1	0	0	0	0	0	0	1	63	0	3	0	12	0	0	1	0	0	0	0	1	0	16	0	0	0	0	0	0	0	0	0	25	0	0	3	0	0	0	0	0
Otu00639	Bacteria;Firmicutes;Clostridia;Clostridiales;Lachnospiraceae;Clostridium XlVb	0	2	0	1	8	12	0	0	9	9	5	0	1	6	8	18	1	2	0	1	14	0	0	0	3	0	0	0	0	0	0	0	2	12	0	0	2	2	0	0	0	8
Otu00640	Bacteria;Bacteroidetes;Bacteroidia;Bacteroidales;Bacteroidaceae;Bacteroides	0	0	0	0	0	0	0	0	0	0	0	0	0	0	0	0	0	0	0	23	0	0	0	1	0	3	0	0	72	0	0	0	0	0	0	0	8	0	0	0	19	0
Otu00641	Bacteria;Firmicutes;Clostridia;Clostridiales;Ruminococcaceae;unclassified_Ruminococcaceae	0	0	0	6	44	0	0	0	4	19	0	0	1	15	4	24	1	0	0	3	0	0	0	0	0	0	0	0	0	0	1	0	0	3	0	0	0	1	0	0	0	0
Otu00642	Bacteria;Bacteroidetes;Bacteroidia;Bacteroidales;Bacteroidaceae;Bacteroides	0	0	0	0	0	0	0	0	0	0	0	0	0	0	0	0	0	0	0	0	0	118	0	0	0	0	0	0	0	8	0	0	0	0	0	0	0	0	0	0	0	0
Otu00643	Bacteria;Bacteroidetes;Bacteroidia;Bacteroidales;Bacteroidaceae;Bacteroides	0	10	8	0	0	0	0	0	0	0	0	0	0	0	1	1	0	2	0	0	2	0	0	2	0	0	0	73	0	0	0	0	0	1	0	0	0	0	0	3	0	23
Otu00644	Bacteria;Firmicutes;Negativicutes;Selenomonadales;Veillonellaceae;Megasphaera	0	0	0	0	0	0	0	0	0	0	0	0	0	0	0	0	3	0	6	0	0	0	0	29	0	0	0	0	0	0	0	0	0	0	0	0	0	33	54	0	0	0
Otu00645	Bacteria;Firmicutes;unclassified_Firmicutes;;;	0	0	0	0	10	0	0	0	0	0	3	0	9	8	3	91	1	0	0	0	0	0	0	0	0	0	0	0	0	0	0	0	0	0	0	0	0	0	0	0	0	0
Otu00646	Bacteria;Actinobacteria;Actinobacteria;Bifidobacteriales;Bifidobacteriaceae;Bifidobacterium	4	3	1	0	0	33	0	2	1	0	0	15	0	0	0	3	0	1	30	3	4	0	0	0	0	0	0	0	2	0	0	0	1	16	1	0	0	0	2	1	1	0
Otu00647	Bacteria;Firmicutes;Clostridia;Clostridiales;Lachnospiraceae;Roseburia	11	0	8	6	12	0	1	9	16	5	0	0	0	0	5	5	3	0	0	0	0	0	3	0	0	0	0	0	1	1	0	0	0	6	3	0	2	0	0	1	23	3
Otu00648	Bacteria;Firmicutes;Clostridia;Clostridiales;Lachnospiraceae;Roseburia	4	0	3	3	2	0	1	2	10	10	0	0	1	0	4	13	2	1	0	7	0	0	0	0	0	0	0	0	0	0	0	0	0	0	1	0	0	1	0	0	43	16
Otu00649	Bacteria;Firmicutes;Negativicutes;Selenomonadales;Veillonellaceae;Megamonas	0	6	2	0	0	0	0	0	0	0	0	0	0	0	3	1	0	0	3	0	0	1	5	29	10	1	7	13	0	0	5	0	3	15	0	4	0	9	7	0	0	0
Otu00650	Bacteria;Bacteroidetes;Bacteroidia;Bacteroidales;Bacteroidaceae;Bacteroides	0	32	4	3	6	0	0	0	0	0	0	0	0	1	0	15	0	1	0	0	4	0	0	4	0	0	0	39	0	0	2	0	0	0	0	0	0	2	2	0	0	9
Otu00651	Bacteria;Proteobacteria;Gammaproteobacteria;Enterobacteriales;Enterobacteriaceae;unclassified_Enterobacteriaceae	0	0	0	0	1	1	1	0	1	23	0	13	0	0	0	0	8	0	0	1	0	41	0	4	0	1	3	0	0	3	15	5	0	1	0	0	0	0	0	1	0	0
Otu00652	Bacteria;Firmicutes;Clostridia;Clostridiales;Lachnospiraceae;Roseburia	2	0	1	8	4	0	10	3	24	3	0	0	1	2	5	5	2	0	0	9	0	0	0	0	3	0	0	0	0	1	1	0	0	1	1	0	10	0	0	0	22	5
Otu00653	Bacteria;Firmicutes;Erysipelotrichia;Erysipelotrichales;Erysipelotrichaceae;Turicibacter	0	0	0	1	33	16	0	0	1	0	31	24	2	1	0	1	1	0	0	2	0	0	0	0	0	1	0	0	0	0	0	0	0	9	0	0	0	0	0	0	0	0
Otu00654	Bacteria;Firmicutes;Clostridia;Clostridiales;Ruminococcaceae;Ruminococcus	0	0	0	0	4	19	0	29	0	0	39	0	0	0	5	0	0	0	26	1	0	0	0	0	0	0	0	0	0	0	0	0	0	0	0	0	0	0	0	0	0	0
Otu00655	Bacteria;Firmicutes;Clostridia;Clostridiales;Clostridiaceae 1;Clostridium sensu stricto	0	0	0	0	25	25	0	0	0	0	2	61	0	2	0	1	1	0	1	0	0	0	0	0	0	0	1	0	0	3	0	0	0	1	0	0	0	0	0	0	0	0
Otu00656	Bacteria;Firmicutes;Negativicutes;Selenomonadales;Veillonellaceae;unclassified_Veillonellaceae	0	0	0	0	0	0	0	0	0	0	0	0	0	0	0	0	42	0	0	0	0	0	58	0	0	0	0	0	0	0	0	0	0	0	0	0	0	23	0	0	0	0
Otu00657	Bacteria;Bacteroidetes;Bacteroidia;Bacteroidales;Prevotellaceae;unclassified_Prevotellaceae	0	0	0	0	0	0	0	0	0	12	0	0	2	0	0	0	17	0	0	0	1	0	0	39	0	0	1	0	0	0	48	0	0	1	0	0	0	0	0	2	0	0
Otu00658	Bacteria;Firmicutes;Clostridia;Clostridiales;Lachnospiraceae;Blautia	10	1	4	1	2	3	0	19	5	2	0	1	4	13	5	1	4	11	3	6	17	3	0	0	1	0	0	0	1	0	0	0	0	3	2	0	0	0	0	0	0	0
Otu00659	Bacteria;Firmicutes;Clostridia;Clostridiales;Lachnospiraceae;unclassified_Lachnospiraceae	1	0	1	6	2	0	0	1	4	22	0	1	3	0	12	20	8	0	0	19	0	0	0	0	1	0	0	0	0	0	3	0	0	1	2	0	2	0	0	0	2	11
Otu00660	Bacteria;Firmicutes;Clostridia;Clostridiales;unclassified_Clostridiales;	2	0	12	2	2	0	2	1	7	1	0	0	1	0	0	0	0	1	0	2	0	0	0	0	1	0	0	0	0	0	0	0	0	3	3	0	4	1	0	0	58	18
Otu00661	Bacteria;Firmicutes;Clostridia;Clostridiales;Lachnospiraceae;unclassified_Lachnospiraceae	13	6	0	4	7	0	0	2	1	9	0	0	2	6	4	5	1	2	7	4	9	0	1	0	0	0	0	0	2	0	1	1	1	4	2	0	1	2	4	2	11	7
Otu00662	Bacteria;Bacteroidetes;Bacteroidia;Bacteroidales;Bacteroidaceae;Bacteroides	0	0	0	23	20	0	0	0	0	19	0	0	14	9	0	0	36	0	0	0	0	0	0	0	0	0	0	0	0	0	0	0	0	0	0	0	0	0	0	0	0	0
Otu00663	Bacteria;Bacteroidetes;Bacteroidia;Bacteroidales;Bacteroidaceae;Bacteroides	0	0	0	0	0	35	1	6	0	0	0	12	0	0	0	1	0	0	64	0	0	0	0	0	0	0	0	0	1	0	0	0	0	0	0	0	0	0	0	0	0	0
Otu00664	Bacteria;Firmicutes;Clostridia;Clostridiales;Lachnospiraceae;Blautia	19	1	2	1	4	0	5	2	1	1	1	15	2	14	3	1	2	2	4	0	23	0	1	0	0	0	0	0	2	0	1	2	0	2	3	0	0	1	0	2	3	0
Otu00665	Bacteria;Firmicutes;Clostridia;Clostridiales;Lachnospiraceae;Lachnospiracea_incertae_sedis	0	3	0	3	3	0	0	19	11	4	1	3	0	3	9	42	0	3	0	1	0	0	0	1	1	0	1	0	0	0	0	0	1	0	1	0	1	0	0	0	0	9
Otu00666	Bacteria;Bacteroidetes;Bacteroidia;Bacteroidales;Prevotellaceae;Prevotella	0	11	0	5	0	0	0	0	2	2	0	0	1	0	49	0	1	8	0	0	6	0	0	13	21	0	0	0	0	0	0	0	0	0	0	0	0	1	0	0	0	0
Otu00667	Bacteria;Proteobacteria;Gammaproteobacteria;Enterobacteriales;Enterobacteriaceae;unclassified_Enterobacteriaceae	0	0	0	0	0	0	0	0	0	0	0	0	0	0	0	0	3	0	0	0	0	117	0	0	0	0	0	0	0	0	0	0	0	0	0	0	0	0	0	0	0	0
Otu00668	Bacteria;Firmicutes;Negativicutes;Selenomonadales;Veillonellaceae;Megamonas	0	0	0	0	0	0	0	0	0	0	0	0	0	0	0	0	0	0	0	0	0	0	0	71	0	0	0	0	0	0	0	0	0	0	0	0	0	0	2	47	0	0
Otu00669	Bacteria;Bacteroidetes;Bacteroidia;Bacteroidales;Bacteroidaceae;Bacteroides	6	0	0	0	0	12	35	2	0	0	0	0	0	0	0	0	0	0	14	0	0	3	0	0	0	0	0	3	3	25	0	2	0	7	4	0	0	0	0	0	3	0
Otu00670	Bacteria;Bacteroidetes;Bacteroidia;Bacteroidales;Bacteroidaceae;Bacteroides	0	0	0	0	0	0	0	0	0	0	0	0	0	0	0	0	1	0	0	26	0	0	26	2	6	21	0	0	18	0	0	0	0	0	0	0	0	0	0	4	15	0
Otu00671	Bacteria;Firmicutes;Clostridia;Clostridiales;Lachnospiraceae;unclassified_Lachnospiraceae	3	1	2	3	0	6	19	7	16	9	0	0	1	0	4	3	4	3	3	3	0	0	1	0	3	0	3	1	0	5	1	0	4	10	0	0	1	1	0	0	0	2
Otu00672	Bacteria;Firmicutes;Negativicutes;Selenomonadales;Veillonellaceae;unclassified_Veillonellaceae	0	0	0	0	0	0	0	0	0	0	0	0	9	0	0	0	16	0	0	0	0	0	91	0	0	0	0	0	0	0	0	0	0	0	0	0	0	3	0	0	0	0
Otu00673	Bacteria;Firmicutes;Clostridia;Clostridiales;Lachnospiraceae;Clostridium XlVa	0	0	0	0	4	0	0	0	12	36	0	0	0	8	1	8	0	0	0	3	0	0	0	0	0	0	0	0	0	0	0	0	0	0	0	0	1	0	0	0	0	46
Otu00674	Bacteria;Firmicutes;Clostridia;Clostridiales;unclassified_Clostridiales;	0	0	1	0	0	0	0	0	80	0	1	31	0	0	0	4	0	0	0	1	0	0	0	0	0	0	0	0	0	0	0	0	0	0	0	0	0	0	0	0	0	0
Otu00675	Bacteria;Firmicutes;Clostridia;Clostridiales;Lachnospiraceae;Roseburia	0	0	1	8	0	19	26	5	8	7	0	0	1	1	2	9	0	5	0	0	0	0	0	0	0	0	0	3	1	5	1	0	1	0	13	0	2	0	0	0	0	0
Otu00676	Bacteria;Bacteroidetes;Bacteroidia;Bacteroidales;Bacteroidaceae;Bacteroides	4	0	0	0	0	2	0	4	0	0	2	57	0	0	0	2	0	0	40	0	0	0	0	0	0	0	0	0	0	0	0	1	0	4	0	0	0	0	0	0	1	0
Otu00677	Bacteria;Bacteroidetes;Bacteroidia;Bacteroidales;Bacteroidaceae;Bacteroides	0	0	0	0	0	0	0	0	0	0	0	0	0	0	0	0	0	0	0	19	0	0	0	0	2	0	0	0	41	0	0	0	0	0	2	0	6	0	0	0	47	0
Otu00678	Bacteria;Bacteroidetes;Bacteroidia;Bacteroidales;Porphyromonadaceae;Parabacteroides	3	2	0	0	5	1	7	0	4	0	1	8	0	0	0	7	0	1	0	5	0	12	0	5	1	0	0	0	5	1	0	4	1	3	23	0	0	1	0	0	6	11
Otu00679	Bacteria;Bacteroidetes;Bacteroidia;Bacteroidales;Bacteroidaceae;Bacteroides	0	0	0	0	0	27	0	0	1	0	0	0	0	0	0	0	0	0	0	0	3	0	0	0	0	0	0	0	15	52	0	0	0	19	0	0	0	0	0	0	0	0
Otu00680	Bacteria;Firmicutes;Clostridia;Clostridiales;Lachnospiraceae;unclassified_Lachnospiraceae	7	0	2	0	0	1	47	2	0	1	0	0	0	2	4	1	0	0	0	0	0	0	0	2	2	0	0	0	0	9	0	0	4	0	14	0	3	0	0	0	14	2
Otu00681	Bacteria;Firmicutes;Erysipelotrichia;Erysipelotrichales;Erysipelotrichaceae;Holdemanella	0	0	0	1	12	0	0	0	0	0	57	0	5	15	0	18	3	0	0	2	0	0	0	3	0	0	0	0	0	0	0	0	1	0	0	0	0	0	0	0	0	0
Otu00682	Bacteria;Bacteroidetes;Bacteroidia;Bacteroidales;Prevotellaceae;Prevotella	0	7	3	5	16	0	0	0	1	5	0	0	0	4	3	12	3	2	0	0	1	0	2	7	5	0	0	0	0	0	0	0	0	0	0	0	0	3	0	0	0	38
Otu00683	Bacteria;Actinobacteria;Actinobacteria;Coriobacteriales;Coriobacteriaceae;Collinsella	8	1	0	0	0	2	0	0	0	2	1	0	0	1	23	4	2	0	15	4	26	0	0	0	0	0	0	1	2	1	0	0	0	12	0	0	1	0	0	5	1	4
Otu00684	Bacteria;Firmicutes;Clostridia;Clostridiales;Lachnospiraceae;unclassified_Lachnospiraceae	42	3	2	0	0	3	0	4	0	0	0	0	1	3	2	0	0	0	8	1	29	0	0	0	0	0	0	0	4	1	0	0	1	8	3	0	0	0	0	0	0	1
Otu00685	Bacteria;Firmicutes;Clostridia;Clostridiales;Ruminococcaceae;Faecalibacterium	0	0	0	0	0	0	0	0	2	0	0	0	0	0	0	0	0	5	0	0	0	0	0	0	0	0	0	0	0	0	0	0	102	0	6	0	0	0	0	0	0	1
Otu00686	Bacteria;Bacteroidetes;Bacteroidia;Bacteroidales;Bacteroidaceae;Bacteroides	0	35	16	0	4	0	0	0	2	0	0	0	1	0	6	17	0	1	0	0	7	0	0	4	2	0	0	9	0	0	1	0	0	2	0	0	0	0	0	0	0	9
Otu00687	Bacteria;Firmicutes;Clostridia;Clostridiales;Lachnospiraceae;unclassified_Lachnospiraceae	0	0	0	0	2	20	9	0	27	3	0	0	0	1	1	8	0	1	0	3	0	0	0	0	1	0	0	0	1	27	0	0	6	1	2	0	3	0	0	0	0	0
Otu00688	Bacteria;Bacteroidetes;Bacteroidia;Bacteroidales;Prevotellaceae;Prevotella	0	0	0	0	0	0	0	0	0	41	0	0	24	18	0	0	31	0	0	0	0	0	0	0	0	0	0	0	0	0	0	0	0	0	0	0	0	2	0	0	0	0
Otu00689	Bacteria;Bacteroidetes;Bacteroidia;Bacteroidales;Bacteroidaceae;Bacteroides	0	0	0	0	0	0	0	0	3	0	0	0	0	0	2	0	0	0	0	24	0	0	0	1	0	10	0	0	39	0	1	0	0	0	0	0	2	0	0	0	33	0
Otu00690	Bacteria;Bacteroidetes;Bacteroidia;Bacteroidales;Prevotellaceae;unclassified_Prevotellaceae	0	0	0	28	2	0	0	0	0	7	0	0	19	4	1	2	25	0	0	0	0	0	0	0	0	0	0	0	0	0	27	0	0	0	0	0	0	0	0	0	0	0
Otu00691	Bacteria;Firmicutes;Clostridia;Clostridiales;Lachnospiraceae;Blautia	30	7	2	2	8	0	0	0	2	1	0	0	1	3	3	2	0	1	0	8	13	0	1	0	0	0	0	0	1	0	0	0	4	6	14	0	0	1	0	0	3	1
Otu00692	Bacteria;Firmicutes;Clostridia;Clostridiales;Ruminococcaceae;unclassified_Ruminococcaceae	0	0	2	3	5	25	0	0	7	25	0	0	6	7	4	9	0	0	0	0	10	0	0	0	1	0	0	0	0	0	2	0	0	6	0	0	0	1	0	0	0	1
Otu00693	Bacteria;Firmicutes;Clostridia;Clostridiales;unclassified_Clostridiales;	0	0	0	0	12	0	0	0	0	19	13	0	0	69	1	0	0	0	0	0	0	0	0	0	0	0	0	0	0	0	0	0	0	0	0	0	0	0	0	0	0	0
Otu00694	Bacteria;unclassified_Bacteria;;;;	0	0	0	1	13	0	0	0	6	0	1	0	3	59	6	24	0	0	0	0	0	0	0	0	0	0	0	0	0	0	0	0	0	0	0	0	0	1	0	0	0	0
Otu00695	Bacteria;Bacteroidetes;Bacteroidia;Bacteroidales;Prevotellaceae;Prevotella	0	0	0	6	6	0	0	0	64	5	0	0	3	19	0	0	11	0	0	0	0	0	0	0	0	0	0	0	0	0	0	0	0	0	0	0	0	0	0	0	0	0
Otu00696	Bacteria;Firmicutes;Clostridia;Clostridiales;Lachnospiraceae;unclassified_Lachnospiraceae	0	0	0	0	2	1	59	0	1	1	0	0	1	0	2	2	2	0	0	0	7	0	1	0	0	0	1	0	2	9	0	0	3	0	5	0	1	0	0	1	11	1
Otu00697	Bacteria;Firmicutes;Clostridia;Clostridiales;Lachnospiraceae;unclassified_Lachnospiraceae	0	0	0	0	5	0	0	0	10	2	3	0	1	22	9	11	0	1	0	0	21	0	1	0	0	0	0	0	1	2	11	0	2	0	0	0	8	1	0	1	0	0
Otu00698	Bacteria;unclassified_Bacteria;;;;	0	0	0	0	0	0	0	0	0	0	99	0	0	0	0	0	0	0	1	0	0	0	0	0	0	0	0	0	0	0	0	0	0	12	0	0	0	0	0	0	0	0
Otu00699	Bacteria;Bacteroidetes;Bacteroidia;Bacteroidales;Bacteroidaceae;Bacteroides	0	0	0	0	0	0	0	0	0	0	0	0	0	0	0	0	0	0	0	6	47	0	0	0	0	0	0	10	42	0	0	0	0	6	0	0	0	0	0	1	0	0
Otu00700	Bacteria;unclassified_Bacteria;;;;	0	0	0	0	0	0	0	0	0	0	0	0	0	0	0	0	1	0	0	0	0	53	0	33	0	18	1	0	0	0	4	0	0	0	0	0	0	2	0	0	0	0
Otu00701	Bacteria;Fusobacteria;Fusobacteriia;Fusobacteriales;Fusobacteriaceae;unclassified_Fusobacteriaceae	0	0	0	0	0	0	0	0	0	0	0	0	0	0	0	0	0	0	0	0	0	0	0	5	0	100	0	0	0	0	0	0	0	0	0	0	0	0	0	7	0	0
Otu00702	Bacteria;Firmicutes;Clostridia;Clostridiales;Lachnospiraceae;unclassified_Lachnospiraceae	0	0	0	0	0	0	0	18	0	0	0	21	0	0	0	0	0	0	72	0	0	0	0	0	0	0	0	0	0	0	0	0	0	0	0	0	0	0	0	0	0	0
Otu00703	Bacteria;Firmicutes;Negativicutes;Selenomonadales;Veillonellaceae;Megamonas	0	0	4	0	0	0	0	0	0	0	0	0	0	0	0	0	2	0	0	0	0	0	2	3	2	0	87	1	0	0	0	0	0	2	0	3	0	1	2	2	0	0
Otu00704	Bacteria;Fusobacteria;Fusobacteriia;Fusobacteriales;Fusobacteriaceae;unclassified_Fusobacteriaceae	0	0	0	0	0	0	0	0	0	0	0	0	0	0	0	0	0	0	0	0	0	8	0	22	0	24	32	0	0	0	0	13	0	0	0	0	0	0	0	12	0	0
Otu00705	Bacteria;Bacteroidetes;Bacteroidia;Bacteroidales;Prevotellaceae;Prevotella	0	0	0	0	0	0	0	0	0	0	0	0	0	0	0	0	0	0	0	0	0	0	0	0	0	0	0	0	0	0	0	0	0	0	0	0	0	111	0	0	0	0
Otu00706	Bacteria;Firmicutes;Clostridia;Clostridiales;unclassified_Clostridiales;	0	0	0	0	4	1	0	2	13	16	2	8	3	4	1	50	0	1	3	1	0	0	0	0	0	0	0	0	0	0	0	0	0	0	0	0	0	1	0	0	0	0
Otu00707	Bacteria;Firmicutes;Clostridia;Clostridiales;Lachnospiraceae;unclassified_Lachnospiraceae	9	0	0	0	0	0	11	0	2	0	0	0	0	0	0	0	0	0	0	0	27	13	0	0	0	4	6	1	0	1	0	34	0	0	0	0	1	0	0	0	1	0
Otu00708	Bacteria;Firmicutes;unclassified_Firmicutes;;;	0	0	0	0	0	0	0	0	0	0	105	0	0	5	0	0	0	0	0	0	0	0	0	0	0	0	0	0	0	0	0	0	0	0	0	0	0	0	0	0	0	0
Otu00709	Bacteria;Firmicutes;Clostridia;Clostridiales;unclassified_Clostridiales;	0	0	0	0	33	31	2	0	7	1	0	9	1	0	0	3	0	0	9	0	0	0	0	0	0	0	0	0	1	0	0	0	2	10	0	0	0	0	0	0	0	0
Otu00710	Bacteria;Firmicutes;Clostridia;Clostridiales;Ruminococcaceae;Clostridium IV	0	0	0	0	62	0	0	0	0	38	0	0	0	2	0	7	0	0	0	0	0	0	0	0	0	0	0	0	0	0	0	0	0	0	0	0	0	0	0	0	0	0
Otu00711	Bacteria;Bacteroidetes;Bacteroidia;Bacteroidales;Bacteroidaceae;Bacteroides	0	0	0	0	0	0	0	0	0	0	0	0	0	0	0	0	0	0	0	33	0	0	2	1	0	8	0	0	57	0	0	0	0	0	0	1	0	0	0	7	0	0
Otu00712	Bacteria;Proteobacteria;Deltaproteobacteria;unclassified_Deltaproteobacteria;;	0	0	0	0	3	0	0	0	0	0	44	0	0	5	0	0	57	0	0	0	0	0	0	0	0	0	0	0	0	0	0	0	0	0	0	0	0	0	0	0	0	0
Otu00713	Bacteria;Bacteroidetes;Bacteroidia;Bacteroidales;Bacteroidaceae;Bacteroides	0	3	0	0	0	0	0	0	0	0	0	0	0	0	0	0	0	0	0	29	0	0	0	3	0	5	0	0	21	0	0	0	0	0	0	0	12	0	0	0	35	0
Otu00714	Bacteria;Bacteroidetes;Bacteroidia;Bacteroidales;Bacteroidaceae;Bacteroides	0	7	1	0	4	0	0	0	3	0	0	0	0	5	2	12	0	0	0	0	5	0	0	5	3	0	0	29	0	0	3	0	0	11	0	1	0	1	1	0	0	15
Otu00715	Bacteria;Firmicutes;Clostridia;Clostridiales;Lachnospiraceae;unclassified_Lachnospiraceae	3	0	0	4	3	2	14	3	20	1	0	0	19	4	0	14	0	6	0	3	0	0	0	1	0	0	0	0	3	1	0	0	2	0	4	1	0	0	0	0	0	0
Otu00716	Bacteria;Bacteroidetes;Bacteroidia;Bacteroidales;Prevotellaceae;Prevotella	0	0	1	3	3	0	0	0	0	10	0	0	6	42	1	1	6	0	0	0	0	0	0	0	0	0	6	0	0	0	1	0	0	0	0	0	0	21	1	1	0	5
Otu00717	Bacteria;Firmicutes;Clostridia;Clostridiales;Ruminococcaceae;unclassified_Ruminococcaceae	0	0	0	0	3	8	0	6	3	11	8	5	3	5	1	53	0	0	1	0	0	0	0	0	0	0	0	0	0	0	0	0	0	0	0	0	0	0	0	0	0	0
Otu00718	Bacteria;Bacteroidetes;Bacteroidia;Bacteroidales;Bacteroidaceae;Bacteroides	0	42	9	0	0	0	0	0	0	0	0	0	0	0	0	0	0	0	0	0	0	0	27	0	7	0	0	0	0	0	2	0	0	0	0	15	0	0	0	0	5	0
Otu00719	Bacteria;Firmicutes;Clostridia;Clostridiales;Lachnospiraceae;Blautia	0	0	0	0	2	1	0	0	0	3	0	0	0	1	0	0	0	0	0	0	1	88	0	0	0	0	0	0	0	3	0	0	0	3	1	0	0	0	2	1	0	0
Otu00720	Bacteria;Firmicutes;Clostridia;Clostridiales;Clostridiaceae 1;Clostridium sensu stricto	0	0	0	1	2	2	0	0	0	0	0	0	0	0	0	0	4	0	0	0	0	0	0	0	0	0	79	0	0	12	0	0	1	2	0	3	0	0	0	0	0	0
Otu00721	Bacteria;Firmicutes;Clostridia;Clostridiales;Lachnospiraceae;unclassified_Lachnospiraceae	7	1	0	0	2	2	17	19	4	2	1	0	1	0	0	3	0	4	6	2	7	0	0	0	1	0	1	0	0	2	1	0	4	8	3	1	0	1	0	2	3	0
Otu00722	Bacteria;Firmicutes;Clostridia;Clostridiales;Ruminococcaceae;Ruminococcus	0	0	12	1	4	1	0	0	7	0	0	0	49	0	0	0	2	22	2	0	0	0	0	0	0	0	0	0	0	0	3	0	0	0	0	0	0	2	0	0	0	0
Otu00723	Bacteria;Firmicutes;Negativicutes;Selenomonadales;Veillonellaceae;unclassified_Veillonellaceae	0	0	0	0	0	0	0	0	0	0	0	0	31	0	0	0	24	0	0	29	0	0	0	2	0	0	0	0	0	0	0	0	0	0	0	0	0	19	0	0	0	0
Otu00724	Bacteria;Firmicutes;Negativicutes;Selenomonadales;Veillonellaceae;Dialister	0	104	0	0	0	0	0	0	0	0	0	0	0	0	0	0	0	0	0	0	0	0	0	0	0	0	0	0	0	0	0	0	0	0	0	0	0	0	0	0	0	0
Otu00725	Bacteria;Firmicutes;Clostridia;Clostridiales;Ruminococcaceae;Faecalibacterium	13	4	1	0	0	0	9	3	0	0	0	0	0	0	0	0	0	0	0	2	0	0	1	0	0	0	0	2	0	0	0	0	3	2	50	0	0	0	0	0	13	1
Otu00726	Bacteria;Firmicutes;Clostridia;Clostridiales;Lachnospiraceae;unclassified_Lachnospiraceae	0	0	0	0	7	3	0	3	15	15	1	0	6	3	1	48	0	0	2	0	0	0	0	0	0	0	0	0	0	0	0	0	0	0	0	0	0	0	0	0	0	0
Otu00727	Bacteria;Firmicutes;Clostridia;Clostridiales;Ruminococcaceae;unclassified_Ruminococcaceae	0	0	0	0	18	0	0	0	0	0	0	0	0	19	0	55	0	0	0	0	0	0	3	0	0	0	0	0	0	0	0	0	0	0	0	0	0	9	0	0	0	0
Otu00728	Bacteria;Bacteroidetes;Bacteroidia;Bacteroidales;unclassified_Bacteroidales;	0	5	0	0	0	0	0	0	0	0	0	0	0	0	1	0	0	0	0	0	12	0	0	0	0	0	0	79	0	0	0	0	0	3	0	0	0	0	0	1	0	3
Otu00729	Bacteria;Firmicutes;Clostridia;Clostridiales;Lachnospiraceae;Ruminococcus2	0	8	2	1	4	0	1	6	8	4	1	0	4	2	4	3	6	8	0	3	0	0	0	0	0	0	0	0	0	0	0	0	2	19	0	0	4	0	0	0	11	2
Otu00730	Bacteria;Firmicutes;Clostridia;Clostridiales;Lachnospiraceae;unclassified_Lachnospiraceae	2	1	0	0	24	3	1	0	0	2	1	30	0	12	1	1	0	0	12	3	0	0	0	0	0	0	0	0	0	0	0	4	2	3	0	0	0	1	0	0	0	0
Otu00731	Bacteria;Firmicutes;Clostridia;Clostridiales;Ruminococcaceae;Faecalibacterium	0	0	11	0	0	0	0	0	0	0	0	0	0	0	2	0	0	0	0	0	0	15	1	1	5	0	4	13	0	0	0	0	3	1	0	2	0	41	4	0	0	0
Otu00732	Bacteria;Bacteroidetes;Bacteroidia;Bacteroidales;Bacteroidaceae;Bacteroides	10	0	0	0	0	23	1	5	0	0	0	0	0	0	0	1	0	0	48	1	2	0	0	1	0	0	0	0	0	0	0	7	0	2	0	0	1	0	0	0	0	0
Otu00733	Bacteria;Bacteroidetes;Bacteroidia;Bacteroidales;Rikenellaceae;Alistipes	0	0	1	1	1	0	0	20	3	0	6	26	0	3	1	19	0	0	0	0	0	0	0	2	3	0	0	0	2	0	0	0	1	13	0	0	0	0	0	0	0	0
Otu00734	Bacteria;Firmicutes;Clostridia;Clostridiales;Lachnospiraceae;unclassified_Lachnospiraceae	0	53	0	2	32	1	0	0	1	0	0	0	7	0	0	4	1	0	0	0	0	0	0	0	0	0	0	0	0	0	1	0	0	0	0	0	0	0	0	0	0	0
Otu00735	Bacteria;Firmicutes;Negativicutes;Selenomonadales;unclassified_Selenomonadales;	0	2	0	0	0	0	0	0	0	0	0	0	0	0	0	0	0	0	7	0	0	0	0	7	0	15	0	66	0	0	0	0	0	0	0	1	0	4	0	0	0	0
Otu00736	Bacteria;Proteobacteria;Betaproteobacteria;Burkholderiales;Sutterellaceae;Sutterella	0	0	0	4	17	0	0	0	33	0	0	0	1	13	6	15	2	2	0	0	0	9	0	0	0	0	0	0	0	0	0	0	0	0	0	0	0	0	0	0	0	0
Otu00737	Bacteria;Firmicutes;Clostridia;Clostridiales;Ruminococcaceae;unclassified_Ruminococcaceae	0	0	0	0	10	0	0	9	0	4	48	0	1	8	0	20	0	0	0	1	0	0	0	0	0	0	0	0	0	0	0	0	0	0	0	0	0	0	0	0	0	0
Otu00738	Bacteria;Firmicutes;Clostridia;Clostridiales;Ruminococcaceae;unclassified_Ruminococcaceae	4	3	0	0	4	7	0	6	2	2	0	0	1	1	5	6	0	0	0	1	0	0	0	0	0	0	0	0	6	3	2	0	3	31	12	0	0	0	0	0	0	2
Otu00739	Bacteria;Firmicutes;Clostridia;Clostridiales;Lachnospiraceae;Roseburia	0	0	2	0	0	0	20	1	11	0	0	0	4	0	1	0	0	1	0	2	0	0	0	0	0	0	0	0	2	0	0	0	32	2	23	0	0	0	0	0	0	0
Otu00740	Bacteria;Firmicutes;Clostridia;Clostridiales;Lachnospiraceae;unclassified_Lachnospiraceae	58	0	1	0	3	2	5	1	1	1	0	0	0	2	1	1	0	0	0	7	0	0	0	0	0	0	6	0	0	0	0	0	3	3	3	0	0	0	0	0	2	1
Otu00741	Bacteria;Firmicutes;Clostridia;Clostridiales;Lachnospiraceae;unclassified_Lachnospiraceae	0	0	0	0	0	2	0	0	21	0	0	0	0	0	0	23	0	40	0	10	0	0	0	0	0	0	0	0	0	0	1	0	0	4	0	0	0	0	0	0	0	0
Otu00742	Bacteria;Firmicutes;Clostridia;Clostridiales;Ruminococcaceae;unclassified_Ruminococcaceae	0	0	0	2	0	0	0	0	0	23	0	0	0	0	0	0	0	0	0	0	0	0	0	0	0	0	0	0	0	0	0	0	0	76	0	0	0	0	0	0	0	0
Otu00743	Bacteria;Firmicutes;Clostridia;Clostridiales;Lachnospiraceae;unclassified_Lachnospiraceae	0	2	0	3	1	3	0	2	4	1	1	0	0	1	13	0	1	0	3	3	43	7	0	0	0	0	0	0	1	0	0	0	2	3	3	0	1	1	1	0	0	0
Otu00744	Bacteria;Firmicutes;Clostridia;Clostridiales;Ruminococcaceae;unclassified_Ruminococcaceae	0	2	1	1	6	16	0	0	2	1	3	1	5	2	0	1	0	0	46	8	0	0	0	0	1	0	0	0	0	0	0	0	0	3	0	0	0	1	0	0	0	0
Otu00745	Bacteria;Firmicutes;Clostridia;Clostridiales;Lachnospiraceae;unclassified_Lachnospiraceae	0	0	0	0	8	0	0	1	0	6	0	0	0	79	0	5	0	0	0	0	0	0	0	0	0	0	0	0	0	0	1	0	0	0	0	0	0	0	0	0	0	0
Otu00746	Bacteria;Firmicutes;Clostridia;Clostridiales;Lachnospiraceae;unclassified_Lachnospiraceae	4	0	3	2	0	3	20	6	21	0	0	0	3	0	2	0	0	0	3	1	1	0	0	0	1	0	1	0	1	0	2	0	8	1	10	0	1	2	3	0	0	1
Otu00747	Bacteria;Bacteroidetes;Bacteroidia;Bacteroidales;Porphyromonadaceae;Butyricimonas	0	0	0	0	5	0	0	0	0	0	1	4	0	0	0	0	0	0	0	0	72	0	0	0	0	0	0	17	0	0	0	0	0	1	0	0	0	0	0	0	0	0
Otu00748	Bacteria;Firmicutes;Clostridia;Clostridiales;Lachnospiraceae;unclassified_Lachnospiraceae	0	15	0	1	0	23	0	2	1	0	0	0	0	0	0	0	0	1	0	5	0	0	0	0	0	0	0	0	0	0	2	0	16	0	30	0	2	0	0	0	2	0
Otu00749	Bacteria;Firmicutes;Clostridia;Clostridiales;Lachnospiraceae;unclassified_Lachnospiraceae	33	0	5	1	0	7	10	1	1	0	2	0	0	2	0	14	0	0	0	5	0	0	2	0	1	0	1	1	1	0	1	0	0	1	1	0	0	1	0	2	7	0
Otu00750	Bacteria;Bacteroidetes;Bacteroidia;Bacteroidales;Prevotellaceae;Prevotella	0	0	0	11	3	0	0	0	3	6	0	0	6	10	6	1	8	7	0	0	0	0	0	0	11	0	0	0	0	0	10	0	0	0	0	0	0	17	0	0	0	0
Otu00751	Bacteria;Bacteroidetes;Bacteroidia;Bacteroidales;Bacteroidaceae;Bacteroides	0	0	0	0	0	0	0	0	18	0	0	0	0	0	9	0	0	9	0	0	40	0	0	8	0	0	5	0	0	7	0	0	0	2	0	0	0	0	0	1	0	0
Otu00752	Bacteria;unclassified_Bacteria;;;;	0	0	4	0	0	0	0	0	0	0	0	0	0	0	4	0	5	0	0	0	0	0	0	5	3	0	19	0	0	0	0	0	0	0	0	28	0	17	14	0	0	0
Otu00753	Bacteria;Firmicutes;Negativicutes;Selenomonadales;Veillonellaceae;Megamonas	0	1	2	0	0	0	0	0	0	0	0	0	0	0	1	1	0	0	1	0	0	5	0	1	1	1	51	0	0	0	0	0	1	6	0	0	0	4	4	19	0	0
Otu00754	Bacteria;Firmicutes;Clostridia;Clostridiales;unclassified_Clostridiales;	0	0	0	0	67	0	0	0	0	4	3	0	1	2	0	20	0	0	0	0	0	0	0	0	0	0	0	0	0	0	0	0	0	0	0	0	0	2	0	0	0	0
Otu00755	Bacteria;Bacteroidetes;Bacteroidia;Bacteroidales;Bacteroidaceae;Bacteroides	0	0	0	0	0	0	0	0	0	0	0	0	0	0	0	0	0	0	0	0	0	0	0	0	0	0	0	0	0	0	0	0	0	0	0	0	0	0	0	99	0	0
Otu00756	Bacteria;Firmicutes;Clostridia;Clostridiales;Lachnospiraceae;Clostridium XlVa	0	0	0	0	0	1	0	1	0	1	2	81	0	0	0	0	0	0	2	0	0	0	0	0	0	0	0	0	0	0	0	0	0	8	0	0	0	0	0	0	0	2
Otu00757	Bacteria;Firmicutes;Clostridia;Clostridiales;unclassified_Clostridiales;	0	0	0	0	0	0	0	0	0	0	0	0	0	0	0	98	0	0	0	0	0	0	0	0	0	0	0	0	0	0	0	0	0	0	0	0	0	0	0	0	0	0
Otu00758	Bacteria;Actinobacteria;Actinobacteria;Bifidobacteriales;Bifidobacteriaceae;Bifidobacterium	2	1	0	0	0	0	0	0	0	0	0	27	0	0	0	0	0	0	64	0	0	0	0	0	0	0	0	0	1	0	0	0	0	2	0	0	0	0	0	0	1	0
Otu00759	Bacteria;Firmicutes;Clostridia;Clostridiales;Lachnospiraceae;Fusicatenibacter	15	0	2	1	2	3	1	15	1	1	0	0	0	0	3	2	0	0	15	0	8	0	3	1	0	0	0	0	0	1	0	0	1	16	5	0	0	0	1	0	1	0
Otu00760	Bacteria;Firmicutes;Clostridia;Clostridiales;Lachnospiraceae;Lachnospiracea_incertae_sedis	37	0	0	0	0	7	22	0	0	0	0	0	0	0	0	1	0	0	0	0	0	0	0	1	0	0	3	0	1	2	0	15	1	0	0	0	0	0	0	0	8	0
Otu00761	Bacteria;Firmicutes;Clostridia;Clostridiales;Lachnospiraceae;unclassified_Lachnospiraceae	0	0	1	0	0	0	0	0	0	0	0	0	0	0	0	0	0	0	0	0	0	97	0	0	0	0	0	0	0	0	0	0	0	0	0	0	0	0	0	0	0	0
Otu00762	Bacteria;Proteobacteria;Betaproteobacteria;Burkholderiales;Comamonadaceae;Comamonas	0	0	0	0	3	74	0	2	0	0	0	0	0	0	0	18	0	0	0	0	0	0	0	0	1	0	0	0	0	0	0	0	0	0	0	0	0	0	0	0	0	0
Otu00763	Bacteria;Fusobacteria;Fusobacteriia;Fusobacteriales;Fusobacteriaceae;unclassified_Fusobacteriaceae	0	0	0	0	1	0	0	0	1	0	0	0	1	0	0	0	0	0	0	0	0	0	0	56	0	0	25	0	0	0	0	0	0	0	0	0	0	0	0	14	0	0
Otu00764	Bacteria;Firmicutes;Clostridia;Clostridiales;Lachnospiraceae;Anaerostipes	1	1	0	1	0	1	11	4	1	0	1	2	0	0	1	2	0	0	5	0	1	0	1	0	0	0	0	0	0	50	0	6	0	1	1	0	1	0	0	1	2	2
Otu00765	Bacteria;Bacteroidetes;Bacteroidia;Bacteroidales;Bacteroidaceae;Bacteroides	0	0	0	0	0	0	0	3	0	0	69	14	0	0	0	0	0	0	0	0	0	0	0	0	0	0	0	0	0	0	2	0	0	3	0	0	6	0	0	0	0	0
Otu00766	Bacteria;Firmicutes;Clostridia;Clostridiales;Lachnospiraceae;Ruminococcus2	8	0	0	1	0	3	0	1	9	1	2	0	1	6	0	10	0	0	3	1	31	0	0	0	0	0	2	0	11	1	0	0	0	1	0	1	0	2	1	0	1	0
Otu00767	Bacteria;Firmicutes;Clostridia;Clostridiales;unclassified_Clostridiales;	0	0	0	0	33	0	0	9	0	43	3	0	0	3	6	0	0	0	0	0	0	0	0	0	0	0	0	0	0	0	0	0	0	0	0	0	0	0	0	0	0	0
Otu00768	Bacteria;Bacteroidetes;Bacteroidia;Bacteroidales;Bacteroidaceae;Bacteroides	0	0	0	0	0	0	0	0	0	0	0	0	0	0	0	0	0	0	0	0	0	0	0	0	0	37	0	0	0	0	0	0	0	0	0	0	0	0	0	0	60	0
Otu00769	Bacteria;Bacteroidetes;Bacteroidia;Bacteroidales;Bacteroidaceae;Bacteroides	0	0	0	0	0	0	0	0	0	0	0	0	0	0	0	0	0	0	0	0	0	92	0	0	0	0	0	0	0	5	0	0	0	0	0	0	0	0	0	0	0	0
Otu00770	Bacteria;Firmicutes;Clostridia;Clostridiales;Lachnospiraceae;unclassified_Lachnospiraceae	0	0	3	4	0	0	0	0	16	3	0	0	18	1	17	6	0	1	0	0	0	0	2	0	2	0	6	5	0	0	4	0	0	0	0	0	0	1	0	1	0	7
Otu00771	Bacteria;Verrucomicrobia;Verrucomicrobiae;Verrucomicrobiales;Verrucomicrobiaceae;Akkermansia	0	1	0	0	0	1	0	0	0	0	91	1	0	0	0	0	0	0	0	0	0	0	0	0	0	0	0	0	0	0	0	0	0	0	0	0	1	1	0	0	0	0
Otu00772	Bacteria;Firmicutes;Clostridia;Clostridiales;Lachnospiraceae;Blautia	12	3	3	0	2	8	0	18	3	0	0	0	0	3	3	1	0	2	4	2	20	0	0	0	0	0	0	0	0	0	0	0	1	10	1	0	0	0	0	0	0	0
Otu00773	Bacteria;Firmicutes;Clostridia;Clostridiales;Lachnospiraceae;Clostridium XlVa	2	0	1	8	1	0	0	3	2	11	0	0	2	3	19	12	4	0	0	4	3	0	0	0	1	0	0	0	1	0	0	0	0	2	2	0	0	2	0	0	1	12
Otu00774	Bacteria;Bacteroidetes;Bacteroidia;Bacteroidales;Bacteroidaceae;Bacteroides	0	0	0	0	0	0	0	0	0	0	0	0	0	0	1	0	0	0	0	11	0	0	0	0	1	13	0	0	55	0	0	0	0	0	0	0	1	0	0	0	14	0
Otu00775	Bacteria;Firmicutes;Clostridia;Clostridiales;Lachnospiraceae;unclassified_Lachnospiraceae	6	2	2	2	3	3	20	4	5	4	0	0	0	2	9	2	1	1	0	3	0	0	1	0	0	0	6	0	2	1	0	0	0	0	9	0	1	1	0	2	3	1
Otu00776	Bacteria;Bacteroidetes;Bacteroidia;Bacteroidales;Bacteroidaceae;Bacteroides	0	0	0	0	0	0	0	0	0	0	0	0	0	0	0	0	0	0	0	0	0	0	0	0	0	83	0	0	0	0	0	0	0	0	0	0	0	0	0	0	13	0
Otu00777	Bacteria;Firmicutes;unclassified_Firmicutes;;;	0	0	0	0	8	0	0	0	2	5	27	0	2	3	1	20	0	1	17	9	0	0	0	0	0	0	0	0	0	0	0	0	0	0	0	0	0	0	0	0	0	0
Otu00778	Bacteria;Firmicutes;Clostridia;Clostridiales;Lachnospiraceae;Blautia	0	1	2	1	11	0	0	3	5	20	8	0	5	6	10	7	0	2	0	10	0	0	0	0	0	0	0	0	0	0	0	0	0	0	0	0	0	0	4	0	0	0
Otu00779	Bacteria;Bacteroidetes;Bacteroidia;Bacteroidales;Porphyromonadaceae;Parabacteroides	7	0	0	0	0	4	4	6	1	0	0	12	0	0	0	2	0	0	23	0	6	0	0	0	0	3	0	4	1	4	0	7	0	5	2	0	2	0	0	0	2	0
Otu00780	Bacteria;Firmicutes;unclassified_Firmicutes;;;	44	1	0	0	2	1	0	1	1	0	0	0	0	0	0	1	1	0	11	0	22	0	0	0	0	0	3	0	0	0	0	1	0	4	2	0	0	0	0	0	0	0
Otu00781	Bacteria;Firmicutes;Clostridia;Clostridiales;Lachnospiraceae;unclassified_Lachnospiraceae	0	0	0	0	0	0	19	1	1	2	0	0	1	0	2	2	6	0	0	1	3	0	2	0	0	0	2	0	2	5	0	0	1	1	3	0	7	0	0	3	30	1
Otu00782	Bacteria;Firmicutes;Negativicutes;Selenomonadales;Acidaminococcaceae;Phascolarctobacterium	0	0	20	0	0	0	0	0	0	0	0	0	0	0	6	1	1	0	0	0	0	46	0	0	0	0	0	0	0	0	0	0	1	0	0	0	0	0	20	0	0	0
Otu00783	Bacteria;Firmicutes;Clostridia;Clostridiales;Lachnospiraceae;unclassified_Lachnospiraceae	37	4	1	0	3	10	5	5	0	2	0	0	0	4	7	2	0	1	1	0	0	0	0	1	0	0	1	1	0	0	0	0	1	1	6	0	1	1	0	0	0	0
Otu00784	Bacteria;Firmicutes;Clostridia;Clostridiales;Lachnospiraceae;unclassified_Lachnospiraceae	0	0	0	0	0	0	0	5	0	0	0	0	0	0	0	0	0	0	0	0	0	0	0	0	0	0	0	0	0	90	0	0	0	0	0	0	0	0	0	0	0	0
Otu00785	Bacteria;Firmicutes;Clostridia;Clostridiales;Lachnospiraceae;unclassified_Lachnospiraceae	0	1	0	2	8	5	0	2	16	15	10	0	1	2	8	1	2	0	0	5	5	0	0	0	1	0	0	0	0	0	2	0	1	5	0	0	0	0	2	0	0	0
Otu00786	Bacteria;Firmicutes;Bacilli;Lactobacillales;Streptococcaceae;Streptococcus	0	1	0	0	0	6	0	0	0	0	0	0	0	0	0	0	0	5	1	0	0	0	0	1	0	0	1	0	0	0	0	2	68	0	0	9	0	0	0	0	0	0
Otu00787	Bacteria;Bacteroidetes;Bacteroidia;Bacteroidales;Rikenellaceae;Alistipes	0	0	0	1	0	0	0	0	0	0	2	0	0	0	0	27	0	0	0	0	0	0	0	0	0	0	0	0	0	0	0	0	0	64	0	0	0	0	0	0	0	0
Otu00788	Bacteria;Proteobacteria;Deltaproteobacteria;unclassified_Deltaproteobacteria;;	0	0	0	0	0	0	0	0	0	0	0	0	0	0	87	7	0	0	0	0	0	0	0	0	0	0	0	0	0	0	0	0	0	0	0	0	0	0	0	0	0	0
Otu00789	Bacteria;Proteobacteria;Gammaproteobacteria;Aeromonadales;Succinivibrionaceae;Succinivibrio	0	0	0	0	0	0	0	0	0	0	0	0	0	69	0	0	25	0	0	0	0	0	0	0	0	0	0	0	0	0	0	0	0	0	0	0	0	0	0	0	0	0
Otu00790	Bacteria;Firmicutes;Clostridia;Clostridiales;unclassified_Clostridiales;	0	0	0	0	3	19	0	2	0	0	54	2	0	0	0	0	0	0	11	2	0	0	0	0	0	0	0	0	0	0	0	0	0	0	0	0	0	0	0	0	0	0
Otu00791	Bacteria;Firmicutes;Clostridia;Clostridiales;Lachnospiraceae;unclassified_Lachnospiraceae	6	7	0	1	8	2	1	0	5	8	0	0	0	0	12	7	0	1	7	7	17	0	0	0	0	0	2	0	0	0	0	0	0	0	2	0	0	0	0	0	0	0
Otu00792	Bacteria;Firmicutes;Clostridia;Clostridiales;Lachnospiraceae;unclassified_Lachnospiraceae	0	0	3	14	0	0	0	1	0	7	0	0	1	4	30	18	0	0	0	2	0	0	0	0	2	0	1	0	0	0	1	0	0	0	4	0	0	2	0	0	1	2
Otu00793	Bacteria;Proteobacteria;unclassified_Proteobacteria;;;	0	0	0	0	1	0	0	0	0	0	0	0	0	0	0	1	6	0	0	0	0	85	0	0	0	0	0	0	0	0	0	0	0	0	0	0	0	0	0	0	0	0
Otu00794	Bacteria;Firmicutes;Negativicutes;Selenomonadales;Veillonellaceae;Megamonas	0	1	1	0	0	0	0	0	0	0	0	0	0	0	0	0	1	2	1	0	0	0	0	8	4	1	9	1	0	0	0	0	45	0	0	18	0	1	0	0	0	0
Otu00795	Bacteria;Bacteroidetes;Bacteroidia;Bacteroidales;Bacteroidaceae;Bacteroides	0	0	0	0	2	0	0	0	0	0	0	0	3	1	10	7	0	0	0	0	0	0	0	0	0	0	0	0	0	0	2	0	0	11	0	0	57	0	0	0	0	0
Otu00796	Bacteria;Actinobacteria;Actinobacteria;Bifidobacteriales;Bifidobacteriaceae;Bifidobacterium	7	0	0	0	0	1	0	0	0	0	0	3	0	0	0	0	0	1	34	0	1	0	0	4	0	0	0	0	0	0	0	0	5	0	0	0	0	0	26	10	0	0
Otu00797	Bacteria;Firmicutes;Clostridia;Clostridiales;Lachnospiraceae;unclassified_Lachnospiraceae	0	5	0	3	27	0	0	0	5	17	2	0	0	7	6	7	4	1	0	3	0	0	1	0	0	0	0	0	1	0	2	0	0	0	0	0	0	1	0	0	0	0
Otu00798	Bacteria;Firmicutes;Clostridia;Clostridiales;Ruminococcaceae;unclassified_Ruminococcaceae	0	0	0	2	1	2	0	3	9	1	38	0	6	0	1	4	3	0	0	0	0	0	0	0	0	0	0	0	0	0	0	0	0	17	0	0	0	5	0	0	0	0
Otu00799	Bacteria;Firmicutes;Clostridia;Clostridiales;unclassified_Clostridiales;	0	0	0	0	2	0	0	52	0	6	1	0	0	16	0	15	0	0	0	0	0	0	0	0	0	0	0	0	0	0	0	0	0	0	0	0	0	0	0	0	0	0
Otu00800	Bacteria;Firmicutes;Negativicutes;Selenomonadales;Veillonellaceae;Mitsuokella	0	0	0	0	0	0	0	0	0	0	0	0	19	2	0	0	25	0	0	0	0	0	46	0	0	0	0	0	0	0	0	0	0	0	0	0	0	0	0	0	0	0
Otu00801	Bacteria;Bacteroidetes;Bacteroidia;Bacteroidales;Prevotellaceae;Prevotella	0	0	0	8	5	0	0	0	0	13	0	0	13	3	48	0	2	0	0	0	0	0	0	0	0	0	0	0	0	0	0	0	0	0	0	0	0	0	0	0	0	0
Otu00802	Bacteria;Firmicutes;Clostridia;Clostridiales;Lachnospiraceae;unclassified_Lachnospiraceae	0	0	0	0	1	0	0	0	0	87	0	0	0	2	0	0	0	0	0	0	0	0	0	0	0	0	0	0	0	0	1	0	0	0	0	0	0	1	0	0	0	0
Otu00803	Bacteria;Fusobacteria;Fusobacteriia;Fusobacteriales;Fusobacteriaceae;Fusobacterium	0	0	0	0	8	0	0	0	5	0	0	0	4	0	0	0	0	0	0	0	0	9	0	3	0	8	13	0	0	2	0	33	0	0	0	0	0	0	0	6	0	0
Otu00804	Bacteria;Firmicutes;Clostridia;Clostridiales;Ruminococcaceae;unclassified_Ruminococcaceae	0	2	0	0	11	3	0	2	2	10	7	0	7	12	2	17	0	2	7	2	0	0	0	0	0	0	0	0	0	0	0	0	0	4	0	0	0	0	0	0	0	1
Otu00805	Bacteria;Firmicutes;Clostridia;Clostridiales;Ruminococcaceae;Faecalibacterium	2	0	18	0	3	1	3	3	0	1	0	0	0	0	0	2	0	0	0	0	3	2	0	0	0	0	0	2	1	0	0	0	0	0	30	0	1	0	0	0	0	19
Otu00806	Bacteria;Firmicutes;Clostridia;Clostridiales;Lachnospiraceae;Roseburia	2	1	2	1	1	4	10	4	3	0	0	0	10	1	1	4	0	1	0	7	0	0	1	0	0	0	0	0	1	1	2	0	10	3	15	0	3	0	0	0	0	3
Otu00807	Bacteria;Firmicutes;Clostridia;Clostridiales;Lachnospiraceae;unclassified_Lachnospiraceae	9	0	0	3	8	3	0	9	4	16	0	0	0	7	2	5	0	0	0	1	13	0	0	0	0	0	0	0	0	1	0	0	0	1	5	0	3	0	0	0	0	1
Otu00808	Bacteria;Firmicutes;Clostridia;Clostridiales;Lachnospiraceae;Blautia	16	8	1	0	4	2	0	8	4	2	0	0	0	2	3	2	0	1	0	7	13	0	1	2	1	0	1	0	0	0	1	0	1	5	5	0	1	0	0	0	0	0
Otu00809	Bacteria;Bacteroidetes;Bacteroidia;Bacteroidales;Rikenellaceae;Alistipes	0	0	0	0	0	0	0	0	0	0	0	84	0	0	0	0	0	0	7	0	0	0	0	0	0	0	0	0	0	0	0	0	0	0	0	0	0	0	0	0	0	0
Otu00810	Bacteria;Firmicutes;Negativicutes;Selenomonadales;Veillonellaceae;Mitsuokella	0	0	0	0	0	0	0	0	0	0	0	0	0	0	0	0	0	0	0	0	0	0	91	0	0	0	0	0	0	0	0	0	0	0	0	0	0	0	0	0	0	0
Otu00811	Bacteria;Bacteroidetes;Bacteroidia;Bacteroidales;Prevotellaceae;Prevotella	0	0	0	5	2	0	0	0	4	1	0	0	4	11	0	6	14	3	0	0	0	0	0	0	20	0	0	0	0	0	21	0	0	0	0	0	0	0	0	0	0	0
Otu00812	Bacteria;Actinobacteria;Actinobacteria;Coriobacteriales;Coriobacteriaceae;unclassified_Coriobacteriaceae	0	0	0	0	3	0	0	0	0	17	69	0	0	2	0	0	0	0	0	0	0	0	0	0	0	0	0	0	0	0	0	0	0	0	0	0	0	0	0	0	0	0
Otu00813	Bacteria;Firmicutes;Clostridia;Clostridiales;Lachnospiraceae;unclassified_Lachnospiraceae	0	0	0	0	0	0	1	0	13	0	0	0	0	0	0	0	0	1	0	0	0	0	0	0	0	0	0	0	0	0	0	0	76	0	0	0	0	0	0	0	0	0
Otu00814	Bacteria;Bacteroidetes;Bacteroidia;Bacteroidales;Prevotellaceae;unclassified_Prevotellaceae	0	0	0	1	0	0	0	0	0	0	0	0	19	4	29	3	35	0	0	0	0	0	0	0	0	0	0	0	0	0	0	0	0	0	0	0	0	0	0	0	0	0
Otu00815	Bacteria;Bacteroidetes;Bacteroidia;Bacteroidales;Bacteroidaceae;Bacteroides	0	7	0	0	0	0	0	0	0	0	0	0	0	0	0	0	0	0	0	2	0	10	0	1	0	2	0	0	5	2	0	0	0	0	23	0	7	0	0	1	31	0
Otu00816	Bacteria;Firmicutes;Negativicutes;Selenomonadales;Veillonellaceae;Megamonas	0	0	0	0	0	0	0	0	0	0	0	0	0	0	1	0	0	0	0	0	0	0	17	9	18	0	0	0	0	0	5	0	0	16	0	5	0	13	0	7	0	0
Otu00817	Bacteria;Firmicutes;Clostridia;Clostridiales;Ruminococcaceae;unclassified_Ruminococcaceae	0	0	5	0	0	0	0	1	2	0	0	0	12	0	0	0	1	0	0	23	0	0	0	2	0	0	0	0	1	0	3	0	0	0	22	0	0	1	1	0	0	16
Otu00818	Bacteria;Firmicutes;unclassified_Firmicutes;;;	0	2	0	0	0	1	0	2	13	0	0	0	0	0	0	0	0	17	10	0	0	0	0	0	0	0	0	0	0	6	0	0	35	0	3	0	0	0	0	0	0	1
Otu00819	Bacteria;Actinobacteria;Actinobacteria;Bifidobacteriales;Bifidobacteriaceae;unclassified_Bifidobacteriaceae	29	0	1	0	0	26	0	2	0	0	0	9	0	0	0	9	0	0	8	1	0	0	0	0	0	0	0	0	0	0	0	0	0	0	2	0	0	0	0	0	3	0
Otu00820	Bacteria;Firmicutes;Clostridia;Clostridiales;Lachnospiraceae;Fusicatenibacter	8	0	0	2	1	2	1	33	2	1	2	0	0	1	1	3	0	0	4	2	0	0	1	1	0	0	0	0	2	3	1	0	5	5	7	0	0	0	0	0	1	1
Otu00821	Bacteria;Firmicutes;Clostridia;Clostridiales;Ruminococcaceae;Faecalibacterium	0	1	11	1	2	0	0	0	2	1	0	0	9	1	5	1	5	12	0	0	1	0	3	0	0	0	0	2	0	0	1	0	0	0	0	1	0	11	0	0	0	20
Otu00822	Bacteria;Lentisphaerae;Lentisphaeria;Victivallales;Victivallaceae;Victivallis	0	0	0	0	0	0	0	0	0	0	0	0	0	0	0	0	0	0	0	0	0	0	0	0	0	0	0	0	0	0	0	0	0	90	0	0	0	0	0	0	0	0
Otu00823	Bacteria;Bacteroidetes;Bacteroidia;Bacteroidales;Prevotellaceae;Prevotella	0	0	0	4	0	0	0	0	0	1	0	0	11	4	5	1	0	0	0	0	0	0	0	0	0	0	1	0	0	0	7	0	0	0	0	0	0	56	0	0	0	0
Otu00824	Bacteria;Firmicutes;Clostridia;Clostridiales;Lachnospiraceae;unclassified_Lachnospiraceae	0	0	1	0	0	0	0	12	0	0	0	0	0	0	0	0	0	0	0	0	0	0	0	0	0	0	0	0	0	77	0	0	0	0	0	0	0	0	0	0	0	0
Otu00825	Bacteria;Firmicutes;Clostridia;Clostridiales;Lachnospiraceae;Fusicatenibacter	15	0	0	0	1	0	0	11	0	0	1	0	0	1	0	2	0	1	5	1	6	0	0	0	0	0	0	0	6	0	0	0	1	24	14	0	0	0	0	0	0	0
Otu00826	Bacteria;Actinobacteria;Actinobacteria;Bifidobacteriales;Bifidobacteriaceae;Bifidobacterium	1	0	0	0	0	1	0	0	0	0	1	56	0	0	0	0	0	0	29	0	0	0	0	0	0	0	0	0	1	0	0	0	0	0	0	0	0	0	0	0	0	0
Otu00827	Bacteria;Firmicutes;Clostridia;Clostridiales;Ruminococcaceae;Ruminococcus	0	3	3	4	1	0	0	10	0	1	0	0	4	0	5	0	4	0	0	21	0	0	0	0	0	0	0	0	10	0	0	0	0	1	14	0	0	0	4	0	0	4
Otu00828	Bacteria;Firmicutes;Clostridia;Clostridiales;Lachnospiraceae;Clostridium XlVa	0	1	0	1	1	1	17	15	1	11	0	0	1	1	1	1	0	0	0	1	0	0	0	0	1	2	0	0	0	6	2	12	0	2	6	0	0	0	0	0	5	0
Otu00829	Bacteria;Firmicutes;Clostridia;Clostridiales;unclassified_Clostridiales;	0	0	0	0	0	23	0	29	13	0	0	0	0	0	12	0	0	0	4	8	0	0	0	0	0	0	0	0	0	0	0	0	0	0	0	0	0	0	0	0	0	0
Otu00830	Bacteria;unclassified_Bacteria;;;;	0	16	7	0	9	0	0	0	0	8	0	0	3	5	4	6	0	0	0	0	0	0	2	4	3	0	8	3	0	0	9	0	0	0	0	0	0	0	0	0	0	2
Otu00831	Bacteria;Firmicutes;Clostridia;Clostridiales;Lachnospiraceae;Roseburia	0	0	5	0	0	0	1	15	2	1	0	0	9	0	0	0	2	18	0	3	0	0	0	0	0	0	0	0	0	0	0	0	2	4	5	0	0	0	0	0	16	5
Otu00832	Bacteria;Bacteroidetes;Bacteroidia;Bacteroidales;Bacteroidaceae;Bacteroides	0	0	0	0	0	0	0	0	0	0	0	0	0	0	0	0	0	0	0	10	13	0	1	0	0	3	1	2	55	0	0	0	0	3	0	0	0	0	0	0	0	0
Otu00833	Bacteria;Bacteroidetes;Bacteroidia;Bacteroidales;Bacteroidaceae;Bacteroides	0	0	0	0	0	0	0	0	0	0	0	0	0	0	0	0	0	0	0	31	0	0	0	0	0	2	0	0	31	0	0	0	0	0	0	0	3	0	0	0	21	0
Otu00834	Bacteria;Firmicutes;Clostridia;Clostridiales;Lachnospiraceae;unclassified_Lachnospiraceae	11	1	0	1	0	2	27	6	6	6	0	0	0	2	1	0	0	2	3	0	1	0	0	1	0	0	3	0	3	1	0	0	0	0	6	0	0	0	0	0	3	2
Otu00835	Bacteria;Bacteroidetes;Bacteroidia;Bacteroidales;unclassified_Bacteroidales;	0	0	0	0	0	0	0	0	0	0	0	0	0	0	0	0	0	0	0	0	0	0	0	0	0	0	0	0	0	0	0	0	0	0	0	0	88	0	0	0	0	0
Otu00836	Bacteria;Firmicutes;Negativicutes;Selenomonadales;Veillonellaceae;Mitsuokella	0	0	0	0	0	0	0	0	0	0	0	0	12	0	0	0	13	0	0	0	0	0	61	0	0	0	0	0	0	0	0	0	0	0	0	0	0	2	0	0	0	0
Otu00837	Bacteria;Firmicutes;Clostridia;Clostridiales;unclassified_Clostridiales;	35	0	0	0	2	23	0	6	2	0	0	0	1	0	3	0	0	0	0	0	0	0	1	1	0	0	0	0	0	0	0	0	1	1	11	0	1	0	0	0	0	0
Otu00838	Bacteria;Firmicutes;Clostridia;Clostridiales;Ruminococcaceae;unclassified_Ruminococcaceae	7	0	7	1	4	2	0	0	5	0	0	0	1	9	4	5	2	3	0	3	17	0	0	1	2	0	0	3	2	0	0	0	1	2	2	0	1	1	0	0	0	2
Otu00839	Bacteria;Firmicutes;Clostridia;Clostridiales;Ruminococcaceae;unclassified_Ruminococcaceae	0	0	0	0	0	0	0	0	0	0	86	0	0	0	0	0	0	0	0	0	0	0	0	0	0	0	0	0	0	0	0	0	0	1	0	0	0	0	0	0	0	0
Otu00840	Bacteria;Proteobacteria;Betaproteobacteria;Burkholderiales;Sutterellaceae;Parasutterella	0	0	0	0	0	0	0	6	0	0	0	17	0	0	0	0	0	0	16	1	3	0	0	0	0	0	0	0	26	12	0	0	0	0	5	1	0	0	0	0	0	0
Otu00841	Bacteria;Firmicutes;Clostridia;Clostridiales;Ruminococcaceae;Faecalibacterium	0	2	6	0	0	0	0	1	0	2	0	0	7	0	0	0	0	0	0	16	0	0	0	0	1	0	0	0	1	0	0	0	0	0	34	0	1	0	0	0	0	16
Otu00842	Bacteria;Firmicutes;Clostridia;Clostridiales;Lachnospiraceae;Blautia	2	2	1	0	3	0	0	1	0	0	0	4	0	0	9	2	5	1	4	0	4	0	0	0	1	3	19	3	0	0	0	1	2	1	3	4	0	10	0	1	0	1
Otu00843	Bacteria;Bacteroidetes;Bacteroidia;Bacteroidales;Prevotellaceae;Prevotella	0	0	0	0	0	0	0	0	23	22	0	0	8	2	0	3	26	0	0	0	0	0	0	0	0	0	0	0	0	0	3	0	0	0	0	0	0	0	0	0	0	0
Otu00844	Bacteria;Firmicutes;Clostridia;Clostridiales;Ruminococcaceae;unclassified_Ruminococcaceae	0	0	0	0	0	20	0	0	1	1	5	0	0	0	0	0	0	0	57	3	0	0	0	0	0	0	0	0	0	0	0	0	0	0	0	0	0	0	0	0	0	0
Otu00845	Bacteria;unclassified_Bacteria;;;;	0	0	0	0	0	0	0	0	0	0	0	0	0	0	0	0	0	0	0	0	0	87	0	0	0	0	0	0	0	0	0	0	0	0	0	0	0	0	0	0	0	0
Otu00846	Bacteria;Firmicutes;Negativicutes;Selenomonadales;Veillonellaceae;Megamonas	0	4	3	0	0	0	0	0	0	0	0	0	0	0	1	0	1	0	0	0	0	10	2	10	3	0	4	5	0	0	3	0	1	0	0	2	0	16	22	0	0	0
Otu00847	Bacteria;Firmicutes;Clostridia;Clostridiales;Lachnospiraceae;Roseburia	0	0	5	1	2	0	0	19	10	1	0	0	6	0	2	1	2	11	1	9	0	0	0	0	0	0	0	0	3	1	0	0	1	8	1	0	1	0	0	0	1	0
Otu00848	Bacteria;Firmicutes;Clostridia;Clostridiales;Ruminococcaceae;Oscillibacter	0	10	0	0	2	0	0	9	4	4	0	0	2	6	1	6	1	0	5	1	11	0	2	1	4	0	0	0	2	0	2	0	0	0	7	0	2	0	0	0	0	4
Otu00849	Bacteria;unclassified_Bacteria;;;;	0	0	0	0	0	0	0	0	0	0	0	0	0	0	0	0	0	0	1	11	48	0	0	0	0	2	0	0	23	0	0	0	0	1	0	0	0	0	0	0	0	0
Otu00850	Bacteria;Bacteroidetes;Bacteroidia;Bacteroidales;Bacteroidaceae;Bacteroides	0	1	0	0	0	0	0	0	0	0	0	0	0	0	0	0	0	0	0	33	0	0	4	0	0	0	0	0	16	0	0	0	0	0	8	0	3	0	0	0	21	0
Otu00851	Bacteria;Firmicutes;Clostridia;Clostridiales;Lachnospiraceae;unclassified_Lachnospiraceae	21	0	2	0	1	1	0	14	6	17	0	0	0	0	3	0	0	3	1	2	5	0	0	1	0	0	2	0	0	0	1	0	3	2	1	0	0	0	0	0	0	0
Otu00852	Bacteria;unclassified_Bacteria;;;;	0	12	0	3	0	0	0	0	1	0	0	0	1	0	0	0	0	53	0	0	0	0	0	0	0	0	1	1	0	0	0	0	0	0	0	10	0	2	0	0	0	2
Otu00853	Bacteria;Firmicutes;Clostridia;Clostridiales;unclassified_Clostridiales;	0	0	0	0	22	0	0	0	0	0	14	0	0	8	0	42	0	0	0	0	0	0	0	0	0	0	0	0	0	0	0	0	0	0	0	0	0	0	0	0	0	0
Otu00854	Bacteria;Bacteroidetes;Bacteroidia;Bacteroidales;Bacteroidaceae;Bacteroides	0	0	0	0	0	0	0	0	0	0	0	0	0	0	0	0	0	0	0	0	0	0	0	0	0	63	0	0	0	0	0	0	0	0	0	0	0	0	0	0	23	0
Otu00855	Bacteria;Firmicutes;Clostridia;Clostridiales;Lachnospiraceae;Roseburia	0	0	0	1	1	14	0	14	6	3	0	0	1	0	3	8	0	0	2	21	0	0	0	0	0	0	1	0	2	0	1	0	0	6	1	0	0	0	0	0	0	0
Otu00856	Bacteria;Firmicutes;Clostridia;Clostridiales;Ruminococcaceae;unclassified_Ruminococcaceae	0	12	0	0	0	0	0	0	3	0	0	0	0	0	0	0	0	0	0	0	0	0	0	0	0	0	1	0	0	1	0	0	0	68	0	0	0	0	0	0	0	0
Otu00857	Bacteria;Firmicutes;Clostridia;Clostridiales;Lachnospiraceae;unclassified_Lachnospiraceae	0	0	0	0	12	30	0	19	6	0	1	0	0	0	4	1	0	0	0	12	0	0	0	0	0	0	0	0	0	0	0	0	0	0	0	0	0	0	0	0	0	0
Otu00858	Bacteria;Bacteroidetes;Bacteroidia;Bacteroidales;Bacteroidaceae;Bacteroides	16	2	0	0	0	0	18	6	0	0	0	1	0	0	0	2	0	0	1	0	0	1	0	0	0	0	0	2	0	5	0	5	0	1	21	0	0	0	0	0	2	1
Otu00859	Bacteria;Fusobacteria;Fusobacteriia;Fusobacteriales;Leptotrichiaceae;Sneathia	0	0	0	0	0	0	0	0	0	0	0	0	0	0	0	83	0	0	0	0	0	0	0	1	0	0	0	0	0	0	0	0	0	0	0	0	0	0	0	0	0	0
Otu00860	Bacteria;Firmicutes;Clostridia;Clostridiales;Lachnospiraceae;unclassified_Lachnospiraceae	6	2	0	1	3	1	0	2	1	2	0	0	0	4	4	6	1	0	1	0	30	0	0	0	0	0	4	2	5	2	0	0	1	0	3	0	0	1	0	0	0	2
Otu00861	Bacteria;Firmicutes;Clostridia;Clostridiales;Lachnospiraceae;unclassified_Lachnospiraceae	1	0	0	1	0	1	0	21	7	8	0	0	1	0	0	3	0	0	18	1	0	0	0	0	0	0	0	0	0	0	0	0	0	22	0	0	0	0	0	0	0	0
Otu00862	Bacteria;Firmicutes;Clostridia;Clostridiales;Lachnospiraceae;Roseburia	0	0	1	0	0	2	0	7	5	4	0	0	17	2	11	0	0	3	1	15	0	0	0	0	0	0	0	0	1	1	1	0	4	2	4	0	0	0	0	0	0	3
Otu00863	Bacteria;Bacteroidetes;Bacteroidia;Bacteroidales;Prevotellaceae;Prevotella	0	2	1	5	1	0	0	0	0	0	0	0	0	2	0	2	7	0	0	0	0	0	1	4	7	0	2	0	0	0	1	0	0	0	0	36	0	4	9	0	0	0
Otu00864	Bacteria;Bacteroidetes;Bacteroidia;Bacteroidales;unclassified_Bacteroidales;	0	0	9	0	0	0	0	0	0	0	0	0	0	0	2	0	0	0	0	0	21	0	4	3	0	0	17	18	0	0	0	0	0	0	0	5	0	0	0	5	0	0
Otu00865	Bacteria;Bacteroidetes;Bacteroidia;Bacteroidales;Porphyromonadaceae;unclassified_Porphyromonadaceae	0	83	0	0	0	0	0	0	0	0	0	0	0	0	0	1	0	0	0	0	0	0	0	0	0	0	0	0	0	0	0	0	0	0	0	0	0	0	0	0	0	0
Otu00866	Bacteria;unclassified_Bacteria;;;;	0	0	0	0	0	0	0	0	0	0	0	0	0	0	0	0	0	0	0	0	0	0	0	9	0	68	0	0	0	0	0	0	0	0	0	0	0	0	0	7	0	0
Otu00867	Bacteria;Bacteroidetes;Bacteroidia;Bacteroidales;Bacteroidaceae;Bacteroides	0	0	0	0	0	0	0	0	0	0	0	0	0	0	0	0	0	0	8	7	38	0	0	2	0	0	1	3	19	0	0	0	0	4	0	1	0	0	0	0	0	0
Otu00868	Bacteria;Actinobacteria;Actinobacteria;Coriobacteriales;Coriobacteriaceae;Collinsella	11	4	2	0	3	1	0	0	2	0	1	0	2	1	6	4	2	1	6	3	14	0	0	0	0	0	1	0	1	0	2	0	0	6	1	0	0	2	0	2	0	5
Otu00869	Bacteria;unclassified_Bacteria;;;;	2	0	0	0	0	0	24	0	1	0	0	1	0	0	0	1	0	0	0	1	5	2	0	0	0	0	0	1	0	0	0	17	7	1	18	0	0	0	0	0	2	0
Otu00870	Bacteria;Firmicutes;Negativicutes;Selenomonadales;Veillonellaceae;Megasphaera	0	0	0	0	0	0	0	0	0	0	0	0	0	0	0	0	0	0	0	0	0	0	0	25	0	0	0	0	0	0	0	0	0	0	0	0	0	32	26	0	0	0
Otu00871	Bacteria;Bacteroidetes;Bacteroidia;Bacteroidales;Bacteroidaceae;Bacteroides	0	0	3	0	0	0	0	0	0	0	0	0	0	0	0	0	0	0	0	0	0	0	31	0	0	0	5	0	0	0	0	0	0	0	0	22	0	0	0	0	22	0
Otu00872	Bacteria;Proteobacteria;Gammaproteobacteria;Enterobacteriales;Enterobacteriaceae;unclassified_Enterobacteriaceae	0	0	0	0	0	0	0	0	0	3	0	0	0	0	0	0	11	0	0	0	0	0	0	22	0	0	0	0	0	0	46	0	0	0	0	0	0	0	0	1	0	0
Otu00873	Bacteria;Firmicutes;Negativicutes;Selenomonadales;Veillonellaceae;Megasphaera	0	0	0	0	0	0	0	0	0	0	0	0	45	0	0	0	38	0	0	0	0	0	0	0	0	0	0	0	0	0	0	0	0	0	0	0	0	0	0	0	0	0
Otu00874	Bacteria;Bacteroidetes;Bacteroidia;Bacteroidales;unclassified_Bacteroidales;	0	0	0	0	0	0	0	0	0	0	0	0	0	0	0	0	0	0	0	0	0	0	0	0	0	0	0	0	0	0	0	0	0	0	0	0	83	0	0	0	0	0
Otu00875	Bacteria;Firmicutes;Clostridia;Clostridiales;Ruminococcaceae;unclassified_Ruminococcaceae	0	0	0	0	0	26	0	13	0	0	8	0	0	0	2	0	0	0	18	5	0	0	0	0	0	0	0	0	1	0	0	0	0	7	1	0	0	0	1	0	0	0
Otu00876	Bacteria;Firmicutes;Clostridia;Clostridiales;Ruminococcaceae;unclassified_Ruminococcaceae	0	0	0	0	0	0	0	0	0	0	0	0	0	0	0	0	0	0	0	3	0	0	0	0	0	0	0	0	0	0	0	0	0	0	0	0	79	0	0	0	0	0
Otu00877	Bacteria;Actinobacteria;Actinobacteria;Bifidobacteriales;Bifidobacteriaceae;unclassified_Bifidobacteriaceae	21	0	0	0	0	22	0	2	0	0	0	0	0	0	0	3	0	0	15	2	4	0	0	0	0	0	0	0	0	0	0	0	0	11	2	0	0	0	0	0	0	0
Otu00878	Bacteria;Firmicutes;Clostridia;Clostridiales;unclassified_Clostridiales;	3	1	7	0	2	3	2	16	1	3	4	0	0	0	4	0	0	7	0	0	15	0	0	0	0	0	0	9	0	0	0	0	0	1	1	0	0	0	0	0	2	1
Otu00879	Bacteria;Firmicutes;Clostridia;Clostridiales;Lachnospiraceae;unclassified_Lachnospiraceae	0	0	1	1	8	0	0	0	6	8	0	0	1	1	4	7	5	5	0	3	7	0	0	0	2	0	0	0	0	0	0	0	1	2	8	0	5	1	0	0	0	6
Otu00880	Bacteria;Firmicutes;Clostridia;Clostridiales;Lachnospiraceae;Clostridium XlVa	0	0	0	0	0	70	0	0	0	0	0	0	12	0	0	0	0	0	0	0	0	0	0	0	0	0	0	0	0	0	0	0	0	0	0	0	0	0	0	0	0	0
Otu00881	Bacteria;Firmicutes;Negativicutes;Selenomonadales;Acidaminococcaceae;Phascolarctobacterium	2	0	0	0	0	8	12	3	0	0	0	6	0	0	0	0	0	0	6	0	0	0	0	0	0	0	0	1	0	0	0	21	0	0	16	0	0	0	0	0	0	7
Otu00882	Bacteria;Proteobacteria;Betaproteobacteria;Burkholderiales;Sutterellaceae;Parasutterella	0	0	0	0	0	1	0	5	0	0	0	11	0	0	0	0	1	0	4	0	3	0	0	0	0	0	0	2	4	29	0	12	0	2	6	0	1	0	0	0	0	1
Otu00883	Bacteria;Bacteroidetes;Bacteroidia;Bacteroidales;Bacteroidaceae;Bacteroides	21	0	0	0	0	0	1	26	0	0	0	0	0	0	0	0	0	0	1	0	0	0	0	0	0	0	0	6	0	1	0	5	1	0	18	0	1	0	0	0	1	0
Otu00884	Bacteria;Firmicutes;Clostridia;Clostridiales;Ruminococcaceae;Gemmiger	36	7	0	1	0	12	0	9	0	2	0	0	0	1	0	6	0	1	0	0	0	0	0	0	1	0	0	0	0	0	0	0	0	1	4	0	1	0	0	0	0	0
Otu00885	Bacteria;Firmicutes;Clostridia;Clostridiales;Lachnospiraceae;unclassified_Lachnospiraceae	15	0	1	1	0	11	20	1	1	1	0	0	1	0	3	3	0	3	1	2	0	0	1	0	0	0	7	0	1	0	3	0	0	0	3	0	2	0	0	0	1	0
Otu00886	Bacteria;Bacteroidetes;Bacteroidia;Bacteroidales;Bacteroidaceae;Bacteroides	0	0	0	0	0	0	0	0	0	0	0	0	0	0	0	0	0	0	1	2	13	0	0	0	0	0	0	63	0	0	0	0	0	0	0	0	0	0	0	1	2	0
Otu00887	Bacteria;Firmicutes;Negativicutes;Selenomonadales;Veillonellaceae;Megamonas	0	1	3	1	0	0	0	0	0	0	0	0	0	0	7	3	2	0	0	0	0	0	0	2	0	0	6	21	0	0	1	0	2	0	0	8	0	0	5	20	0	0
Otu00888	Bacteria;Bacteroidetes;Bacteroidia;Bacteroidales;Bacteroidaceae;Bacteroides	0	0	0	0	0	0	0	0	0	0	0	0	0	0	11	0	0	0	0	0	0	0	0	0	5	34	0	0	31	0	0	0	0	0	0	0	0	0	0	1	0	0
Otu00889	Bacteria;Firmicutes;Negativicutes;Selenomonadales;Veillonellaceae;Megamonas	0	0	0	0	0	0	0	0	0	0	0	0	0	0	0	0	1	0	3	0	0	0	0	22	0	0	0	0	0	0	0	0	0	0	0	0	0	23	33	0	0	0
Otu00890	Bacteria;Firmicutes;unclassified_Firmicutes;;;	0	0	0	0	0	0	0	0	0	0	0	0	0	0	0	0	0	0	0	0	0	0	1	0	2	0	76	1	0	0	0	0	0	1	0	0	0	1	0	0	0	0
Otu00891	Bacteria;unclassified_Bacteria;;;;	0	0	0	0	0	0	0	0	0	0	53	0	0	5	1	23	0	0	0	0	0	0	0	0	0	0	0	0	0	0	0	0	0	0	0	0	0	0	0	0	0	0
Otu00892	Bacteria;Bacteroidetes;Bacteroidia;Bacteroidales;Bacteroidaceae;Bacteroides	2	1	0	0	0	4	0	2	0	0	1	3	0	0	0	0	0	0	4	0	0	0	0	0	0	0	0	2	1	55	0	0	0	1	4	0	0	0	0	0	1	0
Otu00893	Bacteria;Firmicutes;Clostridia;Clostridiales;Lachnospiraceae;unclassified_Lachnospiraceae	0	1	3	1	1	2	4	1	10	1	1	0	1	0	3	5	0	0	0	1	10	0	2	0	0	0	2	0	3	2	0	0	4	12	3	0	0	2	3	1	2	0
Otu00894	Bacteria;Firmicutes;Clostridia;Clostridiales;Lachnospiraceae;Roseburia	1	0	6	0	7	0	1	1	1	1	0	0	0	1	4	6	6	1	0	10	0	0	0	4	0	0	0	0	0	1	0	0	0	0	1	0	0	5	0	0	19	5
Otu00895	Bacteria;Bacteroidetes;Bacteroidia;Bacteroidales;Porphyromonadaceae;Barnesiella	0	0	0	0	0	24	0	13	2	0	0	1	0	0	0	2	0	0	0	14	6	0	0	0	1	0	0	0	5	0	0	0	1	11	0	0	1	0	0	0	0	0
Otu00896	Bacteria;Firmicutes;Erysipelotrichia;Erysipelotrichales;Erysipelotrichaceae;Holdemanella	0	2	0	1	4	0	0	0	15	0	9	0	0	2	15	5	3	1	0	5	12	0	1	2	0	0	0	0	0	0	1	0	0	0	0	0	0	3	0	0	0	0
Otu00897	Bacteria;Firmicutes;Clostridia;Clostridiales;Lachnospiraceae;Roseburia	2	0	1	2	1	4	19	5	10	1	0	0	0	0	4	5	0	2	3	1	0	0	0	0	0	0	9	1	0	1	0	0	0	7	3	0	0	0	0	0	0	0
Otu00898	Bacteria;Firmicutes;Negativicutes;Selenomonadales;Veillonellaceae;Megamonas	0	1	2	0	0	0	0	0	0	0	0	0	0	0	0	0	2	0	0	0	0	2	1	4	11	9	3	30	0	0	4	0	0	1	0	2	0	4	5	0	0	0
Otu00899	Bacteria;unclassified_Bacteria;;;;	0	0	0	1	7	0	0	20	8	0	27	0	1	5	0	12	0	0	0	0	0	0	0	0	0	0	0	0	0	0	0	0	0	0	0	0	0	0	0	0	0	0
Otu00900	Bacteria;Firmicutes;Clostridia;Clostridiales;unclassified_Clostridiales;	0	73	0	0	0	0	0	0	0	0	0	0	0	0	0	7	0	0	0	1	0	0	0	0	0	0	0	0	0	0	0	0	0	0	0	0	0	0	0	0	0	0
Otu00901	Bacteria;unclassified_Bacteria;;;;	10	0	0	0	0	0	13	0	0	0	0	0	0	0	0	4	0	0	0	0	0	0	0	0	0	0	0	4	0	0	0	0	5	2	40	0	0	0	0	0	2	0
Otu00902	Bacteria;Firmicutes;Bacilli;Lactobacillales;Lactobacillaceae;Lactobacillus	0	0	0	54	0	0	0	0	0	1	0	0	0	0	0	0	0	0	1	0	0	0	0	0	0	0	0	0	0	0	0	1	20	0	0	3	0	0	0	0	0	0
Otu00903	Bacteria;Firmicutes;Clostridia;Clostridiales;Ruminococcaceae;unclassified_Ruminococcaceae	0	0	0	0	8	25	0	0	1	6	0	0	2	9	0	16	1	0	1	8	0	0	0	0	0	0	0	0	0	0	2	0	0	1	0	0	0	0	0	0	0	0
Otu00904	Bacteria;Firmicutes;Clostridia;Clostridiales;Lachnospiraceae;unclassified_Lachnospiraceae	0	1	0	1	0	0	0	13	0	1	0	0	0	55	0	9	0	0	0	0	0	0	0	0	0	0	0	0	0	0	0	0	0	0	0	0	0	0	0	0	0	0
Otu00905	Bacteria;Firmicutes;Clostridia;Clostridiales;Ruminococcaceae;Butyricicoccus	0	1	0	0	0	0	1	3	4	4	0	0	1	13	20	2	0	0	1	7	5	0	2	2	0	1	0	0	1	1	2	0	1	1	2	0	0	3	1	0	0	0
Otu00906	Bacteria;Bacteroidetes;Bacteroidia;Bacteroidales;Porphyromonadaceae;Parabacteroides	0	1	0	0	0	0	0	0	0	0	0	0	0	0	1	0	0	0	0	26	0	0	1	0	1	2	0	0	23	0	0	0	0	0	4	0	5	0	0	0	15	0
Otu00907	Bacteria;Firmicutes;Negativicutes;Selenomonadales;Veillonellaceae;Megamonas	0	0	0	0	0	0	0	0	0	0	0	0	0	0	0	0	3	0	0	0	0	0	0	2	0	0	0	0	0	0	0	0	0	10	0	35	0	0	0	29	0	0
Otu00908	Bacteria;Firmicutes;Clostridia;Clostridiales;Ruminococcaceae;Clostridium IV	0	0	0	0	0	0	0	0	0	0	0	0	0	0	0	0	0	0	0	0	0	0	0	0	0	0	0	0	0	0	0	0	0	79	0	0	0	0	0	0	0	0
Otu00909	Bacteria;Firmicutes;Clostridia;Clostridiales;Lachnospiraceae;Lachnospiracea_incertae_sedis	44	0	1	0	0	0	21	0	1	0	0	0	0	0	0	2	0	2	0	0	0	0	0	0	0	0	6	1	0	0	0	0	1	0	0	0	0	0	0	0	0	0
Otu00910	Bacteria;Firmicutes;Clostridia;Clostridiales;Ruminococcaceae;unclassified_Ruminococcaceae	0	0	6	2	0	0	0	0	16	7	0	0	0	0	5	0	0	0	0	0	0	0	0	0	0	1	0	0	15	0	7	0	3	0	0	0	15	0	1	0	0	0
Otu00911	Bacteria;Firmicutes;Clostridia;Clostridiales;Lachnospiraceae;unclassified_Lachnospiraceae	0	0	1	1	5	0	0	8	3	7	6	6	2	9	4	14	3	0	0	3	1	0	0	0	0	0	0	0	0	0	0	0	1	3	0	0	0	0	0	0	0	1
Otu00912	Bacteria;Firmicutes;Clostridia;Clostridiales;Lachnospiraceae;Blautia	6	0	2	0	3	0	0	22	2	1	0	0	0	1	3	2	3	5	2	3	9	0	0	0	0	0	0	0	0	0	0	0	0	13	1	0	0	0	0	0	0	0
Otu00913	Bacteria;Firmicutes;Clostridia;Clostridiales;Lachnospiraceae;unclassified_Lachnospiraceae	0	2	0	0	6	1	4	4	0	3	0	0	1	16	4	1	2	1	1	0	12	0	0	0	0	0	1	1	4	3	0	0	0	3	3	0	1	3	0	0	0	1
Otu00914	Bacteria;Bacteroidetes;Bacteroidia;Bacteroidales;Porphyromonadaceae;Parabacteroides	0	0	0	0	0	0	0	0	0	1	2	0	0	0	0	0	0	0	0	0	22	0	0	0	0	0	0	0	1	0	0	0	1	0	45	0	0	0	0	0	6	0
Otu00915	Bacteria;Proteobacteria;Gammaproteobacteria;Enterobacteriales;Enterobacteriaceae;Escherichia/Shigella	0	0	0	0	0	1	0	0	0	2	1	1	0	0	0	0	4	0	0	0	0	35	0	18	0	4	1	1	0	0	3	3	0	0	0	0	0	0	0	4	0	0
Otu00916	Bacteria;Firmicutes;unclassified_Firmicutes;;;	0	3	0	0	0	0	0	0	0	0	0	0	0	0	0	0	0	1	1	0	0	0	0	4	0	0	0	0	0	1	0	0	57	0	0	10	0	0	0	1	0	0
Otu00917	Bacteria;Firmicutes;Clostridia;Clostridiales;Ruminococcaceae;unclassified_Ruminococcaceae	0	1	0	3	4	2	0	2	3	10	11	0	1	7	1	33	0	0	0	0	0	0	0	0	0	0	0	0	0	0	0	0	0	0	0	0	0	0	0	0	0	0
Otu00918	Bacteria;Firmicutes;unclassified_Firmicutes;;;	0	0	0	0	0	0	0	0	1	0	0	0	0	0	0	0	0	0	0	0	0	0	0	0	0	0	0	0	0	0	0	0	77	0	0	0	0	0	0	0	0	0
Otu00919	Bacteria;Bacteroidetes;Bacteroidia;Bacteroidales;Prevotellaceae;Prevotella	0	7	1	5	5	0	0	0	2	3	0	0	0	5	3	3	3	0	0	0	1	0	2	4	8	0	0	0	0	0	0	0	0	1	0	0	0	0	0	2	0	23
Otu00920	Bacteria;Bacteroidetes;Bacteroidia;Bacteroidales;unclassified_Bacteroidales;	0	2	0	0	0	0	0	0	1	0	0	0	0	0	1	0	0	0	0	0	0	0	34	4	12	0	0	0	0	0	7	0	0	0	0	0	0	0	1	16	0	0
Otu00921	Bacteria;Firmicutes;Clostridia;Clostridiales;Ruminococcaceae;unclassified_Ruminococcaceae	0	0	0	0	0	0	0	10	0	0	7	0	0	0	0	0	1	0	0	6	0	0	0	20	0	0	0	0	0	0	0	0	0	32	0	0	0	0	0	1	0	0
Otu00922	Bacteria;Firmicutes;Clostridia;Clostridiales;Lachnospiraceae;unclassified_Lachnospiraceae	0	3	1	2	2	4	0	6	7	4	0	0	1	0	7	1	3	3	3	0	18	0	0	0	0	0	2	0	0	0	0	0	2	0	7	0	0	0	0	0	0	1
Otu00923	Bacteria;Firmicutes;Clostridia;Clostridiales;Lachnospiraceae;unclassified_Lachnospiraceae	0	0	0	0	0	0	0	0	0	0	0	0	0	0	0	0	0	0	0	0	61	0	0	0	0	0	0	0	0	0	0	16	0	0	0	0	0	0	0	0	0	0
Otu00924	Bacteria;Firmicutes;Clostridia;Clostridiales;Lachnospiraceae;Lachnospiracea_incertae_sedis	13	0	0	0	0	0	30	0	10	0	0	0	0	0	1	3	0	0	0	0	4	0	0	0	0	0	4	0	0	4	0	1	0	2	0	0	0	0	0	0	5	0
Otu00925	Bacteria;Actinobacteria;Actinobacteria;Bifidobacteriales;Bifidobacteriaceae;unclassified_Bifidobacteriaceae	0	0	0	0	0	0	0	0	0	0	0	0	0	0	0	0	0	0	60	17	0	0	0	0	0	0	0	0	0	0	0	0	0	0	0	0	0	0	0	0	0	0
Otu00926	Bacteria;Firmicutes;Clostridia;Clostridiales;Lachnospiraceae;unclassified_Lachnospiraceae	0	0	0	0	0	1	37	3	16	1	0	0	0	0	3	0	0	0	0	1	0	0	0	0	0	0	1	0	0	3	0	0	8	0	2	0	1	0	0	0	0	0
Otu00927	Bacteria;Bacteroidetes;Bacteroidia;Bacteroidales;unclassified_Bacteroidales;	0	2	0	11	11	0	0	0	0	5	0	0	1	17	0	16	1	3	0	0	0	0	0	0	0	0	0	0	0	0	0	0	0	0	0	0	0	10	0	0	0	0
Otu00928	Bacteria;Bacteroidetes;Bacteroidia;Bacteroidales;Prevotellaceae;Prevotella	0	0	0	0	3	0	0	0	0	18	0	0	0	4	0	0	0	0	0	0	0	0	0	0	0	0	0	0	0	0	0	0	0	0	0	0	0	52	0	0	0	0
Otu00929	Bacteria;Bacteroidetes;Bacteroidia;Bacteroidales;Bacteroidaceae;Bacteroides	0	0	3	0	4	0	0	0	19	0	0	0	0	0	18	7	0	0	0	0	2	0	0	2	0	0	0	5	0	9	4	0	0	0	0	1	0	0	1	0	0	2
Otu00930	Bacteria;Firmicutes;Clostridia;Clostridiales;Lachnospiraceae;Clostridium XlVa	1	0	1	0	0	4	0	1	0	0	0	32	0	0	0	0	0	0	1	0	2	0	0	0	0	0	0	0	0	0	0	6	0	0	0	0	0	0	0	0	27	1
Otu00931	Bacteria;Firmicutes;Clostridia;Clostridiales;Lachnospiraceae;Blautia	0	1	11	0	0	5	0	5	0	0	0	0	2	0	7	0	4	3	3	5	1	0	0	6	1	0	0	18	0	0	0	0	2	0	0	0	0	0	2	0	0	0
Otu00932	Bacteria;Firmicutes;Clostridia;Clostridiales;Ruminococcaceae;unclassified_Ruminococcaceae	0	0	0	2	24	0	0	2	1	12	2	0	8	8	0	0	0	1	14	0	0	0	0	0	1	0	0	0	0	0	0	0	0	0	0	0	0	1	0	0	0	0
Otu00933	Bacteria;Firmicutes;Negativicutes;Selenomonadales;Veillonellaceae;Megamonas	0	1	2	0	0	0	0	0	0	0	0	0	0	0	4	2	1	0	2	0	0	4	1	4	2	10	13	3	0	0	0	0	0	3	0	6	0	2	1	15	0	0
Otu00934	Bacteria;Firmicutes;Clostridia;Clostridiales;Lachnospiraceae;unclassified_Lachnospiraceae	0	0	0	0	21	3	0	0	4	40	0	0	0	1	0	0	7	0	0	0	0	0	0	0	0	0	0	0	0	0	0	0	0	0	0	0	0	0	0	0	0	0
Otu00935	Bacteria;Bacteroidetes;Bacteroidia;Bacteroidales;Bacteroidaceae;Bacteroides	0	0	0	0	0	0	0	0	0	0	0	0	0	0	0	0	0	0	0	0	0	76	0	0	0	0	0	0	0	0	0	0	0	0	0	0	0	0	0	0	0	0
Otu00936	Bacteria;Bacteroidetes;Bacteroidia;Bacteroidales;Prevotellaceae;Prevotella	0	0	0	0	0	0	0	0	0	35	0	0	10	31	0	0	0	0	0	0	0	0	0	0	0	0	0	0	0	0	0	0	0	0	0	0	0	0	0	0	0	0
Otu00937	Bacteria;Firmicutes;Clostridia;Clostridiales;Lachnospiraceae;Lachnospiracea_incertae_sedis	0	9	0	1	0	0	0	23	0	2	1	0	0	0	1	20	0	0	0	0	0	0	0	0	0	0	0	0	0	3	1	0	9	0	6	0	0	0	0	0	0	0
Otu00938	Bacteria;Bacteroidetes;Bacteroidia;Bacteroidales;Prevotellaceae;Prevotella	0	0	0	0	0	0	0	0	0	42	0	0	13	8	0	0	12	0	0	0	0	0	0	0	0	0	0	0	0	0	0	0	0	0	0	0	0	1	0	0	0	0
Otu00939	Bacteria;Bacteroidetes;Bacteroidia;Bacteroidales;unclassified_Bacteroidales;	0	0	0	1	0	0	0	0	0	0	0	0	1	2	6	16	0	0	0	0	0	0	0	0	0	0	0	0	0	0	0	0	0	50	0	0	0	0	0	0	0	0
Otu00940	Bacteria;Firmicutes;Negativicutes;Selenomonadales;Veillonellaceae;Megasphaera	0	0	0	0	0	0	0	0	0	0	0	0	0	0	0	0	10	0	11	0	0	0	0	13	0	0	0	0	0	0	0	0	0	0	0	0	0	15	27	0	0	0
Otu00941	Bacteria;unclassified_Bacteria;;;;	0	0	0	0	0	38	0	1	0	0	0	11	0	0	0	0	0	0	22	1	0	0	0	0	0	0	0	0	2	0	0	0	0	0	0	0	0	0	0	0	0	0
Otu00942	Bacteria;Firmicutes;Clostridia;Clostridiales;Ruminococcaceae;Faecalibacterium	0	2	0	0	0	0	0	0	0	0	0	0	0	0	2	0	0	0	0	22	0	0	0	0	1	0	0	0	5	0	0	0	0	0	3	0	5	0	0	0	35	0
Otu00943	Bacteria;Firmicutes;Clostridia;Clostridiales;Lachnospiraceae;unclassified_Lachnospiraceae	0	1	2	4	1	0	30	3	2	3	0	0	3	0	2	0	1	2	0	2	0	0	2	0	0	0	2	0	4	4	0	0	0	3	2	0	0	0	0	0	0	2
Otu00944	Bacteria;Proteobacteria;Gammaproteobacteria;Enterobacteriales;Enterobacteriaceae;unclassified_Enterobacteriaceae	0	0	0	0	0	0	0	0	0	0	0	0	0	0	0	0	0	0	0	0	0	75	0	0	0	0	0	0	0	0	0	0	0	0	0	0	0	0	0	0	0	0
Otu00945	Bacteria;Firmicutes;Erysipelotrichia;Erysipelotrichales;Erysipelotrichaceae;unclassified_Erysipelotrichaceae	8	0	0	0	0	0	0	2	0	0	0	0	0	0	0	0	0	0	0	0	0	0	0	0	1	0	0	0	1	21	0	0	0	40	0	0	0	0	0	0	2	0
Otu00946	Bacteria;Bacteroidetes;Bacteroidia;Bacteroidales;Bacteroidaceae;Bacteroides	0	56	1	0	0	0	0	0	0	0	0	0	0	0	0	0	0	0	0	0	0	0	1	0	0	0	0	0	0	0	0	0	0	0	0	0	0	0	0	0	17	0
Otu00947	Bacteria;Firmicutes;Clostridia;Clostridiales;Lachnospiraceae;unclassified_Lachnospiraceae	2	0	5	0	3	33	8	2	0	0	0	0	0	1	3	6	0	0	1	0	0	0	0	0	0	0	0	0	0	0	1	0	0	0	9	0	0	0	0	0	0	1
Otu00948	Bacteria;Actinobacteria;Actinobacteria;Bifidobacteriales;Bifidobacteriaceae;unclassified_Bifidobacteriaceae	0	0	0	0	0	20	0	4	0	0	0	1	0	0	0	0	0	0	48	0	0	0	0	0	0	0	0	0	0	0	0	0	0	1	0	0	0	0	0	0	0	0
Otu00949	Bacteria;Firmicutes;Clostridia;Clostridiales;Lachnospiraceae;Clostridium XlVb	10	0	3	2	1	0	0	0	3	2	0	0	1	3	1	1	1	0	0	2	7	0	3	1	0	0	3	0	2	6	2	13	0	0	0	0	1	0	1	0	0	5
Otu00950	Bacteria;Firmicutes;Clostridia;Clostridiales;Lachnospiraceae;unclassified_Lachnospiraceae	0	0	0	0	1	1	0	1	27	0	0	0	0	0	0	3	0	5	0	5	0	0	0	0	2	0	0	0	0	0	4	0	0	25	0	0	0	0	0	0	0	0
Otu00951	Bacteria;Proteobacteria;Gammaproteobacteria;Enterobacteriales;Enterobacteriaceae;Escherichia/Shigella	0	0	0	0	0	0	0	0	0	2	0	0	0	0	0	0	6	0	0	0	0	52	0	6	0	0	0	0	0	1	2	5	0	0	0	0	0	0	0	0	0	0
Otu00952	Bacteria;Bacteroidetes;Bacteroidia;Bacteroidales;Porphyromonadaceae;Barnesiella	0	0	0	0	0	41	0	12	5	0	4	1	0	0	0	0	0	0	0	1	0	0	0	0	0	0	0	0	1	2	0	0	0	7	0	0	0	0	0	0	0	0
Otu00953	Bacteria;Firmicutes;Clostridia;Clostridiales;Lachnospiraceae;unclassified_Lachnospiraceae	0	1	0	0	0	0	0	0	0	0	0	0	0	0	4	0	1	0	0	0	0	5	0	4	1	25	13	5	0	0	0	0	0	1	0	7	0	3	2	2	0	0
Otu00954	Bacteria;Firmicutes;Clostridia;Clostridiales;Lachnospiraceae;Roseburia	0	0	0	0	0	1	0	0	8	0	0	0	0	0	0	0	0	6	0	0	0	0	0	0	0	0	0	0	1	1	0	0	56	0	1	0	0	0	0	0	0	0
Otu00955	Bacteria;Firmicutes;Negativicutes;Selenomonadales;Veillonellaceae;Megamonas	0	0	1	0	0	0	0	0	0	0	0	0	0	0	1	0	0	0	1	0	0	0	0	0	0	0	58	0	0	0	0	0	0	2	0	1	0	0	0	10	0	0
Otu00956	Bacteria;Bacteroidetes;Bacteroidia;Bacteroidales;Prevotellaceae;unclassified_Prevotellaceae	0	0	0	0	0	0	0	0	0	0	0	0	0	0	0	0	0	0	0	0	0	0	0	0	0	0	0	0	0	0	0	0	0	0	0	0	0	0	0	74	0	0
Otu00957	Bacteria;Actinobacteria;Actinobacteria;Bifidobacteriales;Bifidobacteriaceae;unclassified_Bifidobacteriaceae	0	0	0	0	0	0	0	0	0	0	0	0	0	0	0	0	0	0	73	0	0	0	0	0	0	0	0	0	0	0	0	0	0	0	0	0	0	0	1	0	0	0
Otu00958	Bacteria;Firmicutes;Clostridia;Clostridiales;Ruminococcaceae;unclassified_Ruminococcaceae	0	0	0	0	1	16	0	0	1	0	4	0	0	0	0	0	0	0	48	4	0	0	0	0	0	0	0	0	0	0	0	0	0	0	0	0	0	0	0	0	0	0
Otu00959	Bacteria;Bacteroidetes;Bacteroidia;Bacteroidales;Prevotellaceae;Prevotella	0	0	0	4	3	0	0	0	3	10	0	0	6	1	0	1	5	4	0	0	0	0	0	0	15	0	0	0	0	0	7	0	0	0	0	0	0	15	0	0	0	0
Otu00960	Bacteria;Firmicutes;Clostridia;Clostridiales;Lachnospiraceae;unclassified_Lachnospiraceae	1	0	0	0	0	8	27	4	6	0	0	0	2	0	1	2	0	0	0	1	0	0	0	0	0	0	3	0	0	2	0	0	3	1	9	0	1	0	0	0	3	0
Otu00961	Bacteria;Fusobacteria;Fusobacteriia;Fusobacteriales;Fusobacteriaceae;Fusobacterium	0	0	0	0	0	0	0	0	0	0	0	0	0	0	0	0	0	0	0	0	0	43	0	0	0	20	0	0	0	0	0	0	0	0	0	0	4	0	0	0	6	0
Otu00962	Bacteria;Firmicutes;Clostridia;Clostridiales;Lachnospiraceae;unclassified_Lachnospiraceae	2	5	9	1	2	0	1	2	4	5	0	0	1	1	5	6	0	3	0	2	0	0	0	0	1	0	1	0	0	0	0	0	1	0	1	0	0	1	0	0	19	0
Otu00963	Bacteria;unclassified_Bacteria;;;;	24	2	0	0	0	3	0	11	0	0	0	0	0	0	0	3	0	0	0	0	0	0	0	0	0	0	0	0	0	4	0	0	2	0	23	0	1	0	0	0	0	0
Otu00964	Bacteria;Firmicutes;Clostridia;Clostridiales;Lachnospiraceae;unclassified_Lachnospiraceae	2	1	0	0	0	6	3	0	2	0	0	0	0	0	0	0	0	3	0	0	0	0	0	0	0	0	2	0	0	0	0	0	52	0	1	0	1	0	0	0	0	0
Otu00965	Bacteria;unclassified_Bacteria;;;;	0	6	1	6	2	0	0	0	2	4	0	0	11	3	0	0	4	12	0	0	0	0	5	0	1	0	5	0	0	0	0	0	0	0	0	1	0	2	4	0	0	4
Otu00966	Bacteria;Bacteroidetes;Bacteroidia;Bacteroidales;Porphyromonadaceae;Parabacteroides	0	0	0	0	0	8	8	0	0	0	13	0	0	1	0	3	0	0	0	1	0	6	0	0	0	0	0	0	0	1	0	3	0	3	23	0	0	0	0	0	2	0
Otu00967	Bacteria;Actinobacteria;Actinobacteria;Actinomycetales;Micrococcaceae;Rothia	10	1	1	2	0	0	0	3	2	0	1	2	1	0	3	0	2	5	0	0	0	0	0	0	0	0	2	0	1	1	0	2	24	0	1	0	5	0	0	1	0	2
Otu00968	Bacteria;Firmicutes;Clostridia;Clostridiales;Ruminococcaceae;unclassified_Ruminococcaceae	0	0	0	0	0	6	0	4	1	0	48	0	0	0	1	0	0	0	11	1	0	0	0	0	0	0	0	0	0	0	0	0	0	0	0	0	0	0	0	0	0	0
Otu00969	Bacteria;Firmicutes;Clostridia;Clostridiales;Lachnospiraceae;Blautia	9	0	3	0	4	1	1	12	1	0	0	0	0	1	1	1	0	4	1	8	4	0	0	0	0	0	0	2	1	0	0	0	4	8	6	0	0	0	0	0	0	0
Otu00970	Bacteria;Firmicutes;Clostridia;Clostridiales;Lachnospiraceae;Ruminococcus2	0	7	1	2	0	0	8	0	8	0	0	0	0	1	0	0	0	0	2	10	17	0	0	0	0	0	0	0	1	1	0	0	0	0	6	0	0	3	0	2	0	3
Otu00971	Bacteria;Bacteroidetes;Bacteroidia;Bacteroidales;Prevotellaceae;Prevotella	0	0	0	13	3	0	0	0	0	19	0	0	0	0	0	0	0	0	0	0	0	0	0	0	0	0	0	0	0	0	37	0	0	0	0	0	0	0	0	0	0	0
Otu00972	Bacteria;Bacteroidetes;Bacteroidia;Bacteroidales;Porphyromonadaceae;Parabacteroides	0	0	0	0	0	0	0	0	0	6	64	0	0	1	0	0	0	0	0	0	0	0	0	0	0	0	0	0	0	0	1	0	0	0	0	0	0	0	0	0	0	0
Otu00973	Bacteria;Bacteroidetes;Bacteroidia;Bacteroidales;Prevotellaceae;Prevotella	0	0	1	8	1	0	0	0	2	3	0	0	14	6	1	0	0	11	0	0	0	0	1	0	1	0	14	3	0	0	4	0	0	0	0	1	0	0	0	0	0	1
Otu00974	Bacteria;Bacteroidetes;Bacteroidia;Bacteroidales;Bacteroidaceae;Bacteroides	0	0	0	0	0	0	0	0	0	0	0	0	0	0	0	0	0	0	0	11	0	0	0	0	0	0	0	0	59	0	0	0	0	0	0	0	0	0	0	1	1	0
Otu00975	Bacteria;Firmicutes;Clostridia;Clostridiales;Ruminococcaceae;unclassified_Ruminococcaceae	0	0	0	0	1	7	0	8	1	0	44	0	0	0	3	0	0	0	6	1	0	0	0	0	0	0	0	0	0	0	0	0	0	0	0	0	0	0	0	0	0	0
Otu00976	Bacteria;Firmicutes;Clostridia;Clostridiales;Lachnospiraceae;unclassified_Lachnospiraceae	1	1	1	3	6	0	0	8	1	16	2	0	4	0	8	1	1	1	1	0	8	0	1	0	0	0	0	0	1	0	1	0	3	2	0	0	0	0	0	0	0	0
Otu00977	Bacteria;Firmicutes;Clostridia;Clostridiales;Lachnospiraceae;Lachnospiracea_incertae_sedis	9	0	1	0	8	4	5	4	6	1	0	0	0	0	5	1	0	0	1	1	0	0	1	0	1	0	2	1	0	0	0	0	3	2	3	0	0	0	0	0	11	1
Otu00978	Bacteria;Firmicutes;unclassified_Firmicutes;;;	10	0	0	0	0	14	2	8	0	0	0	5	0	0	0	0	0	0	13	0	0	0	0	0	0	0	0	0	0	0	0	10	0	0	9	0	0	0	0	0	0	0
Otu00979	Bacteria;Bacteroidetes;Bacteroidia;Bacteroidales;Bacteroidaceae;Bacteroides	0	0	0	0	0	15	0	0	1	0	0	0	0	0	0	0	0	0	0	0	13	0	0	1	0	0	0	0	8	27	0	0	0	5	0	0	1	0	0	0	0	0
Otu00980	Bacteria;Firmicutes;Negativicutes;Selenomonadales;Veillonellaceae;Megamonas	0	1	0	0	0	0	0	0	0	0	0	0	0	0	10	4	0	0	0	0	0	0	0	2	11	1	33	3	0	0	0	0	3	0	0	0	0	3	0	0	0	0
Otu00981	Bacteria;Firmicutes;Clostridia;Clostridiales;unclassified_Clostridiales;	0	0	0	0	0	27	0	0	0	0	44	0	0	0	0	0	0	0	0	0	0	0	0	0	0	0	0	0	0	0	0	0	0	0	0	0	0	0	0	0	0	0
Otu00982	Bacteria;unclassified_Bacteria;;;;	0	0	0	0	4	0	0	0	23	0	0	0	1	9	8	17	0	0	0	7	0	0	0	0	0	0	0	0	0	0	2	0	0	0	0	0	0	0	0	0	0	0
Otu00983	Bacteria;Bacteroidetes;Bacteroidia;Bacteroidales;Prevotellaceae;Prevotella	0	0	0	0	0	0	0	0	0	47	0	0	0	8	0	0	5	0	0	0	0	0	0	0	0	0	0	0	0	0	0	0	0	0	0	0	0	11	0	0	0	0
Otu00984	Bacteria;Firmicutes;Clostridia;Clostridiales;Lachnospiraceae;Lachnospiracea_incertae_sedis	0	1	0	3	6	0	0	10	9	2	0	0	0	0	5	16	0	5	1	0	0	0	0	0	0	0	3	0	0	0	1	0	4	0	2	0	0	0	0	0	0	2
Otu00985	Bacteria;Firmicutes;Clostridia;Clostridiales;Lachnospiraceae;Roseburia	0	0	0	0	3	0	0	7	21	6	0	0	2	2	0	1	4	4	0	3	0	0	0	0	0	0	1	1	0	0	0	0	9	4	0	0	1	1	0	0	0	0
Otu00986	Bacteria;Firmicutes;Clostridia;Clostridiales;Lachnospiraceae;unclassified_Lachnospiraceae	7	1	1	2	2	4	4	6	6	3	0	0	1	2	3	0	0	1	0	2	0	0	1	0	0	0	1	0	1	0	0	0	2	1	3	0	0	0	0	0	16	0
Otu00987	Bacteria;Firmicutes;Negativicutes;Selenomonadales;Acidaminococcaceae;Phascolarctobacterium	0	0	19	9	1	0	0	0	0	6	0	0	1	8	3	11	1	1	0	0	5	0	0	0	0	0	0	0	0	0	0	0	2	0	0	0	0	0	3	0	0	0
Otu00988	Bacteria;Firmicutes;Clostridia;Clostridiales;Lachnospiraceae;unclassified_Lachnospiraceae	0	0	6	0	0	0	0	0	0	0	0	0	0	0	0	0	52	0	0	0	0	0	0	2	0	0	0	0	0	0	0	0	0	6	0	0	0	0	4	0	0	0
Otu00989	Bacteria;Firmicutes;Clostridia;Clostridiales;Lachnospiraceae;unclassified_Lachnospiraceae	0	0	0	0	0	0	0	6	0	0	0	0	0	0	0	0	0	0	0	0	0	0	0	0	0	0	0	0	1	63	0	0	0	0	0	0	0	0	0	0	0	0
Otu00990	Bacteria;Firmicutes;Clostridia;Clostridiales;Ruminococcaceae;Clostridium IV	0	0	0	0	0	0	0	4	0	0	64	0	0	0	2	0	0	0	0	0	0	0	0	0	0	0	0	0	0	0	0	0	0	0	0	0	0	0	0	0	0	0
Otu00991	Bacteria;Bacteroidetes;Bacteroidia;Bacteroidales;Bacteroidaceae;Bacteroides	0	0	0	0	0	26	34	4	1	0	0	0	0	0	0	1	0	0	0	0	0	0	0	0	0	2	0	0	0	0	0	2	0	0	0	0	0	0	0	0	0	0
Otu00992	Bacteria;Proteobacteria;unclassified_Proteobacteria;;;	0	0	0	0	6	0	0	0	0	59	0	0	0	3	0	2	0	0	0	0	0	0	0	0	0	0	0	0	0	0	0	0	0	0	0	0	0	0	0	0	0	0
Otu00993	Bacteria;Firmicutes;Clostridia;Clostridiales;Lachnospiraceae;unclassified_Lachnospiraceae	7	3	6	6	2	0	0	7	6	3	0	0	0	0	1	1	4	0	0	2	1	0	2	0	0	0	0	0	0	0	0	0	0	3	1	0	0	2	0	0	7	5
Otu00994	Bacteria;Firmicutes;Clostridia;Clostridiales;Ruminococcaceae;Faecalibacterium	17	0	0	0	0	0	0	0	1	2	0	0	4	0	0	0	0	2	1	6	4	0	0	0	0	0	2	0	0	0	0	0	5	6	12	0	1	0	1	1	4	0
Otu00995	Bacteria;Firmicutes;Clostridia;Clostridiales;unclassified_Clostridiales;	0	0	0	0	23	0	0	0	0	0	9	0	6	26	0	3	0	0	0	0	0	0	0	0	0	0	0	0	0	0	2	0	0	0	0	0	0	0	0	0	0	0
Otu00996	Bacteria;Firmicutes;Clostridia;Clostridiales;Lachnospiraceae;unclassified_Lachnospiraceae	2	0	0	0	0	0	2	1	4	0	0	0	1	2	0	0	1	0	0	0	2	11	0	1	0	2	1	12	0	0	0	15	0	6	0	0	1	2	1	0	1	0
Otu00997	Bacteria;Firmicutes;Clostridia;Clostridiales;Lachnospiraceae;unclassified_Lachnospiraceae	0	0	0	0	4	11	6	4	18	0	0	0	1	2	4	3	0	3	0	1	0	0	0	0	0	0	0	0	0	9	2	0	0	0	0	0	0	0	0	0	0	0
Otu00998	Bacteria;Firmicutes;Bacilli;Lactobacillales;Lactobacillaceae;Lactobacillus	0	1	0	0	0	0	0	0	2	0	0	0	0	0	0	0	0	0	0	0	0	0	0	0	0	0	0	0	1	0	0	2	40	0	0	22	0	0	0	0	0	0
Otu00999	Bacteria;Bacteroidetes;Bacteroidia;Bacteroidales;Prevotellaceae;Prevotella	0	0	0	0	0	0	0	0	0	27	0	0	0	7	0	0	5	0	0	0	0	0	0	0	0	0	0	0	0	0	0	0	0	0	0	0	0	29	0	0	0	0
Otu01000	Bacteria;Firmicutes;Clostridia;Clostridiales;Lachnospiraceae;unclassified_Lachnospiraceae	9	1	1	0	1	5	0	17	5	6	0	0	2	1	3	0	0	1	1	2	0	0	0	0	1	0	0	0	0	2	0	0	3	4	2	0	0	0	0	0	0	1
Otu01001	Bacteria;Firmicutes;Clostridia;Clostridiales;Lachnospiraceae;Roseburia	5	0	4	1	1	0	3	2	3	4	0	0	2	0	2	1	0	3	0	2	0	0	1	0	0	0	0	0	0	0	0	0	0	1	2	0	1	0	0	0	28	2
Otu01002	Bacteria;Firmicutes;Clostridia;Clostridiales;Ruminococcaceae;unclassified_Ruminococcaceae	13	2	6	0	1	0	1	5	0	1	0	1	2	0	0	1	0	0	2	0	1	0	0	0	0	0	0	0	0	2	0	0	3	7	16	0	0	1	0	0	1	1
Otu01003	Bacteria;Bacteroidetes;Bacteroidia;Bacteroidales;Bacteroidaceae;Bacteroides	0	0	0	0	0	0	0	0	0	0	0	0	0	0	0	0	0	0	0	0	7	0	0	0	0	1	0	0	58	0	0	0	0	0	0	0	0	0	0	1	0	0
Otu01004	Bacteria;Firmicutes;unclassified_Firmicutes;;;	0	7	0	0	0	0	0	0	0	0	0	0	3	1	0	0	1	0	0	2	0	0	8	0	0	0	0	0	8	0	2	0	0	11	0	0	12	0	0	1	11	0
Otu01005	Bacteria;Firmicutes;Clostridia;Clostridiales;Lachnospiraceae;unclassified_Lachnospiraceae	0	0	0	0	1	1	2	0	2	2	0	0	0	3	1	6	0	0	0	2	17	1	3	0	0	0	4	0	3	2	1	0	0	10	0	0	0	0	3	1	1	1
Otu01006	Bacteria;Firmicutes;Bacilli;Lactobacillales;Streptococcaceae;Streptococcus	0	0	0	7	0	1	1	1	18	1	4	8	0	0	0	0	1	10	2	0	1	0	0	0	0	0	0	0	0	1	0	6	2	1	1	0	0	0	0	1	0	0
Otu01007	Bacteria;Firmicutes;Clostridia;Clostridiales;Peptostreptococcaceae;Intestinibacter	0	0	0	0	29	22	0	0	0	0	0	15	0	1	0	0	0	0	0	0	0	0	0	0	0	0	0	0	0	0	0	0	0	0	0	0	0	0	0	0	0	0
Otu01008	Bacteria;Firmicutes;Clostridia;Clostridiales;Lachnospiraceae;Lachnospiracea_incertae_sedis	0	0	0	2	0	0	14	10	2	2	0	0	0	0	1	3	0	0	0	0	0	0	0	0	0	0	0	0	0	3	0	1	9	2	0	0	2	0	0	0	16	0
Otu01009	Bacteria;Firmicutes;Clostridia;Clostridiales;Lachnospiraceae;unclassified_Lachnospiraceae	0	0	0	0	22	1	2	0	0	0	2	24	0	2	0	0	3	0	0	0	0	0	1	0	0	0	9	0	1	0	0	0	0	0	0	0	0	0	0	0	0	0
Otu01010	Bacteria;Firmicutes;Negativicutes;Selenomonadales;Veillonellaceae;Megamonas	0	0	0	0	0	0	0	0	0	0	0	0	0	0	1	0	5	0	0	0	0	0	0	4	0	0	0	11	0	0	0	0	0	0	0	40	0	0	3	3	0	0
Otu01011	Bacteria;unclassified_Bacteria;;;;	0	1	15	1	6	0	0	0	0	0	0	0	8	4	0	0	3	6	0	0	0	0	2	0	2	0	4	2	0	0	4	0	0	0	0	1	0	5	0	0	0	3
Otu01012	Bacteria;Firmicutes;Clostridia;Clostridiales;Ruminococcaceae;Oscillibacter	0	0	0	1	5	0	0	0	0	17	3	0	4	11	4	22	0	0	0	0	0	0	0	0	0	0	0	0	0	0	0	0	0	0	0	0	0	0	0	0	0	0
Otu01013	Bacteria;unclassified_Bacteria;;;;	0	0	4	1	0	0	0	0	0	0	0	0	0	0	3	0	4	0	0	0	0	0	0	3	0	0	0	5	0	0	0	0	0	0	0	47	0	0	0	0	0	0
Otu01014	Bacteria;Firmicutes;Clostridia;Clostridiales;Lachnospiraceae;Lachnospiracea_incertae_sedis	0	3	0	1	24	20	0	1	0	16	0	0	0	1	0	0	0	0	0	0	0	0	0	0	0	0	0	0	0	0	1	0	0	0	0	0	0	0	0	0	0	0
Otu01015	Bacteria;Bacteroidetes;Bacteroidia;Bacteroidales;Prevotellaceae;Alloprevotella	0	0	0	0	0	0	0	0	0	0	0	0	1	3	6	12	1	0	0	0	0	0	0	0	0	0	0	0	0	0	0	0	0	44	0	0	0	0	0	0	0	0
Otu01016	Bacteria;Firmicutes;Clostridia;Clostridiales;Lachnospiraceae;Lachnospiracea_incertae_sedis	0	4	0	0	2	1	0	25	7	3	0	2	0	0	2	8	1	2	1	0	0	0	0	0	0	0	1	0	0	1	0	0	3	0	3	0	0	0	0	0	0	0
Otu01017	Bacteria;Firmicutes;Clostridia;Clostridiales;Lachnospiraceae;unclassified_Lachnospiraceae	0	0	0	2	3	0	0	6	4	4	1	0	0	0	14	7	0	3	1	1	0	0	0	0	0	0	1	0	1	0	2	0	0	0	6	0	0	0	0	0	0	10
Otu01018	Bacteria;Bacteroidetes;Bacteroidia;Bacteroidales;Porphyromonadaceae;Parabacteroides	0	0	0	0	0	0	0	0	0	0	0	0	0	0	0	0	0	0	0	9	0	0	0	0	0	12	0	0	12	0	0	0	0	0	0	0	14	0	0	0	19	0
Otu01019	Bacteria;Actinobacteria;Actinobacteria;Bifidobacteriales;Bifidobacteriaceae;unclassified_Bifidobacteriaceae	0	0	0	0	0	16	0	0	0	0	0	25	0	0	0	1	0	0	18	0	0	0	0	0	0	0	0	0	0	0	0	0	0	6	0	0	0	0	0	0	0	0
Otu01020	Bacteria;Firmicutes;Clostridia;Clostridiales;Lachnospiraceae;unclassified_Lachnospiraceae	0	0	1	1	2	0	5	1	1	0	0	14	1	3	3	0	2	0	4	0	16	0	0	0	0	0	1	1	2	1	0	3	1	2	0	0	1	0	0	0	0	0
Otu01021	Bacteria;unclassified_Bacteria;;;;	0	0	0	0	0	0	0	0	0	0	0	46	0	0	0	0	0	0	20	0	0	0	0	0	0	0	0	0	0	0	0	0	0	0	0	0	0	0	0	0	0	0
Otu01022	Bacteria;Firmicutes;Clostridia;Clostridiales;Lachnospiraceae;unclassified_Lachnospiraceae	0	1	0	0	0	2	15	14	3	5	0	0	2	3	0	4	0	2	0	0	0	0	0	0	0	0	0	0	0	5	0	0	1	2	2	0	0	0	0	0	5	0
Otu01023	Bacteria;Firmicutes;Clostridia;Clostridiales;Peptostreptococcaceae;Romboutsia	0	0	0	0	1	11	0	0	0	0	10	38	1	1	0	0	0	0	0	0	0	0	0	0	0	0	0	0	0	4	0	0	0	0	0	0	0	0	0	0	0	0
Otu01024	Bacteria;Firmicutes;Clostridia;Clostridiales;Lachnospiraceae;unclassified_Lachnospiraceae	0	5	0	0	0	0	0	2	27	0	0	0	1	0	0	5	0	5	0	2	0	0	0	0	0	0	0	0	0	0	6	0	0	12	0	0	0	1	0	0	0	0
Otu01025	Bacteria;Bacteroidetes;Bacteroidia;Bacteroidales;Bacteroidaceae;Bacteroides	17	1	0	0	0	1	6	1	0	0	0	0	0	0	0	1	0	0	0	0	2	0	0	0	0	0	0	4	0	0	0	0	1	0	27	0	0	0	0	0	4	0
Otu01026	Bacteria;Firmicutes;Clostridia;Clostridiales;Ruminococcaceae;Ruminococcus	0	0	0	0	0	0	0	13	0	0	0	0	0	0	11	1	0	0	0	28	0	0	0	0	1	0	0	0	1	0	1	0	0	0	1	0	0	0	8	0	0	0
Otu01027	Bacteria;Firmicutes;Clostridia;Clostridiales;Ruminococcaceae;Faecalibacterium	5	0	0	0	0	0	2	1	0	0	0	0	0	0	0	0	0	0	0	1	2	0	1	0	0	0	0	3	2	1	0	0	0	0	29	0	4	0	0	0	12	2
Otu01028	Bacteria;Actinobacteria;Actinobacteria;Bifidobacteriales;Bifidobacteriaceae;Bifidobacterium	0	0	0	0	0	4	0	0	0	0	0	0	0	0	0	0	0	0	1	25	0	0	0	0	0	0	0	0	14	4	0	0	2	3	0	0	0	0	0	0	11	1
Otu01029	Bacteria;Firmicutes;Clostridia;Clostridiales;Lachnospiraceae;unclassified_Lachnospiraceae	0	0	3	1	0	3	3	7	2	0	0	0	3	1	1	0	0	16	0	3	0	0	0	0	1	0	0	0	0	0	0	0	1	1	2	0	0	0	0	0	15	2
Otu01030	Bacteria;Fusobacteria;Fusobacteriia;Fusobacteriales;Fusobacteriaceae;unclassified_Fusobacteriaceae	0	0	0	0	0	0	0	0	0	0	0	0	0	0	0	0	0	0	0	0	0	0	0	1	0	1	0	0	0	0	0	63	0	0	0	0	0	0	0	0	0	0
Otu01031	Bacteria;Actinobacteria;Actinobacteria;Bifidobacteriales;Bifidobacteriaceae;unclassified_Bifidobacteriaceae	2	0	0	0	0	0	0	1	0	0	0	0	0	0	0	0	0	0	62	0	0	0	0	0	0	0	0	0	0	0	0	0	0	0	0	0	0	0	0	0	0	0
Otu01032	Bacteria;Firmicutes;Clostridia;Clostridiales;Lachnospiraceae;unclassified_Lachnospiraceae	0	0	0	0	0	0	0	43	0	0	0	0	0	22	0	0	0	0	0	0	0	0	0	0	0	0	0	0	0	0	0	0	0	0	0	0	0	0	0	0	0	0
Otu01033	Bacteria;Bacteroidetes;Bacteroidia;Bacteroidales;Prevotellaceae;Prevotella	0	2	1	0	5	0	0	0	2	1	0	0	2	2	11	3	0	0	0	0	2	0	1	1	2	0	0	19	0	0	2	0	0	0	0	1	0	1	0	0	0	7
Otu01034	Bacteria;unclassified_Bacteria;;;;	44	1	0	0	0	0	2	0	1	0	0	1	0	0	0	1	0	0	0	0	1	0	0	0	0	0	0	0	0	2	0	0	0	2	10	0	0	0	0	0	0	0
Otu01035	Bacteria;unclassified_Bacteria;;;;	0	0	0	0	0	0	0	0	0	0	0	0	0	0	0	0	0	0	0	0	0	0	0	62	0	0	3	0	0	0	0	0	0	0	0	0	0	0	0	0	0	0
Otu01036	Bacteria;Bacteroidetes;Bacteroidia;Bacteroidales;Bacteroidaceae;Bacteroides	0	0	0	0	0	0	0	0	0	0	0	0	0	0	0	0	0	0	1	9	25	0	0	0	0	2	0	10	13	0	0	0	0	3	0	0	0	0	0	0	1	0
Otu01037	Bacteria;Firmicutes;Bacilli;Lactobacillales;Streptococcaceae;Streptococcus	0	1	0	0	0	1	0	0	1	0	0	0	0	0	0	0	0	9	7	0	0	0	0	0	0	0	0	0	2	4	0	0	39	0	0	0	0	0	0	0	0	0
Otu01038	Bacteria;Firmicutes;Clostridia;Clostridiales;Lachnospiraceae;unclassified_Lachnospiraceae	0	0	0	0	0	1	0	4	0	9	3	2	1	14	1	23	0	1	5	0	0	0	0	0	0	0	0	0	0	0	0	0	0	0	0	0	0	0	0	0	0	0
Otu01039	Bacteria;Bacteroidetes;Bacteroidia;Bacteroidales;Bacteroidaceae;Bacteroides	0	1	0	0	0	0	0	0	0	0	0	0	0	0	1	0	0	0	0	21	0	0	1	1	2	2	0	0	9	0	0	0	0	0	0	0	8	0	0	0	18	0
Otu01040	Bacteria;Firmicutes;Clostridia;Clostridiales;Lachnospiraceae;unclassified_Lachnospiraceae	5	0	1	0	2	0	13	0	5	2	0	0	3	0	0	3	0	1	0	5	4	0	3	0	0	0	0	0	0	1	1	0	2	1	4	0	0	0	0	0	5	3
Otu01041	Bacteria;Firmicutes;Clostridia;Clostridiales;unclassified_Clostridiales;	0	0	0	0	0	6	0	34	0	0	0	0	0	0	1	0	0	0	20	3	0	0	0	0	0	0	0	0	0	0	0	0	0	0	0	0	0	0	0	0	0	0
Otu01042	Bacteria;Bacteroidetes;Bacteroidia;Bacteroidales;unclassified_Bacteroidales;	0	0	0	0	0	0	0	0	0	0	0	0	0	0	0	0	0	0	0	25	0	0	0	0	0	1	0	0	33	0	0	0	0	0	0	0	0	0	0	0	5	0
Otu01043	Bacteria;Proteobacteria;Betaproteobacteria;Burkholderiales;Sutterellaceae;Sutterella	0	0	0	0	0	5	29	0	0	0	0	0	0	0	0	0	0	0	0	1	0	0	0	0	0	0	0	0	0	0	0	0	2	0	0	0	0	0	0	0	22	5
Otu01044	Bacteria;Bacteroidetes;Bacteroidia;Bacteroidales;Prevotellaceae;Prevotella	0	0	0	0	0	0	0	0	0	25	0	0	16	23	0	0	0	0	0	0	0	0	0	0	0	0	0	0	0	0	0	0	0	0	0	0	0	0	0	0	0	0
Otu01045	Bacteria;Bacteroidetes;Bacteroidia;Bacteroidales;unclassified_Bacteroidales;	0	0	4	0	0	0	0	0	0	0	0	0	0	0	1	0	0	1	0	0	7	0	5	8	4	0	1	9	0	0	0	0	0	0	0	9	0	0	0	15	0	0
Otu01046	Bacteria;Firmicutes;Clostridia;Clostridiales;Lachnospiraceae;unclassified_Lachnospiraceae	0	0	0	0	0	0	0	0	35	0	0	0	0	0	1	6	0	20	0	0	0	0	0	0	1	0	0	0	0	0	1	0	0	0	0	0	0	0	0	0	0	0
Otu01047	Bacteria;Firmicutes;Negativicutes;Selenomonadales;unclassified_Selenomonadales;	0	0	0	0	0	0	0	0	0	0	0	0	0	0	0	0	0	0	3	0	0	0	0	8	1	9	0	33	0	0	0	0	0	0	0	0	0	10	0	0	0	0
Otu01048	Bacteria;Bacteroidetes;Bacteroidia;Bacteroidales;Bacteroidaceae;Bacteroides	0	0	0	0	0	11	2	3	0	0	2	0	0	0	0	0	0	0	43	0	0	0	0	0	0	0	0	0	0	0	0	0	1	1	0	0	0	0	0	0	0	0
Otu01049	Bacteria;Bacteroidetes;Bacteroidia;Bacteroidales;Bacteroidaceae;Bacteroides	2	0	0	0	0	2	8	14	1	0	1	0	0	0	0	0	0	0	2	0	0	3	0	0	0	0	0	0	1	10	0	1	3	10	4	0	0	0	0	0	1	0
Otu01050	Bacteria;Firmicutes;Clostridia;Clostridiales;Lachnospiraceae;Fusicatenibacter	8	2	0	0	0	1	4	5	0	0	0	0	0	0	0	1	0	1	0	0	3	0	0	0	0	0	0	0	1	1	0	0	1	12	19	0	0	1	0	0	0	3
Otu01051	Bacteria;Firmicutes;Negativicutes;Selenomonadales;Veillonellaceae;Megasphaera	0	6	0	0	0	0	0	0	0	0	0	0	0	0	0	0	0	0	0	0	0	0	0	0	0	0	0	0	36	0	0	0	0	0	0	0	0	0	0	21	0	0
Otu01052	Bacteria;Firmicutes;Clostridia;Clostridiales;Lachnospiraceae;Dorea	0	0	5	0	1	0	0	0	0	0	0	0	1	0	1	0	2	0	1	1	0	0	1	1	0	0	8	0	2	1	0	0	0	11	0	3	0	1	23	0	0	0
Otu01053	Bacteria;Firmicutes;Clostridia;Clostridiales;Lachnospiraceae;Ruminococcus2	4	0	2	2	1	2	5	1	9	0	0	0	5	1	0	11	0	1	0	4	3	0	2	0	0	0	2	0	3	1	0	0	2	0	1	0	0	0	0	0	1	0
Otu01054	Bacteria;Firmicutes;Clostridia;Clostridiales;Ruminococcaceae;unclassified_Ruminococcaceae	0	0	0	0	0	12	0	1	0	0	47	1	0	0	0	0	0	0	1	0	0	0	0	0	0	0	0	0	0	0	0	0	0	1	0	0	0	0	0	0	0	0
Otu01055	Bacteria;Firmicutes;Clostridia;Clostridiales;Lachnospiraceae;unclassified_Lachnospiraceae	1	0	0	0	0	1	23	7	4	1	0	0	1	0	2	2	0	0	0	1	0	0	0	0	0	0	1	0	2	4	0	0	5	4	4	0	0	0	0	0	0	0
Otu01056	Bacteria;Firmicutes;Clostridia;Clostridiales;Lachnospiraceae;Coprococcus	0	1	0	0	1	0	0	0	25	0	0	0	0	0	0	6	0	7	0	2	0	0	0	0	0	0	0	0	0	0	1	0	0	20	0	0	0	0	0	0	0	0
Otu01057	Bacteria;Firmicutes;Clostridia;Clostridiales;Ruminococcaceae;unclassified_Ruminococcaceae	0	0	0	0	1	13	0	11	0	0	25	0	0	0	4	1	0	0	6	2	0	0	0	0	0	0	0	0	0	0	0	0	0	0	0	0	0	0	0	0	0	0
Otu01058	Bacteria;Firmicutes;Clostridia;Clostridiales;Lachnospiraceae;Blautia	24	0	0	0	1	0	1	0	0	0	0	2	0	6	0	0	1	1	6	1	13	0	0	0	0	0	5	0	0	0	0	0	0	2	0	0	0	0	0	0	0	0
Otu01059	Bacteria;Firmicutes;Clostridia;Clostridiales;unclassified_Clostridiales;	0	0	0	0	5	0	0	2	0	1	0	0	5	14	0	0	36	0	0	0	0	0	0	0	0	0	0	0	0	0	0	0	0	0	0	0	0	0	0	0	0	0
Otu01060	Bacteria;Firmicutes;Erysipelotrichia;Erysipelotrichales;Erysipelotrichaceae;unclassified_Erysipelotrichaceae	0	0	0	0	0	0	0	0	2	3	0	0	0	0	3	5	0	0	0	0	0	0	1	0	0	0	44	0	3	0	0	0	0	0	0	0	0	0	0	1	0	1
Otu01061	Bacteria;Firmicutes;Clostridia;Clostridiales;Ruminococcaceae;unclassified_Ruminococcaceae	0	0	0	0	0	0	0	2	0	0	61	0	0	0	0	0	0	0	0	0	0	0	0	0	0	0	0	0	0	0	0	0	0	0	0	0	0	0	0	0	0	0
Otu01062	Bacteria;Bacteroidetes;Bacteroidia;Bacteroidales;Bacteroidaceae;Bacteroides	0	0	0	0	0	0	0	0	0	0	0	0	0	0	0	0	0	0	0	0	15	0	0	0	0	0	0	0	5	43	0	0	0	0	0	0	0	0	0	0	0	0
Otu01063	Bacteria;Bacteroidetes;Bacteroidia;Bacteroidales;Prevotellaceae;Alloprevotella	0	0	0	0	17	0	0	0	0	0	0	0	1	45	0	0	0	0	0	0	0	0	0	0	0	0	0	0	0	0	0	0	0	0	0	0	0	0	0	0	0	0
Otu01064	Bacteria;Bacteroidetes;Bacteroidia;Bacteroidales;Bacteroidaceae;Bacteroides	0	0	0	0	0	0	0	0	0	0	0	0	0	0	0	0	0	0	0	0	0	62	0	0	0	0	0	0	0	1	0	0	0	0	0	0	0	0	0	0	0	0
Otu01065	Bacteria;Firmicutes;Negativicutes;Selenomonadales;Acidaminococcaceae;Phascolarctobacterium	0	0	5	6	0	0	0	0	1	8	0	0	0	3	10	11	0	2	0	0	15	1	0	0	0	0	0	0	0	0	0	0	1	0	0	0	0	0	0	0	0	0
Otu01066	Bacteria;Bacteroidetes;Bacteroidia;Bacteroidales;Bacteroidaceae;Bacteroides	0	0	0	0	0	0	0	8	0	0	0	54	0	0	0	0	0	0	0	0	0	0	0	0	0	0	0	0	0	0	0	0	0	0	0	0	0	0	0	0	0	0
Otu01067	Bacteria;Verrucomicrobia;Verrucomicrobiae;Verrucomicrobiales;Verrucomicrobiaceae;Akkermansia	0	0	0	0	0	0	0	0	0	0	60	0	0	0	0	0	0	0	0	0	0	0	0	0	0	0	0	0	0	0	0	0	0	0	0	0	2	0	0	0	0	0
Otu01068	Bacteria;Firmicutes;Clostridia;Clostridiales;unclassified_Clostridiales;	0	0	2	0	0	0	0	4	2	1	0	0	17	0	0	1	1	8	0	2	0	0	0	0	0	0	0	0	0	0	0	0	1	4	1	0	0	0	0	0	15	3
Otu01069	Bacteria;Firmicutes;Clostridia;Clostridiales;Lachnospiraceae;Blautia	5	1	0	0	5	0	0	0	1	1	1	2	0	5	0	1	3	0	19	5	0	0	0	1	0	0	0	0	1	0	0	0	2	6	0	0	0	1	1	1	0	0
Otu01070	Bacteria;Firmicutes;Clostridia;Clostridiales;Lachnospiraceae;unclassified_Lachnospiraceae	1	0	0	0	0	0	19	1	0	0	0	0	0	0	2	0	3	0	0	0	5	0	3	1	1	0	0	0	3	5	0	0	0	0	3	0	5	0	0	3	5	2
Otu01071	Bacteria;Firmicutes;Clostridia;Clostridiales;Ruminococcaceae;Ruminococcus	0	1	10	1	0	0	0	2	0	2	0	0	1	1	0	2	0	0	0	14	0	0	0	0	1	0	0	0	1	0	0	0	0	0	10	0	0	2	7	0	0	7
Otu01072	Bacteria;Proteobacteria;Deltaproteobacteria;Desulfovibrionales;Desulfovibrionaceae;Desulfovibrio	0	0	1	0	14	0	0	0	0	0	24	0	0	22	0	0	0	0	0	0	0	0	0	0	0	0	0	0	0	0	0	0	0	0	0	0	1	0	0	0	0	0
Otu01073	Bacteria;Firmicutes;Clostridia;Clostridiales;Lachnospiraceae;unclassified_Lachnospiraceae	0	3	0	0	1	1	0	3	0	1	0	1	0	0	13	21	0	5	0	0	0	0	0	1	1	0	0	0	0	0	4	0	1	0	2	0	0	1	0	0	0	3
Otu01074	Bacteria;Bacteroidetes;Bacteroidia;Bacteroidales;Rikenellaceae;Alistipes	0	0	0	0	0	0	0	0	0	0	0	48	0	0	0	0	0	0	14	0	0	0	0	0	0	0	0	0	0	0	0	0	0	0	0	0	0	0	0	0	0	0
Otu01075	Bacteria;Bacteroidetes;Bacteroidia;Bacteroidales;Prevotellaceae;Prevotella	0	0	8	0	0	0	0	0	0	3	0	0	25	0	0	0	25	0	0	0	0	0	0	0	0	0	1	0	0	0	0	0	0	0	0	0	0	0	0	0	0	0
Otu01076	Bacteria;Firmicutes;Clostridia;Clostridiales;unclassified_Clostridiales;	0	0	0	0	0	10	0	0	0	0	52	0	0	0	0	0	0	0	0	0	0	0	0	0	0	0	0	0	0	0	0	0	0	0	0	0	0	0	0	0	0	0
Otu01077	Bacteria;Firmicutes;Clostridia;Clostridiales;Ruminococcaceae;unclassified_Ruminococcaceae	0	0	0	6	8	0	0	0	1	0	5	0	0	14	2	25	0	1	0	0	0	0	0	0	0	0	0	0	0	0	0	0	0	0	0	0	0	0	0	0	0	0
Otu01078	Bacteria;unclassified_Bacteria;;;;	0	0	0	0	0	0	0	0	0	0	0	0	0	0	0	0	0	0	0	0	0	0	13	7	15	0	0	0	0	0	9	0	0	0	0	6	0	11	0	1	0	0
Otu01079	Bacteria;Bacteroidetes;Bacteroidia;Bacteroidales;Bacteroidaceae;Bacteroides	0	0	0	0	0	0	0	0	0	0	0	0	0	0	0	0	0	0	0	0	0	0	0	0	0	0	0	0	0	0	0	0	0	0	0	0	0	0	0	62	0	0
Otu01080	Bacteria;Bacteroidetes;Bacteroidia;Bacteroidales;Prevotellaceae;unclassified_Prevotellaceae	0	0	0	0	0	0	0	0	0	47	0	0	0	1	2	0	12	0	0	0	0	0	0	0	0	0	0	0	0	0	0	0	0	0	0	0	0	0	0	0	0	0
Otu01081	Bacteria;Actinobacteria;Actinobacteria;Actinomycetales;Actinomycetaceae;Actinomyces	3	0	1	1	2	2	0	1	1	0	3	10	0	1	1	6	3	2	0	0	2	0	2	2	0	0	1	0	7	0	2	2	0	1	1	2	1	0	0	0	1	0
Otu01082	Bacteria;Proteobacteria;Betaproteobacteria;Burkholderiales;Sutterellaceae;Parasutterella	0	0	0	0	0	0	0	0	0	0	0	15	0	0	0	0	0	0	0	0	0	0	0	0	0	1	0	2	9	21	0	13	0	0	0	0	0	0	0	0	0	0
Otu01083	Bacteria;Bacteroidetes;Bacteroidia;Bacteroidales;Bacteroidaceae;Bacteroides	0	0	0	0	0	11	5	10	3	0	0	0	0	0	0	1	0	0	0	0	0	6	0	0	0	0	0	0	0	18	0	4	1	0	1	0	0	0	0	0	1	0
Otu01084	Bacteria;Firmicutes;Clostridia;Clostridiales;Lachnospiraceae;Roseburia	0	0	1	3	4	9	11	2	1	0	0	0	0	0	0	0	1	0	0	1	0	0	1	0	0	0	11	0	2	11	0	0	2	0	0	0	0	0	0	0	0	1
Otu01085	Bacteria;Firmicutes;Clostridia;Clostridiales;Ruminococcaceae;unclassified_Ruminococcaceae	0	2	3	1	0	0	0	4	0	0	0	0	5	2	1	1	2	1	0	12	0	0	0	0	1	0	0	0	1	0	0	0	3	0	7	0	0	5	7	0	0	3
Otu01086	Bacteria;Proteobacteria;Betaproteobacteria;Burkholderiales;Sutterellaceae;Sutterella	0	0	0	0	4	0	0	0	0	0	0	0	0	48	0	9	0	0	0	0	0	0	0	0	0	0	0	0	0	0	0	0	0	0	0	0	0	0	0	0	0	0
Otu01087	Bacteria;Bacteroidetes;Bacteroidia;Bacteroidales;unclassified_Bacteroidales;	0	0	0	0	0	0	0	0	0	0	0	0	0	0	0	0	0	0	0	0	0	0	0	0	0	0	0	0	0	0	0	0	0	0	0	0	0	0	0	61	0	0
Otu01088	Bacteria;Firmicutes;Clostridia;Clostridiales;Ruminococcaceae;unclassified_Ruminococcaceae	0	0	0	0	11	0	0	0	0	31	9	0	0	5	2	3	0	0	0	0	0	0	0	0	0	0	0	0	0	0	0	0	0	0	0	0	0	0	0	0	0	0
Otu01089	Bacteria;Actinobacteria;Actinobacteria;Coriobacteriales;Coriobacteriaceae;Eggerthella	0	0	4	0	0	0	2	0	0	0	5	39	0	0	0	0	0	0	3	0	5	0	0	0	0	0	0	0	0	0	0	1	0	0	1	0	0	0	0	0	0	0
Otu01090	Bacteria;Firmicutes;Clostridia;Clostridiales;Ruminococcaceae;unclassified_Ruminococcaceae	21	0	0	0	0	2	0	0	0	0	0	0	0	0	0	0	0	0	30	0	4	0	0	0	0	0	0	0	0	0	0	0	0	0	3	0	0	0	0	0	0	0
Otu01091	Bacteria;Proteobacteria;Gammaproteobacteria;Enterobacteriales;Enterobacteriaceae;unclassified_Enterobacteriaceae	0	0	0	0	0	0	0	0	0	3	0	9	1	0	0	0	2	0	0	0	2	30	0	4	0	0	0	0	0	0	9	0	0	0	0	0	0	0	0	0	0	0
Otu01092	Bacteria;Firmicutes;Clostridia;Clostridiales;Lachnospiraceae;unclassified_Lachnospiraceae	15	1	0	0	4	1	0	4	4	7	3	1	0	0	0	2	1	0	6	0	8	0	1	0	0	0	0	0	0	0	0	0	1	1	0	0	0	0	0	0	0	0
Otu01093	Bacteria;Firmicutes;Clostridia;Clostridiales;Lachnospiraceae;unclassified_Lachnospiraceae	0	1	3	0	2	13	0	0	2	1	0	0	1	5	1	7	0	1	0	1	0	0	0	0	0	0	1	0	0	0	2	0	1	5	5	0	0	0	0	1	6	1
Otu01094	Bacteria;Synergistetes;Synergistia;Synergistales;Synergistaceae;Cloacibacillus	0	0	0	0	0	0	0	0	0	0	60	0	0	0	0	0	0	0	0	0	0	0	0	0	0	0	0	0	0	0	0	0	0	0	0	0	0	0	0	0	0	0
Otu01095	Bacteria;Firmicutes;Bacilli;Lactobacillales;Streptococcaceae;Streptococcus	0	0	0	0	0	0	0	0	0	0	0	0	0	0	0	0	0	2	0	0	0	0	0	0	0	0	0	0	0	0	0	0	58	0	0	0	0	0	0	0	0	0
Otu01096	Bacteria;unclassified_Bacteria;;;;	0	0	1	11	9	0	0	0	0	3	0	0	0	4	0	0	7	0	0	0	0	0	0	0	0	0	21	0	0	0	0	0	0	0	0	2	0	0	0	0	0	2
Otu01097	Bacteria;Bacteroidetes;Bacteroidia;Bacteroidales;Bacteroidaceae;Bacteroides	0	17	0	0	0	0	0	0	0	0	0	0	0	0	0	0	0	0	0	0	0	0	21	0	0	0	5	0	0	0	0	0	0	0	0	5	0	0	0	0	12	0
Otu01098	Bacteria;Firmicutes;Negativicutes;Selenomonadales;Veillonellaceae;Megamonas	0	0	0	0	0	0	0	0	0	0	0	0	0	0	0	0	2	0	0	0	0	0	56	0	0	0	0	0	0	0	0	0	0	0	0	0	0	2	0	0	0	0
Otu01099	Bacteria;Firmicutes;Clostridia;Clostridiales;unclassified_Clostridiales;	0	0	0	0	0	9	0	0	0	0	51	0	0	0	0	0	0	0	0	0	0	0	0	0	0	0	0	0	0	0	0	0	0	0	0	0	0	0	0	0	0	0
Otu01100	Bacteria;Firmicutes;unclassified_Firmicutes;;;	0	0	0	0	0	0	0	0	0	0	0	0	0	0	0	0	0	0	0	0	0	0	0	0	0	0	0	0	0	0	0	0	59	0	0	0	0	0	0	0	0	0
Otu01101	Bacteria;Bacteroidetes;Bacteroidia;Bacteroidales;Bacteroidaceae;Bacteroides	0	2	0	0	0	0	0	0	0	0	0	0	0	0	0	0	0	0	0	4	0	0	0	0	0	1	0	0	14	0	0	0	0	0	0	0	1	0	0	0	37	0
Otu01102	Bacteria;Firmicutes;Clostridia;Clostridiales;Lachnospiraceae;Roseburia	4	2	2	2	3	1	0	1	10	8	0	0	2	0	2	3	1	0	0	0	0	0	2	0	1	0	0	0	3	0	0	0	0	1	0	0	1	3	0	0	1	6
Otu01103	Bacteria;Firmicutes;Clostridia;Clostridiales;Lachnospiraceae;Lachnospiracea_incertae_sedis	10	2	0	0	2	8	0	5	1	2	0	0	0	2	1	7	1	0	0	2	0	0	0	0	0	0	7	2	0	0	1	0	4	0	1	0	0	0	0	0	0	1
Otu01104	Bacteria;Proteobacteria;Betaproteobacteria;Burkholderiales;Sutterellaceae;Parasutterella	0	0	0	0	0	0	0	0	0	0	0	0	0	0	0	0	0	0	0	0	0	0	3	0	0	6	0	0	47	0	0	0	0	0	0	0	1	0	0	0	2	0
Otu01105	Bacteria;Firmicutes;Clostridia;Clostridiales;Ruminococcaceae;Faecalibacterium	0	0	11	0	1	0	0	0	0	0	0	0	10	0	1	0	6	4	0	0	1	0	1	0	0	0	0	1	0	0	3	0	0	0	0	0	0	2	0	1	0	17
Otu01106	Bacteria;Firmicutes;Clostridia;Clostridiales;Lachnospiraceae;unclassified_Lachnospiraceae	0	0	0	0	28	3	0	0	3	24	0	0	1	0	0	0	0	0	0	0	0	0	0	0	0	0	0	0	0	0	0	0	0	0	0	0	0	0	0	0	0	0
Otu01107	Bacteria;Firmicutes;Clostridia;Clostridiales;unclassified_Clostridiales;	0	0	0	0	3	26	0	2	0	0	24	0	0	0	0	0	0	0	0	4	0	0	0	0	0	0	0	0	0	0	0	0	0	0	0	0	0	0	0	0	0	0
Otu01108	Bacteria;Bacteroidetes;Bacteroidia;Bacteroidales;Prevotellaceae;Prevotella	0	0	0	2	1	0	0	0	26	1	0	0	1	18	0	1	2	0	0	0	0	0	0	0	4	0	0	0	0	0	3	0	0	0	0	0	0	0	0	0	0	0
Otu01109	Bacteria;Firmicutes;Clostridia;Clostridiales;unclassified_Clostridiales;	0	0	0	0	0	34	0	14	0	0	0	0	0	0	6	0	0	0	1	4	0	0	0	0	0	0	0	0	0	0	0	0	0	0	0	0	0	0	0	0	0	0
Otu01110	Bacteria;Firmicutes;Clostridia;Clostridiales;Lachnospiraceae;unclassified_Lachnospiraceae	0	0	0	0	5	0	0	29	0	0	9	0	0	1	1	14	0	0	0	0	0	0	0	0	0	0	0	0	0	0	0	0	0	0	0	0	0	0	0	0	0	0
Otu01111	Bacteria;Proteobacteria;Betaproteobacteria;Burkholderiales;Sutterellaceae;Sutterella	0	0	0	0	11	0	0	0	19	0	0	0	0	8	1	7	0	0	0	0	0	13	0	0	0	0	0	0	0	0	0	0	0	0	0	0	0	0	0	0	0	0
Otu01112	Bacteria;Proteobacteria;unclassified_Proteobacteria;;;	0	0	0	0	0	0	0	0	0	0	0	0	0	0	59	0	0	0	0	0	0	0	0	0	0	0	0	0	0	0	0	0	0	0	0	0	0	0	0	0	0	0
Otu01113	Bacteria;Bacteroidetes;Bacteroidia;Bacteroidales;Bacteroidaceae;Bacteroides	0	1	0	0	0	0	0	0	0	0	0	0	0	0	0	0	0	0	0	23	0	0	0	1	0	11	0	0	17	0	0	0	0	0	0	0	0	0	0	2	4	0
Otu01114	Bacteria;Firmicutes;Clostridia;Clostridiales;Lachnospiraceae;unclassified_Lachnospiraceae	0	0	0	0	0	0	0	8	0	0	0	0	0	0	0	0	0	0	0	0	0	0	0	0	0	0	0	0	0	51	0	0	0	0	0	0	0	0	0	0	0	0
Otu01115	Bacteria;Bacteroidetes;Bacteroidia;Bacteroidales;Prevotellaceae;Prevotella	0	0	0	0	16	0	0	0	0	0	0	0	1	42	0	0	0	0	0	0	0	0	0	0	0	0	0	0	0	0	0	0	0	0	0	0	0	0	0	0	0	0
Otu01116	Bacteria;Firmicutes;Negativicutes;Selenomonadales;Veillonellaceae;Megamonas	0	0	1	0	0	0	0	0	0	0	0	0	0	0	2	2	2	0	0	0	0	0	1	1	1	1	12	7	0	0	0	0	0	9	0	2	0	1	0	17	0	0
Otu01117	Bacteria;Firmicutes;Clostridia;Clostridiales;Lachnospiraceae;unclassified_Lachnospiraceae	0	0	0	0	0	0	0	0	0	0	1	0	0	1	1	1	0	0	0	8	0	0	0	0	0	0	0	0	0	0	0	0	1	31	14	0	0	0	0	0	0	0
Otu01118	Bacteria;Firmicutes;Erysipelotrichia;Erysipelotrichales;Erysipelotrichaceae;unclassified_Erysipelotrichaceae	13	3	0	0	0	4	2	0	1	0	0	2	0	0	1	4	0	0	3	0	2	0	0	0	0	0	0	0	0	0	0	0	0	16	5	0	0	0	0	1	1	0
Otu01119	Bacteria;Firmicutes;unclassified_Firmicutes;;;	0	0	0	0	0	0	0	0	0	0	0	0	1	0	0	0	0	0	57	0	0	0	0	0	0	0	0	0	0	0	0	0	0	0	0	0	0	0	0	0	0	0
Otu01120	Bacteria;Firmicutes;Clostridia;Clostridiales;Lachnospiraceae;unclassified_Lachnospiraceae	0	0	0	0	0	43	0	0	0	0	15	0	0	0	0	0	0	0	0	0	0	0	0	0	0	0	0	0	0	0	0	0	0	0	0	0	0	0	0	0	0	0
Otu01121	Bacteria;Firmicutes;Clostridia;Clostridiales;Lachnospiraceae;Coprococcus	1	0	0	0	2	2	0	4	31	1	0	0	1	0	2	3	0	1	0	1	0	0	0	0	0	0	2	0	1	0	3	0	1	0	2	0	0	0	0	0	0	0
Otu01122	Bacteria;Firmicutes;Negativicutes;Selenomonadales;Veillonellaceae;Megamonas	0	2	3	2	0	0	0	0	0	0	0	0	0	0	1	0	5	0	0	0	0	0	4	3	4	0	7	2	0	0	1	0	0	0	0	8	0	6	10	0	0	0
Otu01123	Bacteria;Firmicutes;Clostridia;Clostridiales;Lachnospiraceae;unclassified_Lachnospiraceae	0	0	0	0	0	0	33	1	0	2	0	0	1	2	3	1	0	0	0	1	0	0	0	0	0	0	1	0	2	4	0	0	1	0	2	0	0	0	0	1	2	1
Otu01124	Bacteria;Firmicutes;Negativicutes;Selenomonadales;Veillonellaceae;Megamonas	0	3	0	0	0	0	0	0	0	0	0	0	0	0	0	0	0	0	0	0	0	0	0	13	15	0	0	0	0	0	0	0	0	0	0	3	0	16	4	4	0	0
Otu01125	Bacteria;Fusobacteria;Fusobacteriia;Fusobacteriales;Fusobacteriaceae;unclassified_Fusobacteriaceae	0	0	0	0	0	0	0	0	0	0	0	0	0	0	0	0	0	0	0	0	0	0	0	4	0	54	0	0	0	0	0	0	0	0	0	0	0	0	0	0	0	0
Otu01126	Bacteria;Bacteroidetes;Bacteroidia;Bacteroidales;Bacteroidaceae;Bacteroides	0	0	0	0	0	0	0	0	0	0	0	0	0	0	1	0	0	0	0	0	0	0	0	1	2	43	0	0	0	0	0	0	0	0	0	0	0	0	2	9	0	0
Otu01127	Bacteria;Bacteroidetes;Bacteroidia;Bacteroidales;unclassified_Bacteroidales;	0	8	0	0	0	0	0	0	0	0	0	0	0	2	2	0	0	1	0	0	5	0	0	0	0	0	0	36	0	0	0	0	0	0	0	0	0	0	1	0	0	3
Otu01128	Bacteria;Bacteroidetes;Bacteroidia;Bacteroidales;unclassified_Bacteroidales;	0	0	0	0	0	0	0	0	0	0	0	0	0	0	0	0	0	0	0	0	0	0	0	0	0	0	0	0	0	0	0	0	0	0	0	0	58	0	0	0	0	0
Otu01129	Bacteria;Bacteroidetes;Bacteroidia;Bacteroidales;Prevotellaceae;Prevotella	0	14	0	6	8	0	0	0	0	4	0	0	1	16	0	5	1	1	0	0	0	0	0	0	0	0	0	0	0	0	0	0	0	0	0	0	0	2	0	0	0	0
Otu01130	Bacteria;Bacteroidetes;Bacteroidia;Bacteroidales;Bacteroidaceae;Bacteroides	0	0	0	0	0	0	0	0	0	0	0	0	0	0	0	0	0	0	0	0	0	0	0	0	0	0	0	0	0	58	0	0	0	0	0	0	0	0	0	0	0	0
Otu01131	Bacteria;Bacteroidetes;Bacteroidia;Bacteroidales;Prevotellaceae;Prevotella	0	2	2	7	1	0	0	0	0	0	0	0	3	2	2	2	0	7	0	0	0	0	5	2	4	0	3	2	0	0	1	0	0	0	0	4	0	3	3	2	0	1
Otu01132	Bacteria;Firmicutes;Clostridia;Clostridiales;Ruminococcaceae;unclassified_Ruminococcaceae	0	1	0	0	0	3	0	1	2	1	1	4	0	2	0	14	0	0	0	1	5	0	0	0	1	0	0	1	0	0	1	0	0	10	2	0	4	0	0	0	1	2
Otu01133	Bacteria;Firmicutes;Clostridia;Clostridiales;Ruminococcaceae;unclassified_Ruminococcaceae	0	0	0	0	0	0	0	0	0	1	52	0	0	0	0	2	0	0	0	0	0	0	0	0	0	0	0	0	0	0	0	0	0	0	0	0	0	0	0	0	0	2
Otu01134	Bacteria;Bacteroidetes;Bacteroidia;Bacteroidales;Bacteroidaceae;Bacteroides	0	0	0	0	0	0	0	0	0	0	0	0	0	0	0	0	0	0	7	1	24	0	0	0	0	3	0	2	17	0	0	0	0	3	0	0	0	0	0	0	0	0
Otu01135	Bacteria;Firmicutes;Erysipelotrichia;Erysipelotrichales;Erysipelotrichaceae;Clostridium XVIII	10	0	1	1	0	3	2	3	1	1	2	0	0	0	2	3	2	1	9	1	6	0	0	0	0	0	2	0	0	3	0	0	0	3	1	0	0	0	0	0	0	0
Otu01136	Bacteria;Proteobacteria;Betaproteobacteria;Burkholderiales;Sutterellaceae;Parasutterella	0	0	0	0	0	0	0	2	0	0	0	0	0	0	0	0	0	0	2	0	0	0	0	0	0	0	0	3	5	4	0	33	0	1	6	0	0	0	0	0	1	0
Otu01137	Bacteria;Firmicutes;Clostridia;Clostridiales;Lachnospiraceae;unclassified_Lachnospiraceae	10	0	1	0	0	5	0	1	7	5	0	0	0	1	3	0	1	3	2	1	7	0	0	0	0	0	1	0	0	0	0	0	3	3	1	0	0	0	0	0	0	2
Otu01138	Bacteria;Bacteroidetes;Bacteroidia;Bacteroidales;Porphyromonadaceae;Butyricimonas	0	0	2	0	0	7	0	13	0	0	0	0	0	0	0	3	0	0	0	2	0	0	0	0	1	1	0	7	5	0	0	0	0	15	0	0	1	0	0	0	0	0
Otu01139	Bacteria;Firmicutes;Clostridia;Clostridiales;Lachnospiraceae;Roseburia	0	0	2	5	2	0	0	0	4	2	0	0	8	1	4	1	2	9	0	0	0	0	0	0	1	0	7	0	0	1	3	0	0	0	0	0	0	0	0	0	0	5
Otu01140	Bacteria;Bacteroidetes;Bacteroidia;Bacteroidales;Bacteroidaceae;Bacteroides	0	0	0	0	0	0	0	0	0	0	0	0	0	0	0	0	0	0	0	0	0	0	13	11	1	0	0	0	0	0	0	0	0	0	0	0	0	0	0	32	0	0
Otu01141	Bacteria;Bacteroidetes;Bacteroidia;Bacteroidales;Prevotellaceae;Paraprevotella	0	1	0	3	0	0	0	0	0	1	0	0	0	0	42	0	0	5	0	0	5	0	0	0	0	0	0	0	0	0	0	0	0	0	0	0	0	0	0	0	0	0
Otu01142	Bacteria;Bacteroidetes;Bacteroidia;Bacteroidales;Bacteroidaceae;Bacteroides	0	0	0	0	0	11	0	0	2	0	0	0	0	0	0	0	0	0	0	0	0	0	0	0	0	0	0	0	1	42	0	0	0	1	0	0	0	0	0	0	0	0
Otu01143	Bacteria;Firmicutes;Clostridia;Clostridiales;Lachnospiraceae;unclassified_Lachnospiraceae	1	0	0	1	2	7	23	2	6	0	0	0	0	1	1	5	0	0	0	1	0	0	0	0	0	0	0	1	0	0	0	0	1	0	5	0	0	0	0	0	0	0
Otu01144	Bacteria;Bacteroidetes;unclassified_Bacteroidetes;;;	0	0	0	0	0	0	0	0	0	0	0	0	6	51	0	0	0	0	0	0	0	0	0	0	0	0	0	0	0	0	0	0	0	0	0	0	0	0	0	0	0	0
Otu01145	Bacteria;unclassified_Bacteria;;;;	0	6	3	5	3	0	0	0	1	3	0	0	2	1	6	7	0	2	0	0	0	0	1	0	1	0	0	2	0	0	7	0	0	0	0	0	0	1	0	4	0	2
Otu01146	Bacteria;Firmicutes;Clostridia;Clostridiales;Lachnospiraceae;unclassified_Lachnospiraceae	0	0	0	0	0	0	0	0	13	0	0	0	0	0	0	8	0	11	0	1	0	0	0	0	0	0	0	0	0	0	3	0	0	21	0	0	0	0	0	0	0	0
Otu01147	Bacteria;Bacteroidetes;Bacteroidia;Bacteroidales;Prevotellaceae;Paraprevotella	0	0	0	0	0	49	2	3	0	0	0	0	0	0	1	0	0	0	0	0	0	0	0	0	0	0	0	0	2	0	0	0	0	0	0	0	0	0	0	0	0	0
Otu01148	Bacteria;Proteobacteria;Betaproteobacteria;Burkholderiales;Oxalobacteraceae;unclassified_Oxalobacteraceae	0	0	0	1	1	2	0	0	0	15	6	0	3	0	1	3	1	0	0	0	0	0	0	0	0	0	0	0	0	0	0	0	0	24	0	0	0	0	0	0	0	0
Otu01149	Bacteria;Actinobacteria;Actinobacteria;Bifidobacteriales;Bifidobacteriaceae;unclassified_Bifidobacteriaceae	0	0	0	0	0	0	0	0	0	0	0	0	0	0	0	0	0	0	0	19	0	0	0	0	0	0	0	0	37	0	0	0	0	0	0	0	0	0	0	0	1	0
Otu01150	Bacteria;Bacteroidetes;Bacteroidia;Bacteroidales;Prevotellaceae;Prevotella	0	4	4	0	2	0	0	0	0	0	0	0	2	0	1	2	0	2	0	0	1	0	7	5	1	0	4	12	0	0	2	0	0	0	0	3	0	1	0	4	0	0
Otu01151	Bacteria;Firmicutes;Clostridia;Clostridiales;Lachnospiraceae;unclassified_Lachnospiraceae	0	0	1	0	0	0	0	5	0	0	0	0	0	0	0	0	0	0	0	0	0	0	0	0	0	0	0	0	0	51	0	0	0	0	0	0	0	0	0	0	0	0
Otu01152	Bacteria;Bacteroidetes;Bacteroidia;Bacteroidales;Bacteroidaceae;Bacteroides	0	2	0	0	0	0	0	0	0	0	0	0	0	0	0	0	0	0	0	17	0	0	0	0	0	1	0	0	12	0	0	0	0	0	0	0	2	0	0	0	22	0
Otu01153	Bacteria;Firmicutes;Clostridia;Clostridiales;Ruminococcaceae;Gemmiger	11	2	5	0	1	1	0	3	1	0	0	0	0	2	4	6	0	0	0	5	7	0	0	0	0	0	1	0	0	0	0	0	0	1	5	0	0	0	0	1	0	0
Otu01154	Bacteria;Fusobacteria;Fusobacteriia;Fusobacteriales;Fusobacteriaceae;unclassified_Fusobacteriaceae	0	0	0	0	3	0	0	0	6	0	0	0	1	0	0	0	0	0	0	0	0	0	0	19	0	1	20	0	0	0	0	4	0	0	0	0	0	0	0	2	0	0
Otu01155	Bacteria;Firmicutes;Clostridia;Clostridiales;Lachnospiraceae;Lachnospiracea_incertae_sedis	0	0	0	0	3	0	0	5	5	1	0	0	1	0	7	3	0	14	0	1	0	0	0	0	0	0	1	0	0	0	0	0	4	0	8	0	0	0	0	0	0	3
Otu01156	Bacteria;Bacteroidetes;Bacteroidia;Bacteroidales;Prevotellaceae;Prevotella	0	0	0	3	6	0	0	0	1	4	0	0	2	1	1	1	5	12	0	0	3	0	0	5	2	0	2	0	0	0	0	0	0	1	0	0	0	0	0	0	0	7
Otu01157	Bacteria;Firmicutes;Clostridia;Clostridiales;unclassified_Clostridiales;	0	0	0	0	0	0	0	0	0	0	0	0	0	0	0	0	0	0	56	0	0	0	0	0	0	0	0	0	0	0	0	0	0	0	0	0	0	0	0	0	0	0
Otu01158	Bacteria;Bacteroidetes;Bacteroidia;Bacteroidales;Bacteroidaceae;Bacteroides	0	0	0	0	0	0	0	0	0	0	0	0	0	0	0	0	0	0	0	0	0	0	0	0	0	14	0	0	0	0	0	0	0	0	0	0	0	0	0	0	42	0
Otu01159	Bacteria;Firmicutes;Clostridia;Clostridiales;Lachnospiraceae;Coprococcus	0	2	1	0	2	0	0	2	6	6	0	0	0	1	4	4	1	0	0	0	17	0	1	0	0	0	2	0	0	2	0	0	0	2	0	0	0	1	0	1	0	0
Otu01160	Bacteria;Firmicutes;Clostridia;Clostridiales;Lachnospiraceae;Blautia	3	1	3	1	2	0	0	2	0	0	1	6	1	5	0	0	2	0	3	1	1	0	0	0	0	0	1	0	1	0	0	0	19	0	1	0	1	0	0	0	0	0
Otu01161	Bacteria;Bacteroidetes;Bacteroidia;Bacteroidales;Bacteroidaceae;Bacteroides	0	0	0	0	0	33	6	8	0	0	0	0	0	0	0	1	0	0	0	0	0	1	0	0	0	0	0	0	0	4	0	1	0	0	1	0	0	0	0	0	0	0
Otu01162	Bacteria;Firmicutes;Clostridia;Clostridiales;Ruminococcaceae;Clostridium IV	0	0	4	0	0	0	0	11	3	0	0	0	0	0	1	0	0	0	0	3	0	0	3	0	6	0	0	0	0	3	2	0	2	0	9	0	8	0	0	0	0	0
Otu01163	Bacteria;Firmicutes;Clostridia;Clostridiales;Lachnospiraceae;Lachnospiracea_incertae_sedis	0	0	3	8	0	0	0	1	1	5	0	0	1	1	13	16	0	1	0	0	0	0	0	0	2	0	0	0	0	0	0	0	0	0	2	0	0	0	0	0	0	1
Otu01164	Bacteria;Firmicutes;Clostridia;Clostridiales;Lachnospiraceae;Roseburia	0	0	0	5	1	0	6	3	24	0	0	0	1	0	2	2	0	0	0	3	0	0	1	0	1	0	0	0	0	0	0	0	0	0	0	0	2	0	0	0	2	2
Otu01165	Bacteria;Firmicutes;Clostridia;Clostridiales;Lachnospiraceae;Lachnospiracea_incertae_sedis	0	1	0	2	14	9	0	2	2	23	0	0	0	1	0	1	0	0	0	0	0	0	0	0	0	0	0	0	0	0	0	0	0	0	0	0	0	0	0	0	0	0
Otu01166	Bacteria;Firmicutes;Clostridia;Clostridiales;Ruminococcaceae;unclassified_Ruminococcaceae	0	0	0	1	5	0	0	0	0	7	34	0	1	2	0	5	0	0	0	0	0	0	0	0	0	0	0	0	0	0	0	0	0	0	0	0	0	0	0	0	0	0
Otu01167	Bacteria;Bacteroidetes;Bacteroidia;Bacteroidales;Prevotellaceae;Paraprevotella	0	0	0	0	0	0	34	10	1	0	0	0	0	0	0	0	0	0	0	0	0	0	0	0	1	0	0	0	0	0	0	9	0	0	0	0	0	0	0	0	0	0
Otu01168	Bacteria;Bacteroidetes;Bacteroidia;Bacteroidales;Prevotellaceae;Prevotella	0	10	0	0	0	0	0	0	0	0	0	0	7	1	0	0	2	0	0	0	0	0	7	1	7	0	0	0	0	0	6	0	0	0	0	6	0	7	0	1	0	0
Otu01169	Bacteria;Bacteroidetes;Bacteroidia;Bacteroidales;Bacteroidaceae;Bacteroides	0	0	0	0	0	0	0	0	0	0	0	0	0	0	0	0	0	0	0	0	0	0	0	0	0	0	0	0	0	55	0	0	0	0	0	0	0	0	0	0	0	0
Otu01170	Bacteria;Firmicutes;Clostridia;Clostridiales;Lachnospiraceae;Lachnospiracea_incertae_sedis	0	0	0	0	15	16	0	5	0	13	0	0	0	0	0	2	4	0	0	0	0	0	0	0	0	0	0	0	0	0	0	0	0	0	0	0	0	0	0	0	0	0
Otu01171	Bacteria;Firmicutes;unclassified_Firmicutes;;;	0	0	0	0	1	0	0	0	0	0	53	0	0	1	0	0	0	0	0	0	0	0	0	0	0	0	0	0	0	0	0	0	0	0	0	0	0	0	0	0	0	0
Otu01172	Bacteria;Firmicutes;Clostridia;Clostridiales;Ruminococcaceae;Oscillibacter	0	0	0	0	0	0	0	0	0	0	0	0	0	0	0	0	0	0	0	0	0	0	0	0	0	0	0	0	4	0	0	0	0	50	0	0	0	1	0	0	0	0
Otu01173	Bacteria;Firmicutes;Clostridia;Clostridiales;unclassified_Clostridiales;	2	0	4	0	0	0	12	1	0	0	0	0	1	0	2	0	0	1	0	0	3	0	0	0	0	0	0	0	1	2	0	0	0	0	8	0	3	0	0	0	11	3
Otu01174	Bacteria;Firmicutes;Clostridia;Clostridiales;Lachnospiraceae;unclassified_Lachnospiraceae	0	0	0	0	1	0	17	4	2	0	0	0	0	0	1	1	0	1	0	0	13	0	0	0	0	0	1	0	0	1	0	0	2	0	10	0	0	0	0	0	0	0
Otu01175	Bacteria;Bacteroidetes;Bacteroidia;Bacteroidales;Porphyromonadaceae;Parabacteroides	0	1	0	0	4	0	0	0	1	2	0	0	0	2	12	6	0	2	0	0	2	0	0	0	2	0	0	13	0	0	0	0	0	0	0	0	0	0	0	0	0	7
Otu01176	Bacteria;Firmicutes;Clostridia;Clostridiales;Lachnospiraceae;unclassified_Lachnospiraceae	0	0	0	0	54	0	0	0	0	0	0	0	0	0	0	0	0	0	0	0	0	0	0	0	0	0	0	0	0	0	0	0	0	0	0	0	0	0	0	0	0	0
Otu01177	Bacteria;Firmicutes;Erysipelotrichia;Erysipelotrichales;Erysipelotrichaceae;Holdemanella	0	0	0	0	0	0	0	0	7	0	6	0	0	0	10	8	1	1	0	0	21	0	0	0	0	0	0	0	0	0	0	0	0	0	0	0	0	0	0	0	0	0
Otu01178	Bacteria;Firmicutes;Negativicutes;Selenomonadales;Veillonellaceae;Megamonas	0	0	0	0	0	0	0	0	0	0	0	0	0	0	0	0	0	0	0	0	0	54	0	0	0	0	0	0	0	0	0	0	0	0	0	0	0	0	0	0	0	0
Otu01179	Bacteria;unclassified_Bacteria;;;;	0	1	2	0	0	0	0	0	0	0	0	0	0	0	0	0	3	0	0	0	0	0	1	3	3	0	4	2	0	0	0	0	0	0	0	18	0	6	6	5	0	0
Otu01180	Bacteria;Firmicutes;Clostridia;Clostridiales;Lachnospiraceae;unclassified_Lachnospiraceae	0	0	0	0	0	2	19	0	0	0	0	0	0	0	0	0	0	0	0	0	0	0	0	0	0	0	0	0	0	27	0	0	2	0	3	0	0	0	1	0	0	0
Otu01181	Bacteria;Firmicutes;Clostridia;Clostridiales;Lachnospiraceae;Lachnospiracea_incertae_sedis	0	0	0	8	5	0	0	0	3	2	0	0	6	2	1	7	4	0	0	2	0	0	0	0	1	0	0	0	0	0	10	0	0	0	0	0	0	3	0	0	0	0
Otu01182	Bacteria;Bacteroidetes;Bacteroidia;Bacteroidales;unclassified_Bacteroidales;	0	0	6	0	1	0	0	0	3	0	0	0	0	0	13	1	0	0	0	0	1	0	1	7	2	0	0	3	0	0	4	0	0	0	0	4	0	0	2	1	0	5
Otu01183	Bacteria;Firmicutes;Clostridia;Clostridiales;Lachnospiraceae;Clostridium XlVa	0	0	1	1	8	0	0	0	0	1	9	9	1	4	1	10	0	0	3	0	0	1	0	0	0	0	0	0	0	0	0	2	0	0	0	0	2	0	0	0	0	0
Otu01184	Bacteria;Bacteroidetes;Bacteroidia;Bacteroidales;Porphyromonadaceae;Parabacteroides	0	0	0	0	0	1	0	1	2	2	0	11	0	0	1	0	0	0	27	0	0	0	0	0	0	0	0	3	0	0	0	0	0	1	1	0	0	0	0	0	0	3
Otu01185	Bacteria;Bacteroidetes;Bacteroidia;Bacteroidales;Bacteroidaceae;Bacteroides	0	0	0	0	0	0	0	0	0	0	0	0	0	0	0	1	0	0	0	32	0	0	0	0	0	0	0	0	6	0	0	0	0	0	0	0	5	0	0	0	9	0
Otu01186	Bacteria;Firmicutes;Clostridia;Clostridiales;Lachnospiraceae;Anaerostipes	1	0	0	0	0	1	3	6	3	0	0	0	0	0	0	1	0	0	0	0	1	0	0	0	0	0	0	0	0	33	0	0	0	0	3	0	0	0	0	0	0	1
Otu01187	Bacteria;Bacteroidetes;Bacteroidia;Bacteroidales;Bacteroidaceae;Bacteroides	0	2	0	0	0	0	0	0	0	0	0	0	0	0	1	0	0	0	0	5	0	0	0	0	0	0	0	0	0	0	0	0	0	0	0	0	1	0	4	38	2	0
Otu01188	Bacteria;Firmicutes;Clostridia;Clostridiales;Lachnospiraceae;Coprococcus	0	0	0	0	0	0	0	1	6	0	0	0	0	0	0	3	2	0	0	3	0	0	0	0	0	0	0	0	0	0	0	0	0	38	0	0	0	0	0	0	0	0
Otu01189	Bacteria;Firmicutes;unclassified_Firmicutes;;;	26	1	0	0	0	0	0	3	0	0	0	0	0	0	0	0	0	0	0	0	9	0	0	0	0	0	0	0	0	0	0	0	0	12	2	0	0	0	0	0	0	0
Otu01190	Bacteria;unclassified_Bacteria;;;;	0	0	0	0	0	0	0	0	0	0	0	0	0	0	0	0	0	0	0	0	0	2	0	0	0	2	0	0	0	0	0	49	0	0	0	0	0	0	0	0	0	0
Otu01191	Bacteria;Firmicutes;Erysipelotrichia;Erysipelotrichales;Erysipelotrichaceae;unclassified_Erysipelotrichaceae	16	0	0	0	0	1	0	0	0	0	0	3	0	0	0	2	0	0	25	0	1	0	0	0	0	0	0	0	0	2	0	0	0	2	0	0	0	0	0	1	0	0
Otu01192	Bacteria;Firmicutes;Clostridia;Clostridiales;Ruminococcaceae;Ruminococcus	0	4	3	2	0	0	0	3	0	3	0	0	2	1	2	5	0	0	0	13	0	0	0	2	1	0	0	0	0	0	0	0	0	0	2	0	0	0	9	0	0	1
Otu01193	Bacteria;Actinobacteria;Actinobacteria;Bifidobacteriales;Bifidobacteriaceae;unclassified_Bifidobacteriaceae	28	0	0	0	0	0	0	0	0	0	0	8	0	0	0	0	0	0	14	0	2	0	0	0	0	0	0	0	0	0	0	0	0	0	1	0	0	0	0	0	0	0
Otu01194	Bacteria;Bacteroidetes;Bacteroidia;Bacteroidales;Prevotellaceae;Prevotella	0	3	3	2	8	0	0	0	0	5	0	0	6	1	5	1	3	3	0	0	1	0	1	2	2	0	3	0	0	0	0	0	0	0	0	1	0	0	2	1	0	0
Otu01195	Bacteria;Proteobacteria;Betaproteobacteria;Burkholderiales;Sutterellaceae;Parasutterella	0	0	0	0	0	0	0	0	0	0	0	11	0	0	0	0	0	0	2	0	0	0	1	0	0	0	0	0	2	26	0	6	0	5	0	0	0	0	0	0	0	0
Otu01196	Bacteria;Bacteroidetes;Bacteroidia;Bacteroidales;Prevotellaceae;Prevotella	0	0	1	0	0	0	0	0	0	0	0	0	0	0	1	0	2	0	0	0	0	0	1	3	4	0	12	4	0	0	0	0	0	0	0	10	0	1	7	7	0	0
Otu01197	Bacteria;Firmicutes;Clostridia;Clostridiales;Ruminococcaceae;unclassified_Ruminococcaceae	0	0	0	0	0	0	0	0	0	1	0	0	0	0	1	42	0	0	0	0	0	0	0	0	0	0	0	0	0	0	0	0	0	9	0	0	0	0	0	0	0	0
Otu01198	Bacteria;Firmicutes;Clostridia;Clostridiales;Ruminococcaceae;Faecalibacterium	0	0	0	0	0	0	0	0	0	0	0	0	0	0	0	0	0	0	0	0	0	0	0	0	0	0	0	0	4	2	3	0	0	27	0	0	7	0	0	0	10	0
Otu01199	Bacteria;Firmicutes;Clostridia;Clostridiales;Lachnospiraceae;unclassified_Lachnospiraceae	9	0	0	0	0	4	3	0	0	0	0	0	0	0	0	0	0	0	0	4	20	0	0	0	1	0	0	0	0	5	0	1	2	0	2	0	0	0	2	0	0	0
Otu01200	Bacteria;Bacteroidetes;Bacteroidia;Bacteroidales;Prevotellaceae;Prevotella	0	0	2	0	0	0	0	0	0	0	0	0	0	0	0	0	0	1	0	0	8	0	4	3	0	0	2	13	0	0	0	0	0	0	0	8	0	0	0	12	0	0
Otu01201	Bacteria;Firmicutes;Clostridia;Clostridiales;Ruminococcaceae;Oscillibacter	0	1	2	0	1	9	0	6	1	0	7	4	0	2	0	2	0	0	11	0	0	0	0	0	0	0	0	0	0	0	0	0	0	6	0	0	0	0	0	0	0	0
Otu01202	Bacteria;Firmicutes;Clostridia;Clostridiales;Ruminococcaceae;unclassified_Ruminococcaceae	0	0	0	0	0	18	0	10	0	0	0	0	0	0	2	0	0	0	17	5	0	0	0	0	0	0	0	0	0	0	0	0	0	0	0	0	0	0	0	0	0	0
Otu01203	Bacteria;unclassified_Bacteria;;;;	2	0	0	0	0	0	8	0	1	0	0	0	0	0	0	0	0	0	0	0	0	0	0	0	0	0	0	0	0	2	0	0	36	1	2	0	0	0	0	0	0	0
Otu01204	Bacteria;Firmicutes;Negativicutes;Selenomonadales;Veillonellaceae;Megamonas	0	1	3	0	0	0	0	0	0	0	0	0	0	0	0	0	2	0	0	0	0	0	0	3	5	0	9	8	0	0	0	0	1	3	0	1	0	6	5	5	0	0
Otu01205	Bacteria;Firmicutes;Clostridia;Clostridiales;Lachnospiraceae;unclassified_Lachnospiraceae	13	0	0	0	0	0	0	0	0	0	0	15	0	0	0	0	0	0	21	1	2	0	0	0	0	0	0	0	0	0	0	0	0	0	0	0	0	0	0	0	0	0
Otu01206	Bacteria;Firmicutes;Clostridia;Clostridiales;Lachnospiraceae;Ruminococcus2	18	0	0	0	1	1	0	0	2	0	0	0	0	0	0	6	0	1	0	0	21	0	0	0	0	0	0	0	0	0	0	0	2	0	0	0	0	0	0	0	0	0
Otu01207	Bacteria;Firmicutes;Clostridia;Clostridiales;Lachnospiraceae;unclassified_Lachnospiraceae	0	0	1	1	1	0	32	0	1	0	0	0	2	0	0	0	1	0	0	3	1	0	1	0	0	0	0	1	0	1	0	0	1	3	0	0	1	0	0	0	0	1
Otu01208	Bacteria;Firmicutes;Clostridia;Clostridiales;Lachnospiraceae;unclassified_Lachnospiraceae	4	0	3	2	2	5	0	3	4	4	0	0	0	1	2	6	0	0	1	2	0	0	0	1	0	0	2	0	2	1	0	0	1	1	3	0	0	0	0	0	1	1
Otu01209	Bacteria;Firmicutes;Negativicutes;Selenomonadales;Veillonellaceae;Megamonas	0	0	0	0	0	0	0	0	0	0	0	0	0	0	0	0	2	0	0	0	0	17	0	20	0	5	4	0	0	0	3	0	0	0	0	0	0	0	0	1	0	0
Otu01210	Bacteria;Firmicutes;Erysipelotrichia;Erysipelotrichales;Erysipelotrichaceae;unclassified_Erysipelotrichaceae	0	0	0	1	4	0	0	0	0	20	2	0	0	2	0	0	6	2	0	15	0	0	0	0	0	0	0	0	0	0	0	0	0	0	0	0	0	0	0	0	0	0
Otu01211	Bacteria;Bacteroidetes;Bacteroidia;Bacteroidales;Prevotellaceae;Prevotella	0	0	0	0	0	0	0	0	0	33	0	0	3	3	0	0	12	0	0	0	0	0	0	0	0	0	0	0	0	0	0	0	0	0	0	0	0	1	0	0	0	0
Otu01212	Bacteria;Bacteroidetes;Bacteroidia;Bacteroidales;Bacteroidaceae;Bacteroides	0	0	0	0	0	0	0	0	0	0	0	0	0	0	0	0	0	0	0	0	0	52	0	0	0	0	0	0	0	0	0	0	0	0	0	0	0	0	0	0	0	0
Otu01213	Bacteria;Firmicutes;Negativicutes;Selenomonadales;Acidaminococcaceae;Phascolarctobacterium	0	0	0	0	0	33	0	0	0	0	0	18	0	0	0	0	0	0	0	0	0	0	0	0	0	0	0	0	0	0	0	0	0	0	0	0	0	0	0	0	0	1
Otu01214	Bacteria;Bacteroidetes;Bacteroidia;Bacteroidales;Bacteroidaceae;Bacteroides	0	0	0	0	0	0	0	0	0	0	0	0	0	0	3	2	0	0	0	0	0	0	0	0	0	0	0	0	0	0	0	0	0	12	0	0	32	0	0	3	0	0
Otu01215	Bacteria;Firmicutes;Negativicutes;Selenomonadales;Veillonellaceae;Megamonas	0	1	0	0	0	0	0	0	0	0	0	0	0	0	0	0	2	0	0	0	0	0	4	7	22	0	0	0	0	0	0	0	0	1	0	5	0	8	0	2	0	0
Otu01216	Bacteria;unclassified_Bacteria;;;;	0	0	0	0	0	0	0	0	0	0	0	0	0	0	0	0	0	0	0	0	0	0	1	2	2	45	0	0	0	0	0	0	0	0	0	0	0	0	0	2	0	0
Otu01217	Bacteria;Firmicutes;Clostridia;Clostridiales;Ruminococcaceae;Gemmiger	0	0	0	0	0	13	0	10	0	0	4	0	0	0	3	2	0	0	16	3	0	0	0	0	0	0	0	0	0	0	0	0	0	0	0	0	0	0	0	0	0	0
Otu01218	Bacteria;Firmicutes;Clostridia;Clostridiales;Lachnospiraceae;unclassified_Lachnospiraceae	0	1	0	1	1	4	0	0	0	0	1	0	0	12	0	16	5	0	0	9	0	0	0	0	0	0	0	0	0	0	1	0	0	0	0	0	0	0	0	0	0	0
Otu01219	Bacteria;Firmicutes;Clostridia;Clostridiales;Lachnospiraceae;Coprococcus	1	1	3	0	1	3	0	10	10	0	0	0	3	0	0	8	0	0	0	2	0	0	1	0	0	0	2	0	0	0	0	0	2	0	2	0	1	0	0	0	0	1
Otu01220	Bacteria;Actinobacteria;Actinobacteria;Bifidobacteriales;Bifidobacteriaceae;unclassified_Bifidobacteriaceae	0	0	0	0	0	19	0	0	0	0	0	0	0	0	0	0	0	0	31	0	0	0	0	0	0	0	0	0	0	0	0	0	1	0	0	0	0	0	0	0	0	0
Otu01221	Bacteria;Firmicutes;Clostridia;Clostridiales;Lachnospiraceae;unclassified_Lachnospiraceae	0	1	0	1	1	0	0	4	12	1	0	0	2	0	3	8	0	9	0	0	0	0	0	1	0	0	0	0	0	0	0	0	5	1	1	0	0	0	0	0	0	1
Otu01222	Bacteria;Firmicutes;Clostridia;Clostridiales;Ruminococcaceae;unclassified_Ruminococcaceae	15	0	0	0	1	6	0	2	0	0	0	0	0	0	0	4	0	0	0	0	21	0	0	0	0	0	0	0	0	0	0	0	0	0	2	0	0	0	0	0	0	0
Otu01223	Bacteria;Firmicutes;Clostridia;Clostridiales;Lachnospiraceae;unclassified_Lachnospiraceae	0	0	0	0	1	0	4	0	0	0	1	0	0	2	2	0	3	0	0	0	7	0	6	0	3	0	2	0	6	6	0	0	1	1	1	0	0	0	0	0	3	2
Otu01224	Bacteria;Firmicutes;Clostridia;Clostridiales;Lachnospiraceae;unclassified_Lachnospiraceae	0	0	0	0	0	2	0	0	0	0	0	49	0	0	0	0	0	0	0	0	0	0	0	0	0	0	0	0	0	0	0	0	0	0	0	0	0	0	0	0	0	0
Otu01225	Bacteria;Firmicutes;Clostridia;Clostridiales;Lachnospiraceae;unclassified_Lachnospiraceae	1	0	0	1	1	4	23	4	2	0	0	0	1	0	0	5	0	0	1	1	0	0	0	0	0	0	2	0	0	2	0	0	1	0	2	0	0	0	0	0	0	0
Otu01226	Bacteria;Bacteroidetes;Bacteroidia;Bacteroidales;Prevotellaceae;Prevotella	0	0	0	0	1	0	0	0	0	20	0	0	3	3	0	2	3	0	0	0	0	0	0	0	0	0	0	0	0	0	1	0	0	0	0	0	0	18	0	0	0	0
Otu01227	Bacteria;Firmicutes;Clostridia;Clostridiales;Ruminococcaceae;Faecalibacterium	0	2	1	0	1	0	0	0	1	0	0	0	3	1	1	0	2	5	0	0	3	0	0	1	1	0	0	2	0	0	0	0	5	1	0	0	0	5	0	1	0	15
Otu01228	Bacteria;Bacteroidetes;Bacteroidia;Bacteroidales;Bacteroidaceae;Bacteroides	0	0	0	0	0	0	0	0	12	0	0	0	0	0	0	3	0	0	0	0	0	0	0	0	0	0	0	0	0	0	0	0	36	0	0	0	0	0	0	0	0	0
Otu01229	Bacteria;Firmicutes;Clostridia;Clostridiales;unclassified_Clostridiales;	0	0	0	0	0	0	0	18	0	0	26	0	0	4	1	2	0	0	0	0	0	0	0	0	0	0	0	0	0	0	0	0	0	0	0	0	0	0	0	0	0	0
Otu01230	Bacteria;Firmicutes;Negativicutes;Selenomonadales;Veillonellaceae;unclassified_Veillonellaceae	0	0	0	0	0	0	0	0	0	0	0	0	0	0	0	0	0	0	0	0	0	0	16	1	0	0	0	0	18	0	0	0	0	11	0	0	0	5	0	0	0	0
Otu01231	Bacteria;Bacteroidetes;Bacteroidia;Bacteroidales;Prevotellaceae;Paraprevotella	0	0	0	0	0	2	16	13	0	0	0	0	0	0	1	0	0	0	0	0	4	0	0	0	1	0	0	0	6	0	0	8	0	0	0	0	0	0	0	0	0	0
Otu01232	Bacteria;Firmicutes;Clostridia;Clostridiales;unclassified_Clostridiales;	2	1	1	0	0	0	3	14	0	1	0	1	0	0	1	0	0	0	0	0	15	0	1	0	0	0	0	3	0	0	0	0	0	1	1	0	2	0	0	0	2	1
Otu01233	Bacteria;Firmicutes;Clostridia;Clostridiales;unclassified_Clostridiales;	0	0	1	0	0	7	0	7	4	7	2	1	2	0	1	0	0	0	10	5	0	0	0	0	0	0	0	0	0	0	0	0	0	3	0	0	0	0	0	0	0	0
Otu01234	Bacteria;Firmicutes;Clostridia;Clostridiales;unclassified_Clostridiales;	0	0	0	0	6	4	0	5	2	4	2	0	1	8	0	9	0	0	0	3	0	0	0	0	0	0	0	0	0	0	1	0	0	3	0	0	0	2	0	0	0	0
Otu01235	Bacteria;Firmicutes;Clostridia;Clostridiales;Lachnospiraceae;unclassified_Lachnospiraceae	0	0	0	0	3	4	0	7	8	0	0	0	0	0	0	0	0	0	1	1	0	0	0	0	0	0	0	0	0	0	2	0	0	20	4	0	0	0	0	0	0	0
Otu01236	Bacteria;Bacteroidetes;Bacteroidia;Bacteroidales;unclassified_Bacteroidales;	7	0	0	0	0	3	0	1	0	0	0	17	0	0	0	0	0	0	18	1	0	0	0	0	0	0	0	0	0	0	0	0	0	2	0	0	0	0	0	0	0	1
Otu01237	Bacteria;Firmicutes;Clostridia;Clostridiales;Lachnospiraceae;unclassified_Lachnospiraceae	5	3	0	0	2	0	0	0	0	3	0	0	0	3	2	1	1	0	1	0	21	0	0	0	1	0	1	1	1	1	0	0	2	0	0	0	0	0	0	1	0	0
Otu01238	Bacteria;Bacteroidetes;Bacteroidia;Bacteroidales;Bacteroidaceae;Bacteroides	14	0	0	0	0	1	10	7	0	0	0	0	0	0	0	1	0	0	2	0	2	1	0	0	0	0	0	0	0	1	0	3	1	1	5	0	0	0	0	0	1	0
Otu01239	Bacteria;Firmicutes;Clostridia;Clostridiales;Lachnospiraceae;Clostridium XlVa	0	1	0	0	0	1	2	24	1	7	1	0	0	1	0	2	0	0	0	0	0	0	0	0	0	0	0	0	0	2	0	2	1	0	1	0	0	1	0	0	3	0
Otu01240	Bacteria;Firmicutes;Clostridia;Clostridiales;Lachnospiraceae;unclassified_Lachnospiraceae	0	0	0	2	0	2	17	1	0	0	0	0	1	1	5	0	0	0	0	1	0	0	0	0	0	0	3	0	0	1	0	3	1	1	6	0	2	0	0	0	0	3
Otu01241	Bacteria;Firmicutes;Clostridia;Clostridiales;Peptostreptococcaceae;Romboutsia	0	0	2	0	0	12	0	1	1	1	4	9	0	4	0	3	1	0	3	0	0	0	0	0	0	0	0	0	0	2	0	3	0	0	2	0	1	0	0	0	0	1
Otu01242	Bacteria;Firmicutes;Clostridia;Clostridiales;Lachnospiraceae;unclassified_Lachnospiraceae	1	0	0	4	0	0	0	1	8	14	0	0	2	0	6	6	2	1	0	3	0	0	0	0	0	0	0	0	0	0	0	0	0	0	2	0	0	0	0	0	0	0
Otu01243	Bacteria;Bacteroidetes;Bacteroidia;Bacteroidales;Prevotellaceae;Prevotella	0	0	3	0	7	0	0	0	1	1	0	0	0	6	5	10	0	1	0	0	10	0	0	1	2	0	0	0	0	0	0	0	0	1	0	0	0	0	0	0	0	2
Otu01244	Bacteria;Fusobacteria;Fusobacteriia;Fusobacteriales;Fusobacteriaceae;unclassified_Fusobacteriaceae	0	0	0	0	0	0	0	0	0	0	0	0	0	0	0	0	0	0	0	0	0	0	0	0	0	0	14	0	0	0	0	0	0	0	0	0	0	0	0	36	0	0
Otu01245	Bacteria;unclassified_Bacteria;;;;	0	0	0	7	5	0	0	0	0	6	0	0	2	0	1	1	9	0	0	0	0	0	0	0	0	0	0	0	0	0	3	0	0	8	0	0	8	0	0	0	0	0
Otu01246	Bacteria;Firmicutes;Negativicutes;Selenomonadales;Veillonellaceae;unclassified_Veillonellaceae	0	0	0	0	0	0	0	0	0	0	0	0	0	0	0	0	0	0	0	0	0	0	50	0	0	0	0	0	0	0	0	0	0	0	0	0	0	0	0	0	0	0
Otu01247	Bacteria;Bacteroidetes;Bacteroidia;Bacteroidales;Prevotellaceae;Prevotella	0	0	2	1	3	0	0	0	0	4	0	0	6	2	0	1	3	5	0	0	0	0	0	2	2	0	5	0	0	0	1	0	0	1	0	0	0	9	1	1	0	1
Otu01248	Bacteria;Firmicutes;Negativicutes;Selenomonadales;Veillonellaceae;Megamonas	0	0	0	0	0	0	0	0	0	0	0	0	0	0	0	0	1	0	0	0	0	0	0	11	0	0	0	0	0	0	0	0	0	0	0	0	0	19	19	0	0	0
Otu01249	Bacteria;Firmicutes;Clostridia;Clostridiales;Eubacteriaceae;Acetobacterium	0	0	0	0	0	0	0	0	0	0	0	0	0	0	0	0	0	0	0	0	0	0	0	1	0	0	0	0	0	0	0	0	0	0	0	0	49	0	0	0	0	0
Otu01250	Bacteria;Bacteroidetes;Bacteroidia;Bacteroidales;Prevotellaceae;Alloprevotella	0	0	0	0	0	0	0	0	0	0	0	0	13	9	18	2	6	0	0	0	0	0	0	0	0	0	0	0	0	0	0	0	0	2	0	0	0	0	0	0	0	0
Otu01251	Bacteria;Firmicutes;Clostridia;Clostridiales;Lachnospiraceae;unclassified_Lachnospiraceae	8	0	0	0	0	20	10	0	0	0	0	0	0	0	0	0	0	0	0	3	0	0	0	0	0	0	0	0	0	3	0	0	0	0	5	0	1	0	0	0	0	0
Otu01252	Bacteria;Firmicutes;Negativicutes;Selenomonadales;Veillonellaceae;unclassified_Veillonellaceae	0	0	0	0	0	0	0	0	0	0	0	0	0	0	0	0	25	0	4	0	0	0	0	3	0	0	0	0	0	0	0	0	0	0	0	0	0	0	18	0	0	0
Otu01253	Bacteria;Firmicutes;Erysipelotrichia;Erysipelotrichales;Erysipelotrichaceae;Clostridium XVIII	0	0	0	0	0	0	0	0	0	0	0	0	0	0	0	0	0	0	0	0	0	48	0	0	0	0	0	0	0	2	0	0	0	0	0	0	0	0	0	0	0	0
Otu01254	Bacteria;Firmicutes;unclassified_Firmicutes;;;	1	8	0	0	0	0	0	0	0	0	0	0	9	0	0	0	1	0	0	2	0	0	2	0	0	0	0	0	1	0	0	0	0	14	0	0	3	3	0	0	5	0
Otu01255	Bacteria;Actinobacteria;Actinobacteria;Bifidobacteriales;Bifidobacteriaceae;Bifidobacterium	0	1	0	0	0	5	0	2	0	0	0	0	1	0	0	0	0	0	6	5	0	0	0	0	0	1	0	0	10	5	0	0	3	2	0	0	0	1	2	1	3	1
Otu01256	Bacteria;Firmicutes;Clostridia;Clostridiales;Ruminococcaceae;unclassified_Ruminococcaceae	12	0	1	1	2	0	0	4	1	1	0	0	1	2	2	5	1	1	0	3	1	0	0	0	0	0	0	0	0	0	0	0	2	1	5	0	0	0	0	0	1	2
Otu01257	Bacteria;Firmicutes;Clostridia;Clostridiales;unclassified_Clostridiales;	0	0	3	0	1	0	0	8	0	2	0	21	1	1	1	6	0	0	0	2	0	0	1	0	0	0	0	0	0	0	0	0	1	0	0	0	0	1	0	0	0	0
Otu01258	Bacteria;Firmicutes;Clostridia;Clostridiales;Eubacteriaceae;Eubacterium	0	0	0	0	0	2	0	0	0	0	34	0	0	1	0	0	0	0	3	0	0	0	0	0	0	0	0	0	0	0	0	0	0	9	0	0	0	0	0	0	0	0
Otu01259	Bacteria;unclassified_Bacteria;;;;	22	0	0	0	0	0	2	3	0	0	0	2	0	0	0	0	0	0	5	0	2	0	0	0	0	0	0	0	0	0	0	1	1	0	10	0	0	0	0	0	1	0
Otu01260	Bacteria;Bacteroidetes;Bacteroidia;Bacteroidales;Bacteroidaceae;Bacteroides	0	0	0	0	0	1	1	0	0	0	0	0	0	0	1	0	0	0	0	3	0	0	0	0	1	3	0	0	25	4	0	0	0	0	2	0	2	0	0	0	6	0
Otu01261	Bacteria;Firmicutes;Negativicutes;Selenomonadales;Acidaminococcaceae;Phascolarctobacterium	0	0	0	0	0	13	1	2	0	0	0	1	0	0	0	0	0	0	4	0	0	0	0	0	0	0	0	3	4	0	0	14	0	0	2	0	0	0	0	0	0	5
Otu01262	Bacteria;Firmicutes;Clostridia;Clostridiales;unclassified_Clostridiales;	0	0	0	0	0	7	0	0	0	0	31	0	0	4	0	7	0	0	0	0	0	0	0	0	0	0	0	0	0	0	0	0	0	0	0	0	0	0	0	0	0	0
Otu01263	Bacteria;Firmicutes;Clostridia;Clostridiales;Lachnospiraceae;Lachnospiracea_incertae_sedis	2	0	0	1	0	2	0	7	12	2	0	0	1	0	3	0	0	1	1	1	0	0	0	0	0	0	1	0	0	0	0	0	9	4	2	0	0	0	0	0	0	0
Otu01264	Bacteria;Firmicutes;Clostridia;Clostridiales;Lachnospiraceae;Lachnospiracea_incertae_sedis	0	0	0	1	0	0	12	8	0	4	1	0	0	1	2	6	0	0	0	0	0	0	0	0	0	0	0	0	0	2	0	0	0	1	0	0	1	0	0	0	10	0
Otu01265	Bacteria;Firmicutes;Clostridia;Clostridiales;unclassified_Clostridiales;	0	0	1	2	1	0	0	1	1	2	0	0	4	0	8	3	0	0	0	14	0	0	0	0	0	0	0	0	0	0	0	0	4	0	5	0	0	0	0	0	0	3
Otu01266	Bacteria;Bacteroidetes;Bacteroidia;Bacteroidales;Bacteroidaceae;Bacteroides	0	0	0	0	0	0	0	0	0	0	0	0	0	0	0	0	0	0	0	6	0	0	0	0	0	0	0	0	43	0	0	0	0	0	0	0	0	0	0	0	0	0
Otu01267	Bacteria;Firmicutes;Bacilli;Lactobacillales;unclassified_Lactobacillales;	0	0	0	0	0	0	0	0	0	0	0	0	0	0	0	0	0	0	0	0	0	0	0	0	0	0	0	0	0	0	0	0	49	0	0	0	0	0	0	0	0	0
Otu01268	Bacteria;Firmicutes;Clostridia;Clostridiales;Lachnospiraceae;unclassified_Lachnospiraceae	0	0	0	1	6	1	0	6	5	0	0	0	0	4	4	18	0	0	0	1	0	0	0	0	0	0	0	0	0	0	0	0	0	3	0	0	0	0	0	0	0	0
Otu01269	Bacteria;Firmicutes;Clostridia;Clostridiales;Lachnospiraceae;unclassified_Lachnospiraceae	5	0	0	0	0	1	21	2	0	0	0	0	0	1	4	0	0	0	0	0	0	0	0	0	1	0	0	0	0	2	0	0	0	0	7	0	0	0	0	0	5	0
Otu01270	Bacteria;unclassified_Bacteria;;;;	0	4	0	1	1	0	0	0	0	1	0	0	3	5	13	4	4	0	0	0	0	0	0	0	0	0	1	0	0	0	0	0	0	0	0	0	0	4	1	0	0	7
Otu01271	Bacteria;Bacteroidetes;Bacteroidia;Bacteroidales;unclassified_Bacteroidales;	0	0	3	0	0	0	0	0	0	0	0	0	0	0	0	0	0	0	0	0	14	0	2	4	1	0	3	13	0	0	0	0	0	0	0	0	0	0	0	9	0	0
Otu01272	Bacteria;Proteobacteria;Betaproteobacteria;Burkholderiales;Sutterellaceae;Parasutterella	0	0	0	0	0	0	0	0	0	0	0	0	0	0	0	0	0	0	0	0	2	0	0	0	0	0	0	0	0	36	0	8	0	0	3	0	0	0	0	0	0	0
Otu01273	Bacteria;Bacteroidetes;Bacteroidia;Bacteroidales;Porphyromonadaceae;Parabacteroides	0	5	0	1	0	0	0	0	0	0	0	0	0	4	0	7	1	0	0	0	0	0	0	2	5	0	0	0	0	0	0	0	0	1	0	0	0	1	0	0	0	22
Otu01274	Bacteria;Bacteroidetes;Bacteroidia;Bacteroidales;Prevotellaceae;Prevotella	0	0	0	0	0	0	0	0	0	15	0	0	14	7	0	0	13	0	0	0	0	0	0	0	0	0	0	0	0	0	0	0	0	0	0	0	0	0	0	0	0	0
Otu01275	Bacteria;Firmicutes;Clostridia;Clostridiales;Lachnospiraceae;unclassified_Lachnospiraceae	0	0	0	0	2	0	0	0	24	0	0	0	1	0	0	0	0	11	0	1	0	0	0	0	0	0	0	0	0	0	0	0	0	10	0	0	0	0	0	0	0	0
Otu01276	Bacteria;Firmicutes;unclassified_Firmicutes;;;	0	1	0	0	0	0	0	0	0	0	0	0	0	0	0	0	0	0	0	0	0	17	0	0	2	16	1	0	0	0	0	0	0	5	0	0	0	0	6	1	0	0
Otu01277	Bacteria;Bacteroidetes;Bacteroidia;Bacteroidales;Bacteroidaceae;Bacteroides	0	0	0	0	0	0	0	0	0	0	0	0	0	0	0	0	0	0	0	9	0	0	3	0	0	10	0	0	22	0	0	0	0	0	0	0	0	0	0	1	4	0
Otu01278	Bacteria;unclassified_Bacteria;;;;	0	0	0	0	0	0	0	0	0	0	0	0	0	0	1	0	0	0	0	0	0	0	0	0	2	37	0	0	0	0	0	0	0	0	0	0	0	0	0	9	0	0
Otu01279	Bacteria;Firmicutes;Bacilli;Lactobacillales;unclassified_Lactobacillales;	0	0	0	0	0	0	0	0	0	0	0	0	0	0	0	0	0	0	0	0	0	0	0	0	0	0	0	0	0	0	0	0	49	0	0	0	0	0	0	0	0	0
Otu01280	Bacteria;Firmicutes;Clostridia;Clostridiales;Ruminococcaceae;unclassified_Ruminococcaceae	5	2	1	0	0	4	0	3	3	0	0	0	1	0	1	1	1	0	0	0	14	0	0	0	0	0	1	0	2	2	0	0	1	6	0	0	0	0	0	0	0	0
Otu01281	Bacteria;Bacteroidetes;Bacteroidia;Bacteroidales;Porphyromonadaceae;Parabacteroides	0	0	1	0	0	6	0	4	4	0	1	0	0	0	1	0	0	0	17	0	2	0	0	0	0	2	0	4	0	0	0	2	0	1	3	0	0	0	0	0	0	0
Otu01282	Bacteria;Firmicutes;Clostridia;Clostridiales;Lachnospiraceae;unclassified_Lachnospiraceae	1	0	0	0	0	0	3	0	0	0	0	0	0	0	0	1	0	0	0	0	20	16	0	0	0	0	1	0	0	0	0	3	0	1	0	0	1	0	1	0	0	0
Otu01283	Bacteria;Proteobacteria;Gammaproteobacteria;Enterobacteriales;Enterobacteriaceae;unclassified_Enterobacteriaceae	0	0	0	0	0	0	0	0	0	8	0	0	1	0	0	0	11	0	0	0	0	0	0	2	0	0	0	0	0	1	22	0	0	1	0	0	2	0	0	0	0	0
Otu01284	Bacteria;Bacteroidetes;Bacteroidia;Bacteroidales;Porphyromonadaceae;unclassified_Porphyromonadaceae	0	0	0	0	0	0	0	0	6	0	0	0	0	0	0	6	0	0	0	0	3	0	0	0	0	0	0	0	0	0	0	0	0	30	0	0	3	0	0	0	0	0
Otu01285	Bacteria;Firmicutes;Clostridia;Clostridiales;Ruminococcaceae;Oscillibacter	0	2	0	0	3	2	0	3	1	15	1	1	0	6	3	6	0	0	1	1	1	0	0	0	0	0	0	0	0	0	0	0	0	1	0	0	0	0	0	0	0	1
Otu01286	Bacteria;Firmicutes;Clostridia;Clostridiales;unclassified_Clostridiales;	0	21	0	2	17	0	0	0	2	0	0	0	1	0	0	4	0	0	0	0	0	0	0	0	0	0	0	0	0	0	1	0	0	0	0	0	0	0	0	0	0	0
Otu01287	Bacteria;Firmicutes;Clostridia;Clostridiales;unclassified_Clostridiales;	0	0	0	0	1	7	0	0	21	1	0	0	0	1	2	14	0	0	0	1	0	0	0	0	0	0	0	0	0	0	0	0	0	0	0	0	0	0	0	0	0	0
Otu01288	Bacteria;Firmicutes;Clostridia;Clostridiales;Lachnospiraceae;unclassified_Lachnospiraceae	0	0	4	0	0	0	0	0	0	1	0	0	6	0	7	7	5	0	1	1	0	0	0	3	6	0	1	0	0	0	1	0	0	0	0	0	0	5	0	0	0	0
Otu01289	Bacteria;unclassified_Bacteria;;;;	0	0	0	0	0	0	0	0	0	0	0	0	0	0	0	0	5	0	0	0	0	0	1	4	0	0	0	0	1	1	35	0	0	0	0	0	0	0	0	0	1	0
Otu01290	Bacteria;Bacteroidetes;Bacteroidia;Bacteroidales;unclassified_Bacteroidales;	37	0	0	0	0	0	2	0	0	0	0	0	0	0	0	0	0	0	0	0	3	0	0	0	0	0	0	0	0	2	0	1	0	0	3	0	0	0	0	0	0	0
Otu01291	Bacteria;Bacteroidetes;Bacteroidia;Bacteroidales;Rikenellaceae;Alistipes	0	0	0	0	0	0	0	0	0	0	2	46	0	0	0	0	0	0	0	0	0	0	0	0	0	0	0	0	0	0	0	0	0	0	0	0	0	0	0	0	0	0
Otu01292	Bacteria;Firmicutes;Clostridia;Clostridiales;Ruminococcaceae;Faecalibacterium	4	0	0	1	0	0	2	0	0	0	0	0	0	0	0	1	0	0	0	1	0	0	0	0	0	0	0	0	0	0	0	0	1	0	7	0	0	0	0	0	21	10
Otu01293	Bacteria;Proteobacteria;Betaproteobacteria;Burkholderiales;Sutterellaceae;Parasutterella	0	0	0	0	0	0	0	0	0	0	0	0	0	0	0	0	0	0	0	0	11	0	0	0	0	0	0	5	31	0	0	0	0	1	0	0	0	0	0	0	0	0
Otu01294	Bacteria;Bacteroidetes;Bacteroidia;Bacteroidales;Prevotellaceae;Prevotella	0	0	4	7	2	0	0	0	1	3	0	0	0	6	1	0	1	2	0	0	2	0	0	1	0	0	0	6	0	0	0	0	0	0	0	0	0	1	2	0	0	9
Otu01295	Bacteria;Bacteroidetes;Bacteroidia;Bacteroidales;Bacteroidaceae;Bacteroides	0	0	0	0	0	0	0	0	0	0	0	0	0	0	0	0	0	0	0	0	0	0	0	11	7	0	0	0	0	0	1	0	0	0	0	0	0	1	5	23	0	0
Otu01296	Bacteria;Bacteroidetes;Bacteroidia;Bacteroidales;Porphyromonadaceae;Parabacteroides	0	0	0	0	0	0	0	0	0	0	0	0	0	0	0	0	0	0	0	0	0	48	0	0	0	0	0	0	0	0	0	0	0	0	0	0	0	0	0	0	0	0
Otu01297	Bacteria;Firmicutes;Clostridia;Clostridiales;unclassified_Clostridiales;	0	0	0	1	4	0	0	0	0	17	2	0	2	4	3	8	2	0	0	1	0	0	0	0	0	0	0	0	0	0	2	0	0	0	0	0	1	1	0	0	0	0
Otu01298	Bacteria;Firmicutes;Clostridia;Clostridiales;Ruminococcaceae;Intestinimonas	0	4	0	0	0	26	0	0	0	0	3	3	0	1	0	0	0	0	6	0	0	0	0	1	0	0	0	0	0	0	0	0	0	3	0	0	0	0	0	0	0	0
Otu01299	Bacteria;Verrucomicrobia;Verrucomicrobiae;Verrucomicrobiales;Verrucomicrobiaceae;Akkermansia	0	1	0	0	0	0	0	0	0	0	46	0	0	0	0	0	0	0	0	0	0	0	0	0	0	0	0	0	0	0	0	0	0	0	0	0	0	0	0	0	0	0
Otu01300	Bacteria;Firmicutes;Clostridia;Clostridiales;Ruminococcaceae;Oscillibacter	0	0	0	0	0	1	0	1	2	0	1	9	0	2	0	0	1	0	7	1	0	0	0	0	0	0	0	0	0	1	0	0	0	21	0	0	0	0	0	0	0	0
Otu01301	Bacteria;Firmicutes;Clostridia;Clostridiales;unclassified_Clostridiales;	0	0	0	0	1	0	0	8	2	0	0	0	0	0	1	11	0	2	0	0	0	0	0	0	0	0	0	0	0	0	0	0	3	1	16	0	0	0	0	0	0	2
Otu01302	Bacteria;Firmicutes;Clostridia;Clostridiales;Ruminococcaceae;unclassified_Ruminococcaceae	0	0	0	0	0	0	0	0	1	2	1	1	1	4	0	2	0	0	2	2	0	14	0	0	0	0	0	2	2	1	1	0	0	4	0	0	0	0	1	0	1	5
Otu01303	Bacteria;Firmicutes;Clostridia;Clostridiales;Lachnospiraceae;Ruminococcus2	2	0	1	0	0	2	1	0	3	0	4	0	0	0	0	1	0	0	12	2	4	1	0	0	0	0	0	0	5	1	0	0	0	1	0	0	0	0	0	0	7	0
Otu01304	Bacteria;Firmicutes;Clostridia;Clostridiales;Ruminococcaceae;unclassified_Ruminococcaceae	0	0	1	1	1	0	0	10	2	7	3	0	2	2	0	3	2	1	1	3	0	0	0	0	0	0	0	0	0	0	0	0	0	8	0	0	0	0	0	0	0	0
Otu01305	Bacteria;Firmicutes;Clostridia;Clostridiales;unclassified_Clostridiales;	0	0	2	2	1	4	0	4	0	4	3	6	1	7	0	9	0	2	0	1	0	0	0	0	1	0	0	0	0	0	0	0	0	0	0	0	0	0	0	0	0	0
Otu01306	Bacteria;Firmicutes;Negativicutes;Selenomonadales;Veillonellaceae;Megamonas	0	47	0	0	0	0	0	0	0	0	0	0	0	0	0	0	0	0	0	0	0	0	0	0	0	0	0	0	0	0	0	0	0	0	0	0	0	0	0	0	0	0
Otu01307	Bacteria;Firmicutes;Clostridia;Clostridiales;Lachnospiraceae;unclassified_Lachnospiraceae	1	0	0	3	3	0	0	1	0	2	0	0	1	2	1	1	1	4	1	0	2	0	0	0	0	0	0	0	0	0	1	1	2	1	2	0	0	1	0	0	12	4
Otu01308	Bacteria;Firmicutes;Clostridia;Clostridiales;Lachnospiraceae;unclassified_Lachnospiraceae	0	0	0	0	5	0	0	1	1	2	0	0	0	26	0	12	0	0	0	0	0	0	0	0	0	0	0	0	0	0	0	0	0	0	0	0	0	0	0	0	0	0
Otu01309	Bacteria;Firmicutes;Clostridia;Clostridiales;unclassified_Clostridiales;	0	0	0	0	0	0	0	3	0	1	41	0	0	0	0	1	0	0	0	0	0	0	0	0	0	0	0	0	0	0	0	0	1	0	0	0	0	0	0	0	0	0
Otu01310	Bacteria;Firmicutes;Clostridia;Clostridiales;Lachnospiraceae;Lachnospiracea_incertae_sedis	0	1	0	3	9	0	0	2	4	20	0	0	0	0	0	5	1	0	0	0	0	0	0	0	1	0	0	0	0	0	1	0	0	0	0	0	0	0	0	0	0	0
Otu01311	Bacteria;Proteobacteria;Betaproteobacteria;Burkholderiales;Sutterellaceae;Parasutterella	0	0	0	0	0	0	0	0	0	0	0	0	0	0	0	0	0	0	0	0	0	0	0	0	0	0	0	0	0	40	0	0	0	3	0	0	0	0	4	0	0	0
Otu01312	Bacteria;Bacteroidetes;Bacteroidia;Bacteroidales;unclassified_Bacteroidales;	0	0	0	0	0	0	0	0	0	0	0	0	0	0	0	0	0	0	0	0	0	0	0	0	0	0	0	0	0	0	0	0	0	0	0	0	47	0	0	0	0	0
Otu01313	Bacteria;Bacteroidetes;Bacteroidia;Bacteroidales;unclassified_Bacteroidales;	0	0	0	0	0	0	0	0	0	0	0	0	1	0	4	7	0	0	0	0	0	0	0	0	0	0	0	0	0	0	0	0	0	35	0	0	0	0	0	0	0	0
Otu01314	Bacteria;Firmicutes;Clostridia;Clostridiales;Lachnospiraceae;unclassified_Lachnospiraceae	13	1	0	0	0	4	10	0	0	0	0	0	0	0	0	1	0	0	0	1	0	0	0	0	0	0	0	3	1	0	0	0	0	0	7	0	1	0	0	3	1	1
Otu01315	Bacteria;Firmicutes;Clostridia;Clostridiales;Lachnospiraceae;unclassified_Lachnospiraceae	0	0	0	0	2	0	0	0	0	0	0	0	0	40	1	1	0	0	0	0	0	0	0	0	1	0	0	0	0	0	2	0	0	0	0	0	0	0	0	0	0	0
Otu01316	Bacteria;Firmicutes;Clostridia;Clostridiales;Lachnospiraceae;Coprococcus	0	0	0	0	13	0	0	0	0	3	13	0	0	4	0	0	0	0	0	0	0	0	0	0	0	0	0	0	0	0	0	0	13	0	0	0	0	1	0	0	0	0
Otu01317	Bacteria;unclassified_Bacteria;;;;	0	0	1	0	0	0	0	0	0	0	0	0	0	0	0	0	3	0	0	0	0	0	0	1	0	0	11	5	0	0	0	0	0	0	0	17	0	0	2	7	0	0
Otu01318	Bacteria;Bacteroidetes;Bacteroidia;Bacteroidales;Prevotellaceae;Alloprevotella	0	0	0	0	0	0	0	0	0	0	0	0	0	0	0	0	0	0	0	0	0	0	0	0	0	0	0	0	0	0	0	0	0	0	0	0	47	0	0	0	0	0
Otu01319	Bacteria;Bacteroidetes;Bacteroidia;Bacteroidales;Rikenellaceae;Alistipes	0	0	0	0	2	1	0	15	3	1	10	5	0	0	0	6	0	0	0	0	0	0	0	0	0	0	0	0	0	0	0	0	0	2	0	0	0	1	0	0	0	0
Otu01320	Bacteria;Firmicutes;Negativicutes;Selenomonadales;Veillonellaceae;Dialister	0	11	0	0	0	0	0	0	0	0	0	0	0	0	0	0	3	0	0	1	0	0	0	0	0	0	0	0	3	2	0	0	0	26	0	0	0	0	0	0	0	0
Otu01321	Bacteria;Firmicutes;Clostridia;Clostridiales;Ruminococcaceae;Faecalibacterium	5	1	3	0	0	0	0	4	0	0	0	0	1	0	1	1	0	1	0	2	2	0	0	0	1	0	0	6	0	0	0	0	1	2	5	0	0	0	0	0	5	5
Otu01322	Bacteria;Firmicutes;Clostridia;Clostridiales;Lachnospiraceae;Clostridium XlVa	0	0	1	1	2	9	0	3	0	0	7	6	1	2	3	3	0	0	4	0	1	0	0	0	0	0	0	0	0	0	0	0	1	2	0	0	0	0	0	0	0	0
Otu01323	Bacteria;Bacteroidetes;Bacteroidia;Bacteroidales;Porphyromonadaceae;Parabacteroides	1	0	0	0	0	0	1	0	0	0	5	23	0	0	0	3	0	0	0	1	0	0	0	0	0	0	0	0	0	0	0	0	0	3	8	0	0	0	0	0	1	0
Otu01324	Bacteria;Firmicutes;Clostridia;Clostridiales;Lachnospiraceae;Roseburia	1	0	0	0	0	0	0	1	4	2	0	0	0	0	1	0	1	1	0	0	0	0	0	0	0	0	0	0	1	1	0	0	30	1	2	0	0	0	0	0	0	0
Otu01325	Bacteria;Firmicutes;Clostridia;Clostridiales;unclassified_Clostridiales;	1	0	0	0	0	6	0	4	2	2	0	0	0	3	1	26	0	0	1	0	0	0	0	0	0	0	0	0	0	0	0	0	0	0	0	0	0	0	0	0	0	0
Otu01326	Bacteria;Bacteroidetes;Bacteroidia;Bacteroidales;Prevotellaceae;Prevotella	0	0	1	2	2	0	0	0	0	1	0	0	0	0	0	0	0	1	0	0	6	0	1	10	2	0	3	6	0	0	0	0	0	0	0	4	0	0	3	4	0	0
Otu01327	Bacteria;Firmicutes;Clostridia;Clostridiales;Lachnospiraceae;unclassified_Lachnospiraceae	0	0	0	0	0	4	1	6	8	0	0	0	1	1	2	2	0	1	0	4	0	0	0	1	0	0	0	2	0	0	0	0	9	2	2	0	0	0	0	0	0	0
Otu01328	Bacteria;Firmicutes;Clostridia;Clostridiales;Lachnospiraceae;unclassified_Lachnospiraceae	0	0	0	0	0	0	0	1	15	9	0	0	1	0	0	1	0	0	0	2	0	0	2	0	0	0	0	0	1	0	0	0	1	2	3	0	1	0	0	0	0	7
Otu01329	Bacteria;Bacteroidetes;Bacteroidia;Bacteroidales;Bacteroidaceae;Bacteroides	0	14	0	0	0	0	0	0	0	0	0	0	0	0	1	0	0	0	0	0	0	0	21	0	6	0	0	0	0	0	0	0	0	0	0	0	0	0	0	4	0	0
Otu01330	Bacteria;Bacteroidetes;Bacteroidia;Bacteroidales;Rikenellaceae;Alistipes	0	0	0	0	0	1	0	0	0	0	0	45	0	0	0	0	0	0	0	0	0	0	0	0	0	0	0	0	0	0	0	0	0	0	0	0	0	0	0	0	0	0
Otu01331	Bacteria;Bacteroidetes;Bacteroidia;Bacteroidales;unclassified_Bacteroidales;	0	0	0	0	0	0	0	0	0	0	0	0	0	0	0	0	0	0	0	0	0	0	11	4	3	0	0	0	0	0	0	0	0	0	0	0	0	0	0	28	0	0
Otu01332	Bacteria;Bacteroidetes;Bacteroidia;Bacteroidales;Prevotellaceae;Prevotella	0	0	0	9	3	0	0	0	0	8	0	0	5	0	19	0	2	0	0	0	0	0	0	0	0	0	0	0	0	0	0	0	0	0	0	0	0	0	0	0	0	0
Otu01333	Bacteria;Bacteroidetes;Bacteroidia;Bacteroidales;Bacteroidaceae;Bacteroides	0	0	0	0	0	0	0	0	0	0	0	0	0	0	0	0	0	0	0	0	15	0	5	9	0	0	0	10	0	0	0	0	0	1	0	1	0	0	0	5	0	0
Otu01334	Bacteria;Firmicutes;Clostridia;Clostridiales;Lachnospiraceae;unclassified_Lachnospiraceae	0	0	0	0	46	0	0	0	0	0	0	0	0	0	0	0	0	0	0	0	0	0	0	0	0	0	0	0	0	0	0	0	0	0	0	0	0	0	0	0	0	0
Otu01335	Bacteria;Firmicutes;Clostridia;Clostridiales;Lachnospiraceae;unclassified_Lachnospiraceae	0	3	2	0	0	3	8	4	0	4	0	0	3	2	1	1	0	2	0	1	0	0	1	0	0	0	0	0	0	1	0	0	2	0	3	0	1	0	0	0	4	0
Otu01336	Bacteria;Firmicutes;Clostridia;Clostridiales;Lachnospiraceae;unclassified_Lachnospiraceae	2	2	0	0	2	3	0	0	6	0	0	0	0	3	2	3	0	0	0	2	0	0	3	0	2	0	5	0	2	0	0	0	4	0	4	0	0	0	0	1	0	0
Otu01337	Bacteria;Firmicutes;Negativicutes;Selenomonadales;Veillonellaceae;Megamonas	0	0	0	0	0	0	0	0	0	0	0	0	0	0	0	0	46	0	0	0	0	0	0	0	0	0	0	0	0	0	0	0	0	0	0	0	0	0	0	0	0	0
Otu01338	Bacteria;unclassified_Bacteria;;;;	0	0	0	0	0	0	26	0	1	0	0	0	0	0	0	0	0	0	0	0	0	0	0	0	0	0	0	0	0	5	0	0	5	1	7	0	1	0	0	0	0	0
Otu01339	Bacteria;Bacteroidetes;Bacteroidia;Bacteroidales;Prevotellaceae;Prevotella	0	3	5	1	0	0	0	0	0	2	0	0	11	2	3	2	3	4	0	0	0	0	0	0	2	0	0	0	0	0	1	0	0	0	0	0	0	0	6	0	0	1
Otu01340	Bacteria;unclassified_Bacteria;;;;	0	1	0	0	15	0	0	0	0	14	0	0	0	2	0	1	0	6	0	0	0	0	0	0	0	0	0	0	0	0	6	0	0	0	0	0	0	1	0	0	0	0
Otu01341	Bacteria;Firmicutes;Clostridia;Clostridiales;Lachnospiraceae;unclassified_Lachnospiraceae	0	1	1	2	1	0	0	6	3	2	1	0	0	0	2	4	0	7	0	0	0	0	0	1	1	0	3	0	0	0	1	0	5	0	4	0	0	0	0	0	0	1
Otu01342	Bacteria;Bacteroidetes;Bacteroidia;Bacteroidales;Porphyromonadaceae;Parabacteroides	0	0	1	0	0	0	0	0	0	2	0	0	0	1	14	0	0	0	0	0	3	0	0	0	0	0	0	10	0	0	1	0	0	1	0	0	0	0	1	0	0	12
Otu01343	Bacteria;Firmicutes;Clostridia;Clostridiales;unclassified_Clostridiales;	0	0	0	1	0	1	0	0	0	4	3	0	2	11	0	0	0	0	0	8	0	0	0	0	3	0	0	0	0	0	0	0	2	3	6	0	0	0	1	0	0	0
Otu01344	Bacteria;Firmicutes;Clostridia;Clostridiales;Ruminococcaceae;unclassified_Ruminococcaceae	0	0	0	0	0	4	0	14	1	0	0	0	0	0	2	0	0	0	4	14	0	0	0	0	0	0	0	0	0	0	0	0	0	1	4	0	0	0	1	0	0	0
Otu01345	Bacteria;Bacteroidetes;Bacteroidia;Bacteroidales;Bacteroidaceae;Bacteroides	1	0	0	0	0	0	0	2	0	0	5	13	0	0	0	4	0	0	0	0	0	0	0	0	0	0	0	0	0	0	0	18	0	0	2	0	0	0	0	0	0	0
Otu01346	Bacteria;Firmicutes;Clostridia;Clostridiales;Ruminococcaceae;unclassified_Ruminococcaceae	0	0	0	0	2	8	0	0	2	1	6	1	4	2	0	15	0	0	3	0	0	0	0	0	0	0	0	0	0	0	0	0	0	0	0	0	0	1	0	0	0	0
Otu01347	Bacteria;Firmicutes;Clostridia;Clostridiales;Lachnospiraceae;Blautia	2	1	1	0	2	3	0	1	2	1	0	7	0	13	0	7	0	0	4	0	0	0	0	0	0	0	0	0	0	0	0	0	0	1	0	0	0	0	0	0	0	0
Otu01348	Bacteria;Firmicutes;Clostridia;Clostridiales;Lachnospiraceae;unclassified_Lachnospiraceae	0	0	1	0	0	4	0	3	0	0	0	0	0	0	0	0	0	0	5	6	0	0	0	0	0	0	0	0	5	1	0	0	10	1	8	0	0	0	0	1	0	0
Otu01349	Bacteria;Firmicutes;Clostridia;Clostridiales;Lachnospiraceae;Blautia	8	3	0	0	0	0	2	0	0	0	0	4	0	3	2	0	0	0	0	2	10	0	0	0	0	0	0	0	1	0	0	2	0	1	0	1	3	0	0	0	1	2
Otu01350	Bacteria;Firmicutes;Clostridia;Clostridiales;Ruminococcaceae;unclassified_Ruminococcaceae	11	0	0	2	0	0	0	4	0	0	0	0	0	0	3	6	0	0	4	0	3	0	0	0	0	0	1	0	1	2	0	0	2	1	5	0	0	0	0	0	0	0
Otu01351	Bacteria;Firmicutes;Clostridia;Clostridiales;unclassified_Clostridiales;	0	0	2	0	0	0	1	0	0	0	0	0	0	1	0	0	0	0	0	1	0	0	0	0	0	0	0	0	0	0	0	0	0	1	4	0	0	0	0	0	32	3
Otu01352	Bacteria;Firmicutes;Clostridia;Clostridiales;Lachnospiraceae;Fusicatenibacter	4	0	0	2	1	0	4	2	0	0	0	0	0	0	0	0	0	0	0	1	1	0	1	0	0	0	0	0	0	0	0	0	1	7	19	0	0	0	0	2	0	0
Otu01353	Bacteria;Bacteroidetes;Bacteroidia;Bacteroidales;unclassified_Bacteroidales;	0	0	0	0	0	1	8	0	0	0	0	0	0	0	0	1	0	0	0	0	0	0	0	0	0	0	0	0	0	0	0	3	0	2	30	0	0	0	0	0	0	0
Otu01354	Bacteria;Firmicutes;Clostridia;Clostridiales;Lachnospiraceae;unclassified_Lachnospiraceae	2	2	0	0	3	1	0	7	4	6	0	2	0	1	0	1	0	0	0	1	1	0	0	0	0	0	0	0	1	0	0	0	1	9	1	0	0	1	1	0	0	0
Otu01355	Bacteria;Firmicutes;Clostridia;Clostridiales;Lachnospiraceae;Blautia	0	0	0	0	0	0	0	0	0	0	0	0	0	0	0	0	0	0	0	0	0	45	0	0	0	0	0	0	0	0	0	0	0	0	0	0	0	0	0	0	0	0
Otu01356	Bacteria;Firmicutes;Clostridia;Clostridiales;Ruminococcaceae;unclassified_Ruminococcaceae	0	0	0	0	2	8	0	1	1	4	3	3	0	5	0	13	0	0	4	0	0	0	0	0	0	0	0	0	0	0	0	0	1	0	0	0	0	0	0	0	0	0
Otu01357	Bacteria;unclassified_Bacteria;;;;	0	0	0	0	0	7	0	0	0	0	0	31	0	0	0	0	0	0	7	0	0	0	0	0	0	0	0	0	0	0	0	0	0	0	0	0	0	0	0	0	0	0
Otu01358	Bacteria;Firmicutes;Clostridia;Clostridiales;Lachnospiraceae;unclassified_Lachnospiraceae	10	0	2	0	0	3	2	2	3	0	0	0	0	0	1	0	0	2	0	5	0	0	0	0	0	0	0	0	0	0	0	0	3	0	8	0	0	0	0	0	4	0
Otu01359	Bacteria;Bacteroidetes;Bacteroidia;Bacteroidales;Bacteroidaceae;Bacteroides	0	0	0	0	0	0	0	0	0	0	0	0	0	0	0	0	0	0	0	0	0	45	0	0	0	0	0	0	0	0	0	0	0	0	0	0	0	0	0	0	0	0
Otu01360	Bacteria;Firmicutes;Clostridia;Clostridiales;Ruminococcaceae;unclassified_Ruminococcaceae	0	0	5	0	2	0	0	0	2	0	0	0	22	0	0	0	2	12	0	0	0	0	0	0	0	0	0	0	0	0	0	0	0	0	0	0	0	0	0	0	0	0
Otu01361	Bacteria;Bacteroidetes;Bacteroidia;Bacteroidales;unclassified_Bacteroidales;	0	0	0	0	0	0	0	0	0	0	0	0	0	0	2	0	0	0	0	0	0	0	0	0	0	0	0	0	0	0	2	0	0	0	0	0	41	0	0	0	0	0
Otu01362	Bacteria;Proteobacteria;Betaproteobacteria;Burkholderiales;Sutterellaceae;Sutterella	0	0	0	0	2	0	0	0	0	0	0	0	0	37	0	6	0	0	0	0	0	0	0	0	0	0	0	0	0	0	0	0	0	0	0	0	0	0	0	0	0	0
Otu01363	Bacteria;Firmicutes;Clostridia;Clostridiales;Lachnospiraceae;unclassified_Lachnospiraceae	16	1	1	0	0	2	4	2	6	0	0	0	0	0	0	2	0	1	1	2	1	0	0	0	0	0	4	0	2	0	0	0	0	0	0	0	0	0	0	0	0	0
Otu01364	Bacteria;Bacteroidetes;Bacteroidia;Bacteroidales;unclassified_Bacteroidales;	0	0	0	0	0	0	0	0	0	0	0	0	0	0	0	0	0	0	0	44	0	0	0	0	1	0	0	0	0	0	0	0	0	0	0	0	0	0	0	0	0	0
Otu01365	Bacteria;Firmicutes;Negativicutes;Selenomonadales;Acidaminococcaceae;Phascolarctobacterium	0	0	19	2	0	0	0	0	0	0	0	0	0	0	7	7	5	0	0	0	0	0	0	0	0	0	0	0	0	0	0	0	0	0	0	0	0	0	5	0	0	0
Otu01366	Bacteria;Firmicutes;Clostridia;Clostridiales;Lachnospiraceae;unclassified_Lachnospiraceae	0	0	5	0	0	0	0	0	0	0	0	0	0	0	0	0	34	0	0	0	0	0	0	0	0	0	0	0	0	0	0	0	0	4	0	0	0	0	2	0	0	0
Otu01367	Bacteria;Firmicutes;Clostridia;Clostridiales;Lachnospiraceae;unclassified_Lachnospiraceae	6	2	0	0	13	1	0	17	0	0	0	0	0	0	5	0	0	0	1	0	0	0	0	0	0	0	0	0	0	0	0	0	0	0	0	0	0	0	0	0	0	0
Otu01368	Bacteria;Proteobacteria;Gammaproteobacteria;Pseudomonadales;Pseudomonadaceae;Pseudomonas	0	0	0	0	0	0	0	0	0	0	0	0	0	0	0	0	0	0	0	0	0	0	1	0	0	0	0	0	0	0	0	0	0	0	0	0	44	0	0	0	0	0
Otu01369	Bacteria;Proteobacteria;Alphaproteobacteria;Rhodospirillales;unclassified_Rhodospirillales;	0	0	0	0	0	0	0	0	0	0	45	0	0	0	0	0	0	0	0	0	0	0	0	0	0	0	0	0	0	0	0	0	0	0	0	0	0	0	0	0	0	0
Otu01370	Bacteria;Firmicutes;Negativicutes;Selenomonadales;Veillonellaceae;Megamonas	0	1	0	0	0	0	0	0	0	0	0	0	0	0	0	0	0	0	0	0	0	5	0	3	1	24	3	1	0	0	0	0	0	0	0	3	0	0	4	0	0	0
Otu01371	Bacteria;Actinobacteria;Actinobacteria;Bifidobacteriales;Bifidobacteriaceae;unclassified_Bifidobacteriaceae	0	0	0	0	0	0	0	0	0	0	0	44	0	0	0	0	0	0	0	0	0	0	0	0	0	0	0	0	0	0	0	0	0	0	0	0	0	0	0	0	0	0
Otu01372	Bacteria;Bacteroidetes;Bacteroidia;Bacteroidales;Bacteroidaceae;Bacteroides	0	0	0	0	0	27	1	3	0	0	0	0	0	0	0	1	0	0	0	0	0	0	0	0	0	0	0	0	1	6	0	3	0	0	2	0	0	0	0	0	0	0
Otu01373	Bacteria;Firmicutes;Clostridia;Clostridiales;unclassified_Clostridiales;	0	0	0	0	0	0	0	0	0	0	0	42	0	0	0	0	0	0	2	0	0	0	0	0	0	0	0	0	0	0	0	0	0	0	0	0	0	0	0	0	0	0
Otu01374	Bacteria;Firmicutes;Clostridia;Clostridiales;Lachnospiraceae;Roseburia	0	0	0	0	0	0	9	2	0	0	0	0	0	0	0	0	0	0	0	0	0	0	0	0	0	0	0	0	5	17	0	0	4	3	2	0	2	0	0	0	0	0
Otu01375	Bacteria;Bacteroidetes;Bacteroidia;Bacteroidales;Bacteroidaceae;Bacteroides	0	0	0	0	0	10	2	1	1	0	0	0	0	0	0	0	0	0	0	0	0	1	0	0	0	0	0	0	1	22	0	4	0	0	1	0	0	0	0	0	1	0
Otu01376	Bacteria;Firmicutes;Clostridia;Clostridiales;Lachnospiraceae;Roseburia	0	0	0	0	0	0	2	0	0	0	0	0	2	1	1	1	0	2	0	3	0	0	0	0	0	0	1	0	0	1	0	0	29	0	1	0	0	0	0	0	0	0
Otu01377	Bacteria;Proteobacteria;Betaproteobacteria;Burkholderiales;Sutterellaceae;Sutterella	0	0	0	0	0	0	0	0	0	0	0	0	0	0	0	0	0	0	0	0	0	0	0	0	0	0	0	0	0	0	44	0	0	0	0	0	0	0	0	0	0	0
Otu01378	Bacteria;Firmicutes;Clostridia;Clostridiales;Lachnospiraceae;unclassified_Lachnospiraceae	5	0	0	0	0	1	7	1	0	1	0	0	0	0	0	1	0	0	0	0	3	0	0	0	0	0	0	0	0	1	0	0	0	2	10	0	4	0	0	1	7	0
Otu01379	Bacteria;Firmicutes;Negativicutes;Selenomonadales;Acidaminococcaceae;Phascolarctobacterium	0	0	0	0	0	42	0	0	0	0	0	2	0	0	0	0	0	0	0	0	0	0	0	0	0	0	0	0	0	0	0	0	0	0	0	0	0	0	0	0	0	0
Otu01380	Bacteria;Firmicutes;Clostridia;Clostridiales;Lachnospiraceae;Fusicatenibacter	0	0	0	0	0	0	0	0	0	0	0	0	0	0	4	3	0	0	2	0	0	0	2	2	1	3	5	0	0	0	0	0	0	16	0	0	0	0	0	6	0	0
Otu01381	Bacteria;Firmicutes;Clostridia;Clostridiales;Peptostreptococcaceae;Romboutsia	0	0	2	2	0	1	0	0	0	0	0	0	0	0	0	2	7	0	3	0	0	0	0	1	1	16	0	0	1	1	0	0	0	2	0	0	0	0	0	5	0	0
Otu01382	Bacteria;Firmicutes;Clostridia;Clostridiales;Lachnospiraceae;unclassified_Lachnospiraceae	6	2	0	0	4	1	2	2	0	2	1	0	0	4	4	2	1	0	3	0	8	0	0	0	0	0	1	0	0	0	0	0	0	1	0	0	0	0	0	0	0	0
Otu01383	Bacteria;Firmicutes;Clostridia;Clostridiales;Lachnospiraceae;unclassified_Lachnospiraceae	0	0	0	1	8	0	0	0	7	7	0	0	0	3	1	2	0	0	0	3	0	0	0	1	0	0	0	0	0	0	0	0	4	0	0	0	0	0	0	0	0	7
Otu01384	Bacteria;Firmicutes;Clostridia;Clostridiales;Lachnospiraceae;unclassified_Lachnospiraceae	0	0	0	0	0	0	1	0	8	0	0	0	0	0	0	0	0	2	0	0	0	0	0	0	0	0	0	0	0	1	0	0	31	1	0	0	0	0	0	0	0	0
Otu01385	Bacteria;unclassified_Bacteria;;;;	0	1	1	0	4	0	0	0	0	4	0	0	1	3	4	0	2	5	0	0	7	0	0	1	1	0	1	1	0	0	1	0	0	1	0	0	0	4	2	0	0	0
Otu01386	Bacteria;Firmicutes;Negativicutes;Selenomonadales;Veillonellaceae;Megamonas	0	0	6	0	0	0	0	0	0	0	0	0	0	0	0	0	2	0	0	0	0	4	0	0	10	0	3	1	0	0	0	0	0	0	0	3	0	10	2	3	0	0
Otu01387	Bacteria;Firmicutes;Clostridia;Clostridiales;Ruminococcaceae;unclassified_Ruminococcaceae	0	0	0	0	5	0	0	0	0	1	16	0	0	11	0	11	0	0	0	0	0	0	0	0	0	0	0	0	0	0	0	0	0	0	0	0	0	0	0	0	0	0
Otu01388	Bacteria;unclassified_Bacteria;;;;	0	0	0	0	0	0	0	0	0	0	0	0	0	0	0	0	0	0	0	0	0	1	0	8	0	18	9	0	0	0	0	0	0	0	0	0	0	0	2	6	0	0
Otu01389	Bacteria;unclassified_Bacteria;;;;	0	0	0	0	0	0	0	0	0	1	35	0	0	0	0	8	0	0	0	0	0	0	0	0	0	0	0	0	0	0	0	0	0	0	0	0	0	0	0	0	0	0
Otu01390	Bacteria;Firmicutes;Clostridia;Clostridiales;Lachnospiraceae;unclassified_Lachnospiraceae	0	0	0	0	0	0	13	0	0	0	0	0	0	0	0	0	0	0	0	1	5	0	0	0	0	0	0	0	0	24	0	1	0	0	0	0	0	0	0	0	0	0
Otu01391	Bacteria;Firmicutes;Negativicutes;Selenomonadales;Veillonellaceae;unclassified_Veillonellaceae	0	0	0	0	0	0	0	0	0	0	0	0	0	0	0	0	0	0	0	0	0	0	11	0	0	0	0	0	0	0	0	0	0	0	0	0	0	33	0	0	0	0
Otu01392	Bacteria;Proteobacteria;Gammaproteobacteria;Enterobacteriales;Enterobacteriaceae;unclassified_Enterobacteriaceae	0	0	0	0	0	0	0	0	0	0	0	0	0	0	0	0	0	0	0	0	0	0	0	8	0	0	0	0	1	2	30	0	0	0	0	0	2	0	0	0	1	0
Otu01393	Bacteria;Firmicutes;Clostridia;Clostridiales;unclassified_Clostridiales;	0	0	0	1	1	7	10	2	1	0	1	0	0	0	0	0	1	0	0	3	0	0	0	0	0	0	9	0	0	2	0	0	3	2	0	1	0	0	0	0	0	0
Otu01394	Bacteria;Bacteroidetes;Bacteroidia;Bacteroidales;Bacteroidaceae;Bacteroides	0	0	0	0	0	9	24	5	0	0	0	0	0	0	0	0	0	0	0	0	0	0	0	0	0	0	0	0	0	0	0	5	1	0	0	0	0	0	0	0	0	0
Otu01395	Bacteria;Firmicutes;Clostridia;Clostridiales;unclassified_Clostridiales;	0	4	0	0	0	0	0	0	0	3	16	0	1	6	0	8	0	0	6	0	0	0	0	0	0	0	0	0	0	0	0	0	0	0	0	0	0	0	0	0	0	0
Otu01396	Bacteria;Firmicutes;Clostridia;Clostridiales;unclassified_Clostridiales;	0	0	0	0	14	0	0	0	2	0	0	0	5	3	14	5	0	0	0	0	0	0	0	0	0	0	0	0	0	0	1	0	0	0	0	0	0	0	0	0	0	0
Otu01397	Bacteria;Firmicutes;Negativicutes;Selenomonadales;Veillonellaceae;unclassified_Veillonellaceae	0	0	0	0	0	0	0	0	0	0	0	0	0	0	0	0	0	0	0	0	0	0	0	0	0	0	0	0	0	0	0	0	44	0	0	0	0	0	0	0	0	0
Otu01398	Bacteria;unclassified_Bacteria;;;;	0	0	0	0	0	0	0	0	0	0	0	0	0	0	0	0	0	0	0	0	0	44	0	0	0	0	0	0	0	0	0	0	0	0	0	0	0	0	0	0	0	0
Otu01399	Bacteria;Firmicutes;Clostridia;Clostridiales;Lachnospiraceae;unclassified_Lachnospiraceae	0	0	0	0	2	23	0	11	1	0	1	0	0	1	2	0	0	0	0	3	0	0	0	0	0	0	0	0	0	0	0	0	0	0	0	0	0	0	0	0	0	0
Otu01400	Bacteria;Firmicutes;Clostridia;Clostridiales;Lachnospiraceae;unclassified_Lachnospiraceae	3	0	0	0	0	10	10	0	0	0	0	0	0	0	0	0	0	0	0	1	0	0	0	0	0	0	0	0	0	7	0	0	8	0	4	0	1	0	0	0	0	0
Otu01401	Bacteria;Firmicutes;Clostridia;Clostridiales;unclassified_Clostridiales;	0	0	0	0	23	9	0	0	0	12	0	0	0	0	0	0	0	0	0	0	0	0	0	0	0	0	0	0	0	0	0	0	0	0	0	0	0	0	0	0	0	0
Otu01402	Bacteria;Bacteroidetes;Bacteroidia;Bacteroidales;Prevotellaceae;Prevotella	0	0	1	1	0	0	0	0	0	1	0	0	1	5	3	0	0	2	0	0	1	0	0	2	6	0	4	0	0	0	4	0	0	0	0	2	0	3	0	3	0	5
Otu01403	Bacteria;Firmicutes;Clostridia;Clostridiales;unclassified_Clostridiales;	0	9	0	0	0	0	0	9	8	0	0	1	0	0	0	0	0	1	3	0	5	0	0	0	0	0	0	0	0	0	0	0	0	7	0	0	0	0	0	0	0	0
Otu01404	Bacteria;Firmicutes;Clostridia;Clostridiales;Ruminococcaceae;Faecalibacterium	0	0	0	0	3	4	0	2	0	0	0	0	0	0	1	0	0	0	0	18	1	0	0	0	0	0	0	0	0	0	0	0	3	9	1	0	0	0	1	0	0	0
Otu01405	Bacteria;Bacteroidetes;Bacteroidia;Bacteroidales;Bacteroidaceae;Bacteroides	0	0	1	0	0	0	0	0	0	0	0	0	0	0	0	0	0	0	0	7	26	0	0	1	0	0	0	3	3	0	0	0	0	0	0	1	0	0	0	0	1	0
Otu01406	Bacteria;Firmicutes;Clostridia;Clostridiales;unclassified_Clostridiales;	0	1	1	0	0	1	1	1	0	1	0	0	2	0	1	0	1	2	1	2	0	0	0	0	0	0	1	0	0	0	0	0	4	0	13	0	0	1	0	1	6	2
Otu01407	Bacteria;Firmicutes;Clostridia;Clostridiales;Ruminococcaceae;Gemmiger	9	1	5	0	0	3	0	3	0	0	0	0	1	0	1	1	0	0	0	3	3	0	0	1	0	0	0	0	3	1	0	0	1	2	5	0	0	0	0	0	0	0
Otu01408	Bacteria;Bacteroidetes;Bacteroidia;Bacteroidales;Bacteroidaceae;Bacteroides	0	0	0	0	0	0	0	0	0	0	0	43	0	0	0	0	0	0	0	0	0	0	0	0	0	0	0	0	0	0	0	0	0	0	0	0	0	0	0	0	0	0
Otu01409	Bacteria;Actinobacteria;Actinobacteria;Bifidobacteriales;Bifidobacteriaceae;unclassified_Bifidobacteriaceae	4	0	0	0	0	0	0	0	0	0	0	0	0	0	0	0	0	0	33	0	4	0	0	0	0	0	0	0	0	0	0	0	0	0	0	0	0	0	0	0	2	0
Otu01410	Bacteria;Firmicutes;Clostridia;Clostridiales;Lachnospiraceae;unclassified_Lachnospiraceae	7	0	0	2	1	3	0	2	3	8	0	0	0	0	4	0	0	1	2	0	4	0	0	0	0	0	0	0	0	0	0	0	1	2	3	0	0	0	0	0	0	0
Otu01411	Bacteria;Bacteroidetes;Bacteroidia;Bacteroidales;Porphyromonadaceae;Parabacteroides	1	0	0	0	0	1	3	0	0	0	1	25	0	0	0	4	0	0	0	0	0	0	0	0	0	0	0	0	0	0	0	0	0	0	7	0	0	0	0	0	0	1
Otu01412	Bacteria;Proteobacteria;Betaproteobacteria;Burkholderiales;Sutterellaceae;Parasutterella	0	0	0	0	0	0	0	0	0	0	0	0	0	0	0	0	0	0	0	0	0	0	0	0	0	0	0	0	12	29	0	0	0	1	1	0	0	0	0	0	0	0
Otu01413	Bacteria;Firmicutes;Clostridia;Clostridiales;Lachnospiraceae;unclassified_Lachnospiraceae	2	1	0	0	15	0	1	0	0	2	0	0	1	0	1	3	0	4	0	0	1	0	0	0	0	0	2	0	0	0	0	0	0	1	3	0	0	0	0	0	4	2
Otu01414	Bacteria;unclassified_Bacteria;;;;	0	0	0	0	0	0	0	0	0	0	43	0	0	0	0	0	0	0	0	0	0	0	0	0	0	0	0	0	0	0	0	0	0	0	0	0	0	0	0	0	0	0
Otu01415	Bacteria;Firmicutes;Clostridia;Clostridiales;Lachnospiraceae;Roseburia	0	0	0	0	0	0	0	0	26	0	0	0	0	1	7	2	0	1	0	6	0	0	0	0	0	0	0	0	0	0	0	0	0	0	0	0	0	0	0	0	0	0
Otu01416	Bacteria;Firmicutes;Erysipelotrichia;Erysipelotrichales;Erysipelotrichaceae;unclassified_Erysipelotrichaceae	0	0	0	0	0	0	0	0	5	3	0	0	0	0	1	18	0	0	0	0	0	0	0	0	0	0	14	0	0	0	0	0	0	0	1	0	1	0	0	0	0	0
Otu01417	Bacteria;Firmicutes;Clostridia;Clostridiales;Lachnospiraceae;Roseburia	0	0	2	3	0	0	0	0	4	1	0	0	3	0	7	2	0	6	0	0	0	0	1	0	3	0	1	1	0	1	2	0	0	0	0	0	0	0	0	0	0	6
Otu01418	Bacteria;Proteobacteria;Epsilonproteobacteria;Campylobacterales;Campylobacteraceae;Sulfurospirillum	0	0	0	0	0	0	0	0	0	0	0	0	0	0	0	0	0	0	0	0	0	0	0	0	0	0	0	0	0	0	0	0	0	0	0	0	43	0	0	0	0	0
Otu01419	Bacteria;Bacteroidetes;Bacteroidia;Bacteroidales;Prevotellaceae;Prevotella	0	3	6	0	0	0	0	0	0	2	0	0	4	0	0	0	5	6	0	0	0	0	0	0	3	0	2	1	0	0	0	0	0	0	0	0	0	3	0	0	0	8
Otu01420	Bacteria;Bacteroidetes;Bacteroidia;Bacteroidales;Bacteroidaceae;Bacteroides	0	0	0	0	0	0	0	0	0	0	0	0	0	0	0	0	0	0	0	0	0	43	0	0	0	0	0	0	0	0	0	0	0	0	0	0	0	0	0	0	0	0
Otu01421	Bacteria;Fusobacteria;Fusobacteriia;Fusobacteriales;Fusobacteriaceae;unclassified_Fusobacteriaceae	0	0	0	0	0	0	0	0	0	0	0	0	0	0	0	0	0	1	0	0	0	0	0	17	0	0	18	0	0	0	0	0	0	0	0	0	0	0	1	6	0	0
Otu01422	Bacteria;Firmicutes;Clostridia;Clostridiales;Lachnospiraceae;unclassified_Lachnospiraceae	3	2	2	1	0	1	0	2	1	1	0	0	0	0	1	4	0	0	0	1	0	0	0	0	1	0	0	0	0	0	0	0	2	1	7	0	0	0	0	0	13	0
Otu01423	Bacteria;Proteobacteria;Betaproteobacteria;Burkholderiales;Sutterellaceae;Sutterella	0	0	0	0	0	0	0	0	33	0	0	0	0	1	2	3	0	0	0	0	0	3	0	0	0	0	0	0	0	1	0	0	0	0	0	0	0	0	0	0	0	0
Otu01424	Bacteria;Firmicutes;Clostridia;Clostridiales;Lachnospiraceae;Clostridium XlVa	0	0	0	0	0	0	0	2	0	0	0	0	0	0	0	0	0	0	0	0	0	0	0	0	0	0	0	0	0	41	0	0	0	0	0	0	0	0	0	0	0	0
Otu01425	Bacteria;Bacteroidetes;Bacteroidia;Bacteroidales;unclassified_Bacteroidales;	0	0	1	5	3	0	0	0	4	0	0	0	1	0	0	2	0	2	0	0	0	0	0	5	0	0	0	11	0	0	0	0	0	0	0	0	0	0	8	0	0	1
Otu01426	Bacteria;Bacteroidetes;Bacteroidia;Bacteroidales;unclassified_Bacteroidales;	0	0	0	0	0	0	0	0	0	0	0	0	0	0	6	2	0	0	0	0	0	0	0	0	0	0	0	0	0	0	2	0	0	33	0	0	0	0	0	0	0	0
Otu01427	Bacteria;Firmicutes;Negativicutes;Selenomonadales;Acidaminococcaceae;Phascolarctobacterium	0	0	0	2	0	0	0	0	0	10	4	0	0	6	1	19	0	0	0	0	1	0	0	0	0	0	0	0	0	0	0	0	0	0	0	0	0	0	0	0	0	0
Otu01428	Bacteria;Firmicutes;Clostridia;Clostridiales;Lachnospiraceae;Coprococcus	0	0	0	0	0	0	0	0	37	0	0	0	0	0	0	0	0	0	0	1	0	0	0	0	0	0	0	0	0	0	0	0	0	5	0	0	0	0	0	0	0	0
Otu01429	Bacteria;Firmicutes;Clostridia;Clostridiales;Ruminococcaceae;Faecalibacterium	1	0	2	1	2	1	0	0	1	0	0	0	4	0	1	4	0	0	1	4	0	0	1	0	0	0	0	1	0	0	1	0	5	2	3	0	0	4	0	0	2	1
Otu01430	Bacteria;Firmicutes;Clostridia;Clostridiales;Ruminococcaceae;unclassified_Ruminococcaceae	0	1	0	0	0	2	0	0	1	0	3	5	1	6	0	2	0	1	1	0	0	0	0	0	0	0	0	0	0	0	0	0	0	10	7	0	1	0	0	0	1	0
Otu01431	Bacteria;Firmicutes;Clostridia;Clostridiales;Ruminococcaceae;Faecalibacterium	0	0	4	0	2	0	0	0	1	0	0	0	3	12	0	14	0	2	0	2	0	0	0	0	0	0	0	0	0	0	0	0	1	0	1	0	0	0	0	0	0	0
Otu01432	Bacteria;Bacteroidetes;Bacteroidia;Bacteroidales;Bacteroidaceae;Bacteroides	0	0	0	0	0	0	0	0	0	0	0	0	0	0	0	0	0	0	0	19	0	0	0	0	0	0	0	0	4	0	0	0	0	0	4	0	1	0	0	1	13	0
Otu01433	Bacteria;Firmicutes;Clostridia;Clostridiales;unclassified_Clostridiales;	0	0	0	0	0	2	0	15	0	0	3	0	0	0	0	0	0	0	21	0	0	0	0	0	0	0	0	0	0	0	0	0	0	1	0	0	0	0	0	0	0	0
Otu01434	Bacteria;Firmicutes;Clostridia;Clostridiales;Ruminococcaceae;unclassified_Ruminococcaceae	0	0	0	1	0	2	0	6	2	6	0	0	0	1	2	1	0	4	10	0	0	0	0	0	0	0	0	0	0	0	0	0	0	3	0	0	0	0	0	0	4	0
Otu01435	Bacteria;Firmicutes;Clostridia;Clostridiales;Lachnospiraceae;Lachnospiracea_incertae_sedis	0	1	0	0	2	0	0	3	6	3	0	2	1	0	5	8	0	2	0	0	0	0	0	0	2	0	0	0	1	0	0	0	2	2	1	0	0	0	0	0	0	1
Otu01436	Bacteria;Firmicutes;Clostridia;Clostridiales;Lachnospiraceae;Ruminococcus2	3	1	3	0	4	0	3	0	7	2	0	0	0	1	2	1	1	3	0	1	3	0	0	0	0	0	1	0	1	0	0	0	1	0	2	0	1	0	0	1	0	0
Otu01437	Bacteria;Proteobacteria;Betaproteobacteria;Burkholderiales;Sutterellaceae;Parasutterella	0	0	0	0	0	0	0	0	0	0	0	0	0	0	0	0	0	0	1	1	2	0	0	0	0	0	0	1	4	2	0	0	0	1	30	0	0	0	0	0	0	0
Otu01438	Bacteria;Firmicutes;Clostridia;Clostridiales;Lachnospiraceae;Ruminococcus2	1	0	1	0	1	0	0	0	20	1	0	0	0	1	0	12	0	0	0	1	0	0	1	0	0	0	0	0	0	0	1	0	0	1	0	0	1	0	0	0	0	0
Otu01439	Bacteria;Firmicutes;Clostridia;Clostridiales;Lachnospiraceae;Lachnospiracea_incertae_sedis	5	1	4	2	0	4	1	3	0	0	0	0	1	2	1	5	0	0	0	1	0	0	0	0	0	0	1	1	0	0	0	0	0	1	6	0	0	1	0	0	2	0
Otu01440	Bacteria;Firmicutes;Clostridia;Clostridiales;Lachnospiraceae;unclassified_Lachnospiraceae	0	0	0	1	1	0	5	0	6	1	0	0	0	1	3	3	0	0	2	2	0	0	0	0	0	0	0	0	0	1	0	0	10	0	2	0	2	0	0	0	0	2
Otu01441	Bacteria;Firmicutes;Clostridia;Clostridiales;Lachnospiraceae;unclassified_Lachnospiraceae	0	0	0	0	1	0	0	21	0	1	0	0	0	1	0	3	0	0	5	0	0	0	0	0	0	0	0	0	0	0	1	0	0	9	0	0	0	0	0	0	0	0
Otu01442	Bacteria;Bacteroidetes;Bacteroidia;Bacteroidales;Bacteroidaceae;Bacteroides	0	0	0	0	0	0	0	0	0	0	0	0	0	0	0	0	0	0	0	0	0	0	13	7	0	0	0	0	0	0	0	0	0	0	0	1	0	0	0	21	0	0
Otu01443	Bacteria;Firmicutes;Negativicutes;Selenomonadales;Veillonellaceae;unclassified_Veillonellaceae	0	9	0	0	0	0	0	0	0	0	0	0	1	0	0	0	2	0	0	0	0	0	17	0	6	0	0	0	0	0	6	0	0	0	0	0	0	1	0	0	0	0
Otu01444	Bacteria;Firmicutes;Clostridia;Clostridiales;Lachnospiraceae;Roseburia	0	0	0	0	0	0	0	0	0	7	0	0	3	2	0	0	1	1	0	12	0	0	0	0	0	0	0	0	0	0	0	0	16	0	0	0	0	0	0	0	0	0
Otu01445	Bacteria;Firmicutes;Clostridia;Clostridiales;Lachnospiraceae;unclassified_Lachnospiraceae	0	0	1	0	0	0	0	2	0	0	0	0	0	0	0	0	6	0	0	0	0	0	0	0	0	0	0	0	0	33	0	0	0	0	0	0	0	0	0	0	0	0
Otu01446	Bacteria;Bacteroidetes;Bacteroidia;Bacteroidales;Bacteroidaceae;Bacteroides	0	0	0	0	0	0	0	0	0	0	0	0	0	0	0	0	0	0	0	1	0	0	0	0	0	0	0	0	38	0	0	0	0	0	0	0	0	0	0	0	3	0
Otu01447	Bacteria;Firmicutes;Clostridia;Clostridiales;Lachnospiraceae;Clostridium XlVa	1	2	0	1	0	2	16	1	1	1	0	0	0	0	3	0	0	0	0	0	0	0	0	0	0	0	3	0	1	0	0	0	1	0	4	0	1	0	0	3	0	1
Otu01448	Bacteria;Fusobacteria;Fusobacteriia;Fusobacteriales;Fusobacteriaceae;Cetobacterium	0	0	0	0	0	0	0	0	0	0	0	0	0	0	0	0	0	0	0	0	0	42	0	0	0	0	0	0	0	0	0	0	0	0	0	0	0	0	0	0	0	0
Otu01449	Bacteria;Firmicutes;Erysipelotrichia;Erysipelotrichales;Erysipelotrichaceae;Catenibacterium	0	0	0	0	6	0	0	0	0	14	2	0	0	4	0	0	6	0	0	8	0	0	0	0	0	0	0	0	0	0	0	0	2	0	0	0	0	0	0	0	0	0
Otu01450	Bacteria;Firmicutes;Negativicutes;Selenomonadales;Veillonellaceae;Mitsuokella	0	0	0	0	0	0	0	0	0	0	0	0	0	0	0	0	4	0	0	0	0	0	38	0	0	0	0	0	0	0	0	0	0	0	0	0	0	0	0	0	0	0
Otu01451	Bacteria;Actinobacteria;Actinobacteria;Bifidobacteriales;Bifidobacteriaceae;unclassified_Bifidobacteriaceae	0	0	0	0	0	0	0	0	0	0	0	0	0	0	0	0	0	0	0	0	0	0	1	0	0	0	0	0	19	3	0	0	0	15	0	0	0	0	0	1	3	0
Otu01452	Bacteria;Bacteroidetes;Bacteroidia;Bacteroidales;Prevotellaceae;Prevotella	0	0	0	0	0	0	0	0	0	0	0	0	8	0	0	0	34	0	0	0	0	0	0	0	0	0	0	0	0	0	0	0	0	0	0	0	0	0	0	0	0	0
Otu01453	Bacteria;Bacteroidetes;Bacteroidia;Bacteroidales;Prevotellaceae;Prevotella	0	0	0	8	0	0	0	0	2	7	0	0	5	6	0	5	6	0	0	0	0	0	0	0	0	0	0	0	0	0	3	0	0	0	0	0	0	0	0	0	0	0
Otu01454	Bacteria;Firmicutes;Clostridia;Clostridiales;Lachnospiraceae;Clostridium XlVa	0	0	0	0	0	2	0	0	0	0	2	35	0	0	0	0	0	0	0	0	2	0	0	0	0	0	0	0	0	0	0	0	0	0	0	0	0	0	0	0	0	0
Otu01455	Bacteria;Firmicutes;Clostridia;Clostridiales;Ruminococcaceae;unclassified_Ruminococcaceae	0	0	0	0	0	0	0	0	0	0	4	0	0	1	0	36	0	0	0	0	0	0	0	0	0	0	0	0	0	0	0	0	0	0	0	0	0	0	0	0	0	0
Otu01456	Bacteria;unclassified_Bacteria;;;;	0	0	0	0	0	33	0	0	0	0	0	0	0	3	0	5	0	0	0	0	0	0	0	0	0	0	0	0	0	0	0	0	0	0	0	0	0	0	0	0	0	0
Otu01457	Bacteria;Firmicutes;Clostridia;Clostridiales;Lachnospiraceae;Lachnospiracea_incertae_sedis	0	1	0	0	0	0	0	5	1	1	0	0	0	0	3	14	1	0	0	0	0	0	0	0	0	0	0	0	0	0	0	0	6	0	4	0	0	0	0	0	0	5
Otu01458	Bacteria;Firmicutes;Clostridia;Clostridiales;Ruminococcaceae;unclassified_Ruminococcaceae	0	4	0	0	7	0	0	1	4	2	1	0	0	2	0	8	1	0	0	3	0	0	0	0	0	0	0	0	0	0	0	0	0	5	0	0	3	0	0	0	0	0
Otu01459	Bacteria;Firmicutes;Clostridia;Clostridiales;unclassified_Clostridiales;	0	0	1	1	1	1	0	2	4	8	5	0	1	1	3	8	1	1	0	0	0	0	0	0	0	0	0	0	0	0	0	0	1	2	0	0	0	0	0	0	0	0
Otu01460	Bacteria;Bacteroidetes;Bacteroidia;Bacteroidales;Porphyromonadaceae;Parabacteroides	1	0	0	0	0	0	1	0	0	0	0	1	0	0	0	4	2	0	0	1	0	3	0	0	0	0	0	0	3	0	0	2	0	2	14	0	0	0	0	0	4	3
Otu01461	Bacteria;Firmicutes;Clostridia;Clostridiales;unclassified_Clostridiales;	0	0	0	1	2	5	0	0	0	0	3	0	0	7	1	4	0	0	0	17	0	0	0	0	1	0	0	0	0	0	0	0	0	0	0	0	0	0	0	0	0	0
Otu01462	Bacteria;Firmicutes;Clostridia;Clostridiales;Lachnospiraceae;Lachnospiracea_incertae_sedis	0	0	0	0	0	1	1	9	0	0	0	0	1	0	0	0	0	0	0	1	0	0	0	0	0	0	0	0	0	5	0	0	1	1	12	0	0	2	0	0	7	0
Otu01463	Bacteria;Firmicutes;Negativicutes;Selenomonadales;Veillonellaceae;Megamonas	0	2	3	1	0	0	0	0	0	0	0	0	0	0	2	2	0	1	0	0	0	0	0	0	5	0	2	0	0	0	1	0	1	4	0	0	0	12	5	0	0	0
Otu01464	Bacteria;Firmicutes;Clostridia;Clostridiales;Lachnospiraceae;Lachnospiracea_incertae_sedis	11	0	0	2	0	0	0	4	4	4	0	0	1	0	3	1	0	2	1	0	0	0	0	0	0	0	0	0	0	0	0	0	6	0	1	0	0	0	0	0	0	1
Otu01465	Bacteria;Firmicutes;Erysipelotrichia;Erysipelotrichales;Erysipelotrichaceae;Holdemanella	0	0	0	0	0	0	0	0	38	0	0	0	0	0	1	0	0	2	0	0	0	0	0	0	0	0	0	0	0	0	0	0	0	0	0	0	0	0	0	0	0	0
Otu01466	Bacteria;unclassified_Bacteria;;;;	0	0	0	0	0	0	0	0	0	0	0	0	0	0	0	0	0	0	0	0	0	0	0	0	0	0	0	0	0	0	0	0	0	41	0	0	0	0	0	0	0	0
Otu01467	Bacteria;Bacteroidetes;Bacteroidia;Bacteroidales;Bacteroidaceae;Bacteroides	0	0	0	0	0	0	0	0	0	0	0	0	0	0	0	0	0	0	0	6	0	0	0	1	0	8	0	0	26	0	0	0	0	0	0	0	0	0	0	0	0	0
Otu01468	Bacteria;Firmicutes;Clostridia;Clostridiales;unclassified_Clostridiales;	0	0	0	0	1	0	0	0	0	0	5	0	0	6	0	29	0	0	0	0	0	0	0	0	0	0	0	0	0	0	0	0	0	0	0	0	0	0	0	0	0	0
Otu01469	Bacteria;Firmicutes;Negativicutes;Selenomonadales;Veillonellaceae;Megasphaera	0	0	0	0	0	0	0	0	0	0	0	0	0	0	0	0	0	0	0	41	0	0	0	0	0	0	0	0	0	0	0	0	0	0	0	0	0	0	0	0	0	0
Otu01470	Bacteria;Firmicutes;Erysipelotrichia;Erysipelotrichales;Erysipelotrichaceae;unclassified_Erysipelotrichaceae	11	1	2	0	0	0	2	2	0	0	0	2	0	0	1	2	0	1	1	0	9	0	0	0	0	0	0	0	0	1	0	2	0	0	2	0	1	0	0	1	0	0
Otu01471	Bacteria;Firmicutes;Negativicutes;Selenomonadales;Veillonellaceae;Mitsuokella	0	0	0	0	0	0	0	0	0	0	0	0	17	3	0	0	21	0	0	0	0	0	0	0	0	0	0	0	0	0	0	0	0	0	0	0	0	0	0	0	0	0
Otu01472	Bacteria;unclassified_Bacteria;;;;	0	0	0	0	0	0	0	0	2	0	0	0	0	0	0	0	0	1	0	0	0	0	0	0	0	0	0	0	0	0	0	0	38	0	0	0	0	0	0	0	0	0
Otu01473	Bacteria;Firmicutes;Clostridia;Clostridiales;Lachnospiraceae;Cellulosilyticum	0	0	0	0	41	0	0	0	0	0	0	0	0	0	0	0	0	0	0	0	0	0	0	0	0	0	0	0	0	0	0	0	0	0	0	0	0	0	0	0	0	0
Otu01474	Bacteria;Bacteroidetes;Bacteroidia;Bacteroidales;Prevotellaceae;Prevotella	0	0	0	0	0	0	0	0	28	0	1	0	0	0	0	2	0	0	0	0	0	0	0	0	1	0	0	0	0	0	1	0	8	0	0	0	0	0	0	0	0	0
Otu01475	Bacteria;Firmicutes;Clostridia;Clostridiales;Ruminococcaceae;unclassified_Ruminococcaceae	0	0	0	0	1	0	0	4	0	0	22	0	0	0	1	0	0	0	13	0	0	0	0	0	0	0	0	0	0	0	0	0	0	0	0	0	0	0	0	0	0	0
Otu01476	Bacteria;Bacteroidetes;Bacteroidia;Bacteroidales;Bacteroidaceae;Bacteroides	0	0	0	0	0	0	0	0	0	0	0	0	0	0	0	0	0	0	0	0	0	0	19	0	1	0	2	0	0	0	0	0	0	0	0	15	0	0	0	0	4	0
Otu01477	Bacteria;Firmicutes;Clostridia;Clostridiales;Ruminococcaceae;unclassified_Ruminococcaceae	0	0	0	0	0	8	0	5	0	0	24	0	0	0	1	0	0	0	0	3	0	0	0	0	0	0	0	0	0	0	0	0	0	0	0	0	0	0	0	0	0	0
Otu01478	Bacteria;Bacteroidetes;Bacteroidia;Bacteroidales;Bacteroidaceae;Bacteroides	0	0	0	0	0	0	0	0	0	0	0	0	0	0	0	0	0	0	0	6	0	0	1	0	0	2	0	0	27	0	0	0	0	0	0	0	0	0	0	0	5	0
Otu01479	Bacteria;Proteobacteria;Betaproteobacteria;Burkholderiales;Sutterellaceae;Sutterella	0	0	0	1	4	0	0	0	30	0	0	0	0	6	0	0	0	0	0	0	0	0	0	0	0	0	0	0	0	0	0	0	0	0	0	0	0	0	0	0	0	0
Otu01480	Bacteria;Firmicutes;Clostridia;Clostridiales;Ruminococcaceae;Ruminococcus	0	0	0	0	0	0	0	0	0	0	0	1	0	0	0	0	0	0	0	1	0	0	0	0	0	0	0	0	0	0	1	0	0	30	6	0	1	0	0	0	0	0
Otu01481	Bacteria;Actinobacteria;Actinobacteria;Coriobacteriales;Coriobacteriaceae;unclassified_Coriobacteriaceae	0	2	0	0	0	4	0	6	0	0	1	1	0	0	0	1	0	0	0	0	0	0	0	5	0	0	0	0	0	0	2	0	0	10	6	0	1	0	0	0	0	1
Otu01482	Bacteria;Firmicutes;Negativicutes;Selenomonadales;Acidaminococcaceae;Phascolarctobacterium	0	0	0	0	0	13	0	3	0	0	0	5	0	0	0	0	0	0	2	1	0	0	0	0	0	0	0	2	0	0	0	3	0	0	7	0	0	2	0	0	0	2
Otu01483	Bacteria;Firmicutes;Clostridia;Clostridiales;Ruminococcaceae;unclassified_Ruminococcaceae	2	1	4	0	0	2	0	0	0	0	0	0	1	4	0	4	0	1	1	2	0	0	0	1	0	0	0	1	0	0	0	0	1	5	10	0	0	0	0	0	0	0
Otu01484	Bacteria;Firmicutes;Clostridia;Clostridiales;Ruminococcaceae;unclassified_Ruminococcaceae	0	0	0	0	1	2	0	1	0	0	29	0	0	0	0	2	0	0	5	0	0	0	0	0	0	0	0	0	0	0	0	0	0	0	0	0	0	0	0	0	0	0
Otu01485	Bacteria;Proteobacteria;Gammaproteobacteria;Enterobacteriales;Enterobacteriaceae;Escherichia/Shigella	0	0	0	0	0	0	0	0	0	0	0	2	0	0	0	0	4	0	1	0	0	18	0	4	0	2	0	0	0	0	3	4	0	0	0	0	0	0	0	1	1	0
Otu01486	Bacteria;Firmicutes;Bacilli;Lactobacillales;Streptococcaceae;Streptococcus	0	4	0	0	0	0	0	0	2	0	0	0	0	0	0	0	0	14	1	0	0	0	0	0	0	0	0	0	1	0	1	0	15	0	0	1	0	0	0	0	0	1
Otu01487	Bacteria;Bacteroidetes;Bacteroidia;Bacteroidales;Porphyromonadaceae;Barnesiella	0	0	0	0	0	0	0	0	0	0	0	0	0	0	1	0	0	0	0	21	0	0	0	0	0	0	0	0	12	0	0	0	0	0	0	0	6	0	0	0	0	0
Otu01488	Bacteria;Firmicutes;unclassified_Firmicutes;;;	18	0	1	0	0	0	0	0	0	0	0	0	0	0	1	0	0	2	1	1	2	0	0	0	0	0	0	0	0	0	0	0	0	0	10	0	0	0	0	0	4	0
Otu01489	Bacteria;Firmicutes;Clostridia;Clostridiales;Ruminococcaceae;Faecalibacterium	0	31	0	0	5	0	0	0	1	0	0	0	1	0	0	0	0	0	0	0	0	0	0	0	0	0	0	0	0	0	0	0	0	0	0	0	0	2	0	0	0	0
Otu01490	Bacteria;Firmicutes;Clostridia;Clostridiales;unclassified_Clostridiales;	0	0	0	0	2	0	0	13	1	0	2	0	0	0	3	0	0	0	15	4	0	0	0	0	0	0	0	0	0	0	0	0	0	0	0	0	0	0	0	0	0	0
Otu01491	Bacteria;Bacteroidetes;Bacteroidia;Bacteroidales;Bacteroidaceae;Bacteroides	0	0	0	0	0	25	4	8	0	0	0	0	0	0	1	0	0	0	0	0	1	0	0	0	0	0	0	0	0	0	0	1	0	0	0	0	0	0	0	0	0	0
Otu01492	Bacteria;Firmicutes;Clostridia;Clostridiales;Lachnospiraceae;unclassified_Lachnospiraceae	1	0	0	0	1	3	0	5	10	3	0	0	0	3	4	1	0	0	0	3	0	0	0	0	0	0	2	0	0	1	0	0	0	1	1	0	0	0	0	0	1	0
Otu01493	Bacteria;Actinobacteria;Actinobacteria;Bifidobacteriales;Bifidobacteriaceae;unclassified_Bifidobacteriaceae	0	0	0	0	0	1	0	0	0	0	0	6	0	0	0	0	0	0	33	0	0	0	0	0	0	0	0	0	0	0	0	0	0	0	0	0	0	0	0	0	0	0
Otu01494	Bacteria;unclassified_Bacteria;;;;	0	3	0	0	0	0	0	0	0	0	0	0	0	0	0	0	0	0	0	0	0	0	0	0	9	0	23	0	0	0	0	0	0	0	0	0	0	0	5	0	0	0
Otu01495	Bacteria;Firmicutes;Clostridia;Clostridiales;Lachnospiraceae;unclassified_Lachnospiraceae	0	0	0	0	13	6	0	2	0	18	0	0	0	0	0	1	0	0	0	0	0	0	0	0	0	0	0	0	0	0	0	0	0	0	0	0	0	0	0	0	0	0
Otu01496	Bacteria;Proteobacteria;Betaproteobacteria;Burkholderiales;Sutterellaceae;Parasutterella	0	0	0	0	0	0	0	0	0	0	0	0	0	0	0	0	0	0	0	0	0	0	0	0	0	0	0	0	0	35	0	0	0	4	0	0	0	0	1	0	0	0
Otu01497	Bacteria;Proteobacteria;unclassified_Proteobacteria;;;	0	0	0	0	0	40	0	0	0	0	0	0	0	0	0	0	0	0	0	0	0	0	0	0	0	0	0	0	0	0	0	0	0	0	0	0	0	0	0	0	0	0
Otu01498	Bacteria;Firmicutes;unclassified_Firmicutes;;;	38	0	0	0	0	0	0	0	0	0	0	0	0	0	0	0	0	0	0	0	0	0	0	0	0	0	1	0	0	0	0	0	0	0	0	0	0	0	0	1	0	0
Otu01499	Bacteria;Firmicutes;Negativicutes;Selenomonadales;Veillonellaceae;Megamonas	0	0	0	0	0	0	0	0	0	0	0	0	0	0	0	0	1	0	0	0	0	0	0	3	0	0	0	0	0	0	1	0	0	0	0	25	0	0	3	7	0	0
Otu01500	Bacteria;Firmicutes;Clostridia;Clostridiales;Lachnospiraceae;Lachnospiracea_incertae_sedis	16	2	1	0	0	8	0	1	2	0	0	0	0	0	1	1	0	0	0	0	0	0	0	0	0	0	5	1	0	1	0	0	0	0	0	0	1	0	0	0	0	0
Otu01501	Bacteria;Firmicutes;Negativicutes;Selenomonadales;Veillonellaceae;Megamonas	0	0	0	0	0	0	0	0	0	0	0	0	0	0	1	4	0	0	0	0	0	0	0	3	0	0	2	6	0	0	0	0	0	4	0	0	0	0	0	20	0	0
Otu01502	Bacteria;Firmicutes;Clostridia;Clostridiales;Lachnospiraceae;unclassified_Lachnospiraceae	0	0	0	0	0	0	0	19	0	0	0	0	0	0	0	0	3	0	0	0	0	0	0	0	0	0	0	0	0	17	0	0	0	1	0	0	0	0	0	0	0	0
Otu01503	Bacteria;Firmicutes;unclassified_Firmicutes;;;	0	0	0	0	0	0	0	0	0	0	0	0	0	0	0	0	0	1	0	0	0	0	0	0	0	0	0	0	0	0	0	0	39	0	0	0	0	0	0	0	0	0
Otu01504	Bacteria;Bacteroidetes;Bacteroidia;Bacteroidales;Prevotellaceae;Prevotella	0	0	0	0	0	0	0	0	0	0	0	0	0	0	0	0	0	0	0	0	0	0	0	0	0	0	0	0	0	0	0	0	0	0	0	0	0	0	0	40	0	0
Otu01505	Bacteria;Firmicutes;Erysipelotrichia;Erysipelotrichales;Erysipelotrichaceae;Catenibacterium	0	0	0	0	0	0	0	0	0	0	0	0	0	0	0	0	0	0	0	0	0	0	0	0	0	0	0	0	0	0	0	0	40	0	0	0	0	0	0	0	0	0
Otu01506	Bacteria;Firmicutes;Clostridia;Clostridiales;Lachnospiraceae;unclassified_Lachnospiraceae	0	0	0	2	2	0	0	0	0	0	4	0	0	15	0	15	0	1	0	0	0	0	0	0	0	0	0	0	0	0	0	0	0	1	0	0	0	0	0	0	0	0
Otu01507	Bacteria;Bacteroidetes;Bacteroidia;Bacteroidales;Prevotellaceae;Prevotella	0	15	0	0	0	0	0	0	0	0	0	0	0	0	0	0	0	6	0	0	1	0	7	0	0	0	0	11	0	0	0	0	0	0	0	0	0	0	0	0	0	0
Otu01508	Bacteria;Bacteroidetes;Bacteroidia;Bacteroidales;unclassified_Bacteroidales;	0	0	0	0	0	27	0	6	0	0	0	0	0	0	0	0	0	0	0	0	0	0	0	0	0	0	0	0	0	0	0	0	0	6	0	0	0	0	0	0	0	0
Otu01509	Bacteria;Firmicutes;Clostridia;Clostridiales;Ruminococcaceae;Faecalibacterium	4	0	1	0	1	0	2	1	0	0	0	0	5	0	0	1	1	1	0	3	0	0	0	0	0	0	1	0	0	0	0	0	2	2	7	0	0	0	0	0	3	4
Otu01510	Bacteria;Firmicutes;Clostridia;Clostridiales;Ruminococcaceae;Faecalibacterium	0	0	3	2	11	0	3	1	0	0	2	0	0	0	0	0	0	0	0	3	0	0	0	0	0	0	3	0	0	0	0	0	2	3	2	0	1	0	0	0	0	3
Otu01511	Bacteria;Firmicutes;Clostridia;Clostridiales;Lachnospiraceae;Fusicatenibacter	1	0	0	0	1	1	0	7	0	0	2	0	0	0	0	0	0	0	19	1	0	0	0	0	0	0	0	0	0	0	0	0	0	4	3	0	0	0	0	0	0	0
Otu01512	Bacteria;unclassified_Bacteria;;;;	0	0	0	0	0	1	0	1	0	0	0	0	0	0	0	0	0	0	1	0	0	0	0	0	0	0	0	0	0	5	0	1	28	0	2	0	0	0	0	0	0	0
Otu01513	Bacteria;unclassified_Bacteria;;;;	0	0	0	0	0	6	21	2	1	0	0	0	0	0	0	0	0	0	0	0	0	1	0	0	0	0	0	0	0	7	0	0	0	0	1	0	0	0	0	0	0	0
Otu01514	Bacteria;Firmicutes;Negativicutes;Selenomonadales;Veillonellaceae;Dialister	0	38	0	0	0	0	0	0	0	0	0	0	0	0	0	0	0	0	0	0	0	0	0	0	0	0	0	0	0	0	0	0	0	0	0	1	0	0	0	0	0	0
Otu01515	Bacteria;Bacteroidetes;Bacteroidia;Bacteroidales;Porphyromonadaceae;Parabacteroides	0	0	0	0	0	0	0	0	0	0	3	36	0	0	0	0	0	0	0	0	0	0	0	0	0	0	0	0	0	0	0	0	0	0	0	0	0	0	0	0	0	0
Otu01516	Bacteria;Bacteroidetes;Bacteroidia;Bacteroidales;Bacteroidaceae;Bacteroides	0	0	1	0	0	0	0	0	2	0	0	0	0	0	2	3	0	0	0	0	5	0	1	2	3	0	0	9	0	1	0	0	0	5	0	0	0	0	1	0	0	4
Otu01517	Bacteria;Bacteroidetes;Bacteroidia;Bacteroidales;unclassified_Bacteroidales;	0	0	0	0	0	0	29	4	1	0	0	0	0	0	0	0	0	0	0	0	0	0	0	0	0	0	0	0	0	0	0	5	0	0	0	0	0	0	0	0	0	0
Otu01518	Bacteria;Actinobacteria;Actinobacteria;Bifidobacteriales;Bifidobacteriaceae;unclassified_Bifidobacteriaceae	0	0	0	0	0	13	0	0	0	0	0	17	0	0	0	0	0	0	1	0	0	0	0	0	0	0	0	0	6	1	0	0	0	1	0	0	0	0	0	0	0	0
Otu01519	Bacteria;Firmicutes;Clostridia;Clostridiales;Ruminococcaceae;Ruminococcus	0	0	0	0	0	0	0	0	0	0	34	5	0	0	0	0	0	0	0	0	0	0	0	0	0	0	0	0	0	0	0	0	0	0	0	0	0	0	0	0	0	0
Otu01520	Bacteria;Firmicutes;Negativicutes;Selenomonadales;Veillonellaceae;Megamonas	0	4	0	0	0	0	0	0	0	0	0	0	0	0	0	1	0	0	0	0	0	0	0	5	4	1	2	0	0	0	0	0	5	1	0	15	0	0	1	0	0	0
Otu01521	Bacteria;Bacteroidetes;Bacteroidia;Bacteroidales;Bacteroidaceae;Bacteroides	0	0	0	0	0	0	0	0	0	0	0	0	0	0	0	0	0	0	0	0	5	0	1	1	1	0	1	26	0	0	0	0	0	0	0	3	0	0	0	1	0	0
Otu01522	Bacteria;Bacteroidetes;Bacteroidia;Bacteroidales;Bacteroidaceae;Bacteroides	0	0	0	0	0	0	0	0	0	0	0	0	0	0	0	0	0	0	0	0	0	0	0	0	0	4	0	0	0	0	0	0	0	0	0	0	0	0	0	0	35	0
Otu01523	Bacteria;Firmicutes;Negativicutes;Selenomonadales;unclassified_Selenomonadales;	0	0	1	0	0	0	0	0	0	0	0	0	0	0	2	1	0	0	1	0	0	14	0	2	0	4	0	5	0	0	0	0	1	0	0	0	0	0	8	0	0	0
Otu01524	Bacteria;Firmicutes;Negativicutes;Selenomonadales;Veillonellaceae;Megamonas	0	0	0	0	0	0	0	0	0	0	0	0	0	0	0	0	0	0	0	0	0	0	0	2	1	4	1	10	0	0	0	0	0	1	0	5	0	0	0	15	0	0
Otu01525	Bacteria;unclassified_Bacteria;;;;	0	0	0	0	0	0	0	2	0	0	0	33	0	0	0	0	0	0	4	0	0	0	0	0	0	0	0	0	0	0	0	0	0	0	0	0	0	0	0	0	0	0
Otu01526	Bacteria;Firmicutes;Clostridia;Clostridiales;Ruminococcaceae;unclassified_Ruminococcaceae	0	0	0	6	16	0	0	0	0	0	11	0	0	3	0	3	0	0	0	0	0	0	0	0	0	0	0	0	0	0	0	0	0	0	0	0	0	0	0	0	0	0
Otu01527	Bacteria;Bacteroidetes;Bacteroidia;Bacteroidales;Bacteroidaceae;Bacteroides	0	0	0	0	0	0	0	0	0	0	0	0	0	0	0	0	0	0	0	0	0	0	0	0	0	0	0	0	0	0	0	0	0	0	0	0	0	0	0	39	0	0
Otu01528	Bacteria;Firmicutes;Clostridia;Clostridiales;unclassified_Clostridiales;	0	0	0	0	0	8	0	8	0	0	14	0	0	0	0	0	0	0	0	9	0	0	0	0	0	0	0	0	0	0	0	0	0	0	0	0	0	0	0	0	0	0
Otu01529	Bacteria;Bacteroidetes;Bacteroidia;Bacteroidales;Prevotellaceae;Alloprevotella	0	0	0	4	0	0	0	0	0	1	0	0	4	1	3	5	12	0	0	0	0	0	0	0	0	0	0	0	0	0	9	0	0	0	0	0	0	0	0	0	0	0
Otu01530	Bacteria;Fusobacteria;Fusobacteriia;Fusobacteriales;Fusobacteriaceae;unclassified_Fusobacteriaceae	0	0	0	0	0	0	0	0	0	0	0	0	0	0	0	0	0	0	0	0	0	0	0	0	0	39	0	0	0	0	0	0	0	0	0	0	0	0	0	0	0	0
Otu01531	Bacteria;Bacteroidetes;Bacteroidia;Bacteroidales;unclassified_Bacteroidales;	0	0	0	0	0	4	0	1	0	0	0	26	0	0	0	0	0	0	8	0	0	0	0	0	0	0	0	0	0	0	0	0	0	0	0	0	0	0	0	0	0	0
Otu01532	Bacteria;Firmicutes;Clostridia;Clostridiales;Ruminococcaceae;unclassified_Ruminococcaceae	1	4	0	0	0	3	0	3	1	0	3	6	0	0	0	1	1	0	10	0	0	0	0	0	0	0	0	0	0	0	1	0	0	3	0	0	0	0	0	0	0	1
Otu01533	Bacteria;Firmicutes;Clostridia;Clostridiales;Ruminococcaceae;Faecalibacterium	4	0	0	1	0	1	0	2	0	0	0	0	0	0	0	2	0	0	2	8	4	0	0	0	0	0	0	0	0	0	0	0	0	2	5	0	0	1	0	0	6	0
Otu01534	Bacteria;Bacteroidetes;Bacteroidia;Bacteroidales;Bacteroidaceae;Bacteroides	0	0	1	0	0	4	5	6	2	0	0	0	0	0	0	0	0	0	0	0	0	0	0	0	0	0	0	0	1	8	0	9	0	1	1	0	0	0	0	0	0	0
Otu01535	Bacteria;Firmicutes;Clostridia;Clostridiales;Lachnospiraceae;unclassified_Lachnospiraceae	0	0	1	0	2	2	0	1	0	4	0	0	1	1	2	10	1	0	0	0	0	0	0	0	1	0	0	0	0	0	1	0	0	1	3	0	0	1	0	0	2	4
Otu01536	Bacteria;Bacteroidetes;Bacteroidia;Bacteroidales;Porphyromonadaceae;Parabacteroides	2	0	0	0	0	1	0	0	0	0	0	23	0	0	0	0	0	0	11	0	0	0	0	0	0	0	0	1	0	0	0	0	0	0	0	0	0	0	0	0	0	0
Otu01537	Bacteria;Firmicutes;Clostridia;Clostridiales;Ruminococcaceae;unclassified_Ruminococcaceae	0	0	0	0	0	0	0	1	0	0	2	0	0	0	0	0	0	0	35	0	0	0	0	0	0	0	0	0	0	0	0	0	0	0	0	0	0	0	0	0	0	0
Otu01538	Bacteria;Firmicutes;Clostridia;Clostridiales;Lachnospiraceae;Blautia	1	0	0	1	0	0	0	5	1	0	0	0	0	3	2	0	0	0	2	3	12	0	0	1	0	0	0	0	3	0	0	0	0	0	3	0	0	0	0	0	0	1
Otu01539	Bacteria;Firmicutes;Clostridia;Clostridiales;Ruminococcaceae;Gemmiger	8	1	1	0	0	4	0	0	0	0	0	0	0	0	1	0	0	0	2	0	12	0	0	2	0	0	0	0	0	6	0	0	0	0	0	0	0	1	0	0	0	0
Otu01540	Bacteria;Firmicutes;unclassified_Firmicutes;;;	0	0	0	0	1	0	0	0	0	0	30	0	0	2	4	0	0	0	0	0	0	0	0	0	0	0	0	0	0	0	1	0	0	0	0	0	0	0	0	0	0	0
Otu01541	Bacteria;Fusobacteria;Fusobacteriia;Fusobacteriales;Fusobacteriaceae;unclassified_Fusobacteriaceae	0	0	0	0	0	0	0	0	19	0	0	0	0	0	0	0	0	0	0	0	0	0	0	0	0	4	11	0	0	0	0	2	1	0	0	0	0	0	0	1	0	0
Otu01542	Bacteria;Firmicutes;Clostridia;Clostridiales;Lachnospiraceae;Blautia	2	1	0	0	4	1	0	7	0	0	0	0	0	2	6	0	1	0	5	0	6	0	0	0	0	0	0	0	0	0	0	0	1	2	0	0	0	0	0	0	0	0
Otu01543	Bacteria;Bacteroidetes;Bacteroidia;Bacteroidales;Prevotellaceae;Paraprevotella	0	0	0	0	0	0	0	0	0	0	0	0	0	0	0	0	0	0	0	0	0	0	0	38	0	0	0	0	0	0	0	0	0	0	0	0	0	0	0	0	0	0
Otu01544	Bacteria;unclassified_Bacteria;;;;	0	0	0	0	12	0	0	0	0	0	3	0	0	20	0	0	1	0	0	0	0	0	0	0	0	0	0	0	0	0	0	0	2	0	0	0	0	0	0	0	0	0
Otu01545	Bacteria;Bacteroidetes;Bacteroidia;Bacteroidales;unclassified_Bacteroidales;	0	0	0	0	0	12	0	9	0	0	0	2	0	0	0	0	0	0	0	2	5	0	0	0	0	0	0	0	0	0	0	0	0	8	0	0	0	0	0	0	0	0
Otu01546	Bacteria;Firmicutes;Clostridia;Clostridiales;Ruminococcaceae;Faecalibacterium	0	0	0	0	2	0	0	0	0	3	0	0	11	0	0	1	0	1	0	3	0	0	0	0	2	0	0	0	0	0	0	0	0	0	5	0	0	0	1	0	0	9
Otu01547	Bacteria;Firmicutes;Clostridia;Clostridiales;Lachnospiraceae;unclassified_Lachnospiraceae	0	0	1	3	0	0	0	0	0	4	0	0	0	1	3	11	8	1	0	0	0	0	0	0	2	0	0	0	0	0	1	0	0	0	2	0	0	0	0	0	0	1
Otu01548	Bacteria;Firmicutes;Clostridia;Clostridiales;Ruminococcaceae;Ruminococcus	0	0	0	0	3	0	0	0	0	4	0	0	2	14	2	0	0	0	0	11	0	0	0	0	0	0	0	0	0	0	0	0	0	1	0	0	0	0	0	0	0	1
Otu01549	Bacteria;Firmicutes;Clostridia;Clostridiales;Lachnospiraceae;Roseburia	0	1	0	0	0	0	0	11	2	0	0	0	0	0	0	0	0	0	0	18	0	0	0	0	0	0	0	0	0	0	0	0	3	2	1	0	0	0	0	0	0	0
Otu01550	Bacteria;Firmicutes;Negativicutes;Selenomonadales;Acidaminococcaceae;Phascolarctobacterium	2	0	0	0	0	0	0	1	0	0	0	11	0	0	0	0	0	0	21	0	2	0	0	0	0	0	0	0	0	0	0	0	0	0	1	0	0	0	0	0	0	0
Otu01551	Bacteria;Firmicutes;Clostridia;Clostridiales;Lachnospiraceae;Lachnospiracea_incertae_sedis	1	0	0	0	0	2	13	2	0	4	0	0	0	0	1	2	0	0	0	1	0	0	0	0	1	0	1	0	0	0	0	0	4	0	5	0	1	0	0	0	0	0
Otu01552	Bacteria;Firmicutes;Clostridia;Clostridiales;Ruminococcaceae;Ruminococcus	0	0	0	3	0	0	0	3	0	2	0	0	0	0	3	0	0	0	0	12	0	0	0	0	0	0	0	0	1	0	0	0	0	0	8	0	1	0	5	0	0	0
Otu01553	Bacteria;Bacteroidetes;unclassified_Bacteroidetes;;;	0	34	0	0	3	0	0	0	0	0	0	0	0	0	0	0	0	0	0	0	0	0	0	0	1	0	0	0	0	0	0	0	0	0	0	0	0	0	0	0	0	0
Otu01554	Bacteria;Bacteroidetes;Bacteroidia;Bacteroidales;Prevotellaceae;Prevotella	0	1	4	4	11	0	0	0	0	2	0	0	0	0	0	0	0	0	0	0	0	0	1	0	4	0	10	0	0	0	0	0	0	0	0	1	0	0	0	0	0	0
Otu01555	Bacteria;Proteobacteria;Betaproteobacteria;Burkholderiales;Sutterellaceae;Parasutterella	0	0	0	0	0	0	0	0	0	0	0	0	0	0	0	0	0	0	0	0	0	0	3	0	0	0	0	0	11	18	0	0	0	6	0	0	0	0	0	0	0	0
Otu01556	Bacteria;Firmicutes;Clostridia;Clostridiales;Lachnospiraceae;unclassified_Lachnospiraceae	0	0	0	0	30	6	0	0	0	1	0	0	0	0	0	0	1	0	0	0	0	0	0	0	0	0	0	0	0	0	0	0	0	0	0	0	0	0	0	0	0	0
Otu01557	Bacteria;Bacteroidetes;Bacteroidia;Bacteroidales;Prevotellaceae;Prevotella	0	1	0	1	2	0	0	0	0	0	0	0	1	3	6	0	0	6	0	0	0	0	0	1	3	0	0	5	0	0	0	0	0	0	0	0	0	0	2	2	0	5
Otu01558	Bacteria;Firmicutes;Negativicutes;Selenomonadales;Acidaminococcaceae;Phascolarctobacterium	1	0	0	1	0	5	0	1	0	0	0	5	0	0	0	0	0	0	9	0	11	0	0	0	0	0	0	0	0	0	0	1	0	0	4	0	0	0	0	0	0	0
Otu01559	Bacteria;Actinobacteria;Actinobacteria;Coriobacteriales;Coriobacteriaceae;Olsenella	0	0	0	0	0	0	0	0	0	0	0	0	7	0	0	0	2	0	0	28	0	0	0	0	0	0	0	0	0	0	0	0	0	0	0	0	0	1	0	0	0	0
Otu01560	Bacteria;Bacteroidetes;Bacteroidia;Bacteroidales;Prevotellaceae;unclassified_Prevotellaceae	0	2	2	3	1	0	0	0	1	2	0	0	0	7	0	4	2	0	0	0	2	0	0	1	0	0	2	0	0	0	3	0	0	0	0	3	0	1	2	0	0	0
Otu01561	Bacteria;Bacteroidetes;Bacteroidia;Bacteroidales;Bacteroidaceae;Bacteroides	0	0	0	0	0	0	0	0	0	0	0	0	0	0	0	0	0	0	0	0	0	0	0	0	0	32	0	0	0	0	0	0	0	0	0	0	0	0	0	0	6	0
Otu01562	Bacteria;Firmicutes;Negativicutes;Selenomonadales;Veillonellaceae;Megamonas	0	1	0	0	0	0	0	0	0	0	0	0	0	0	3	0	0	0	0	0	0	5	0	0	2	2	3	0	0	0	0	0	0	3	0	1	0	2	14	2	0	0
Otu01563	Bacteria;Bacteroidetes;Bacteroidia;Bacteroidales;Prevotellaceae;Prevotella	0	0	0	0	0	0	0	0	0	11	0	0	9	15	0	0	0	0	0	0	0	0	0	0	0	0	0	0	0	0	0	0	0	0	0	0	0	3	0	0	0	0
Otu01564	Bacteria;Firmicutes;Negativicutes;Selenomonadales;Veillonellaceae;Dialister	0	1	0	0	0	0	0	1	0	0	0	0	0	0	0	0	2	0	0	0	0	0	4	0	0	0	0	0	3	10	0	0	0	12	0	0	5	0	0	0	0	0
Otu01565	Bacteria;Candidatus Saccharibacteria;;;;Saccharibacteria_genera_incertae_sedis	0	0	0	0	0	0	0	0	0	2	0	0	0	1	2	0	1	0	0	0	0	0	1	3	0	1	0	0	3	4	0	1	3	1	3	1	6	0	0	0	2	2
Otu01566	Bacteria;Firmicutes;Negativicutes;Selenomonadales;Acidaminococcaceae;Phascolarctobacterium	0	0	0	0	0	5	2	2	0	0	0	0	0	0	0	0	0	0	1	0	0	0	0	0	0	0	0	0	0	0	0	0	0	0	11	0	0	0	0	0	0	16
Otu01567	Bacteria;Firmicutes;Clostridia;Clostridiales;Ruminococcaceae;unclassified_Ruminococcaceae	0	0	0	0	0	2	0	1	2	6	8	0	1	4	1	6	0	1	5	0	0	0	0	0	0	0	0	0	0	0	0	0	0	0	0	0	0	0	0	0	0	0
Otu01568	Bacteria;Bacteroidetes;Bacteroidia;Bacteroidales;Bacteroidaceae;Bacteroides	12	0	0	0	0	0	0	1	0	0	0	6	0	0	0	0	0	0	11	0	0	0	0	0	0	0	0	0	0	1	0	0	0	0	4	0	0	0	0	0	2	0
Otu01569	Bacteria;Firmicutes;Clostridia;Clostridiales;Lachnospiraceae;unclassified_Lachnospiraceae	0	0	5	0	0	4	1	12	0	0	0	0	0	0	0	0	0	3	0	1	3	0	0	0	0	0	0	3	0	0	0	0	1	1	3	0	0	0	0	0	0	0
Otu01570	Bacteria;Firmicutes;Clostridia;Clostridiales;Ruminococcaceae;unclassified_Ruminococcaceae	0	0	0	0	0	1	0	0	2	0	0	0	0	26	0	5	0	0	0	0	0	0	0	0	0	0	0	0	0	0	0	0	0	3	0	0	0	0	0	0	0	0
Otu01571	Bacteria;Firmicutes;Erysipelotrichia;Erysipelotrichales;Erysipelotrichaceae;Solobacterium	2	0	0	0	0	0	0	0	8	3	0	0	0	0	0	0	1	0	0	0	0	0	0	2	0	0	1	0	3	2	0	2	11	0	0	0	1	0	0	0	0	1
Otu01572	Bacteria;Firmicutes;Clostridia;Clostridiales;Lachnospiraceae;unclassified_Lachnospiraceae	0	0	1	1	1	7	0	9	5	0	0	0	2	1	0	2	0	1	0	5	0	0	0	0	0	0	0	0	0	0	0	0	1	1	0	0	0	0	0	0	0	0
Otu01573	Bacteria;Firmicutes;Clostridia;Clostridiales;Ruminococcaceae;unclassified_Ruminococcaceae	0	0	0	1	2	5	0	3	3	5	3	0	2	2	1	4	0	0	2	1	0	0	0	0	0	0	0	0	0	0	0	0	0	2	0	0	1	0	0	0	0	0
Otu01574	Bacteria;Bacteroidetes;Bacteroidia;Bacteroidales;Bacteroidaceae;Bacteroides	0	0	0	0	0	6	0	21	0	0	0	0	0	0	0	0	0	0	0	0	0	0	0	0	0	0	0	0	1	0	0	3	0	6	0	0	0	0	0	0	0	0
Otu01575	Bacteria;Bacteroidetes;Bacteroidia;Bacteroidales;Porphyromonadaceae;Parabacteroides	0	0	0	0	0	0	0	0	0	0	0	0	0	0	0	0	0	0	1	1	12	0	0	0	0	2	0	3	6	0	0	0	0	3	0	0	0	0	0	0	9	0
Otu01576	Bacteria;unclassified_Bacteria;;;;	0	0	0	0	0	0	0	0	0	0	0	0	0	0	0	0	0	0	0	0	0	0	0	0	0	4	0	0	0	0	0	33	0	0	0	0	0	0	0	0	0	0
Otu01577	Bacteria;Firmicutes;Clostridia;Clostridiales;Lachnospiraceae;Lachnospiracea_incertae_sedis	4	1	0	1	0	1	0	0	1	0	0	0	0	1	2	1	1	0	0	0	7	0	1	0	1	0	3	1	3	0	0	0	0	1	1	1	0	0	0	1	2	2
Otu01578	Bacteria;Firmicutes;Clostridia;Clostridiales;Lachnospiraceae;unclassified_Lachnospiraceae	0	0	0	0	0	0	2	1	9	2	0	0	3	0	1	1	1	0	0	1	0	0	0	0	0	0	0	0	1	0	1	0	4	1	2	0	0	0	0	0	0	7
Otu01579	Bacteria;Firmicutes;Clostridia;Clostridiales;Lachnospiraceae;unclassified_Lachnospiraceae	1	0	0	1	0	2	0	4	4	4	0	0	3	5	2	5	0	0	0	3	0	0	0	0	0	0	0	0	0	0	0	0	0	2	0	0	0	0	0	0	0	1
Otu01580	Bacteria;Fusobacteria;Fusobacteriia;Fusobacteriales;Fusobacteriaceae;unclassified_Fusobacteriaceae	0	0	0	0	0	0	0	0	0	0	0	0	0	0	0	0	0	0	0	0	0	37	0	0	0	0	0	0	0	0	0	0	0	0	0	0	0	0	0	0	0	0
Otu01581	Bacteria;Fusobacteria;Fusobacteriia;Fusobacteriales;Fusobacteriaceae;unclassified_Fusobacteriaceae	0	0	0	0	0	0	0	0	0	0	0	0	0	0	0	0	0	0	0	0	0	37	0	0	0	0	0	0	0	0	0	0	0	0	0	0	0	0	0	0	0	0
Otu01582	Bacteria;Firmicutes;Clostridia;Clostridiales;Peptostreptococcaceae;unclassified_Peptostreptococcaceae	0	0	0	1	7	17	0	0	0	0	1	2	0	0	0	1	0	0	3	0	0	4	0	0	0	0	0	0	0	0	0	0	0	1	0	0	0	0	0	0	0	0
Otu01583	Bacteria;Bacteroidetes;Bacteroidia;Bacteroidales;Prevotellaceae;Alloprevotella	0	0	0	0	0	0	0	0	0	0	0	0	0	0	0	0	0	0	0	0	0	0	0	0	0	0	0	0	0	0	0	0	0	0	0	0	37	0	0	0	0	0
Otu01584	Bacteria;Firmicutes;unclassified_Firmicutes;;;	0	0	7	0	0	0	0	0	0	3	1	0	0	0	3	9	0	0	0	0	14	0	0	0	0	0	0	0	0	0	0	0	0	0	0	0	0	0	0	0	0	0
Otu01585	Bacteria;Bacteroidetes;Bacteroidia;Bacteroidales;Bacteroidaceae;Bacteroides	0	0	0	0	0	0	0	0	0	0	0	0	0	0	0	0	0	0	0	0	0	0	0	0	0	23	0	0	0	0	0	0	0	0	0	0	0	0	0	0	14	0
Otu01586	Bacteria;Bacteroidetes;Bacteroidia;Bacteroidales;Prevotellaceae;Prevotella	0	0	0	1	3	0	0	0	2	4	0	0	0	5	0	3	0	2	0	0	0	0	0	0	0	0	0	0	0	0	17	0	0	0	0	0	0	0	0	0	0	0
Otu01587	Bacteria;Bacteroidetes;Bacteroidia;Bacteroidales;Prevotellaceae;Prevotella	0	0	0	20	0	0	0	0	0	6	0	0	0	0	0	0	0	0	0	0	0	0	0	0	0	0	0	0	0	0	11	0	0	0	0	0	0	0	0	0	0	0
Otu01588	Bacteria;Firmicutes;Clostridia;Clostridiales;Lachnospiraceae;unclassified_Lachnospiraceae	0	0	0	0	1	0	0	24	0	1	0	0	0	0	1	6	0	0	2	0	0	0	0	0	0	0	0	0	0	0	0	0	0	2	0	0	0	0	0	0	0	0
Otu01589	Bacteria;Bacteroidetes;Bacteroidia;Bacteroidales;Prevotellaceae;Prevotella	0	0	0	0	0	0	0	0	36	0	0	0	0	1	0	0	0	0	0	0	0	0	0	0	0	0	0	0	0	0	0	0	0	0	0	0	0	0	0	0	0	0
Otu01590	Bacteria;unclassified_Bacteria;;;;	0	0	0	0	0	1	0	0	0	0	0	12	0	0	0	0	0	0	22	0	0	0	0	0	0	0	0	0	0	0	0	0	0	0	2	0	0	0	0	0	0	0
Otu01591	Bacteria;Bacteroidetes;Bacteroidia;Bacteroidales;Prevotellaceae;Prevotella	0	0	0	3	1	0	0	0	0	4	0	0	7	1	15	0	6	0	0	0	0	0	0	0	0	0	0	0	0	0	0	0	0	0	0	0	0	0	0	0	0	0
Otu01592	Bacteria;Actinobacteria;Actinobacteria;Bifidobacteriales;Bifidobacteriaceae;unclassified_Bifidobacteriaceae	0	0	0	0	0	5	0	0	0	0	0	0	0	0	0	0	0	0	32	0	0	0	0	0	0	0	0	0	0	0	0	0	0	0	0	0	0	0	0	0	0	0
Otu01593	Bacteria;Firmicutes;Clostridia;Clostridiales;Lachnospiraceae;Clostridium XlVb	1	0	0	0	0	0	2	0	0	0	0	0	0	0	0	0	0	0	0	0	2	0	0	0	0	0	0	0	0	20	0	11	0	0	1	0	0	0	0	0	0	0
Otu01594	Bacteria;Bacteroidetes;Bacteroidia;Bacteroidales;Prevotellaceae;Prevotella	0	0	2	0	0	0	0	0	0	0	0	0	0	0	0	0	1	0	0	0	0	0	1	3	2	0	4	2	0	0	1	0	0	0	0	6	0	2	5	8	0	0
Otu01595	Bacteria;Firmicutes;Clostridia;Clostridiales;Ruminococcaceae;Faecalibacterium	0	0	0	0	0	0	0	8	2	0	0	0	0	0	2	0	1	0	1	16	0	0	0	0	0	0	0	0	0	0	0	0	0	4	2	0	0	0	0	0	0	0
Otu01596	Bacteria;Firmicutes;Clostridia;Clostridiales;Ruminococcaceae;Gemmiger	1	0	0	0	0	1	0	2	0	1	2	0	0	0	0	4	0	0	0	0	0	0	0	1	0	0	0	0	1	0	0	0	2	16	2	0	0	0	1	0	0	2
Otu01597	Bacteria;Firmicutes;Clostridia;Clostridiales;Lachnospiraceae;unclassified_Lachnospiraceae	8	2	0	2	1	0	0	2	4	0	0	0	0	5	5	1	0	0	0	0	0	0	0	0	0	0	0	0	0	0	1	0	0	0	1	0	1	0	0	0	0	3
Otu01598	Bacteria;Firmicutes;Clostridia;Clostridiales;Ruminococcaceae;unclassified_Ruminococcaceae	0	0	0	0	2	6	0	3	1	1	0	0	1	2	0	19	0	0	1	0	0	0	0	0	0	0	0	0	0	0	0	0	0	0	0	0	0	0	0	0	0	0
Otu01599	Bacteria;Bacteroidetes;Bacteroidia;Bacteroidales;Rikenellaceae;Alistipes	0	5	0	1	0	7	0	5	0	0	0	0	0	0	0	0	0	0	0	3	5	0	0	1	0	0	0	0	0	0	2	0	0	5	0	0	0	0	0	0	0	2
Otu01600	Bacteria;Firmicutes;Clostridia;Clostridiales;Ruminococcaceae;unclassified_Ruminococcaceae	0	0	0	0	3	0	0	0	0	1	24	0	0	2	2	4	0	0	0	0	0	0	0	0	0	0	0	0	0	0	0	0	0	0	0	0	0	0	0	0	0	0
Otu01601	Bacteria;Firmicutes;Clostridia;Clostridiales;Ruminococcaceae;Ruminococcus	0	0	0	0	0	8	0	7	0	0	9	0	0	0	0	0	0	0	12	0	0	0	0	0	0	0	0	0	0	0	0	0	0	0	0	0	0	0	0	0	0	0
Otu01602	Bacteria;Firmicutes;Clostridia;Clostridiales;Lachnospiraceae;Roseburia	0	0	0	0	1	0	0	0	1	2	0	0	9	1	0	3	0	0	0	1	0	0	0	0	0	0	0	0	0	0	0	0	0	17	0	0	1	0	0	0	0	0
Otu01603	Bacteria;Firmicutes;Clostridia;Clostridiales;Lachnospiraceae;unclassified_Lachnospiraceae	1	0	0	0	2	0	1	0	4	1	0	0	2	1	1	0	1	0	0	0	14	1	0	0	0	0	2	0	4	0	0	0	0	0	0	0	0	1	0	0	0	0
Otu01604	Bacteria;Firmicutes;Clostridia;Clostridiales;Lachnospiraceae;Roseburia	9	2	4	0	0	0	0	0	2	0	0	0	0	0	1	2	2	1	0	0	0	0	0	0	0	0	0	0	0	0	0	0	0	4	2	0	1	0	0	0	2	4
Otu01605	Bacteria;Firmicutes;Clostridia;Clostridiales;Lachnospiraceae;Lachnospiracea_incertae_sedis	0	1	0	2	7	0	0	0	0	12	0	0	0	0	2	4	1	0	0	1	0	0	0	0	0	0	1	0	0	2	0	0	0	0	1	0	0	0	0	0	0	2
Otu01606	Bacteria;Firmicutes;Clostridia;Clostridiales;Lachnospiraceae;Lachnospiracea_incertae_sedis	0	0	0	0	13	0	0	2	0	0	0	2	0	0	2	11	0	0	0	0	0	0	0	0	0	0	0	0	1	0	0	0	1	1	1	0	0	1	0	0	0	1
Otu01607	Bacteria;Firmicutes;Clostridia;Clostridiales;Ruminococcaceae;unclassified_Ruminococcaceae	0	32	0	0	3	0	0	0	0	0	0	0	0	0	0	1	0	0	0	0	0	0	0	0	0	0	0	0	0	0	0	0	0	0	0	0	0	0	0	0	0	0
Otu01608	Bacteria;Proteobacteria;Deltaproteobacteria;Desulfovibrionales;Desulfovibrionaceae;Bilophila	3	0	0	0	1	3	0	2	1	1	0	6	0	0	1	1	0	1	3	1	10	0	0	0	0	0	0	0	0	1	0	0	0	1	0	0	0	0	0	0	0	0
Otu01609	Bacteria;Firmicutes;Clostridia;Clostridiales;Ruminococcaceae;Faecalibacterium	0	0	3	0	1	1	0	0	1	0	0	0	21	0	0	0	0	9	0	0	0	0	0	0	0	0	0	0	0	0	0	0	0	0	0	0	0	0	0	0	0	0
Otu01610	Bacteria;Verrucomicrobia;Verrucomicrobiae;Verrucomicrobiales;Verrucomicrobiaceae;Akkermansia	0	0	0	0	0	0	0	0	0	0	36	0	0	0	0	0	0	0	0	0	0	0	0	0	0	0	0	0	0	0	0	0	0	0	0	0	0	0	0	0	0	0
Otu01611	Bacteria;Firmicutes;Clostridia;Clostridiales;Lachnospiraceae;unclassified_Lachnospiraceae	1	4	0	0	3	2	0	4	5	1	0	0	1	0	2	1	0	2	0	2	0	0	0	0	0	0	0	0	0	0	1	0	2	4	0	0	0	0	0	0	0	1
Otu01612	Bacteria;Firmicutes;Clostridia;Clostridiales;unclassified_Clostridiales;	0	0	0	0	2	2	0	0	0	0	30	0	0	2	0	0	0	0	0	0	0	0	0	0	0	0	0	0	0	0	0	0	0	0	0	0	0	0	0	0	0	0
Otu01613	Bacteria;Firmicutes;unclassified_Firmicutes;;;	0	0	0	0	0	0	0	10	0	0	0	0	0	2	0	0	0	0	0	0	0	0	0	0	0	0	0	0	0	0	0	0	0	0	24	0	0	0	0	0	0	0
Otu01614	Bacteria;Firmicutes;Clostridia;Clostridiales;unclassified_Clostridiales;	0	0	0	0	0	0	0	0	0	0	31	0	0	4	0	1	0	0	0	0	0	0	0	0	0	0	0	0	0	0	0	0	0	0	0	0	0	0	0	0	0	0
Otu01615	Bacteria;unclassified_Bacteria;;;;	0	0	0	0	0	4	23	1	0	0	0	0	0	0	0	0	0	0	0	0	0	0	0	0	0	0	0	0	0	6	0	0	0	0	2	0	0	0	0	0	0	0
Otu01616	Bacteria;Firmicutes;Clostridia;Clostridiales;Lachnospiraceae;unclassified_Lachnospiraceae	22	0	0	0	0	0	0	0	0	0	0	2	0	0	0	0	0	0	2	0	8	0	0	0	0	0	0	0	0	0	0	1	0	1	0	0	0	0	0	0	0	0
Otu01617	Bacteria;Firmicutes;Clostridia;Clostridiales;Lachnospiraceae;Lachnospiracea_incertae_sedis	3	2	3	0	0	4	2	0	1	0	0	0	1	1	1	5	0	1	1	0	0	0	1	0	0	0	0	1	0	1	3	0	0	1	3	0	0	0	0	1	0	0
Otu01618	Bacteria;Bacteroidetes;Bacteroidia;Bacteroidales;Prevotellaceae;Paraprevotella	0	4	0	0	0	0	13	4	2	0	0	0	0	0	0	0	0	0	0	0	0	0	0	0	9	0	0	0	0	0	1	3	0	0	0	0	0	0	0	0	0	0
Otu01619	Bacteria;Firmicutes;Clostridia;Clostridiales;Lachnospiraceae;unclassified_Lachnospiraceae	2	1	1	1	0	0	6	3	1	0	0	0	0	0	3	2	0	0	0	1	0	0	1	0	1	0	0	0	0	0	0	0	0	0	1	0	0	0	0	0	10	2
Otu01620	Bacteria;Firmicutes;Clostridia;Clostridiales;Lachnospiraceae;unclassified_Lachnospiraceae	0	0	0	0	0	0	0	0	0	0	0	0	0	0	0	0	0	0	0	16	0	0	0	0	0	0	0	0	20	0	0	0	0	0	0	0	0	0	0	0	0	0
Otu01621	Bacteria;Elusimicrobia;Elusimicrobia;Elusimicrobiales;Elusimicrobiaceae;Elusimicrobium	0	0	0	0	0	0	0	0	0	0	0	0	0	0	0	0	0	0	0	0	0	0	0	0	0	0	0	0	0	0	0	0	0	36	0	0	0	0	0	0	0	0
Otu01622	Bacteria;Firmicutes;Negativicutes;Selenomonadales;Veillonellaceae;Megamonas	0	0	0	0	0	0	0	0	0	0	0	0	0	0	0	0	1	0	0	0	0	0	0	2	0	0	0	0	0	0	0	0	0	2	0	21	0	0	0	10	0	0
Otu01623	Bacteria;Bacteroidetes;Bacteroidia;Bacteroidales;Bacteroidaceae;Bacteroides	0	0	0	0	0	0	0	0	0	0	0	0	0	0	1	0	0	0	0	0	20	0	0	0	0	0	0	0	15	0	0	0	0	0	0	0	0	0	0	0	0	0
Otu01624	Bacteria;Bacteroidetes;Bacteroidia;Bacteroidales;Prevotellaceae;Prevotella	0	0	0	0	0	0	0	0	0	0	0	0	0	0	0	0	0	0	0	0	0	0	0	0	0	0	0	0	0	0	0	0	0	0	0	0	0	36	0	0	0	0
Otu01625	Bacteria;Firmicutes;Negativicutes;Selenomonadales;Veillonellaceae;Megamonas	0	0	0	0	0	0	0	0	0	0	0	0	0	0	0	0	36	0	0	0	0	0	0	0	0	0	0	0	0	0	0	0	0	0	0	0	0	0	0	0	0	0
Otu01626	Bacteria;Firmicutes;Clostridia;Clostridiales;Lachnospiraceae;unclassified_Lachnospiraceae	7	2	0	0	1	2	0	7	2	0	0	0	0	0	2	2	0	2	0	0	0	0	0	0	0	0	0	0	0	0	0	0	2	0	7	0	0	0	0	0	0	0
Otu01627	Bacteria;Firmicutes;Erysipelotrichia;Erysipelotrichales;Erysipelotrichaceae;Holdemanella	0	0	0	0	0	0	0	0	3	0	3	0	0	1	8	3	1	0	0	1	16	0	0	0	0	0	0	0	0	0	0	0	0	0	0	0	0	0	0	0	0	0
Otu01628	Bacteria;Bacteroidetes;Bacteroidia;Bacteroidales;Prevotellaceae;Prevotella	0	0	0	1	0	0	0	0	0	3	0	0	0	0	1	0	1	0	0	0	0	0	0	4	1	0	2	0	0	0	0	0	0	0	0	0	0	6	0	0	0	17
Otu01629	Bacteria;Bacteroidetes;Bacteroidia;Bacteroidales;Prevotellaceae;Prevotella	0	0	0	22	1	0	0	0	0	2	0	0	0	0	0	0	0	0	0	0	0	0	0	0	0	0	0	0	0	0	11	0	0	0	0	0	0	0	0	0	0	0
Otu01630	Bacteria;Bacteroidetes;Bacteroidia;Bacteroidales;Prevotellaceae;Prevotella	0	0	0	0	1	0	0	0	0	4	0	0	0	3	0	0	0	0	0	0	0	0	0	0	0	0	0	0	0	0	0	0	0	0	0	0	0	28	0	0	0	0
Otu01631	Bacteria;Proteobacteria;unclassified_Proteobacteria;;;	0	0	0	0	0	0	0	0	0	14	0	0	0	0	0	0	0	0	0	0	0	0	0	18	0	0	0	0	0	0	3	0	0	0	0	0	1	0	0	0	0	0
Otu01632	Bacteria;unclassified_Bacteria;;;;	0	0	0	0	0	0	0	0	0	0	0	0	0	0	0	0	0	0	0	0	0	36	0	0	0	0	0	0	0	0	0	0	0	0	0	0	0	0	0	0	0	0
Otu01633	Bacteria;Bacteroidetes;Bacteroidia;Bacteroidales;unclassified_Bacteroidales;	0	24	0	0	6	0	0	0	0	0	0	0	5	0	0	0	1	0	0	0	0	0	0	0	0	0	0	0	0	0	0	0	0	0	0	0	0	0	0	0	0	0
Otu01634	Bacteria;Firmicutes;Bacilli;Lactobacillales;Carnobacteriaceae;Granulicatella	0	1	0	0	0	0	0	0	0	0	0	0	1	0	1	1	3	3	0	0	0	0	0	1	1	0	0	1	5	0	0	2	12	0	2	0	0	0	0	0	1	0
Otu01635	Bacteria;Firmicutes;Clostridia;Clostridiales;Lachnospiraceae;unclassified_Lachnospiraceae	0	0	0	0	0	0	0	0	0	1	0	31	0	2	0	0	0	0	0	0	0	0	0	0	0	0	0	0	0	0	0	0	0	1	0	0	0	0	0	0	0	0
Otu01636	Bacteria;unclassified_Bacteria;;;;	0	1	0	0	1	0	0	13	0	0	0	1	0	0	0	5	0	0	0	0	0	0	0	0	0	0	0	2	0	6	0	0	0	0	0	0	6	0	0	0	0	0
Otu01637	Bacteria;Firmicutes;Clostridia;Clostridiales;unclassified_Clostridiales;	0	0	0	0	1	0	0	2	1	0	0	10	0	1	0	0	0	1	4	2	0	0	0	0	0	0	0	0	1	0	0	0	0	11	0	0	1	0	0	0	0	0
Otu01638	Bacteria;Bacteroidetes;Bacteroidia;Bacteroidales;Porphyromonadaceae;Butyricimonas	0	17	2	0	0	0	0	5	2	0	0	0	0	0	0	1	0	0	0	0	0	0	0	0	0	0	0	6	0	0	1	1	0	0	0	0	0	0	0	0	0	0
Otu01639	Bacteria;unclassified_Bacteria;;;;	0	0	0	0	7	2	0	0	3	3	1	0	3	3	0	5	1	0	5	2	0	0	0	0	0	0	0	0	0	0	0	0	0	0	0	0	0	0	0	0	0	0
Otu01640	Bacteria;Bacteroidetes;Bacteroidia;Bacteroidales;Prevotellaceae;Prevotella	0	0	0	0	0	0	0	0	1	0	0	0	0	1	0	32	0	0	0	0	0	0	0	0	0	0	0	0	0	0	0	0	0	0	0	0	0	0	0	0	1	0
Otu01641	Bacteria;Firmicutes;Clostridia;Clostridiales;Ruminococcaceae;Faecalibacterium	1	2	2	0	0	0	4	0	3	0	0	0	1	1	1	2	0	2	0	3	2	0	0	0	0	0	0	0	0	1	0	0	4	1	1	0	1	0	0	0	0	3
Otu01642	Bacteria;Firmicutes;Clostridia;Clostridiales;Ruminococcaceae;Oscillibacter	0	0	0	1	5	2	0	4	1	3	2	2	1	1	0	9	0	0	3	0	0	0	0	0	0	0	0	0	0	0	1	0	0	0	0	0	0	0	0	0	0	0
Otu01643	Bacteria;Firmicutes;unclassified_Firmicutes;;;	0	0	0	0	0	0	0	0	0	0	0	0	0	0	0	0	0	0	7	0	0	0	0	0	0	0	0	0	0	0	0	0	28	0	0	0	0	0	0	0	0	0
Otu01644	Bacteria;Firmicutes;Clostridia;Clostridiales;Lachnospiraceae;unclassified_Lachnospiraceae	5	0	0	1	1	0	0	3	1	1	0	0	0	4	8	3	0	0	0	0	4	0	0	1	0	0	0	1	0	0	1	0	0	0	1	0	0	0	0	0	0	0
Otu01645	Bacteria;Firmicutes;Clostridia;Clostridiales;Lachnospiraceae;unclassified_Lachnospiraceae	0	0	0	0	1	4	9	2	3	0	0	0	1	0	0	5	0	0	0	1	0	0	0	0	0	0	0	1	0	4	0	0	3	1	0	0	0	0	0	0	0	0
Otu01646	Bacteria;Bacteroidetes;Bacteroidia;Bacteroidales;unclassified_Bacteroidales;	0	0	0	0	1	0	0	0	1	0	0	0	3	1	19	1	0	0	0	0	4	0	0	0	2	0	0	0	0	0	0	0	0	2	0	0	0	1	0	0	0	0
Otu01647	Bacteria;unclassified_Bacteria;;;;	0	5	4	0	2	0	0	0	0	7	0	0	2	6	1	0	1	0	0	0	1	0	0	0	0	0	2	2	0	0	1	0	0	0	0	0	0	0	0	0	0	1
Otu01648	Bacteria;Firmicutes;Clostridia;Clostridiales;Lachnospiraceae;unclassified_Lachnospiraceae	0	0	0	0	0	0	0	0	0	0	0	0	0	0	0	0	0	0	0	0	0	0	0	0	0	0	0	0	0	35	0	0	0	0	0	0	0	0	0	0	0	0
Otu01649	Bacteria;Firmicutes;Clostridia;Clostridiales;Lachnospiraceae;unclassified_Lachnospiraceae	8	0	0	0	1	2	0	4	5	0	1	0	3	0	1	0	0	2	0	2	1	0	0	0	0	0	0	0	0	0	0	0	0	2	3	0	0	0	0	0	0	0
Otu01650	Bacteria;Firmicutes;Clostridia;Clostridiales;Lachnospiraceae;unclassified_Lachnospiraceae	0	0	0	1	5	5	0	0	6	1	0	3	0	0	0	3	0	0	0	0	0	0	0	0	0	0	0	0	1	0	0	9	0	1	0	0	0	0	0	0	0	0
Otu01651	Bacteria;Bacteroidetes;Bacteroidia;Bacteroidales;unclassified_Bacteroidales;	0	0	0	0	0	0	0	0	0	0	5	30	0	0	0	0	0	0	0	0	0	0	0	0	0	0	0	0	0	0	0	0	0	0	0	0	0	0	0	0	0	0
Otu01652	Bacteria;Firmicutes;Clostridia;Clostridiales;Lachnospiraceae;unclassified_Lachnospiraceae	0	0	1	0	0	0	0	0	0	0	0	0	0	0	4	0	5	0	0	0	0	0	2	2	5	0	1	3	0	0	0	0	0	3	0	2	0	0	2	5	0	0
Otu01653	Bacteria;Firmicutes;Clostridia;Clostridiales;Lachnospiraceae;unclassified_Lachnospiraceae	0	1	1	0	2	4	0	6	8	2	0	0	0	0	3	3	2	0	0	1	0	0	0	0	0	0	0	0	0	0	0	0	0	1	0	0	0	0	0	0	0	1
Otu01654	Bacteria;unclassified_Bacteria;;;;	0	0	1	0	0	0	0	0	0	2	0	0	8	2	1	1	1	2	0	0	0	0	0	0	0	0	0	0	0	0	0	0	0	0	0	0	0	2	0	0	0	15
Otu01655	Bacteria;Firmicutes;Negativicutes;Selenomonadales;Veillonellaceae;Megamonas	0	0	0	0	0	0	0	0	0	0	0	0	0	0	1	0	0	0	0	0	0	2	0	3	3	23	0	1	0	0	0	0	0	0	0	0	0	0	1	1	0	0
Otu01656	Bacteria;Bacteroidetes;Bacteroidia;Bacteroidales;Prevotellaceae;Prevotella	0	0	0	0	0	0	0	0	0	0	0	0	4	7	11	1	12	0	0	0	0	0	0	0	0	0	0	0	0	0	0	0	0	0	0	0	0	0	0	0	0	0
Otu01657	Bacteria;Firmicutes;Clostridia;Clostridiales;Lachnospiraceae;unclassified_Lachnospiraceae	0	0	0	0	0	0	0	0	0	0	0	0	0	0	0	0	0	0	0	0	0	0	0	0	0	0	0	0	0	35	0	0	0	0	0	0	0	0	0	0	0	0
Otu01658	Bacteria;Firmicutes;Clostridia;Clostridiales;Lachnospiraceae;unclassified_Lachnospiraceae	0	0	1	1	1	0	1	1	7	0	0	0	1	2	0	7	0	0	0	1	4	0	0	0	0	0	1	1	1	0	1	0	1	0	0	0	0	0	1	0	0	2
Otu01659	Bacteria;Bacteroidetes;Bacteroidia;Bacteroidales;Bacteroidaceae;Bacteroides	0	0	0	0	0	0	0	0	0	0	0	0	0	0	0	0	0	0	0	0	0	0	0	0	0	0	0	0	0	0	0	0	0	0	0	0	35	0	0	0	0	0
Otu01660	Bacteria;Bacteroidetes;Bacteroidia;Bacteroidales;Rikenellaceae;Alistipes	0	0	0	0	0	1	0	0	0	0	0	33	0	0	0	0	0	0	0	0	0	0	0	0	0	0	0	0	0	0	0	0	0	1	0	0	0	0	0	0	0	0
Otu01661	Bacteria;Firmicutes;Clostridia;Clostridiales;Ruminococcaceae;Ruminococcus	0	0	0	0	0	0	0	0	0	0	0	0	0	3	0	0	0	0	0	32	0	0	0	0	0	0	0	0	0	0	0	0	0	0	0	0	0	0	0	0	0	0
Otu01662	Bacteria;Firmicutes;Erysipelotrichia;Erysipelotrichales;Erysipelotrichaceae;Holdemanella	0	5	0	0	0	0	0	0	5	0	0	0	0	3	8	1	0	0	0	0	13	0	0	0	0	0	0	0	0	0	0	0	0	0	0	0	0	0	0	0	0	0
Otu01663	Bacteria;Firmicutes;Clostridia;Clostridiales;Lachnospiraceae;unclassified_Lachnospiraceae	0	0	0	0	0	0	0	0	0	0	0	0	0	0	0	0	0	0	0	0	0	35	0	0	0	0	0	0	0	0	0	0	0	0	0	0	0	0	0	0	0	0
Otu01664	Bacteria;Firmicutes;Clostridia;Clostridiales;Ruminococcaceae;Ruminococcus	0	0	2	0	1	0	0	0	0	0	0	0	32	0	0	0	0	0	0	0	0	0	0	0	0	0	0	0	0	0	0	0	0	0	0	0	0	0	0	0	0	0
Otu01665	Bacteria;Firmicutes;Negativicutes;Selenomonadales;Veillonellaceae;unclassified_Veillonellaceae	0	0	0	0	0	0	0	0	0	0	0	0	0	0	0	0	0	0	0	0	0	0	23	0	0	0	0	0	0	0	0	0	0	0	0	0	0	12	0	0	0	0
Otu01666	Bacteria;Firmicutes;Clostridia;Clostridiales;Lachnospiraceae;unclassified_Lachnospiraceae	0	0	0	0	2	12	0	12	2	0	0	0	0	0	3	1	0	0	0	2	0	0	0	0	0	0	0	0	0	0	1	0	0	0	0	0	0	0	0	0	0	0
Otu01667	Bacteria;Firmicutes;Clostridia;Clostridiales;Lachnospiraceae;unclassified_Lachnospiraceae	0	2	0	0	0	4	6	4	0	1	0	0	0	0	0	0	0	0	0	3	0	0	0	0	0	0	0	0	0	1	0	0	5	0	8	0	0	0	0	0	1	0
Otu01668	Bacteria;Firmicutes;Clostridia;Clostridiales;Ruminococcaceae;Ruminococcus	0	0	0	0	3	0	0	14	0	0	0	0	0	0	5	0	0	0	1	11	0	0	0	0	0	0	0	0	0	0	0	0	0	0	0	0	0	0	1	0	0	0
Otu01669	Bacteria;Firmicutes;Clostridia;Clostridiales;Ruminococcaceae;unclassified_Ruminococcaceae	0	0	0	0	0	0	0	0	0	1	7	24	0	0	0	0	0	0	1	0	0	0	0	0	0	0	0	0	0	0	0	0	0	1	0	0	0	0	0	0	0	0
Otu01670	Bacteria;Firmicutes;Clostridia;Clostridiales;Ruminococcaceae;Faecalibacterium	0	0	0	0	0	2	0	14	0	0	0	0	0	0	0	0	0	0	2	16	0	0	0	0	0	0	0	0	0	0	0	0	0	0	0	0	0	0	0	0	0	0
Otu01671	Bacteria;Firmicutes;Clostridia;Clostridiales;Clostridiales_Incertae Sedis XI;Ezakiella	0	0	0	0	0	0	0	0	11	0	0	23	0	0	0	0	0	0	0	0	0	0	0	0	0	0	0	0	0	0	0	0	0	0	0	0	0	0	0	0	0	0
Otu01672	Bacteria;Bacteroidetes;Bacteroidia;Bacteroidales;Rikenellaceae;Alistipes	0	0	0	0	0	18	0	6	1	0	0	0	0	0	0	0	0	0	0	0	0	0	0	0	0	0	0	0	0	0	0	0	0	8	0	0	0	0	0	0	0	1
Otu01673	Bacteria;Firmicutes;Clostridia;Clostridiales;Peptoniphilaceae;Peptoniphilus	0	0	0	0	0	0	0	0	19	0	0	12	0	0	0	2	0	0	0	0	0	0	0	0	0	0	0	0	0	1	0	0	0	0	0	0	0	0	0	0	0	0
Otu01674	Bacteria;Firmicutes;Clostridia;Clostridiales;Ruminococcaceae;Ruminococcus	0	0	0	0	0	0	0	19	0	0	0	0	4	1	0	0	0	0	0	0	0	0	0	0	0	0	0	0	0	0	0	0	1	6	2	0	0	0	0	0	0	1
Otu01675	Bacteria;Firmicutes;Clostridia;Clostridiales;Ruminococcaceae;unclassified_Ruminococcaceae	0	0	0	0	0	0	0	0	19	3	0	0	3	1	0	1	0	2	0	5	0	0	0	0	0	0	0	0	0	0	0	0	0	0	0	0	0	0	0	0	0	0
Otu01676	Bacteria;Firmicutes;Clostridia;Clostridiales;Lachnospiraceae;Dorea	0	0	1	0	1	0	0	0	0	1	0	0	0	0	0	2	0	0	2	0	0	11	0	0	0	1	0	0	1	1	0	9	0	4	0	0	0	0	0	0	0	0
Otu01677	Bacteria;Firmicutes;Clostridia;Clostridiales;Ruminococcaceae;unclassified_Ruminococcaceae	0	0	0	3	0	0	0	3	4	2	0	0	0	0	2	6	0	0	0	1	0	0	0	0	0	0	0	0	0	0	2	0	0	9	0	0	0	0	0	0	0	2
Otu01678	Bacteria;Firmicutes;Negativicutes;Selenomonadales;Acidaminococcaceae;Phascolarctobacterium	0	0	0	0	0	4	3	1	0	0	0	1	0	0	0	0	0	0	1	0	0	0	0	0	0	0	0	0	0	0	0	17	0	0	6	0	0	0	0	0	0	1
Otu01679	Bacteria;Bacteroidetes;Bacteroidia;Bacteroidales;Rikenellaceae;unclassified_Rikenellaceae	0	0	0	0	0	1	0	5	0	0	15	1	0	0	0	0	0	0	12	0	0	0	0	0	0	0	0	0	0	0	0	0	0	0	0	0	0	0	0	0	0	0
Otu01680	Bacteria;Firmicutes;Clostridia;Clostridiales;Lachnospiraceae;Lachnospiracea_incertae_sedis	0	2	0	0	0	0	0	2	2	5	0	3	0	0	3	8	1	0	0	1	0	0	0	0	0	0	0	0	0	1	4	0	0	1	0	0	1	0	0	0	0	0
Otu01681	Bacteria;Firmicutes;Erysipelotrichia;Erysipelotrichales;Erysipelotrichaceae;unclassified_Erysipelotrichaceae	8	1	0	0	0	0	0	1	0	1	0	0	0	0	0	3	0	0	13	0	1	0	0	0	0	0	0	0	0	0	0	0	0	6	0	0	0	0	0	0	0	0
Otu01682	Bacteria;Firmicutes;Bacilli;Lactobacillales;Streptococcaceae;Streptococcus	0	1	0	0	0	0	0	0	1	0	0	0	0	0	0	0	0	8	15	0	0	0	0	0	0	0	0	0	0	2	0	1	2	2	1	0	0	0	0	1	0	0
Otu01683	Bacteria;unclassified_Bacteria;;;;	0	0	0	0	0	0	0	0	0	0	0	0	0	0	1	0	0	0	0	15	0	0	0	0	0	0	0	0	0	0	0	0	0	0	0	0	1	0	0	4	13	0
Otu01684	Bacteria;Firmicutes;Negativicutes;Selenomonadales;Veillonellaceae;Megamonas	0	0	0	0	0	0	0	0	0	0	0	0	0	0	0	1	0	0	0	0	0	17	0	1	4	0	0	5	0	0	0	0	0	1	0	0	0	2	2	1	0	0
Otu01685	Bacteria;Firmicutes;Clostridia;Clostridiales;Lachnospiraceae;Ruminococcus2	0	0	1	1	0	0	0	0	0	0	0	0	0	0	0	10	0	0	1	0	2	0	0	0	1	0	6	0	0	0	0	0	0	0	0	0	0	0	4	8	0	0
Otu01686	Bacteria;Firmicutes;unclassified_Firmicutes;;;	0	1	2	0	0	0	0	0	0	0	0	0	0	0	1	1	0	0	0	0	0	0	0	1	0	0	0	26	0	0	0	0	0	0	0	2	0	0	0	0	0	0
Otu01687	Bacteria;Firmicutes;Clostridia;Clostridiales;Lachnospiraceae;unclassified_Lachnospiraceae	0	0	0	0	3	4	0	13	0	0	1	0	0	3	3	1	0	0	0	6	0	0	0	0	0	0	0	0	0	0	0	0	0	0	0	0	0	0	0	0	0	0
Otu01688	Bacteria;Firmicutes;unclassified_Firmicutes;;;	0	0	0	0	0	0	0	0	0	0	0	0	0	0	5	2	0	0	1	0	0	0	0	1	2	0	18	1	0	0	0	0	4	0	0	0	0	0	0	0	0	0
Otu01689	Bacteria;Firmicutes;Clostridia;Clostridiales;Lachnospiraceae;unclassified_Lachnospiraceae	0	0	0	0	22	4	0	2	0	6	0	0	0	0	0	0	0	0	0	0	0	0	0	0	0	0	0	0	0	0	0	0	0	0	0	0	0	0	0	0	0	0
Otu01690	Bacteria;Firmicutes;Negativicutes;Selenomonadales;Veillonellaceae;Megamonas	0	1	5	0	0	0	0	0	0	0	0	0	0	0	3	1	3	0	0	0	0	0	0	3	0	0	0	1	0	0	1	0	1	1	0	10	0	0	0	4	0	0
Otu01691	Bacteria;Bacteroidetes;Bacteroidia;Bacteroidales;Prevotellaceae;Prevotella	0	0	0	5	1	0	0	0	0	0	0	0	2	3	0	0	4	1	0	0	0	0	0	0	7	0	0	0	0	0	1	0	0	0	0	0	0	10	0	0	0	0
Otu01692	Bacteria;Bacteroidetes;Bacteroidia;Bacteroidales;Bacteroidaceae;Bacteroides	0	0	0	0	0	0	0	0	0	0	0	0	0	0	0	0	0	0	0	1	0	0	1	0	0	1	0	0	25	0	0	0	0	0	0	0	0	0	0	3	3	0
Otu01693	Bacteria;Bacteroidetes;Bacteroidia;Bacteroidales;Bacteroidaceae;Bacteroides	0	0	0	0	0	0	0	0	0	0	0	0	0	0	0	0	0	0	0	5	0	0	0	0	0	2	0	0	25	0	0	0	0	0	0	0	0	0	0	0	2	0
Otu01694	Bacteria;Bacteroidetes;Bacteroidia;Bacteroidales;Rikenellaceae;Alistipes	0	0	0	0	0	0	0	1	0	0	0	33	0	0	0	0	0	0	0	0	0	0	0	0	0	0	0	0	0	0	0	0	0	0	0	0	0	0	0	0	0	0
Otu01695	Bacteria;Bacteroidetes;Bacteroidia;Bacteroidales;Prevotellaceae;Prevotella	0	5	0	0	0	0	0	0	0	2	0	0	0	1	0	0	1	0	0	0	1	0	0	2	0	0	0	0	0	0	1	0	0	0	0	0	0	4	2	3	0	12
Otu01696	Bacteria;Bacteroidetes;Bacteroidia;Bacteroidales;Prevotellaceae;Prevotella	0	0	0	9	5	0	0	0	0	3	0	0	3	4	0	0	10	0	0	0	0	0	0	0	0	0	0	0	0	0	0	0	0	0	0	0	0	0	0	0	0	0
Otu01697	Bacteria;unclassified_Bacteria;;;;	0	0	0	0	0	0	0	0	0	0	0	0	0	0	0	0	0	0	0	0	0	0	0	0	0	34	0	0	0	0	0	0	0	0	0	0	0	0	0	0	0	0
Otu01698	Bacteria;unclassified_Bacteria;;;;	0	0	0	0	0	0	0	0	0	0	0	0	0	0	0	0	0	0	0	0	0	0	0	4	0	30	0	0	0	0	0	0	0	0	0	0	0	0	0	0	0	0
Otu01699	Bacteria;Bacteroidetes;Bacteroidia;Bacteroidales;unclassified_Bacteroidales;	11	0	0	0	0	0	0	3	0	0	0	0	0	0	0	0	0	0	0	0	1	0	0	0	0	0	0	0	0	0	0	16	0	3	0	0	0	0	0	0	0	0
Otu01700	Bacteria;Firmicutes;Clostridia;Clostridiales;Lachnospiraceae;unclassified_Lachnospiraceae	0	0	0	0	2	16	1	1	0	0	0	0	0	0	0	0	0	0	0	1	0	0	0	0	0	0	12	0	0	0	0	0	0	0	0	0	0	0	0	0	0	1
Otu01701	Bacteria;Firmicutes;Clostridia;Clostridiales;Lachnospiraceae;unclassified_Lachnospiraceae	1	0	0	1	1	3	0	20	1	0	0	0	0	0	1	1	0	0	1	1	0	0	0	0	0	0	0	0	0	0	1	0	1	0	0	0	0	0	0	0	1	0
Otu01702	Bacteria;Firmicutes;Erysipelotrichia;Erysipelotrichales;Erysipelotrichaceae;Holdemania	0	0	0	0	1	0	0	3	0	0	5	4	0	3	0	0	0	0	7	3	4	0	0	0	0	0	0	0	0	0	0	0	0	1	0	0	0	0	0	0	2	0
Otu01703	Bacteria;Bacteroidetes;Bacteroidia;Bacteroidales;Bacteroidaceae;Bacteroides	4	0	0	0	0	0	0	3	0	0	0	8	0	0	0	0	0	0	5	0	1	0	0	0	0	1	0	0	0	1	0	4	0	0	4	0	1	0	0	0	0	1
Otu01704	Bacteria;Firmicutes;Clostridia;Clostridiales;Ruminococcaceae;Gemmiger	11	0	0	0	0	9	0	0	0	0	0	0	0	0	0	3	0	0	7	0	3	0	0	0	0	0	0	0	0	0	0	0	0	0	0	0	0	0	0	0	0	0
Otu01705	Bacteria;Firmicutes;Clostridia;Clostridiales;Ruminococcaceae;Faecalibacterium	0	0	0	0	0	0	0	0	0	0	0	0	0	0	0	0	0	1	0	0	0	0	0	0	0	0	0	1	0	0	0	0	31	0	0	0	0	0	0	0	0	0
Otu01706	Bacteria;Firmicutes;Clostridia;Clostridiales;Lachnospiraceae;Fusicatenibacter	5	0	0	0	0	0	2	2	1	0	0	0	0	0	0	2	0	0	2	1	0	0	0	0	0	0	0	0	1	0	0	0	0	6	11	0	0	0	0	0	0	0
Otu01707	Bacteria;Firmicutes;Clostridia;Clostridiales;Lachnospiraceae;unclassified_Lachnospiraceae	0	0	0	0	0	0	0	0	0	0	0	0	0	0	0	0	0	0	0	0	0	0	0	0	0	0	0	2	0	0	0	0	31	0	0	0	0	0	0	0	0	0
Otu01708	Bacteria;Firmicutes;Clostridia;Clostridiales;Lachnospiraceae;unclassified_Lachnospiraceae	0	3	0	1	2	0	1	0	1	1	0	0	0	1	1	0	1	0	3	0	13	0	1	1	0	0	0	0	0	0	1	0	0	0	1	0	0	0	0	1	0	0
Otu01709	Bacteria;Firmicutes;unclassified_Firmicutes;;;	0	0	0	0	0	19	0	7	0	0	0	1	0	0	0	0	0	0	6	0	0	0	0	0	0	0	0	0	0	0	0	0	0	0	0	0	0	0	0	0	0	0
Otu01710	Bacteria;Firmicutes;Clostridia;Clostridiales;Lachnospiraceae;unclassified_Lachnospiraceae	0	0	0	0	0	1	3	0	1	1	0	0	0	0	0	1	0	0	0	0	0	0	0	1	0	0	0	0	0	9	13	0	1	0	0	0	2	0	0	0	0	0
Otu01711	Bacteria;Bacteroidetes;Bacteroidia;Bacteroidales;Bacteroidaceae;Bacteroides	0	19	0	0	0	0	0	0	0	0	0	0	0	1	1	6	0	0	0	0	1	0	0	1	0	0	0	1	0	0	0	0	0	0	0	1	0	0	0	0	0	2
Otu01712	Bacteria;Firmicutes;Clostridia;Clostridiales;Ruminococcaceae;Faecalibacterium	0	0	0	0	0	0	0	0	1	0	0	0	0	1	0	0	0	0	0	0	0	0	0	0	0	0	0	0	0	0	0	0	31	0	0	0	0	0	0	0	0	0
Otu01713	Bacteria;Firmicutes;Clostridia;Clostridiales;Lachnospiraceae;Lachnospiracea_incertae_sedis	0	0	0	2	1	1	0	2	4	1	0	0	1	0	2	2	0	0	1	1	1	0	0	0	0	0	0	0	0	7	0	0	1	1	3	0	0	1	0	0	1	0
Otu01714	Bacteria;Firmicutes;Clostridia;Clostridiales;Lachnospiraceae;unclassified_Lachnospiraceae	0	0	0	0	0	1	0	2	6	4	0	0	0	5	1	0	0	2	0	2	0	0	0	0	0	0	0	0	2	1	1	0	0	2	0	0	0	0	0	0	0	4
Otu01715	Bacteria;Firmicutes;Clostridia;Clostridiales;Ruminococcaceae;Gemmiger	3	0	2	1	2	13	0	1	0	1	0	0	0	0	0	3	0	0	1	0	4	0	0	0	0	0	0	0	0	0	0	0	0	0	1	0	0	0	1	0	0	0
Otu01716	Bacteria;Fusobacteria;Fusobacteriia;Fusobacteriales;Fusobacteriaceae;unclassified_Fusobacteriaceae	0	0	0	0	3	0	0	0	0	0	0	0	0	0	0	0	0	0	0	0	0	0	0	0	0	0	30	0	0	0	0	0	0	0	0	0	0	0	0	0	0	0
Otu01717	Bacteria;Firmicutes;Clostridia;Clostridiales;Lachnospiraceae;unclassified_Lachnospiraceae	0	0	0	0	0	1	4	1	0	1	0	0	0	2	2	3	0	0	0	4	2	0	0	0	0	0	1	0	3	2	0	0	1	1	2	0	1	0	0	0	0	2
Otu01718	Bacteria;Firmicutes;Clostridia;Clostridiales;Ruminococcaceae;unclassified_Ruminococcaceae	1	1	0	2	0	2	0	1	1	1	1	0	1	2	1	4	0	0	6	2	0	0	0	0	0	0	0	0	0	0	0	0	0	7	0	0	0	0	0	0	0	0
Otu01719	Bacteria;Firmicutes;Clostridia;Clostridiales;Lachnospiraceae;unclassified_Lachnospiraceae	0	0	0	2	2	0	0	0	0	5	0	0	0	1	8	8	1	0	0	1	0	0	0	0	1	0	0	0	0	0	1	0	0	0	3	0	0	0	0	0	0	0
Otu01720	Bacteria;Firmicutes;unclassified_Firmicutes;;;	14	1	0	0	0	3	0	0	0	0	0	0	0	0	0	1	1	0	5	0	3	0	0	0	0	0	0	0	0	1	0	0	0	4	0	0	0	0	0	0	0	0
Otu01721	Bacteria;Firmicutes;Negativicutes;Selenomonadales;Veillonellaceae;Megamonas	0	0	0	0	0	0	0	0	0	0	0	0	0	0	0	0	2	0	0	0	0	0	0	3	0	0	0	0	0	0	0	0	0	0	0	18	0	0	0	10	0	0
Otu01722	Bacteria;Firmicutes;Clostridia;Clostridiales;Lachnospiraceae;unclassified_Lachnospiraceae	0	1	0	0	3	2	0	4	4	5	0	0	0	1	1	3	1	1	0	0	0	0	0	0	1	0	0	1	0	0	0	0	0	5	0	0	0	0	0	0	0	0
Otu01723	Bacteria;Firmicutes;Clostridia;Clostridiales;Lachnospiraceae;Coprococcus	0	0	0	0	0	0	0	0	9	0	0	0	0	0	0	1	0	6	0	1	0	0	0	0	0	0	0	0	0	0	0	0	0	15	0	0	0	1	0	0	0	0
Otu01724	Bacteria;unclassified_Bacteria;;;;	0	7	0	0	7	0	0	0	0	0	0	0	0	6	5	0	4	1	0	0	0	0	0	0	0	0	0	0	0	0	0	0	0	0	0	0	0	2	0	1	0	0
Otu01725	Bacteria;Fusobacteria;Fusobacteriia;Fusobacteriales;Fusobacteriaceae;unclassified_Fusobacteriaceae	0	0	0	0	0	0	0	0	0	0	0	0	0	0	0	0	0	0	0	0	0	33	0	0	0	0	0	0	0	0	0	0	0	0	0	0	0	0	0	0	0	0
Otu01726	Bacteria;Firmicutes;unclassified_Firmicutes;;;	0	0	0	0	0	0	0	0	0	0	0	0	0	0	0	0	0	0	0	0	0	11	0	0	0	21	1	0	0	0	0	0	0	0	0	0	0	0	0	0	0	0
Otu01727	Bacteria;Bacteroidetes;Bacteroidia;Bacteroidales;Prevotellaceae;Prevotella	0	0	0	0	0	0	0	0	0	10	0	0	9	4	0	0	10	0	0	0	0	0	0	0	0	0	0	0	0	0	0	0	0	0	0	0	0	0	0	0	0	0
Otu01728	Bacteria;Bacteroidetes;Bacteroidia;Bacteroidales;Prevotellaceae;Prevotella	0	0	0	0	0	0	0	0	0	28	0	0	0	0	0	0	5	0	0	0	0	0	0	0	0	0	0	0	0	0	0	0	0	0	0	0	0	0	0	0	0	0
Otu01729	Bacteria;Firmicutes;Clostridia;Clostridiales;Lachnospiraceae;Coprococcus	0	0	0	0	0	0	0	0	0	0	0	0	0	0	0	2	1	0	0	0	0	0	0	0	8	0	0	0	0	0	2	0	0	18	0	0	0	2	0	0	0	0
Otu01730	Bacteria;Bacteroidetes;Bacteroidia;Bacteroidales;unclassified_Bacteroidales;	0	0	0	0	0	0	0	0	0	0	0	0	0	0	0	0	0	0	0	0	0	0	5	0	0	0	0	0	14	0	0	0	0	0	0	0	5	0	0	2	7	0
Otu01731	Bacteria;Verrucomicrobia;Verrucomicrobiae;Verrucomicrobiales;Verrucomicrobiaceae;Akkermansia	0	0	0	0	0	0	0	0	0	0	33	0	0	0	0	0	0	0	0	0	0	0	0	0	0	0	0	0	0	0	0	0	0	0	0	0	0	0	0	0	0	0
Otu01732	Bacteria;Bacteroidetes;Bacteroidia;Bacteroidales;Rikenellaceae;Alistipes	0	11	0	0	0	0	0	0	0	0	0	0	0	0	0	0	0	0	0	0	3	0	0	0	2	0	0	0	0	0	1	0	0	1	0	0	0	0	0	0	0	15
Otu01733	Bacteria;Firmicutes;Clostridia;Clostridiales;Lachnospiraceae;unclassified_Lachnospiraceae	0	0	0	0	0	1	0	1	12	0	0	0	0	0	0	3	0	10	0	2	0	0	0	0	0	0	0	0	0	0	0	0	0	4	0	0	0	0	0	0	0	0
Otu01734	Bacteria;Firmicutes;Clostridia;Clostridiales;Ruminococcaceae;Ruminococcus	0	0	11	0	2	0	0	0	1	0	0	0	15	0	0	0	1	2	0	0	0	0	0	0	0	0	0	0	0	0	1	0	0	0	0	0	0	0	0	0	0	0
Otu01735	Bacteria;unclassified_Bacteria;;;;	0	0	0	0	0	0	0	0	0	0	0	33	0	0	0	0	0	0	0	0	0	0	0	0	0	0	0	0	0	0	0	0	0	0	0	0	0	0	0	0	0	0
Otu01736	Bacteria;Firmicutes;Clostridia;Clostridiales;Ruminococcaceae;Butyricicoccus	0	0	0	0	0	0	0	0	0	0	0	0	0	0	0	0	0	0	0	0	0	32	0	0	0	0	0	0	0	1	0	0	0	0	0	0	0	0	0	0	0	0
Otu01737	Bacteria;unclassified_Bacteria;;;;	0	0	0	0	0	0	0	0	0	0	0	0	0	0	0	0	0	0	0	0	0	33	0	0	0	0	0	0	0	0	0	0	0	0	0	0	0	0	0	0	0	0
Otu01738	Bacteria;Proteobacteria;Betaproteobacteria;Burkholderiales;Sutterellaceae;Sutterella	0	0	0	0	0	0	0	0	0	0	0	0	0	0	0	0	2	0	0	0	0	31	0	0	0	0	0	0	0	0	0	0	0	0	0	0	0	0	0	0	0	0
Otu01739	Bacteria;Firmicutes;Clostridia;Clostridiales;Lachnospiraceae;unclassified_Lachnospiraceae	0	1	0	1	6	1	0	0	0	19	0	0	0	1	1	2	1	0	0	0	0	0	0	0	0	0	0	0	0	0	0	0	0	0	0	0	0	0	0	0	0	0
Otu01740	Bacteria;Bacteroidetes;Bacteroidia;Bacteroidales;Prevotellaceae;Prevotella	0	0	0	0	0	0	0	0	0	0	0	0	3	4	0	5	21	0	0	0	0	0	0	0	0	0	0	0	0	0	0	0	0	0	0	0	0	0	0	0	0	0
Otu01741	Bacteria;Firmicutes;Erysipelotrichia;Erysipelotrichales;Erysipelotrichaceae;unclassified_Erysipelotrichaceae	0	0	0	0	0	0	0	0	0	0	0	0	0	0	0	0	1	0	31	1	0	0	0	0	0	0	0	0	0	0	0	0	0	0	0	0	0	0	0	0	0	0
Otu01742	Bacteria;Firmicutes;Clostridia;Clostridiales;unclassified_Clostridiales;	7	0	0	0	0	0	5	0	0	0	0	0	0	0	0	2	0	0	0	0	6	4	0	0	0	0	0	0	0	0	0	0	0	7	1	0	0	0	0	0	0	0
Otu01743	Bacteria;unclassified_Bacteria;;;;	11	0	0	0	0	0	0	0	0	0	0	0	0	0	0	1	0	0	5	0	3	0	0	0	0	0	0	0	0	0	0	0	0	0	7	0	2	0	1	0	2	0
Otu01744	Bacteria;Firmicutes;Clostridia;Clostridiales;Ruminococcaceae;Clostridium IV	0	0	0	0	0	2	0	1	0	0	4	0	0	0	0	0	0	0	0	1	0	0	0	0	0	0	0	0	0	0	0	0	0	24	0	0	0	0	0	0	0	0
Otu01745	Bacteria;Firmicutes;Clostridia;Clostridiales;Ruminococcaceae;unclassified_Ruminococcaceae	0	0	0	0	0	0	0	0	0	0	0	0	3	0	0	0	3	0	0	1	20	0	0	1	0	0	0	0	0	0	0	0	0	3	0	0	0	1	0	0	0	0
Otu01746	Bacteria;Firmicutes;Clostridia;Clostridiales;Ruminococcaceae;Ruminococcus	0	0	0	0	0	3	0	3	0	0	13	0	0	0	0	0	0	0	10	1	0	0	0	0	0	0	0	0	0	0	0	0	0	2	0	0	0	0	0	0	0	0
Otu01747	Bacteria;Firmicutes;Clostridia;Clostridiales;Ruminococcaceae;Faecalibacterium	0	0	0	0	3	1	0	2	1	3	0	0	1	5	0	8	0	0	1	4	0	0	0	0	0	0	0	0	0	0	0	0	0	3	0	0	0	0	0	0	0	0
Otu01748	Bacteria;Firmicutes;Clostridia;Clostridiales;unclassified_Clostridiales;	1	0	0	0	2	2	0	4	2	0	1	2	1	6	0	6	0	1	3	0	1	0	0	0	0	0	0	0	0	0	0	0	0	0	0	0	0	0	0	0	0	0
Otu01749	Bacteria;Firmicutes;Clostridia;Clostridiales;Lachnospiraceae;Roseburia	0	0	0	0	0	8	2	0	2	7	0	0	0	0	0	0	1	0	0	0	1	0	0	1	0	0	2	0	0	1	7	0	0	0	0	0	0	0	0	0	0	0
Otu01750	Bacteria;Firmicutes;Clostridia;Clostridiales;Lachnospiraceae;unclassified_Lachnospiraceae	1	0	0	0	1	0	1	0	1	0	0	0	0	4	1	1	0	0	1	1	0	0	0	0	0	0	0	0	2	0	3	1	0	5	2	0	1	0	1	0	4	1
Otu01751	Bacteria;Firmicutes;Clostridia;Clostridiales;Lachnospiraceae;Roseburia	1	0	2	1	0	0	0	0	1	2	0	0	1	0	0	0	1	3	0	0	0	0	0	0	0	0	0	0	0	0	0	0	0	0	0	0	0	0	0	1	18	1
Otu01752	Bacteria;Firmicutes;Clostridia;Clostridiales;Peptostreptococcaceae;Romboutsia	0	0	0	0	0	2	0	1	0	2	10	2	1	3	0	3	0	0	2	0	0	0	0	0	0	0	0	0	1	2	0	0	0	2	0	0	0	0	0	0	0	1
Otu01753	Bacteria;Proteobacteria;unclassified_Proteobacteria;;;	0	0	0	0	0	1	0	0	0	0	0	6	0	0	0	0	0	0	0	0	0	0	0	0	0	2	0	0	4	9	1	9	0	0	0	0	0	0	0	0	0	0
Otu01754	Bacteria;unclassified_Bacteria;;;;	0	0	0	0	0	0	0	0	0	0	0	0	0	0	3	0	0	0	0	4	0	0	0	0	0	0	0	0	0	0	0	0	0	0	0	0	24	0	0	1	0	0
Otu01755	Bacteria;Firmicutes;Clostridia;Clostridiales;Ruminococcaceae;Gemmiger	23	0	0	0	0	0	0	0	0	0	0	0	0	0	0	1	0	0	2	2	3	0	0	0	0	0	0	0	1	0	0	0	0	0	0	0	0	0	0	0	0	0
Otu01756	Bacteria;Firmicutes;Clostridia;Clostridiales;unclassified_Clostridiales;	0	0	0	0	2	1	0	0	0	2	0	1	1	0	0	2	1	0	0	0	0	0	3	0	0	0	0	0	0	16	0	0	0	2	1	0	0	0	0	0	0	0
Otu01757	Bacteria;Firmicutes;Clostridia;Clostridiales;Lachnospiraceae;unclassified_Lachnospiraceae	1	1	1	0	0	0	0	4	2	1	0	0	0	1	2	0	2	3	3	1	4	0	0	0	0	0	0	2	0	0	1	0	0	3	0	0	0	0	0	0	0	0
Otu01758	Bacteria;Firmicutes;Clostridia;Clostridiales;Ruminococcaceae;unclassified_Ruminococcaceae	0	0	0	0	2	2	0	2	0	3	1	0	3	0	0	10	0	0	9	0	0	0	0	0	0	0	0	0	0	0	0	0	0	0	0	0	0	0	0	0	0	0
Otu01759	Bacteria;Firmicutes;Clostridia;Clostridiales;Lachnospiraceae;Roseburia	0	0	1	0	0	0	0	0	2	0	0	0	21	0	0	0	0	8	0	0	0	0	0	0	0	0	0	0	0	0	0	0	0	0	0	0	0	0	0	0	0	0
Otu01760	Bacteria;Firmicutes;Negativicutes;Selenomonadales;Veillonellaceae;Megamonas	0	0	0	0	0	0	0	0	0	0	0	0	0	0	1	1	0	0	0	0	0	4	0	0	0	13	8	1	0	0	0	0	1	0	0	0	0	0	3	0	0	0
Otu01761	Bacteria;Firmicutes;Clostridia;Clostridiales;Lachnospiraceae;unclassified_Lachnospiraceae	4	2	0	0	1	2	0	9	0	0	0	0	0	1	1	0	0	1	0	2	5	0	0	0	0	0	1	2	0	0	0	0	0	0	1	0	0	0	0	0	0	0
Otu01762	Bacteria;Firmicutes;Clostridia;Clostridiales;Lachnospiraceae;Blautia	0	2	2	0	0	0	0	1	0	1	0	2	0	0	0	1	2	0	0	0	0	0	0	0	0	0	0	0	0	0	1	0	0	5	0	1	0	1	11	1	0	1
Otu01763	Bacteria;Bacteroidetes;Bacteroidia;Bacteroidales;Bacteroidaceae;Bacteroides	0	3	3	2	2	0	0	0	2	0	0	0	0	0	0	2	0	0	0	0	1	0	0	5	0	0	0	2	0	0	1	0	0	0	0	0	0	0	5	0	0	4
Otu01764	Bacteria;Firmicutes;Clostridia;Clostridiales;Lachnospiraceae;Lachnospiracea_incertae_sedis	0	0	0	0	17	1	0	1	1	12	0	0	0	0	0	0	0	0	0	0	0	0	0	0	0	0	0	0	0	0	0	0	0	0	0	0	0	0	0	0	0	0
Otu01765	Bacteria;Firmicutes;Clostridia;Clostridiales;Lachnospiraceae;unclassified_Lachnospiraceae	1	0	0	1	0	0	1	0	2	1	0	0	0	1	1	2	0	0	1	0	0	0	0	0	0	0	0	0	0	0	0	0	1	0	2	0	0	0	0	0	16	2
Otu01766	Bacteria;Firmicutes;Clostridia;Clostridiales;Lachnospiraceae;unclassified_Lachnospiraceae	0	0	0	0	0	5	6	0	5	2	0	0	1	0	1	1	0	0	0	1	0	0	0	0	0	0	0	1	1	0	1	0	4	1	1	0	1	0	0	0	0	0
Otu01767	Bacteria;Bacteroidetes;Bacteroidia;Bacteroidales;unclassified_Bacteroidales;	0	0	0	0	0	0	0	0	0	0	0	0	0	0	0	0	0	0	0	0	0	0	0	0	0	0	0	0	32	0	0	0	0	0	0	0	0	0	0	0	0	0
Otu01768	Bacteria;Bacteroidetes;Bacteroidia;Bacteroidales;Prevotellaceae;Prevotella	0	0	0	2	2	0	0	0	0	4	0	0	0	1	0	0	4	0	0	0	0	0	0	0	0	0	0	0	0	0	3	0	0	0	0	0	0	16	0	0	0	0
Otu01769	Bacteria;Bacteroidetes;Bacteroidia;Bacteroidales;Prevotellaceae;Prevotella	0	0	0	0	0	0	0	0	0	14	0	0	3	1	0	0	14	0	0	0	0	0	0	0	0	0	0	0	0	0	0	0	0	0	0	0	0	0	0	0	0	0
Otu01770	Bacteria;Bacteroidetes;Bacteroidia;Bacteroidales;Prevotellaceae;unclassified_Prevotellaceae	0	0	0	5	0	0	0	0	0	2	0	0	2	0	5	3	7	0	0	0	0	0	0	0	0	0	0	0	0	0	7	0	0	1	0	0	0	0	0	0	0	0
Otu01771	Bacteria;Bacteroidetes;Bacteroidia;Bacteroidales;Prevotellaceae;Prevotella	0	0	0	4	1	0	0	0	1	4	0	0	6	3	3	0	1	0	0	0	0	0	0	0	2	0	0	0	0	0	1	0	0	0	0	0	0	6	0	0	0	0
Otu01772	Bacteria;Firmicutes;Clostridia;Clostridiales;unclassified_Clostridiales;	3	0	0	0	0	9	0	0	0	0	0	0	0	0	0	0	0	0	0	1	7	0	0	0	0	0	0	0	0	9	0	0	0	0	3	0	0	0	0	0	0	0
Otu01773	Bacteria;Bacteroidetes;Bacteroidia;Bacteroidales;Prevotellaceae;Prevotella	0	0	0	0	0	0	0	0	0	23	0	0	1	0	0	0	8	0	0	0	0	0	0	0	0	0	0	0	0	0	0	0	0	0	0	0	0	0	0	0	0	0
Otu01774	Bacteria;Firmicutes;Clostridia;Clostridiales;Ruminococcaceae;unclassified_Ruminococcaceae	0	0	0	0	0	0	0	0	0	3	2	0	0	3	0	24	0	0	0	0	0	0	0	0	0	0	0	0	0	0	0	0	0	0	0	0	0	0	0	0	0	0
Otu01775	Bacteria;Lentisphaerae;Lentisphaeria;Victivallales;Victivallaceae;Victivallis	0	0	0	0	0	0	0	0	0	0	0	0	0	1	0	0	0	0	0	0	0	0	0	0	3	0	0	0	0	0	0	0	0	28	0	0	0	0	0	0	0	0
Otu01776	Bacteria;Firmicutes;Clostridia;Clostridiales;Lachnospiraceae;Lachnospiracea_incertae_sedis	1	0	0	1	1	0	0	4	1	2	0	0	0	1	4	2	0	1	0	0	0	0	0	0	1	0	0	0	1	0	0	0	4	0	7	0	0	0	0	0	0	1
Otu01777	Bacteria;Firmicutes;Negativicutes;Selenomonadales;Veillonellaceae;Megamonas	0	0	1	0	0	0	0	0	0	0	0	0	0	0	0	0	1	0	0	0	0	5	0	1	0	13	0	0	0	0	0	0	0	3	0	0	0	0	1	7	0	0
Otu01778	Bacteria;Firmicutes;Clostridia;Clostridiales;Lachnospiraceae;unclassified_Lachnospiraceae	0	0	0	0	0	0	0	1	1	0	0	0	0	0	0	0	0	0	0	1	0	0	0	0	0	0	0	0	0	29	0	0	0	0	0	0	0	0	0	0	0	0
Otu01779	Bacteria;Firmicutes;Clostridia;Clostridiales;Ruminococcaceae;unclassified_Ruminococcaceae	0	0	0	0	5	0	0	0	0	3	3	0	1	4	0	11	0	0	0	5	0	0	0	0	0	0	0	0	0	0	0	0	0	0	0	0	0	0	0	0	0	0
Otu01780	Bacteria;Firmicutes;Clostridia;Clostridiales;Ruminococcaceae;Clostridium IV	0	0	0	0	0	5	0	1	0	0	1	0	0	0	0	0	0	0	20	1	0	0	0	0	0	0	0	0	0	0	0	0	0	3	0	0	0	0	0	0	0	0
Otu01781	Bacteria;Firmicutes;Clostridia;Clostridiales;Lachnospiraceae;Clostridium XlVa	0	0	0	0	0	1	0	1	0	0	0	0	0	0	1	0	0	0	0	0	2	18	0	0	0	3	0	0	0	0	0	3	0	0	2	0	0	0	0	0	0	0
Otu01782	Bacteria;Firmicutes;Clostridia;Clostridiales;Ruminococcaceae;Faecalibacterium	0	0	0	0	0	0	0	0	0	0	0	0	0	0	0	0	0	0	3	0	0	0	0	0	0	0	0	0	0	0	0	0	0	0	15	0	0	0	0	0	0	13
Otu01783	Bacteria;Bacteroidetes;Bacteroidia;Bacteroidales;Bacteroidaceae;Bacteroides	0	0	0	0	0	0	0	0	0	0	0	0	0	0	0	0	0	0	0	0	0	0	0	0	0	0	0	0	15	0	0	0	0	0	2	0	2	0	1	0	11	0
Otu01784	Bacteria;Firmicutes;Clostridia;Clostridiales;Lachnospiraceae;unclassified_Lachnospiraceae	0	0	0	0	1	1	1	4	3	0	0	0	3	1	0	1	1	5	0	0	0	0	0	0	1	0	0	0	1	0	0	0	0	5	1	0	1	0	0	0	1	0
Otu01785	Bacteria;Firmicutes;Clostridia;Clostridiales;Ruminococcaceae;Faecalibacterium	0	0	5	0	1	0	0	0	0	1	0	0	2	3	0	9	0	0	0	2	0	0	0	0	1	0	0	0	0	1	0	0	4	0	2	0	0	0	0	0	0	0
Otu01786	Bacteria;Firmicutes;Clostridia;Clostridiales;Lachnospiraceae;Blautia	2	0	0	2	1	1	0	2	1	1	0	0	0	1	2	0	0	0	2	0	4	0	0	0	1	0	0	0	0	0	0	0	0	1	4	0	0	0	0	0	0	6
Otu01787	Bacteria;Firmicutes;Clostridia;Clostridiales;Lachnospiraceae;unclassified_Lachnospiraceae	11	0	1	0	0	0	2	0	0	0	0	0	0	0	0	0	0	0	1	0	4	4	0	0	0	0	3	0	0	0	0	5	0	0	0	0	0	0	0	0	0	0
Otu01788	Bacteria;Bacteroidetes;Bacteroidia;Bacteroidales;Rikenellaceae;Alistipes	0	2	0	0	0	5	0	9	0	0	0	1	0	0	0	0	0	0	0	0	0	0	0	0	0	0	0	0	0	0	0	0	0	14	0	0	0	0	0	0	0	0
Otu01789	Bacteria;Firmicutes;Clostridia;Clostridiales;Ruminococcaceae;Faecalibacterium	0	0	0	0	0	0	0	0	0	0	0	0	0	0	0	0	0	0	0	9	3	5	0	0	0	0	0	0	1	0	0	0	0	0	0	0	1	0	0	0	12	0
Otu01790	Bacteria;Firmicutes;Clostridia;Clostridiales;Peptoniphilaceae;Peptoniphilus	0	0	0	0	0	0	0	0	23	0	0	7	0	0	0	1	0	0	0	0	0	0	0	0	0	0	0	0	0	0	0	0	0	0	0	0	0	0	0	0	0	0
Otu01791	Bacteria;Firmicutes;Clostridia;Clostridiales;Lachnospiraceae;unclassified_Lachnospiraceae	0	0	0	1	0	0	2	0	1	1	0	0	0	0	0	0	0	0	0	0	1	0	0	0	0	0	0	0	1	0	0	0	0	2	2	0	0	1	0	0	19	0
Otu01792	Bacteria;Firmicutes;Clostridia;Clostridiales;unclassified_Clostridiales;	0	0	0	2	4	5	0	0	0	1	8	8	0	1	0	1	0	0	1	0	0	0	0	0	0	0	0	0	0	0	0	0	0	0	0	0	0	0	0	0	0	0
Otu01793	Bacteria;Firmicutes;Bacilli;Lactobacillales;Streptococcaceae;Streptococcus	0	0	0	0	0	0	0	0	0	0	0	0	0	0	0	0	0	1	1	0	0	0	0	0	1	0	0	0	0	0	0	0	28	0	0	0	0	0	0	0	0	0
Otu01794	Bacteria;Firmicutes;Negativicutes;Selenomonadales;Acidaminococcaceae;Phascolarctobacterium	0	0	0	0	0	0	0	0	0	0	0	0	0	0	0	0	0	0	1	0	0	0	0	0	0	0	0	30	0	0	0	0	0	0	0	0	0	0	0	0	0	0
Otu01795	Bacteria;Firmicutes;Clostridia;Clostridiales;unclassified_Clostridiales;	0	21	0	1	7	0	0	0	0	0	0	0	1	0	0	0	0	0	0	0	0	0	0	0	0	0	0	0	0	0	1	0	0	0	0	0	0	0	0	0	0	0
Otu01796	Bacteria;Firmicutes;Clostridia;Clostridiales;Lachnospiraceae;Blautia	0	0	0	0	0	0	16	2	1	0	0	0	0	0	0	0	0	0	0	0	5	0	0	0	0	0	0	0	0	0	0	0	1	0	6	0	0	0	0	0	0	0
Otu01797	Bacteria;Bacteroidetes;Bacteroidia;Bacteroidales;Prevotellaceae;Prevotella	0	3	0	0	2	0	0	0	1	0	0	0	0	7	0	7	0	0	0	0	3	0	0	0	1	0	0	2	0	0	0	0	0	2	0	0	0	0	0	0	0	3
Otu01798	Bacteria;Firmicutes;Clostridia;Clostridiales;Lachnospiraceae;unclassified_Lachnospiraceae	0	1	0	0	16	8	0	1	0	3	0	0	0	1	0	1	0	0	0	0	0	0	0	0	0	0	0	0	0	0	0	0	0	0	0	0	0	0	0	0	0	0
Otu01799	Bacteria;Firmicutes;Clostridia;Clostridiales;Lachnospiraceae;unclassified_Lachnospiraceae	0	0	0	1	9	8	0	4	0	0	0	0	0	2	0	0	1	0	0	0	0	0	1	0	0	0	1	1	0	1	0	0	0	2	0	0	0	0	0	0	0	0
Otu01800	Bacteria;Bacteroidetes;Bacteroidia;Bacteroidales;Bacteroidaceae;Bacteroides	0	0	0	0	0	4	0	0	4	0	0	0	0	0	0	0	0	0	0	0	9	0	0	0	0	0	0	0	1	11	0	0	0	2	0	0	0	0	0	0	0	0
Otu01801	Bacteria;Firmicutes;Negativicutes;Selenomonadales;Acidaminococcaceae;Phascolarctobacterium	0	0	0	0	0	20	0	0	0	0	0	11	0	0	0	0	0	0	0	0	0	0	0	0	0	0	0	0	0	0	0	0	0	0	0	0	0	0	0	0	0	0
Otu01802	Bacteria;unclassified_Bacteria;;;;	0	0	0	0	0	0	0	0	0	10	0	6	0	0	0	0	4	0	0	0	1	1	0	1	0	1	0	0	0	1	2	2	0	0	0	0	1	0	0	0	1	0
Otu01803	Bacteria;unclassified_Bacteria;;;;	0	0	0	0	0	0	0	0	1	0	0	0	0	0	0	0	0	0	0	2	0	0	0	10	0	13	0	0	2	0	1	0	0	0	0	0	0	0	0	2	0	0
Otu01804	Bacteria;unclassified_Bacteria;;;;	0	0	0	0	0	0	0	0	0	14	0	0	0	4	0	13	0	0	0	0	0	0	0	0	0	0	0	0	0	0	0	0	0	0	0	0	0	0	0	0	0	0
Otu01805	Bacteria;Bacteroidetes;Bacteroidia;Bacteroidales;unclassified_Bacteroidales;	0	0	0	0	0	0	0	0	0	0	0	0	0	0	0	0	0	0	0	0	0	0	0	0	0	0	0	0	0	0	0	0	0	31	0	0	0	0	0	0	0	0
Otu01806	Bacteria;Bacteroidetes;Bacteroidia;Bacteroidales;Prevotellaceae;Prevotella	0	0	0	0	0	0	0	0	0	0	1	0	0	1	0	4	0	0	0	0	0	0	0	0	3	0	0	0	0	0	1	0	21	0	0	0	0	0	0	0	0	0
Otu01807	Bacteria;Bacteroidetes;Bacteroidia;Bacteroidales;Bacteroidaceae;Bacteroides	0	0	0	0	0	0	0	0	0	0	0	0	0	0	0	0	0	0	0	0	0	0	0	0	0	0	0	0	0	0	0	0	0	0	0	0	0	0	0	0	31	0
Otu01808	Bacteria;Firmicutes;Negativicutes;Selenomonadales;Veillonellaceae;Megamonas	0	1	1	0	0	0	0	0	0	0	0	0	0	0	0	0	0	0	0	0	0	0	0	0	2	0	0	0	0	0	0	0	0	0	0	27	0	0	0	0	0	0
Otu01809	Bacteria;Firmicutes;Clostridia;Clostridiales;Ruminococcaceae;Clostridium IV	0	0	0	0	6	0	0	2	0	11	10	0	0	2	0	0	0	0	0	0	0	0	0	0	0	0	0	0	0	0	0	0	0	0	0	0	0	0	0	0	0	0
Otu01810	Bacteria;Bacteroidetes;Bacteroidia;Bacteroidales;unclassified_Bacteroidales;	0	0	0	0	0	0	0	0	31	0	0	0	0	0	0	0	0	0	0	0	0	0	0	0	0	0	0	0	0	0	0	0	0	0	0	0	0	0	0	0	0	0
Otu01811	Bacteria;Bacteroidetes;Bacteroidia;Bacteroidales;Prevotellaceae;Prevotella	0	17	3	0	0	0	0	0	0	0	0	0	0	0	0	0	0	0	0	0	0	0	11	0	0	0	0	0	0	0	0	0	0	0	0	0	0	0	0	0	0	0
Otu01812	Bacteria;Firmicutes;Clostridia;Clostridiales;Ruminococcaceae;unclassified_Ruminococcaceae	0	0	0	0	30	0	0	0	0	0	0	0	0	0	0	0	0	0	0	0	0	0	0	0	0	0	0	0	0	0	0	0	0	0	0	0	1	0	0	0	0	0
Otu01813	Bacteria;Bacteroidetes;Bacteroidia;Bacteroidales;Bacteroidaceae;Bacteroides	0	0	0	0	0	0	0	0	0	0	0	0	0	0	0	0	0	0	0	0	0	0	0	0	0	0	0	0	0	0	0	0	0	0	0	0	0	0	0	31	0	0
Otu01814	Bacteria;Bacteroidetes;Bacteroidia;Bacteroidales;Prevotellaceae;Paraprevotella	0	1	0	0	0	0	0	0	0	0	0	0	0	0	1	0	0	0	0	0	0	0	0	0	1	21	0	0	7	0	0	0	0	0	0	0	0	0	0	0	0	0
Otu01815	Bacteria;Firmicutes;Clostridia;Clostridiales;Lachnospiraceae;unclassified_Lachnospiraceae	0	0	0	0	0	1	3	0	0	0	0	0	0	0	0	0	0	0	0	1	5	0	0	0	0	0	0	0	0	19	0	0	0	0	2	0	0	0	0	0	0	0
Otu01816	Bacteria;Bacteroidetes;Bacteroidia;Bacteroidales;unclassified_Bacteroidales;	0	0	0	0	0	0	0	0	0	0	0	0	0	0	0	7	0	0	0	0	0	0	0	0	0	0	0	0	0	0	0	0	24	0	0	0	0	0	0	0	0	0
Otu01817	Bacteria;Bacteroidetes;Bacteroidia;Bacteroidales;Bacteroidaceae;Bacteroides	0	0	0	0	0	0	0	0	0	0	0	0	0	0	0	0	0	0	0	0	0	0	0	0	0	0	0	0	0	0	0	0	0	0	0	0	31	0	0	0	0	0
Otu01818	Bacteria;Actinobacteria;Actinobacteria;Bifidobacteriales;Bifidobacteriaceae;unclassified_Bifidobacteriaceae	0	0	0	0	0	5	0	0	0	0	0	0	0	0	0	0	0	0	1	7	0	0	0	0	0	0	0	0	9	0	0	0	1	8	0	0	0	0	0	0	0	0
Otu01819	Bacteria;Firmicutes;Clostridia;Clostridiales;Lachnospiraceae;Clostridium XlVa	0	3	1	1	0	0	0	0	0	0	0	11	0	0	0	3	0	0	9	1	1	0	0	0	0	0	0	0	0	0	0	0	0	0	0	0	0	0	0	0	0	0
Otu01820	Bacteria;Bacteroidetes;Bacteroidia;Bacteroidales;Bacteroidaceae;Bacteroides	0	0	0	0	0	5	0	10	0	0	0	1	0	0	0	0	0	0	7	0	0	0	0	0	0	0	0	0	0	0	0	0	0	7	0	0	0	0	0	0	0	0
Otu01821	Bacteria;Firmicutes;Clostridia;Clostridiales;Lachnospiraceae;Roseburia	0	0	0	0	0	0	0	0	0	0	0	0	22	0	0	0	1	1	0	5	0	0	0	0	0	0	0	0	0	0	0	0	1	0	0	0	0	0	0	0	0	0
Otu01822	Bacteria;Firmicutes;Clostridia;Clostridiales;Lachnospiraceae;unclassified_Lachnospiraceae	1	0	0	0	0	0	1	0	0	0	0	0	0	0	0	0	0	0	0	0	4	4	0	1	0	8	1	0	0	0	0	10	0	0	0	0	0	0	0	0	0	0
Otu01823	Bacteria;Firmicutes;Clostridia;Clostridiales;Lachnospiraceae;Dorea	1	0	0	0	0	1	0	0	1	0	0	0	0	0	1	1	1	0	0	1	5	0	0	0	0	0	1	0	0	0	0	0	0	13	1	0	0	0	1	1	1	0
Otu01824	Bacteria;Firmicutes;Clostridia;Clostridiales;Lachnospiraceae;Blautia	1	0	0	1	1	0	1	3	0	0	0	0	0	0	0	0	0	0	1	3	0	0	0	0	0	0	0	0	0	0	1	0	0	6	4	0	0	0	0	0	0	8
Otu01825	Bacteria;Firmicutes;Clostridia;Clostridiales;Ruminococcaceae;Butyricicoccus	1	1	1	0	1	0	1	2	1	0	0	0	0	1	3	1	1	1	3	0	0	0	0	0	0	0	1	0	0	5	0	0	0	1	4	0	0	0	0	0	1	0
Otu01826	Bacteria;Firmicutes;Clostridia;Clostridiales;Lachnospiraceae;unclassified_Lachnospiraceae	0	0	5	0	0	4	1	0	4	0	0	0	0	0	1	6	0	0	0	0	0	0	0	1	0	0	0	0	1	1	0	0	2	3	0	0	0	0	0	0	1	0
Otu01827	Bacteria;Firmicutes;Clostridia;Clostridiales;Lachnospiraceae;Anaerostipes	1	0	0	0	0	1	11	2	0	0	0	0	0	0	1	3	0	0	0	0	0	0	0	0	0	0	1	0	0	6	0	0	1	0	1	0	1	0	0	0	0	1
Otu01828	Bacteria;Firmicutes;Clostridia;Clostridiales;Lachnospiraceae;Blautia	2	0	0	0	2	2	0	2	0	0	0	0	0	0	0	1	1	0	7	1	5	0	0	0	0	0	0	0	0	0	0	0	0	4	2	0	0	0	0	0	0	1
Otu01829	Bacteria;Firmicutes;Clostridia;Clostridiales;Lachnospiraceae;Ruminococcus2	7	1	1	0	1	5	2	0	0	0	2	0	0	0	0	0	0	0	0	1	0	0	0	0	0	0	0	0	1	0	0	0	0	0	0	0	0	0	0	0	9	0
Otu01830	Bacteria;Bacteroidetes;Bacteroidia;Bacteroidales;unclassified_Bacteroidales;	0	0	0	0	0	0	0	0	0	0	0	0	0	0	0	0	0	0	0	16	0	0	0	0	0	0	0	0	5	0	0	0	0	0	1	0	3	0	0	0	5	0
Otu01831	Bacteria;Firmicutes;Clostridia;Clostridiales;Ruminococcaceae;Faecalibacterium	0	0	0	0	0	0	0	0	0	0	0	0	0	0	0	0	0	0	0	11	0	0	0	0	0	0	0	0	3	0	0	0	0	0	1	0	0	0	0	0	15	0
Otu01832	Bacteria;Firmicutes;Clostridia;Clostridiales;Lachnospiraceae;Ruminococcus2	1	0	1	1	0	1	4	1	3	0	0	0	0	1	0	5	0	1	0	0	6	0	1	0	0	0	0	0	1	2	0	0	0	1	0	0	0	0	0	0	0	0
Otu01833	Bacteria;Bacteroidetes;Bacteroidia;Bacteroidales;Bacteroidaceae;Bacteroides	0	0	0	0	0	0	0	0	0	0	0	0	0	0	0	0	0	0	0	0	2	0	0	0	0	0	0	0	28	0	0	0	0	0	0	0	0	0	0	0	0	0
Otu01834	Bacteria;Firmicutes;Clostridia;Clostridiales;Clostridiaceae 1;Clostridium sensu stricto	0	0	0	0	2	16	0	0	0	0	1	7	0	1	0	0	0	0	0	0	0	0	0	0	0	0	1	0	0	0	0	0	0	0	0	0	0	0	0	0	0	2
Otu01835	Bacteria;Bacteroidetes;Bacteroidia;Bacteroidales;Porphyromonadaceae;Barnesiella	0	0	0	0	1	0	0	0	2	0	0	0	0	2	11	0	1	0	0	0	5	0	0	1	4	0	0	0	0	0	0	0	0	1	0	2	0	0	0	0	0	0
Otu01836	Bacteria;Firmicutes;Negativicutes;Selenomonadales;Veillonellaceae;Megamonas	0	1	0	0	0	0	0	0	0	0	0	0	0	0	2	0	0	0	0	0	0	0	0	1	0	0	0	25	0	0	0	0	1	0	0	0	0	0	0	0	0	0
Otu01837	Bacteria;Proteobacteria;Betaproteobacteria;Burkholderiales;Sutterellaceae;Parasutterella	0	0	0	0	0	0	0	0	0	0	0	8	0	0	0	0	0	0	0	0	0	0	1	0	0	0	0	0	4	17	0	0	0	0	0	0	0	0	0	0	0	0
Otu01838	Bacteria;Proteobacteria;Deltaproteobacteria;Desulfovibrionales;unclassified_Desulfovibrionales;	0	0	0	0	0	0	0	0	0	0	10	0	0	8	0	0	1	0	0	0	0	0	0	0	0	0	0	0	0	0	0	0	0	0	0	0	0	8	0	0	3	0
Otu01839	Bacteria;Firmicutes;Clostridia;Clostridiales;Lachnospiraceae;unclassified_Lachnospiraceae	0	0	0	0	24	1	0	0	0	5	0	0	0	0	0	0	0	0	0	0	0	0	0	0	0	0	0	0	0	0	0	0	0	0	0	0	0	0	0	0	0	0
Otu01840	Bacteria;Bacteroidetes;Bacteroidia;Bacteroidales;Prevotellaceae;Paraprevotella	0	1	0	0	0	0	0	0	0	1	0	0	0	0	12	2	0	10	0	0	0	0	0	0	2	0	0	0	0	0	0	0	0	0	0	0	0	0	0	2	0	0
Otu01841	Bacteria;Firmicutes;Clostridia;Clostridiales;Lachnospiraceae;Roseburia	0	0	0	0	0	0	0	0	13	0	0	0	0	0	0	0	0	0	0	0	0	0	0	0	0	0	15	0	0	0	0	0	2	0	0	0	0	0	0	0	0	0
Otu01842	Bacteria;Firmicutes;Erysipelotrichia;Erysipelotrichales;Erysipelotrichaceae;unclassified_Erysipelotrichaceae	2	0	0	0	0	1	2	0	2	0	0	2	0	0	0	1	1	0	2	0	6	0	0	0	0	0	0	0	0	4	0	3	0	2	1	0	0	0	0	0	1	0
Otu01843	Bacteria;Firmicutes;Erysipelotrichia;Erysipelotrichales;Erysipelotrichaceae;unclassified_Erysipelotrichaceae	0	0	0	0	1	0	0	0	0	0	0	8	0	0	0	0	0	0	0	0	0	0	0	0	0	0	21	0	0	0	0	0	0	0	0	0	0	0	0	0	0	0
Otu01844	Bacteria;Firmicutes;Negativicutes;Selenomonadales;Veillonellaceae;Megamonas	0	0	0	0	0	0	0	0	0	0	0	0	0	0	0	0	0	0	0	0	0	0	0	0	0	0	0	0	0	0	0	0	0	0	0	0	0	0	0	30	0	0
Otu01845	Bacteria;unclassified_Bacteria;;;;	0	0	1	0	0	0	0	0	0	0	0	0	0	0	0	0	0	0	0	0	0	0	0	3	0	15	4	1	0	0	0	0	0	0	0	2	0	0	0	4	0	0
Otu01846	Bacteria;Bacteroidetes;Bacteroidia;Bacteroidales;Prevotellaceae;unclassified_Prevotellaceae	0	0	0	0	0	0	0	0	0	4	0	0	7	3	0	0	16	0	0	0	0	0	0	0	0	0	0	0	0	0	0	0	0	0	0	0	0	0	0	0	0	0
Otu01847	Bacteria;Bacteroidetes;Bacteroidia;Bacteroidales;Bacteroidaceae;Bacteroides	0	0	0	0	0	0	0	0	0	0	0	0	0	0	0	0	0	0	0	0	0	29	0	0	0	0	0	0	0	0	0	0	0	0	0	0	0	0	0	0	1	0
Otu01848	Bacteria;Firmicutes;Negativicutes;Selenomonadales;Veillonellaceae;Megamonas	0	0	0	0	0	0	0	0	0	0	0	0	0	0	0	0	6	0	0	0	0	10	0	6	1	5	0	0	0	0	2	0	0	0	0	0	0	0	0	0	0	0
Otu01849	Bacteria;Firmicutes;Negativicutes;Selenomonadales;Veillonellaceae;Megamonas	0	0	3	0	0	0	0	0	0	0	0	0	0	0	1	0	0	0	0	0	0	0	0	2	11	0	0	0	0	0	1	0	0	0	0	0	0	2	10	0	0	0
Otu01850	Bacteria;Firmicutes;Clostridia;Clostridiales;Ruminococcaceae;unclassified_Ruminococcaceae	0	0	1	0	0	4	0	1	1	2	0	0	0	1	0	19	0	0	0	1	0	0	0	0	0	0	0	0	0	0	0	0	0	0	0	0	0	0	0	0	0	0
Otu01851	Bacteria;Bacteroidetes;Bacteroidia;Bacteroidales;Prevotellaceae;Prevotella	0	5	0	3	1	0	0	0	0	1	0	0	1	0	4	2	2	0	0	0	0	0	0	0	0	0	0	0	0	0	0	0	0	0	0	0	0	5	6	0	0	0
Otu01852	Bacteria;Verrucomicrobia;Verrucomicrobiae;Verrucomicrobiales;Verrucomicrobiaceae;Akkermansia	0	0	0	0	0	0	0	0	0	0	30	0	0	0	0	0	0	0	0	0	0	0	0	0	0	0	0	0	0	0	0	0	0	0	0	0	0	0	0	0	0	0
Otu01853	Bacteria;Firmicutes;Clostridia;Clostridiales;Ruminococcaceae;unclassified_Ruminococcaceae	0	0	0	0	3	6	0	1	1	2	4	0	0	2	0	11	0	0	0	0	0	0	0	0	0	0	0	0	0	0	0	0	0	0	0	0	0	0	0	0	0	0
Otu01854	Bacteria;Firmicutes;Negativicutes;Selenomonadales;Veillonellaceae;Megamonas	0	0	0	0	0	0	0	0	0	0	0	0	0	0	1	0	0	0	0	0	0	0	0	6	0	7	1	1	0	0	0	0	0	1	0	1	0	8	3	1	0	0
Otu01855	Bacteria;Firmicutes;Erysipelotrichia;Erysipelotrichales;Erysipelotrichaceae;unclassified_Erysipelotrichaceae	0	0	0	0	0	0	0	0	0	0	0	0	2	0	0	0	1	0	0	27	0	0	0	0	0	0	0	0	0	0	0	0	0	0	0	0	0	0	0	0	0	0
Otu01856	Bacteria;Firmicutes;Clostridia;Clostridiales;Lachnospiraceae;unclassified_Lachnospiraceae	0	0	0	0	0	0	0	0	6	0	0	0	0	1	0	8	0	14	0	0	0	0	0	0	0	0	0	0	0	0	1	0	0	0	0	0	0	0	0	0	0	0
Otu01857	Bacteria;Firmicutes;Clostridia;Clostridiales;Lachnospiraceae;unclassified_Lachnospiraceae	0	0	0	0	30	0	0	0	0	0	0	0	0	0	0	0	0	0	0	0	0	0	0	0	0	0	0	0	0	0	0	0	0	0	0	0	0	0	0	0	0	0
Otu01858	Bacteria;Bacteroidetes;Bacteroidia;Bacteroidales;Prevotellaceae;Prevotella	0	0	0	0	0	0	0	0	0	0	0	0	0	0	0	0	0	0	0	0	0	0	0	0	0	0	0	0	0	30	0	0	0	0	0	0	0	0	0	0	0	0
Otu01859	Bacteria;Firmicutes;Clostridia;Clostridiales;Lachnospiraceae;unclassified_Lachnospiraceae	0	0	0	0	0	0	0	0	26	2	0	0	0	0	0	0	1	0	0	0	0	0	0	0	0	0	0	0	0	0	0	0	0	0	0	0	0	1	0	0	0	0
Otu01860	Bacteria;Bacteroidetes;Bacteroidia;Bacteroidales;Prevotellaceae;unclassified_Prevotellaceae	0	0	0	0	0	0	0	0	0	0	0	0	0	0	0	0	0	0	0	0	0	0	0	30	0	0	0	0	0	0	0	0	0	0	0	0	0	0	0	0	0	0
Otu01861	Bacteria;Bacteroidetes;unclassified_Bacteroidetes;;;	0	0	0	0	0	0	0	0	0	0	28	0	0	0	0	0	0	0	0	2	0	0	0	0	0	0	0	0	0	0	0	0	0	0	0	0	0	0	0	0	0	0
Otu01862	Bacteria;unclassified_Bacteria;;;;	0	0	0	0	0	0	0	0	0	0	0	0	0	0	0	0	0	0	0	0	0	0	0	28	0	0	0	0	0	0	0	2	0	0	0	0	0	0	0	0	0	0
Otu01863	Bacteria;Firmicutes;Erysipelotrichia;Erysipelotrichales;Erysipelotrichaceae;unclassified_Erysipelotrichaceae	4	0	0	1	0	3	1	2	0	0	0	2	0	0	1	1	0	0	4	0	6	0	0	0	0	0	0	0	0	1	0	3	0	0	1	0	0	0	0	0	0	0
Otu01864	Bacteria;Actinobacteria;Actinobacteria;Bifidobacteriales;Bifidobacteriaceae;unclassified_Bifidobacteriaceae	0	0	0	0	0	0	0	0	0	0	0	0	0	0	0	0	0	0	30	0	0	0	0	0	0	0	0	0	0	0	0	0	0	0	0	0	0	0	0	0	0	0
Otu01865	Bacteria;Firmicutes;Clostridia;Clostridiales;Lachnospiraceae;Lachnospiracea_incertae_sedis	0	0	0	0	0	0	0	2	1	0	0	1	0	0	0	1	0	7	0	0	0	0	0	0	0	0	0	0	0	0	0	0	16	0	2	0	0	0	0	0	0	0
Otu01866	Bacteria;Firmicutes;Clostridia;Clostridiales;Lachnospiraceae;unclassified_Lachnospiraceae	0	0	0	0	0	0	1	0	1	0	0	0	0	0	0	0	0	0	0	0	4	4	0	0	0	0	1	6	0	2	1	0	0	2	0	0	1	0	0	0	5	1
Otu01867	Bacteria;Firmicutes;Clostridia;Clostridiales;unclassified_Clostridiales;	4	0	0	0	0	1	1	4	0	1	1	0	0	1	1	1	0	0	0	0	7	0	1	0	0	0	0	2	0	0	0	0	0	2	1	0	0	0	0	0	1	0
Otu01868	Bacteria;Firmicutes;Clostridia;Clostridiales;Ruminococcaceae;Ruminococcus	0	0	0	0	0	0	0	10	0	1	0	0	0	0	1	0	0	0	0	12	0	0	0	0	0	0	0	0	0	0	0	0	0	0	2	0	0	0	3	0	0	0
Otu01869	Bacteria;Firmicutes;Clostridia;Clostridiales;Ruminococcaceae;unclassified_Ruminococcaceae	0	0	0	0	0	0	0	20	1	0	1	0	0	0	0	0	0	0	4	0	0	0	0	0	0	0	0	0	0	0	0	0	0	3	0	0	0	0	0	0	0	0
Otu01870	Bacteria;Firmicutes;Clostridia;Clostridiales;Ruminococcaceae;unclassified_Ruminococcaceae	0	0	0	0	0	0	0	2	0	0	1	6	0	0	1	3	0	0	12	0	0	0	0	0	0	0	0	0	0	0	0	0	0	4	0	0	0	0	0	0	0	0
Otu01871	Bacteria;Firmicutes;Clostridia;Clostridiales;Ruminococcaceae;Faecalibacterium	1	3	2	0	1	0	0	2	0	0	0	0	0	0	0	0	0	0	0	3	3	0	0	1	0	0	0	4	0	0	0	0	2	0	3	0	0	0	0	0	2	2
Otu01872	Bacteria;Firmicutes;Negativicutes;Selenomonadales;Veillonellaceae;Dialister	0	13	0	0	0	0	0	0	0	0	0	0	2	0	0	0	0	0	0	0	0	0	1	0	0	0	0	0	0	0	3	0	0	9	0	0	0	1	0	0	0	0
Otu01873	Bacteria;Firmicutes;Clostridia;Clostridiales;Lachnospiraceae;Roseburia	4	2	2	0	2	0	0	1	1	0	0	0	1	0	0	1	0	3	0	0	0	0	0	0	1	0	0	0	0	0	0	0	0	3	0	0	0	1	0	0	3	4
Otu01874	Bacteria;Firmicutes;Clostridia;Clostridiales;Lachnospiraceae;unclassified_Lachnospiraceae	0	0	0	0	0	0	0	0	0	0	0	0	0	0	0	0	0	0	0	0	0	0	0	0	0	0	0	0	0	0	0	29	0	0	0	0	0	0	0	0	0	0
Otu01875	Bacteria;Firmicutes;Bacilli;Lactobacillales;Streptococcaceae;Streptococcus	0	1	0	0	0	2	0	0	1	0	0	0	0	0	0	0	0	1	6	0	0	0	0	0	0	0	0	0	0	0	0	0	17	0	0	0	0	1	0	0	0	0
Otu01876	Bacteria;Firmicutes;Clostridia;Clostridiales;Ruminococcaceae;unclassified_Ruminococcaceae	0	0	0	0	0	4	0	2	1	0	7	0	0	0	1	0	0	0	10	0	0	0	0	0	0	0	0	0	0	0	0	0	1	3	0	0	0	0	0	0	0	0
Otu01877	Bacteria;Bacteroidetes;Bacteroidia;Bacteroidales;unclassified_Bacteroidales;	0	0	0	0	0	19	0	8	0	0	0	0	0	0	0	0	0	0	0	1	0	0	0	0	0	0	0	0	0	0	0	0	0	1	0	0	0	0	0	0	0	0
Otu01878	Bacteria;unclassified_Bacteria;;;;	0	0	0	0	0	7	4	1	0	0	0	1	0	0	0	0	0	0	2	0	0	0	0	0	0	0	0	3	0	0	0	11	0	0	0	0	0	0	0	0	0	0
Otu01879	Bacteria;Firmicutes;Clostridia;Clostridiales;Lachnospiraceae;Roseburia	0	0	0	0	2	4	0	0	5	4	0	0	4	0	1	4	0	1	0	2	0	0	0	0	0	0	0	0	0	0	0	0	0	1	0	0	0	1	0	0	0	0
Otu01880	Bacteria;Firmicutes;Clostridia;Clostridiales;Lachnospiraceae;Roseburia	0	0	9	0	0	0	0	0	0	0	0	0	0	0	1	2	2	0	0	0	0	0	0	1	9	0	0	0	0	0	0	0	0	1	0	0	0	0	0	4	0	0
Otu01881	Bacteria;Actinobacteria;Actinobacteria;Bifidobacteriales;Bifidobacteriaceae;unclassified_Bifidobacteriaceae	1	0	0	0	0	0	0	0	0	0	0	0	0	0	0	0	0	0	28	0	0	0	0	0	0	0	0	0	0	0	0	0	0	0	0	0	0	0	0	0	0	0
Otu01882	Bacteria;Firmicutes;Clostridia;Clostridiales;unclassified_Clostridiales;	12	0	1	0	0	0	0	0	0	0	0	0	0	0	0	2	0	1	1	0	0	0	0	0	0	0	0	0	0	3	1	0	2	0	1	0	0	1	0	1	1	2
Otu01883	Bacteria;Firmicutes;Erysipelotrichia;Erysipelotrichales;Erysipelotrichaceae;unclassified_Erysipelotrichaceae	2	0	0	0	0	1	0	0	0	0	0	0	0	0	0	0	0	4	16	0	0	0	0	0	0	0	0	0	1	4	0	0	1	0	0	0	0	0	0	0	0	0
Otu01884	Bacteria;Firmicutes;Clostridia;Clostridiales;Lachnospiraceae;unclassified_Lachnospiraceae	9	2	0	0	2	0	3	0	0	1	0	0	0	3	1	0	0	0	0	0	0	0	0	0	0	0	1	0	0	0	0	0	0	0	5	0	0	0	0	0	0	2
Otu01885	Bacteria;Firmicutes;Clostridia;Clostridiales;Lachnospiraceae;unclassified_Lachnospiraceae	0	0	0	1	0	0	0	6	2	2	0	0	0	0	1	0	0	0	0	2	0	0	0	0	0	0	1	0	1	0	0	0	0	0	10	0	0	0	0	0	1	2
Otu01886	Bacteria;Bacteroidetes;Bacteroidia;Bacteroidales;Bacteroidaceae;Bacteroides	0	0	0	0	0	2	0	0	1	0	0	0	0	0	0	0	0	1	0	0	9	0	0	0	0	0	0	0	3	6	0	0	0	7	0	0	0	0	0	0	0	0
Otu01887	Bacteria;Proteobacteria;Deltaproteobacteria;Desulfovibrionales;Desulfovibrionaceae;Bilophila	1	0	0	0	0	2	0	0	0	0	0	18	0	0	0	0	0	0	0	0	1	4	0	0	0	0	0	0	1	0	1	0	0	1	0	0	0	0	0	0	0	0
Otu01888	Bacteria;Bacteroidetes;Bacteroidia;Bacteroidales;Porphyromonadaceae;Parabacteroides	0	0	0	0	0	0	0	0	1	0	0	0	0	0	0	0	0	0	0	0	8	0	0	0	0	0	0	0	6	14	0	0	0	0	0	0	0	0	0	0	0	0
Otu01889	Bacteria;Bacteroidetes;Bacteroidia;Bacteroidales;Bacteroidaceae;Bacteroides	0	0	1	0	0	0	0	0	0	0	0	0	0	0	0	0	0	0	0	0	8	0	1	4	0	0	2	1	0	0	0	0	0	0	0	6	0	0	0	6	0	0
Otu01890	Bacteria;Firmicutes;Clostridia;Clostridiales;Ruminococcaceae;Ruminococcus	0	0	0	0	5	0	0	0	0	0	0	0	0	22	0	2	0	0	0	0	0	0	0	0	0	0	0	0	0	0	0	0	0	0	0	0	0	0	0	0	0	0
Otu01891	Bacteria;Bacteroidetes;Bacteroidia;Bacteroidales;Prevotellaceae;Prevotella	0	0	0	0	0	0	0	0	0	0	0	0	0	0	0	0	0	0	0	0	0	0	0	0	0	0	0	0	0	0	0	0	0	0	0	0	0	29	0	0	0	0
Otu01892	Bacteria;Bacteroidetes;Bacteroidia;Bacteroidales;Prevotellaceae;Alloprevotella	0	0	0	0	0	0	0	0	0	0	0	0	0	0	0	0	0	0	0	0	0	0	0	0	0	0	0	0	0	0	0	0	0	0	0	0	29	0	0	0	0	0
Otu01893	Bacteria;Firmicutes;Clostridia;Clostridiales;unclassified_Clostridiales;	0	0	0	1	9	2	0	0	0	0	3	0	0	12	0	1	0	0	0	0	0	0	0	0	0	0	0	0	0	0	0	0	0	0	0	0	0	1	0	0	0	0
Otu01894	Bacteria;Bacteroidetes;Bacteroidia;Bacteroidales;Prevotellaceae;Prevotella	0	0	0	2	0	0	0	0	0	16	0	0	1	4	0	0	6	0	0	0	0	0	0	0	0	0	0	0	0	0	0	0	0	0	0	0	0	0	0	0	0	0
Otu01895	Bacteria;unclassified_Bacteria;;;;	0	0	0	0	0	0	0	0	0	0	0	0	15	5	0	0	9	0	0	0	0	0	0	0	0	0	0	0	0	0	0	0	0	0	0	0	0	0	0	0	0	0
Otu01896	Bacteria;Bacteroidetes;Bacteroidia;Bacteroidales;Prevotellaceae;Prevotella	0	0	0	0	0	0	0	0	0	2	0	0	0	0	0	0	3	0	0	0	0	0	0	7	0	0	1	0	0	0	16	0	0	0	0	0	0	0	0	0	0	0
Otu01897	Bacteria;Firmicutes;Bacilli;Lactobacillales;Lactobacillaceae;Lactobacillus	1	0	0	0	0	0	0	0	0	0	0	0	0	0	0	0	0	0	0	0	0	0	0	0	0	0	0	0	0	0	0	0	0	1	0	0	27	0	0	0	0	0
Otu01898	Bacteria;Firmicutes;Clostridia;Clostridiales;Lachnospiraceae;Coprococcus	0	0	0	0	15	1	0	0	2	10	0	0	0	0	0	1	0	0	0	0	0	0	0	0	0	0	0	0	0	0	0	0	0	0	0	0	0	0	0	0	0	0
Otu01899	Bacteria;Firmicutes;Negativicutes;Selenomonadales;Veillonellaceae;Mitsuokella	0	0	0	0	0	0	0	0	0	0	0	0	0	0	0	0	0	0	0	0	0	0	6	0	0	0	0	0	0	0	0	0	0	0	0	0	0	23	0	0	0	0
Otu01900	Bacteria;Firmicutes;Clostridia;Clostridiales;Ruminococcaceae;Ruminococcus	0	0	0	0	4	0	0	0	2	0	0	0	7	0	0	0	0	13	3	0	0	0	0	0	0	0	0	0	0	0	0	0	0	0	0	0	0	0	0	0	0	0
Otu01901	Bacteria;Bacteroidetes;Bacteroidia;Bacteroidales;Porphyromonadaceae;Butyricimonas	0	4	3	1	0	0	0	0	0	2	0	0	1	1	0	2	0	1	0	0	4	0	0	0	2	0	0	5	0	0	0	0	0	2	0	1	0	0	0	0	0	0
Otu01902	Bacteria;Firmicutes;Negativicutes;Selenomonadales;Veillonellaceae;Megamonas	0	0	0	0	0	0	0	0	0	0	0	0	0	0	0	0	0	0	0	0	0	0	0	8	3	0	0	0	0	0	0	0	0	0	0	1	0	8	8	1	0	0
Otu01903	Bacteria;Firmicutes;Negativicutes;Selenomonadales;Veillonellaceae;unclassified_Veillonellaceae	0	0	0	0	0	0	0	0	0	0	0	0	12	0	0	0	15	0	0	0	0	0	0	0	0	0	0	0	0	0	0	0	0	0	0	0	0	2	0	0	0	0
Otu01904	Bacteria;Firmicutes;Erysipelotrichia;Erysipelotrichales;Erysipelotrichaceae;unclassified_Erysipelotrichaceae	0	0	0	0	0	0	0	0	1	0	0	0	0	0	1	4	0	0	0	0	0	0	0	0	0	0	23	0	0	0	0	0	0	0	0	0	0	0	0	0	0	0
Otu01905	Bacteria;Firmicutes;Negativicutes;Selenomonadales;Veillonellaceae;Mitsuokella	0	0	0	0	0	0	0	0	0	0	0	0	0	0	0	0	0	0	0	0	0	0	29	0	0	0	0	0	0	0	0	0	0	0	0	0	0	0	0	0	0	0
Otu01906	Bacteria;Bacteroidetes;Bacteroidia;Bacteroidales;unclassified_Bacteroidales;	0	0	0	0	0	0	0	0	0	0	0	0	0	0	0	0	0	0	0	0	0	0	0	0	0	0	0	0	0	0	0	0	0	0	0	0	0	0	0	29	0	0
Otu01907	Bacteria;unclassified_Bacteria;;;;	0	4	0	0	0	0	0	0	0	0	0	0	0	0	2	0	0	0	0	0	0	0	0	1	0	0	2	0	0	0	1	0	0	0	0	0	0	0	7	12	0	0
Otu01908	Bacteria;Proteobacteria;Gammaproteobacteria;Enterobacteriales;Enterobacteriaceae;unclassified_Enterobacteriaceae	0	0	0	0	0	0	0	0	0	0	0	0	0	0	0	0	0	0	0	0	0	0	0	9	0	9	0	0	4	0	0	0	0	0	0	0	7	0	0	0	0	0
Otu01909	Bacteria;Firmicutes;Clostridia;Clostridiales;Lachnospiraceae;unclassified_Lachnospiraceae	4	0	0	0	0	7	4	0	0	0	0	0	0	0	0	0	0	0	0	0	0	0	0	0	0	0	0	0	0	4	0	0	3	0	6	0	0	0	0	0	1	0
Otu01910	Bacteria;Bacteroidetes;Bacteroidia;Bacteroidales;Rikenellaceae;Alistipes	0	0	0	0	0	0	0	0	0	0	0	24	0	0	0	0	0	0	5	0	0	0	0	0	0	0	0	0	0	0	0	0	0	0	0	0	0	0	0	0	0	0
Otu01911	Bacteria;Firmicutes;Clostridia;Clostridiales;Ruminococcaceae;Flavonifractor	0	1	0	0	0	1	0	0	1	0	0	1	0	0	0	1	0	0	2	0	1	1	0	0	0	0	0	2	0	0	0	11	0	0	2	0	1	0	0	0	3	0
Otu01912	Bacteria;Firmicutes;Clostridia;Clostridiales;Ruminococcaceae;Faecalibacterium	0	0	0	0	0	0	0	0	0	1	0	0	0	0	0	1	5	0	0	0	0	10	0	0	1	0	0	0	2	0	5	0	0	1	0	0	1	0	0	0	1	0
Otu01913	Bacteria;Bacteroidetes;Bacteroidia;Bacteroidales;Bacteroidaceae;Bacteroides	0	0	0	0	0	0	0	0	0	0	0	0	0	0	0	0	0	0	1	4	11	0	0	1	0	0	0	3	4	0	0	0	0	4	0	0	0	0	0	0	0	0
Otu01914	Bacteria;Proteobacteria;Gammaproteobacteria;Enterobacteriales;Enterobacteriaceae;Escherichia/Shigella	0	0	0	0	0	1	0	0	0	1	5	3	0	0	0	0	5	0	0	0	0	7	0	2	0	0	0	0	0	0	3	0	0	1	0	0	0	0	0	0	0	0
Otu01915	Bacteria;Bacteroidetes;Bacteroidia;Bacteroidales;Bacteroidaceae;Bacteroides	20	1	0	0	0	0	0	2	0	0	0	0	0	0	0	0	0	0	0	0	0	0	0	0	0	0	0	0	0	2	0	0	0	0	3	0	0	0	0	0	0	0
Otu01916	Bacteria;Bacteroidetes;Bacteroidia;Bacteroidales;Bacteroidaceae;Bacteroides	0	0	0	0	0	0	0	0	0	0	0	0	0	0	0	0	0	0	2	3	11	0	0	0	0	0	0	0	7	0	0	0	0	0	0	0	0	0	0	0	5	0
Otu01917	Bacteria;Firmicutes;Clostridia;Clostridiales;unclassified_Clostridiales;	0	1	0	0	0	2	0	18	0	0	3	0	0	1	1	0	0	0	0	1	1	0	0	0	0	0	0	0	0	0	0	0	0	0	0	0	0	0	0	0	0	0
Otu01918	Bacteria;Proteobacteria;Betaproteobacteria;Burkholderiales;Sutterellaceae;Parasutterella	0	0	0	0	0	4	0	1	0	0	0	0	0	0	0	0	0	0	3	0	2	0	0	0	0	0	0	0	3	2	0	0	0	3	9	0	0	0	1	0	0	0
Otu01919	Bacteria;Firmicutes;Clostridia;Clostridiales;Lachnospiraceae;unclassified_Lachnospiraceae	1	0	0	0	0	0	0	0	0	0	0	0	0	0	0	1	0	0	0	0	0	24	0	0	0	0	0	0	0	0	0	1	0	0	0	0	1	0	0	0	0	0
Otu01920	Bacteria;Firmicutes;Clostridia;Clostridiales;Lachnospiraceae;Roseburia	0	0	0	0	3	1	1	2	4	1	0	0	0	1	2	1	2	0	0	4	0	0	0	0	0	0	0	0	0	0	0	0	1	4	0	0	1	0	0	0	0	0
Otu01921	Bacteria;Firmicutes;Clostridia;Clostridiales;Ruminococcaceae;Faecalibacterium	2	2	0	0	2	0	0	1	0	0	0	0	2	1	0	2	0	1	0	0	0	0	0	0	0	0	0	0	2	0	0	0	1	4	7	0	1	0	0	0	0	0
Otu01922	Bacteria;Bacteroidetes;Bacteroidia;Bacteroidales;Porphyromonadaceae;Parabacteroides	0	0	0	0	0	0	0	0	0	0	0	0	0	0	0	0	0	0	0	2	2	0	0	2	1	0	0	0	11	0	0	0	0	1	0	0	0	0	0	0	9	0
Otu01923	Bacteria;Bacteroidetes;Bacteroidia;Bacteroidales;Bacteroidaceae;Bacteroides	0	0	0	0	0	0	0	0	0	0	0	0	0	0	0	0	0	0	0	7	6	0	0	0	0	1	0	0	10	0	0	0	0	4	0	0	0	0	0	0	0	0
Otu01924	Bacteria;Bacteroidetes;Bacteroidia;Bacteroidales;unclassified_Bacteroidales;	1	0	0	0	0	0	0	0	0	0	0	3	0	0	0	0	0	0	0	0	1	17	0	2	0	0	0	0	0	0	0	3	0	1	0	0	0	0	0	0	0	0
Otu01925	Bacteria;Bacteroidetes;Bacteroidia;Bacteroidales;Bacteroidaceae;Bacteroides	0	0	0	0	0	2	0	18	0	0	0	0	0	0	0	0	0	0	7	1	0	0	0	0	0	0	0	0	0	0	0	0	0	0	0	0	0	0	0	0	0	0
Otu01926	Bacteria;Firmicutes;Clostridia;Clostridiales;Ruminococcaceae;Faecalibacterium	0	3	0	0	1	1	0	0	0	1	0	0	4	2	0	2	0	1	2	3	0	0	0	0	0	0	0	0	0	0	0	0	0	6	0	0	0	0	0	0	0	2
Otu01927	Bacteria;Firmicutes;Clostridia;Clostridiales;Lachnospiraceae;unclassified_Lachnospiraceae	2	1	0	0	10	1	0	1	3	2	0	2	0	1	0	0	0	0	0	0	0	0	0	0	0	0	0	0	0	2	0	0	1	1	1	0	0	0	0	0	0	0
Otu01928	Bacteria;Firmicutes;Clostridia;Clostridiales;Ruminococcaceae;unclassified_Ruminococcaceae	0	0	8	0	3	0	0	0	1	0	0	0	9	0	0	0	0	2	5	0	0	0	0	0	0	0	0	0	0	0	0	0	0	0	0	0	0	0	0	0	0	0
Otu01929	Bacteria;Bacteroidetes;Bacteroidia;Bacteroidales;unclassified_Bacteroidales;	0	0	0	0	0	0	0	0	0	0	0	0	0	0	3	0	0	0	0	17	0	0	0	1	0	0	0	0	6	0	0	0	0	0	0	0	1	0	0	0	0	0
Otu01930	Bacteria;Firmicutes;Clostridia;Clostridiales;Ruminococcaceae;unclassified_Ruminococcaceae	0	0	0	1	2	1	0	3	2	5	0	0	0	0	0	3	0	0	10	0	0	0	0	0	0	0	0	0	0	0	0	0	0	0	0	0	0	1	0	0	0	0
Otu01931	Bacteria;Verrucomicrobia;Verrucomicrobiae;Verrucomicrobiales;Verrucomicrobiaceae;Akkermansia	0	0	0	0	0	0	0	0	0	0	28	0	0	0	0	0	0	0	0	0	0	0	0	0	0	0	0	0	0	0	0	0	0	0	0	0	0	0	0	0	0	0
Otu01932	Bacteria;Firmicutes;Negativicutes;Selenomonadales;Veillonellaceae;Megasphaera	0	0	0	0	0	0	0	0	0	0	0	0	0	0	0	0	1	0	24	0	0	0	0	0	0	0	0	0	0	0	0	0	0	0	0	0	0	0	3	0	0	0
Otu01933	Bacteria;Firmicutes;Erysipelotrichia;Erysipelotrichales;Erysipelotrichaceae;unclassified_Erysipelotrichaceae	6	0	0	0	0	0	0	1	0	0	0	1	0	0	0	0	0	0	19	0	1	0	0	0	0	0	0	0	0	0	0	0	0	0	0	0	0	0	0	0	0	0
Otu01934	Bacteria;Firmicutes;Clostridia;Clostridiales;Lachnospiraceae;unclassified_Lachnospiraceae	0	1	0	1	0	0	0	0	0	0	0	0	0	1	1	0	0	0	0	0	10	0	1	0	0	0	2	0	0	0	0	0	0	7	0	0	0	4	0	0	0	0
Otu01935	Bacteria;Firmicutes;Clostridia;Clostridiales;Ruminococcaceae;unclassified_Ruminococcaceae	0	0	0	0	1	3	0	0	0	5	2	2	0	1	2	9	0	0	3	0	0	0	0	0	0	0	0	0	0	0	0	0	0	0	0	0	0	0	0	0	0	0
Otu01936	Bacteria;Firmicutes;Clostridia;Clostridiales;Lachnospiraceae;unclassified_Lachnospiraceae	0	0	0	0	2	0	0	0	0	2	0	0	0	24	0	0	0	0	0	0	0	0	0	0	0	0	0	0	0	0	0	0	0	0	0	0	0	0	0	0	0	0
Otu01937	Bacteria;Bacteroidetes;Bacteroidia;Bacteroidales;Bacteroidaceae;Bacteroides	0	1	0	0	0	0	0	0	0	0	0	0	0	0	0	0	0	0	0	0	0	0	0	0	1	0	0	22	0	0	1	0	0	0	0	0	0	0	0	0	0	3
Otu01938	Bacteria;Firmicutes;Clostridia;Clostridiales;unclassified_Clostridiales;	0	0	0	0	2	17	0	0	1	0	0	0	0	0	0	0	0	0	0	8	0	0	0	0	0	0	0	0	0	0	0	0	0	0	0	0	0	0	0	0	0	0
Otu01939	Bacteria;Bacteroidetes;Bacteroidia;Bacteroidales;Bacteroidaceae;Bacteroides	0	0	0	0	0	0	0	0	0	0	0	0	0	0	1	0	0	0	0	11	0	0	0	0	0	2	0	0	7	0	0	0	0	0	0	0	0	0	0	0	7	0
Otu01940	Bacteria;Firmicutes;Clostridia;Clostridiales;Lachnospiraceae;unclassified_Lachnospiraceae	1	1	2	2	0	6	1	0	0	1	0	0	0	1	1	1	0	1	0	1	0	0	1	1	1	0	6	0	0	0	0	0	0	0	0	0	0	0	0	0	0	0
Otu01941	Bacteria;unclassified_Bacteria;;;;	0	2	13	1	0	0	0	0	0	0	0	0	0	0	1	0	2	0	0	0	0	0	1	0	0	0	0	0	0	0	0	0	0	0	0	0	0	1	0	0	0	7
Otu01942	Bacteria;Firmicutes;Clostridia;Clostridiales;Ruminococcaceae;Faecalibacterium	0	0	0	0	0	0	0	0	0	0	0	0	0	0	0	1	0	0	0	10	0	0	0	0	0	0	0	0	0	0	0	0	0	0	17	0	0	0	0	0	0	0
Otu01943	Bacteria;Proteobacteria;Deltaproteobacteria;unclassified_Deltaproteobacteria;;	0	0	0	0	0	0	0	0	0	0	0	0	0	0	23	5	0	0	0	0	0	0	0	0	0	0	0	0	0	0	0	0	0	0	0	0	0	0	0	0	0	0
Otu01944	Bacteria;Actinobacteria;Actinobacteria;Coriobacteriales;Coriobacteriaceae;Slackia	0	0	0	0	0	0	0	0	0	8	0	0	1	1	0	2	11	0	0	3	0	0	0	0	0	0	0	0	0	0	0	0	0	0	0	0	0	1	0	1	0	0
Otu01945	Bacteria;Firmicutes;Erysipelotrichia;Erysipelotrichales;Erysipelotrichaceae;Holdemanella	0	1	0	0	2	0	0	0	7	0	13	0	0	0	1	0	1	0	0	3	0	0	0	0	0	0	0	0	0	0	0	0	0	0	0	0	0	0	0	0	0	0
Otu01946	Bacteria;Bacteroidetes;Bacteroidia;Bacteroidales;Prevotellaceae;Prevotella	0	0	0	11	2	0	0	0	0	0	0	0	1	1	1	0	5	0	0	0	0	0	0	0	0	0	0	0	0	0	7	0	0	0	0	0	0	0	0	0	0	0
Otu01947	Bacteria;Bacteroidetes;Bacteroidia;Bacteroidales;Bacteroidaceae;Bacteroides	0	0	0	0	0	0	0	0	0	0	0	0	0	0	0	0	0	0	0	0	0	0	0	0	0	0	0	0	0	0	0	0	0	0	0	0	0	0	0	0	28	0
Otu01948	Bacteria;Bacteroidetes;Bacteroidia;Bacteroidales;Bacteroidaceae;Bacteroides	0	0	0	0	0	0	0	0	0	0	0	0	0	0	0	0	0	0	0	0	0	0	0	0	0	7	0	0	0	0	0	0	0	0	0	0	0	0	0	0	21	0
Otu01949	Bacteria;Firmicutes;Clostridia;Clostridiales;Lachnospiraceae;unclassified_Lachnospiraceae	2	0	0	0	1	1	0	9	2	1	0	0	0	0	3	0	0	2	0	2	0	0	0	0	0	0	1	0	0	1	0	0	1	0	2	0	0	0	0	0	0	0
Otu01950	Bacteria;Bacteroidetes;Bacteroidia;Bacteroidales;unclassified_Bacteroidales;	0	0	0	0	0	0	0	0	0	0	0	0	0	0	1	0	0	1	0	0	1	0	1	1	1	0	4	3	0	0	0	0	0	0	0	7	0	0	0	8	0	0
Otu01951	Bacteria;Bacteroidetes;Bacteroidia;Bacteroidales;Rikenellaceae;Alistipes	0	0	0	0	0	1	0	0	0	0	19	0	0	0	0	0	0	0	8	0	0	0	0	0	0	0	0	0	0	0	0	0	0	0	0	0	0	0	0	0	0	0
Otu01952	Bacteria;Verrucomicrobia;Verrucomicrobiae;Verrucomicrobiales;Verrucomicrobiaceae;Akkermansia	0	0	0	0	0	0	0	0	0	0	28	0	0	0	0	0	0	0	0	0	0	0	0	0	0	0	0	0	0	0	0	0	0	0	0	0	0	0	0	0	0	0
Otu01953	Bacteria;Firmicutes;Clostridia;Clostridiales;Ruminococcaceae;unclassified_Ruminococcaceae	0	0	0	0	0	0	0	8	0	0	19	0	0	0	0	0	0	0	0	1	0	0	0	0	0	0	0	0	0	0	0	0	0	0	0	0	0	0	0	0	0	0
Otu01954	Bacteria;Bacteroidetes;Bacteroidia;Bacteroidales;Prevotellaceae;Prevotella	0	13	1	0	0	0	0	0	0	0	0	0	0	0	0	0	0	0	0	0	0	0	0	0	2	0	0	0	0	0	0	0	0	0	0	12	0	0	0	0	0	0
Otu01955	Bacteria;Firmicutes;Negativicutes;Selenomonadales;Acidaminococcaceae;Phascolarctobacterium	0	0	8	0	0	0	0	0	0	0	0	0	0	0	2	2	0	0	0	0	0	11	0	0	0	0	0	0	0	0	0	0	0	0	0	0	0	0	5	0	0	0
Otu01956	Bacteria;Bacteroidetes;Bacteroidia;Bacteroidales;Prevotellaceae;Prevotella	0	0	0	0	1	0	0	0	0	1	0	0	0	3	0	1	1	0	0	0	0	0	0	0	5	0	0	0	0	0	0	0	0	0	0	0	0	16	0	0	0	0
Otu01957	Bacteria;unclassified_Bacteria;;;;	0	0	0	0	0	0	0	0	2	0	0	0	0	0	0	0	0	1	0	0	0	0	0	0	0	0	0	0	0	0	0	0	25	0	0	0	0	0	0	0	0	0
Otu01958	Bacteria;Bacteroidetes;Bacteroidia;Bacteroidales;Bacteroidaceae;Bacteroides	0	0	0	0	0	0	0	0	0	0	0	0	0	0	0	0	0	0	0	3	0	0	0	0	0	1	0	0	22	0	0	0	0	0	0	0	0	0	0	0	2	0
Otu01959	Bacteria;Firmicutes;unclassified_Firmicutes;;;	1	0	1	0	0	1	0	0	0	0	2	6	0	0	0	4	1	0	4	0	0	0	0	0	0	0	0	0	0	2	0	1	0	5	0	0	0	0	0	0	0	0
Otu01960	Bacteria;Bacteroidetes;Bacteroidia;Bacteroidales;Bacteroidaceae;Bacteroides	15	0	0	0	0	0	0	0	1	0	0	1	0	0	0	0	0	0	2	1	0	0	0	0	0	0	0	0	0	0	0	0	0	3	3	0	0	0	0	0	1	0
Otu01961	Bacteria;Firmicutes;Clostridia;Clostridiales;Ruminococcaceae;Faecalibacterium	0	0	0	0	0	0	0	0	0	0	0	0	0	0	0	0	0	0	0	1	0	0	0	0	0	0	0	0	0	0	1	0	1	6	13	0	0	0	0	0	0	5
Otu01962	Bacteria;Bacteroidetes;Bacteroidia;Bacteroidales;Bacteroidaceae;Bacteroides	5	0	0	0	0	0	2	0	0	0	3	13	0	0	0	2	0	0	0	0	0	0	0	0	0	0	0	0	0	0	0	0	0	0	2	0	0	0	0	0	0	0
Otu01963	Bacteria;Firmicutes;Clostridia;unclassified_Clostridia;;	0	0	4	0	2	0	0	0	0	0	0	0	0	1	0	9	0	0	11	0	0	0	0	0	0	0	0	0	0	0	0	0	0	0	0	0	0	0	0	0	0	0
Otu01964	Bacteria;unclassified_Bacteria;;;;	0	0	0	0	0	11	0	3	0	0	1	0	0	0	0	0	0	0	12	0	0	0	0	0	0	0	0	0	0	0	0	0	0	0	0	0	0	0	0	0	0	0
Otu01965	Bacteria;Firmicutes;Clostridia;Clostridiales;unclassified_Clostridiales;	0	1	0	0	0	1	0	0	0	0	0	0	0	0	0	0	0	0	8	0	0	0	0	0	0	0	0	0	0	0	0	0	0	16	0	0	0	0	0	1	0	0
Otu01966	Bacteria;Firmicutes;Clostridia;Clostridiales;Lachnospiraceae;Blautia	2	2	0	1	3	0	0	4	0	1	0	1	0	1	1	0	0	0	0	1	0	0	0	0	0	0	0	0	0	0	0	0	0	7	1	0	0	0	2	0	0	0
Otu01967	Bacteria;Firmicutes;Clostridia;Clostridiales;Lachnospiraceae;unclassified_Lachnospiraceae	1	0	0	0	0	0	0	3	0	0	0	0	0	0	0	0	0	0	16	1	4	0	0	0	0	0	0	0	0	0	0	0	0	1	1	0	0	0	0	0	0	0
Otu01968	Bacteria;Firmicutes;Erysipelotrichia;Erysipelotrichales;Erysipelotrichaceae;unclassified_Erysipelotrichaceae	7	1	0	0	0	0	1	4	0	0	1	0	0	0	0	1	0	0	1	0	7	0	0	0	0	0	0	1	0	0	0	0	0	2	0	0	0	0	0	0	1	0
Otu01969	Bacteria;Bacteroidetes;Bacteroidia;Bacteroidales;Porphyromonadaceae;Coprobacter	0	0	0	0	0	0	0	0	0	0	0	0	0	0	0	0	0	0	0	0	1	0	0	0	0	0	0	0	0	0	0	0	0	26	0	0	0	0	0	0	0	0
Otu01970	Bacteria;Actinobacteria;Actinobacteria;Bifidobacteriales;Bifidobacteriaceae;unclassified_Bifidobacteriaceae	0	0	0	0	0	0	0	0	0	0	0	24	0	0	0	0	0	0	3	0	0	0	0	0	0	0	0	0	0	0	0	0	0	0	0	0	0	0	0	0	0	0
Otu01971	Bacteria;Firmicutes;Clostridia;Clostridiales;Lachnospiraceae;Clostridium XlVa	0	0	0	0	0	1	0	0	0	0	0	26	0	0	0	0	0	0	0	0	0	0	0	0	0	0	0	0	0	0	0	0	0	0	0	0	0	0	0	0	0	0
Otu01972	Bacteria;Firmicutes;Clostridia;Clostridiales;Lachnospiraceae;unclassified_Lachnospiraceae	0	0	0	0	0	0	0	0	1	6	0	0	0	0	0	2	6	0	0	10	0	0	0	0	0	0	0	0	0	0	0	0	0	0	0	0	0	2	0	0	0	0
Otu01973	Bacteria;Firmicutes;Clostridia;Clostridiales;Ruminococcaceae;Faecalibacterium	0	0	0	1	4	0	0	0	0	6	0	0	2	2	3	3	0	0	0	0	0	0	0	0	0	0	0	0	0	0	0	0	0	5	0	0	0	1	0	0	0	0
Otu01974	Bacteria;Firmicutes;Negativicutes;Selenomonadales;unclassified_Selenomonadales;	0	0	0	0	0	0	0	0	0	0	0	0	0	0	0	0	0	0	27	0	0	0	0	0	0	0	0	0	0	0	0	0	0	0	0	0	0	0	0	0	0	0
Otu01975	Bacteria;Bacteroidetes;Bacteroidia;Bacteroidales;Porphyromonadaceae;Barnesiella	0	0	0	0	0	5	0	6	0	0	1	4	0	0	0	0	0	0	0	0	0	0	0	0	0	0	0	0	0	0	0	0	0	11	0	0	0	0	0	0	0	0
Otu01976	Bacteria;Firmicutes;Clostridia;Clostridiales;Lachnospiraceae;unclassified_Lachnospiraceae	0	1	0	0	0	1	0	1	0	2	0	0	0	0	2	1	0	2	1	0	1	0	0	0	0	0	2	3	0	0	0	0	2	5	1	0	0	0	0	1	0	1
Otu01977	Bacteria;Bacteroidetes;Bacteroidia;Bacteroidales;Prevotellaceae;Prevotella	0	0	0	0	0	0	0	0	0	0	0	0	0	1	0	1	0	3	0	0	1	0	0	0	1	0	1	0	0	0	0	0	0	3	0	0	0	0	0	0	0	16
Otu01978	Bacteria;Firmicutes;Clostridia;Clostridiales;Ruminococcaceae;Faecalibacterium	0	19	0	0	2	0	0	0	0	0	0	0	6	0	0	0	0	0	0	0	0	0	0	0	0	0	0	0	0	0	0	0	0	0	0	0	0	0	0	0	0	0
Otu01979	Bacteria;unclassified_Bacteria;;;;	16	0	0	0	0	0	1	0	0	0	0	1	0	0	0	0	0	0	8	0	0	0	0	0	0	0	0	0	0	0	0	1	0	0	0	0	0	0	0	0	0	0
Otu01980	Bacteria;Firmicutes;Clostridia;Clostridiales;Ruminococcaceae;unclassified_Ruminococcaceae	0	0	0	5	2	0	0	0	0	4	2	0	0	0	1	3	0	3	0	5	0	0	0	0	0	0	0	0	0	0	0	0	0	0	0	0	2	0	0	0	0	0
Otu01981	Bacteria;Firmicutes;Clostridia;Clostridiales;Lachnospiraceae;Clostridium XlVa	1	0	0	2	0	1	8	1	3	1	0	0	2	0	2	0	0	2	0	0	0	0	0	0	0	0	2	0	0	0	0	0	0	2	0	0	0	0	0	0	0	0
Otu01982	Bacteria;Firmicutes;Clostridia;Clostridiales;Ruminococcaceae;Oscillibacter	0	2	0	0	1	1	0	2	0	4	0	0	2	3	3	3	0	0	1	0	0	0	0	0	0	0	0	0	0	0	1	0	0	2	0	0	0	2	0	0	0	0
Otu01983	Bacteria;Bacteroidetes;Bacteroidia;Bacteroidales;Bacteroidaceae;Bacteroides	0	0	0	0	0	0	0	0	0	0	0	0	0	0	1	0	0	0	0	2	0	0	0	1	0	1	0	0	1	0	0	0	0	0	8	0	4	0	0	0	9	0
Otu01984	Bacteria;Bacteroidetes;Bacteroidia;Bacteroidales;Bacteroidaceae;Bacteroides	0	0	0	0	0	0	0	0	0	0	0	0	0	0	0	0	0	0	0	0	0	0	0	0	0	0	0	0	27	0	0	0	0	0	0	0	0	0	0	0	0	0
Otu01985	Bacteria;Firmicutes;Clostridia;Clostridiales;Ruminococcaceae;unclassified_Ruminococcaceae	0	0	0	0	0	0	0	0	0	0	0	0	3	1	0	0	0	0	0	0	0	0	0	0	0	0	0	0	0	0	0	0	0	23	0	0	0	0	0	0	0	0
Otu01986	Bacteria;Bacteroidetes;Bacteroidia;Bacteroidales;Porphyromonadaceae;Barnesiella	0	0	0	0	0	1	0	16	0	0	0	0	0	0	1	0	0	0	0	0	3	0	0	1	0	0	0	0	3	1	0	0	1	0	0	0	0	0	0	0	0	0
Otu01987	Bacteria;Firmicutes;Negativicutes;Selenomonadales;Veillonellaceae;Dialister	0	0	0	0	0	0	0	0	0	0	0	0	11	8	0	0	8	0	0	0	0	0	0	0	0	0	0	0	0	0	0	0	0	0	0	0	0	0	0	0	0	0
Otu01988	Bacteria;Firmicutes;Clostridia;Clostridiales;Lachnospiraceae;Clostridium XlVa	0	0	0	0	3	0	0	0	2	0	0	0	0	3	0	2	3	0	0	0	0	0	0	0	1	0	4	0	0	0	0	0	0	0	0	0	3	3	0	0	3	0
Otu01989	Bacteria;Bacteroidetes;Bacteroidia;Bacteroidales;Prevotellaceae;Prevotella	0	0	0	1	1	0	0	0	17	2	0	0	3	2	0	0	1	0	0	0	0	0	0	0	0	0	0	0	0	0	0	0	0	0	0	0	0	0	0	0	0	0
Otu01990	Bacteria;Bacteroidetes;Bacteroidia;Bacteroidales;Prevotellaceae;unclassified_Prevotellaceae	0	17	0	0	5	0	0	0	0	0	0	0	5	0	0	0	0	0	0	0	0	0	0	0	0	0	0	0	0	0	0	0	0	0	0	0	0	0	0	0	0	0
Otu01991	Bacteria;Bacteroidetes;Bacteroidia;Bacteroidales;Bacteroidaceae;Bacteroides	0	0	0	0	0	0	0	0	0	0	0	0	0	0	0	0	0	0	0	0	0	0	0	0	0	0	0	0	27	0	0	0	0	0	0	0	0	0	0	0	0	0
Otu01992	Bacteria;unclassified_Bacteria;;;;	0	0	0	0	0	0	0	0	0	0	0	0	0	0	0	0	0	0	0	0	0	0	0	0	0	0	0	0	0	1	0	26	0	0	0	0	0	0	0	0	0	0
Otu01993	Bacteria;Bacteroidetes;Bacteroidia;Bacteroidales;Prevotellaceae;Prevotella	0	0	0	6	0	0	0	0	0	1	0	0	6	1	5	1	3	0	0	0	0	0	0	0	0	0	0	0	0	0	3	0	0	1	0	0	0	0	0	0	0	0
Otu01994	Bacteria;Bacteroidetes;Bacteroidia;Bacteroidales;Bacteroidaceae;Bacteroides	0	0	0	0	0	0	0	0	0	0	0	0	0	0	0	0	0	0	0	0	0	26	0	0	0	0	0	0	0	1	0	0	0	0	0	0	0	0	0	0	0	0
Otu01995	Bacteria;Bacteroidetes;Bacteroidia;Bacteroidales;Prevotellaceae;unclassified_Prevotellaceae	0	5	0	4	4	0	0	0	0	2	0	0	0	1	0	5	0	3	0	0	0	0	0	0	0	0	0	0	0	0	0	0	0	0	0	0	0	3	0	0	0	0
Otu01996	Bacteria;Bacteroidetes;Bacteroidia;Bacteroidales;Prevotellaceae;Prevotella	0	0	0	0	0	0	0	0	0	0	0	0	0	0	0	0	0	0	0	0	0	0	0	0	0	0	0	0	0	27	0	0	0	0	0	0	0	0	0	0	0	0
Otu01997	Bacteria;unclassified_Bacteria;;;;	0	0	0	0	0	0	0	0	0	0	0	0	3	0	0	0	0	0	0	0	0	0	0	4	0	0	8	0	0	0	0	0	0	0	0	0	0	0	0	12	0	0
Otu01998	Bacteria;Firmicutes;Clostridia;Clostridiales;Lachnospiraceae;Clostridium XlVb	0	0	0	0	0	0	0	0	0	0	0	1	0	0	0	0	0	0	0	0	0	7	0	0	0	0	0	0	0	0	0	18	0	0	0	0	0	0	0	0	0	0
[truncated: 10,413 more rows]
